# Supplementary material for: Understanding the progress of COVID-19 transmission in a rural district: a social network approach
Source: PeerJ journal article supplement (doi:10.7717/peerj.18571), 2024-11-28
Supplement: fig_s2_v3.pdf [file fig_s2_v3.pdf]

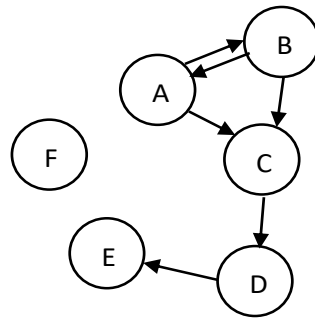

Indegree (A): 1  
 Indegree (B): 1  
 Indegree (C): 2  
 Indegree (D): 1  
 Indegree (E): 1  
 Indegree (F): 0

Outdegree (A): 2  
 Outdegree (B): 2  
 Outdegree (C): 1  
 Outdegree (D): 1  
 Outdegree (E): 0  
 Outdegree (F): 0

Harmonic closeness (A) =  $(1/1+1/1+0+0+0) = 2$   
 Harmonic closeness (B) =  $(1/1+1/1+0+0+0) = 2$   
 Harmonic closeness (C) =  $(0+0+1/1+0+0) = 1$   
 Harmonic closeness (D) =  $(0+0+0+1/1+0) = 1$   
 Harmonic closeness (E) =  $(0+0+0+0+0) = 0$   
 Harmonic closeness (F) =  $(0+0+0+0+0) = 0$

Betweenness (A) = 0  
 Betweenness (B) = 1  
 Betweenness (C) = 2  
 Betweenness (D) = 1  
 Betweenness (E) = 0  
 Betweenness (F) = 0
