# Supplementary material for: Understanding the progress of COVID-19 transmission in a rural district: a social network approach
Source: PeerJ journal article supplement (doi:10.7717/peerj.18571), 2024-11-28

i) All positive case

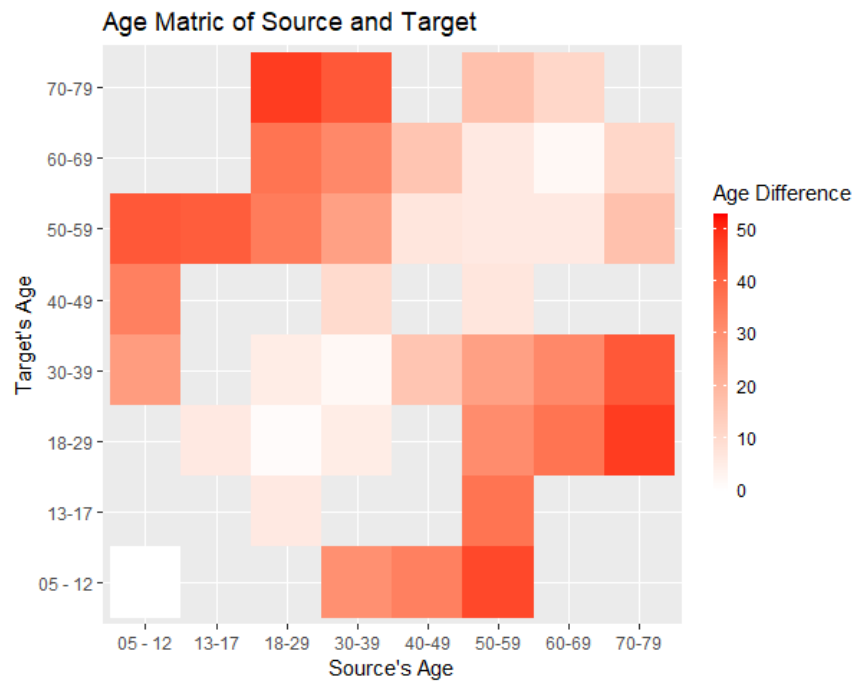

ii) Positive male cases

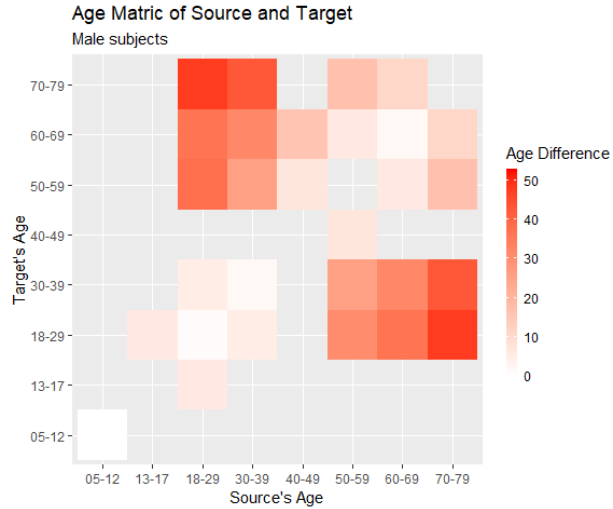

iii) Positive female cases

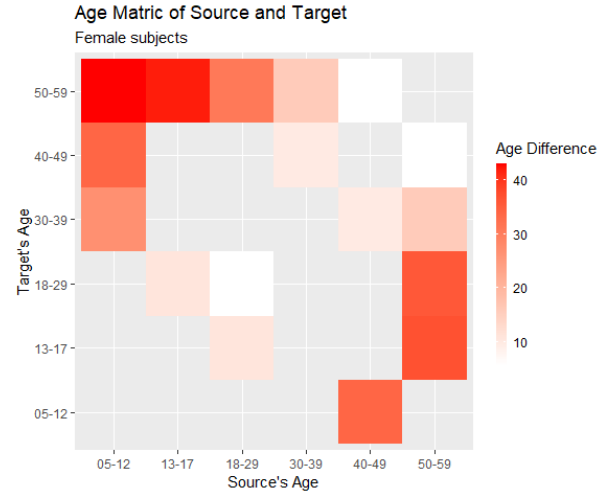

Supplement: Figure_S4_v3.pdf [file Figure_S4_v3.pdf]
