# Supplementary material for: Understanding the progress of COVID-19 transmission in a rural district: a social network approach
Source: PeerJ. 2024 Nov 28;12:e18571. doi: 10.7717/peerj.18571 (PMC11608564; doi:10.7717/peerj.18571)
Supplement: Supplemental Information 7 — Dataset comprised of attributes of COVID-19 confirmed cases and their respective close contacts. [file peerj-12-18571-s007.xlsx]

## Sheet: HS node attribute
Id	Label	Age	Date of birth	Race	Gender	Citizen	Address	Latitude	Longitude	Area	State	Area	Occupation	Workplace address	Symptom status	Onset	Relation to case	Last contact	Infection status	Cluster	Notification date	Sample date 1	Result date 1	Result 1	Sample date 2	Result date 2	Result 2	Final result
HS001	HS001	50	700123-01-5606	Melayu	Female	Citizen	No 49, Jalan Melor 8, Desa Melor, 48200 Serendah, Selangor	3.35774	101.631	Serendah	Selangor	Serendah			PUI					UDA Holding		2020-02-03	2020-02-03	POSITIF				POSITIF
HS002	HS002	73	461213-01-5655	Melayu	Male	Citizen	No 57, Pjs 2c/6, Taman Dato Harun, Jalan Klang Lama	3.46661	101.662	Batang Kali	Selangor									Seri Petaling Yakiniah		2020-12-03	14/3/2020	POSITIF				POSITIF
HS003	HS003	20	1999-07-12	Melayu	Male	Citizen	Lot 1496 Kampung Gaung Lemal Lati, 17000 Pasir Mas, Kelantan	6.02776	102.127	Batang Kali	Selangor									Seri Petaling Yakiniah		15/3/2020		POSITIF				POSITIF
HS004	HS004	37		Foreigner	Male	Non-citizen	No 54, Floor 3, Jalan 2/3a Pusat Bandar Utara, 61800 Bt Caves, Selangor	3.23684	101.67		Selangor						TABLIGH			Seri Petaling Yakiniah	15.3.2020	15/3/2020		POSITIF				POSITIF
HS005	HS005	55	22/8/1965	Melayu	Female	Citizen	No 11 Jalan Kasturi 4c, Bukit Beruntung Rawang	3.40549	101.572	Serendah	Selangor	Serendah								SK TBR 1	22.3.2020	22.3.2020	22/3/2020	POSITIF				POSITIF
HS006	HS006	59	20/1/1960	Melayu	Male	Citizen	No 13, Jalan Seroja 5c, Seksyen Bukit Sentosa, 48300 Selangor	3.41253	101.584	Serendah	Selangor									Seri Petaling Surau Jln Seroja	21.3.2020	21.3.2020	25.3.2020	POSITIF				POSITIF
HS007	HS007	25	30/11/1996	Melayu	Female	Citizen	No. 11 Jln Kasturi 4c, Bukit Beruntung	3.40549	101.572	Serendah	Selangor									Kontak Zaitun	22.3.2020	22.3.2020	22.3.2020	POSITIF				POSITIF
HS008	HS008	19	20/7/2001	Melayu	Female	Citizen	No. 11 Jln Kasturi 4c, Bukit Beruntung	3.40549	101.572	Serendah	Selangor									Kontak Zaitun	22.3.2020	22.3.2020	22.3.2020	POSITIF				POSITIF
HS009	HS009	53	15/9/1967	Melayu	Female	Citizen	14 Jln 14 Taman Ampang Pecah 44000 Kkb	3.54853	101.659	Ampang Pecah	Selangor									Seri Petaling Homestay Hulu Bernam	19.3.2020	19.3.2020	23.3.2020	POSITIF				POSITIF
HS010	HS010	60	25/7/1960	Melayu	Female	Citizen	No. 11 Jln Kasturi 4c, Bukit Beruntung	3.40549	101.572	Serendah	Selangor	Serendah								Kontak Zaitun	22.3.2020	22.3.2020	22.3.2020	POSITIF				POSITIF
HS011	HS011	58	19/9/1962	Melayu	Male	Citizen	No. 23, Jalan Kemboja 4c/5, Seksyen B 58 Bukit Sentosa 3, 48300	3.40972	101.594	Serendah	Selangor	Serendah								Seri Petaling	25.3.2020	25.3.2020	27.3.2020	POSITIF				POSITIF
HS012	HS012	22	24/1/1998	Melayu	Female	Citizen	36, Jalan Kemboja 5213, Bukit Sentosa 48300	3.41202	101.594	Serendah	Selangor									Sekolah Tahfiz Seri Petaling	25.3.2020	25.3.2020	27.3.2020	POSITIF				POSITIF
HS013	HS013	24	1996-04-07	Melayu	Male	Citizen	Kg Tg Batu Darat, Jalan Imam Galundang P/5 61652, 91026 Tawau, Sabah	4.28767	117.879	Batang Kali	Selangor									Seri Petaling Yakiniah	19.3.2020	19.3.2020	21.3.2020	POSITIF				POSITIF
HS014	HS014	36	29/12/1983	Melayu	Male	Citizen	Lot Pt 28938 Jalan 1/25, Pandan Indah, 55100 Ampang, Kl	3.13017	101.752	Batang Kali	Selangor									Seri Petaling Yakiniah	19.3.2020	19.3.2020	21.3.2020	POSITIF				POSITIF
HS015	HS015	49	22/1/1971	Melayu	Male	Citizen	No. 21 Jln Telipot 1a/3 Seksyen Bb9, B.B / Sk Tbr 1	3.40653	101.595	Serendah	Selangor									Kontak Zaitun	23.3.2020	23.3.2020	27.3.2020	POSITIF				POSITIF
HS016	HS016	39	1981-01-07	Melayu	Male	Citizen	P-1-10 Apartment Dahlia Taman Bunga Raya	3.43757	101.548	Serendah	Selangor									Kontek Zaitun	25.3.2020	25.3.2020	28.3.2020	POSITIF				POSITIF
HS017	HS017	24	26/1/1996	Melayu	Male	Citizen	Tb 5670, Lorong Ria 6d, Taman Ria 6, Jalan Utara, Tawau, Sabah	5.96469	116.105	Batang Kali	Selangor									Seri Petaling Yakiniah	27.3.2020	27.3.2020	31.3.2020	POSITIF				POSITIF
HS018	HS018	35		Foreigner	Male	Non-citizen	No 54, Floor 3, Jalan 2/3a Pusat Bandar Utara, 61800 Bt Caves, Selangor	3.23684	101.67	Batang Kali	Selangor									Seri Petaling Yakiniah	27.3.2020	27.3.2020	31.3.2020	POSITIF				POSITIF
HS019	HS019	25	1995-09-03	Melayu	Male	Citizen	No.3 Jalan Pjs 2c/19,46000 Tmn Medan,Pj Selangor	3.08196	101.632	Batang Kali	Selangor									Seri Petaling Yakiniah	27.3.2020	27.3.2020	31.3.2020	POSITIF				POSITIF
HS020	HS020	64	1956-08-05	Melayu	Male	Citizen	Surau Yakiniah Kg Genting Malek Btg Kali	3.46661	101.662	Batang Kali	Selangor									Seri Petaling Yakiniah	27.3.2020	27.3.2020	31.3.2020	POSITIF				POSITIF
HS021	HS021	31	27/5/1989	Melayu	Female	Citizen	No. 18, Jalan Melorsari 7, Bandar Sungai Buaya, Selangor			Serendah	Selangor									Sg Buaya			30.3.2020	POSITIF				POSITIF
HS022	HS022	16	2004-11-02	Melayu	Female	Citizen	No. 13 Jln Seroja 5c, Bukit Sentosa	3.41253	101.584	Serendah	Selangor									MD. Rafiee	24.3.2020	24.3.2020	1.4.2020	POSITIF				POSITIF
HS023	HS023	67	15/10/1953	Melayu	Male	Citizen	No. 81, Kg Pasir Putih Kalumpang			Kalumpang	Selangor										30.3.2020	30.3.2020	2.4.2020	POSITIF				POSITIF
HS024	HS024	53	1967-10-02	Melayu	Male	Citizen	No. 13 Jln Seroja 5c, Bukit Sentosa	3.41253	101.584	Serendah	Selangor									MD. Rafiee	24.3.2020	24.3.2020	1.4.2020	POSITIF				POSITIF
HS025	HS025	9	2011-04-11	Melayu	Male	Citizen	P-1-10 Apartment Dahlia Taman Bunga Raya	3.43757	101.548	Serendah	Selangor									Kontek Zaiton Abd Rahman	25.3.2020	25.3.2020	2020-02-04	POSITIF				POSITIF
HS026	HS026	55	1965-05-07	Melayu	Male	Citizen	No. 23, Jalan Kemboja 4C/5, Seksyen BS 8, Bukit Sentosa 3, 48300, Rawang	3.41194	101.595	Serendah	Selangor									Kontak Ismail Hassan (Tabligh)	26.3.2020	26.3.2020	3.4.2020	POSITIF				POSITIF
HS027	HS027	24	1996-09-08	Melayu	Female	Citizen	No. 23, Jalan Kemboja 4C/5, Seksyen BS 8, Bukit Sentosa 3, 48300, Rawang	3.41194	101.595	Serendah	Selangor									Kontak Ismail Hassan (Tabligh)	26.3.2021	26.3.2021	3.4.2020	POSITIF				POSITIF
HS028	HS028	13	2007-01-10	Melayu	Male	Citizen	No. 23, Jalan Kemboja 4C/5, Seksyen BS 8, Bukit Sentosa 3, 48300, Rawang	3.41194	101.595	Serendah	Selangor									Kontak Ismail Hassan (Tabligh)	26.3.2021	26.3.2021	3.4.2020	POSITIF				POSITIF
HS029	HS029	46	1974-02-12	Melayu	Female	Citizen	No 11, Jalan Geriang Utama 2, Taman Seri Geriang, Hulu Bernam	3.66857	101.525	Hulu Bernam	Selangor									Seri Petaling Kontak Mustafa Kamal	26.3.2020	26.3.2020	4.4.2020	POSITIF				POSITIF
HS030	HS030	38	19/8/1982	Melayu	Female	Citizen	No. E8, Kuarters IKBN Pertak, Ampang Pecah			Ampang Pecah	Selangor									IKBN	31.3.2020	31.3.2020	4.4.2020	POSITIF				POSITIF
HS031	HS031	56	23/12/1963	Melayu	Male	Citizen	68, Jalan 2c/11p, Taman Medan, Bt 8, Jalan Klang Lama, 46000 Pj, Selangor	3.08407	101.624	Batang Kali (Yakiniah)	Selangor									Seri Petaling Yakiniah	26.3.2020	26.3.2020	3.4.2020	POSITIF				POSITIF
HS032	HS032	32	17/8/1988	Melayu	Male	Citizen	No 12, Jln Pjs 2c/18, Kampung Medan, 46000 Pj, Selangor	3.07938	101.633	Batang Kali (Yakiniah)	Selangor									Seri Petaling Yakiniah	26.3.2020	26.3.2020	4.4.2020	POSITIF				POSITIF
HS033	HS033	20	2000-02-10	Melayu	Male	Citizen	No. 23, Jalan Kemboja 4C/5, Seksyen BS 8, Bukit Sentosa 3, 48300, Rawang	3.41194	101.595	Serendah	Selangor									Kontak Ismail Hassan (Tabligh)	26.3.2021	26.3.2021	4.4.2020	POSITIF				POSITIF
HS034	HS034	37	1983-09-01	Melayu	Male	Citizen	JKR 1033, Jalan Besar Ulu Yam Masjid Lama Batang Kali			Batang Kali	Selangor									AS-SAJIDDIN	30.3.2020	30.3.2020	4.4.2020	POSITIF				POSITIF
HS035	HS035	46	22/1/1974	Melayu	Male	Citizen	139, Taman Genting Permai 44300 Batang Kali			Batang Kali	Selangor									Elektirikal Bkt Jalil	31.3.2020	31.3.2020	4.4.2020	POSITIF				POSITIF
HS036	HS036	56	1964-01-02	Melayu	Female	Citizen	6624, Jalan Besar, Felda Gedangsa 44020, Hulu Selangor			Hulu Bernam	Selangor									London	31.3.2020	31.3.2020	6.4.2020	POSITIF				POSITIF
HS037	HS037	34	90/51/C4	Foreigner	Female	Non-citizen	Madrasah Quran Wa Sunnah Jalan Lama Genting			Batang Kali	Selangor									MADRASAH QURAN WA SUNNAH	24.3.2020	24.3.2020	31.3.2020	POSITIF				POSITIF
HS038	HS038	12	22/8/2008	Melayu	Female	Citizen	J-3-5 Apartment Cempaka Taman Bunga Raya 48300 Rawang			Serendah	Selangor									SK TBR 1	1.4.2020	1.4.2020	7.4.2020	POSITIF				POSITIF
HS039	HS039	12	30/7/2008	Melayu	Male	Citizen	N-2-23a Apartment Dahlia, Taman Bunga Raya Bukit Beruntung 48300 Rawang			Serendah	Selangor									SK TBR 1	1.4.2020	1.4.2020	7.4.2020	POSITIF				POSITIF
HS040	HS040	9	2011-08-02	Melayu	Female	Citizen	F-1-17' Apt Dahlia Taman Bunga Raya Bukit Beruntung 48300 Rawang	3.43799	101.551	Serendah	Selangor									SK TBR 1	1.4.2020	1.4.2020	7.4.2020	POSITIF				POSITIF
HS041	HS041	27	31/42/90	Melayu	Male	Citizen	N-2-37 Aparment Kenanga 48300 Rawang			Serendah	Selangor									SK TBR 1	1.4.2020	1.4.2020	7.4.2020	POSITIF				POSITIF
HS042	HS042	9	29/6/2011	Melayu	Male	Citizen	Q-2-11 Apt Dahlia Jalan Bunga Raya 1 Taman Bunga Raya Bukit Beruntung 48300 Rawang	3.43757	101.548	Serendah	Selangor									SK TBR 1	1.4.2020	1.4.2020	7.4.2020	POSITIF				POSITIF
HS043	HS043	61	1959-08-10	Melayu	Male	Citizen	No. 5, Jalan Kemboja 4A/4, Bukit Sentosa, Serendah	3.41705	101.593	Serendah	Selangor									Surau Kemboja	31.3.2020	31.3.2020	7.4.2020	POSITIF				POSITIF
HS044	HS044	9	2011-08-11	Melayu	Female	Citizen	Block L-4-30 Apt Kenanga Taman Bunga Raya Bukit Beruntung 48300 Rawang	3.43873	101.546	Serendah	Selangor									SK TBR 1	1.4.2020	1.4.2020	7.4.2020	POSITIF				POSITIF
HS045	HS045	41	1979-03-09	Melayu	Female	Citizen	No 15,Jalan Seroja 1,Bb 7,Bukit Beruntung,48300 Rawang.Selangor	3.41833	101.568	Serendah	Selangor									SK TBR 1	1.4.2020	1.4.2020	9.4.2020	POSITIF				POSITIF
HS046	HS046	27	1993-06-09	Melayu	Male	Citizen	Maahad Al-Mustafa Hulu Tamu 44300 Batang Kali			Batang Kali	Selangor				YES	28.3.2020	TABLIGH	19.3.2020		MAAHAD AL MUSTHOFA	7.4.2020	8.4.2020	10.4.2020	POSITIF				POSITIF
HS047	HS047	7	28/11/2013	Melayu	Female	Citizen	A-1-25, Apartment Dahlia TBR, Bukit Beruntung	3.43071	101.562	Serendah	Selangor									Kontek Kes Norhazah	14.4.2020	14.4.2020	16.4.2020	POSITIF				POSITIF
HS048	HS048	27	1993-08-09	Melayu	Male	Citizen	Q-1-13A Apartment Dahlia Taman Bunga Raya Bukit Beruntung			Serendah	Selangor				YES	4.4.2020				HCW	10.4.2020	31.3.2020	11.4.2020	POSITIF				POSITIF
HS049	HS049	62	26/2/1958	Melayu	Male	Citizen	No 136, Jalan Indah 2/6, Taman Kluang Indah, 86000 Kluang, Johor	2.01229	103.332	Batang Kali	Selangor									Seri Petaling Yakiniah	3.4.2020	3.4.2020	9.4.2020	POSITIF				POSITIF
HS050	HS050	30	14/1/1990	Melayu	Male	Citizen	H-3-9, Taman Medan Cahaya, Petaling Jaya	3.08159	101.635	Batang Kali	Selangor									Seri Petaling Yakiniah	3.3.2020	3.3.2020	9.4.2020	POSITIF				POSITIF
HS051	HS051	31	1989-03-06	India	Female	Citizen	No 36 Jalan Cempaka 6, Taman Cempaka Serendah			Serendah	Selangor									kontek kes kaliappan	27.4.2020	27.4.2020	29.4.2020	POSITIF				POSITIF
HS052	HS052	14	29/6/2006	Melayu	Female	Citizen	No 5 Jalan Songket 2b Taman Desa Bukit Bujang 44000, Selangor			Ampang Pecah	Selangor									TAHFIZ DARUL QURAN	4.5.2020	4.5.2020	5.5.2020	POSITIF				POSITIF
HS053	HS053	58	27/9/1962	Melayu	Male	Citizen	Lot 1175 Kampung Ulu Kalong 44300 Ulu Yam Bharu Selangor			Ulu Yam	Selangor									TAHFIZ AL KHOLIDI	4.5.2020	4.5.2020	5.5.2020	POSITIF				POSITIF
HS054	HS054	14	23/5/2006	Melayu	Male	Citizen	No 18, Jln Bunga Kertas 3c, Bukit Sentosa, Rawang, 48010 Hulu Selangor Selangor, Malaysia			Serendah	Selangor									TAHFIZ DARUL MUQAMAH LITAHFIZIL QURAN ULU KALONG	6.5.2020	6.5.2020	9.5.2020	POSITIF				POSITIF
HS055	HS055	9	19/10/2011	Melayu	Male	Citizen	No.105,Jalan Ros,Golf Club,Bandar Bukit Beruntung, Rawang, 48300 Hulu Selangor Selangor, Malaysia			Serendah	Selangor									TAHFIZ AL QURAN AL WALID	6.5.2020	6.5.2020	9.5.2020	POSITIF				POSITIF
HS056	HS056	21	1999-06-10	Melayu	Male	Citizen	Maahad Darul Atiq, Hulu Selangor Selangor, Malaysia	3.52314	101.633	Rasa	Selangor									TAHFIZ DARUL ATIQ	6.5.2020	6.5.2020	9.5.2020	POSITIF				POSITIF
HS057	HS057	20	29/12/1999	Melayu	Male	Citizen	Maahad Darul Atiq, Hulu Selangor Selangor, Malaysia	3.52314	101.633	Rasa	Selangor									TAHFIZ DARUL ATIQ	6.5.2020	6.5.2020	9.5.2020	POSITIF				POSITIF
HS058	HS058	17	17/3/2003	Melayu	Male	Citizen	No. 7, Jln Kemboja Sari 10, Bandar Sg Buaya, Hulu Selangor Selangor, Malaysia			Serendah	Selangor									TAHFIZ IMAM AS SHAFIE	6.5.2020	6.5.2020	9.5.2020	POSITIF				POSITIF
HS059	HS059	14	17/8/2006	Melayu	Female	Citizen	Maahad Darul Atiq, Hulu Selangor Selangor, Malaysia	3.52314	101.633	Rasa	Selangor									TAHFIZ DARUL ATIQ	6.5.2020	6.5.2020	9.5.2020	POSITIF				POSITIF
HS060	HS060	36	14/10/1984	Melayu	Male	Citizen	Bt 20 Pangsapuri Sri Kiambang, Jalan Tasik Teratai, Taman Tasik Teratai			Serendah	Selangor										18.5.2020	18.5.2020	19.5.2020	POSITIF				POSITIF
HS061	HS061	63	15/8/1957	Melayu	Male	Citizen	No 2A Jalan Widuri 3B, Seksyen BB18, Bukit Beruntung 3, 48300 Bukit Beruntung			Serendah	Selangor									mati	9.5.2020	9.5.2020	10.5.2020	POSITIF				POSITIF
HS062	HS062	49	15/12/1970	Melayu	Male	Citizen	13 Jalan 24, Taman Ampang Pecah , 44000 Kuala Kubu Bharu			Ampang Pecah	Selangor									RUMAH EHSAN	18.5.2020	18.5.2020	19.5.2020	POSITIF				POSITIF
HS063	HS063	55	1965-03-12	India	Female	Citizen	No 5, Jalan 3, Taman Damai Utama , Kuala Kubu Bharu, 44000 Kuala Kubu Bharu, Sel			Ampang Pecah	Selangor									RUMAH EHSAN	18.5.2020	18.5.2020	19.5.2020	POSITIF				POSITIF
HS064	HS064	20	22/3/2000	Orang Asli	Male	Citizen	Kg Tun Abdul Razak 44000 Kuala Kubu Bharu			Ampang Pecah	Selangor									RUMAH EHSAN	18.5.2020	18.5.2020	19.5.2020	POSITIF				POSITIF
HS065	HS065	39	1981-09-05	Orang Asli	Male	Citizen	N0. 3 Kg Orang Asli Sungai Jang 44100 Kerling Selangor			Kerling	Selangor									RUMAH EHSAN	18.5.2020	18.5.2020	19.5.2020	POSITIF				POSITIF
HS066	HS066	21	1999-08-07	Melayu	Male	Citizen	No 11 Jalan Kemboja 4A/9 Bukit Sentosa			Serendah	Selangor									UPSI	20.5.2020	20.5.2020	21.5.2020	POSITIF				POSITIF
HS067	HS067	40	31/7/1980	Cina	Male	Citizen	Persatuan Bantuan Keluarga Negeri Selangor, Ulu Yam,			Ulu Yam	Selangor									PUSAT BANTUAN KELUARGA NEGERI SELANGOR	20.5.2020	20.5.2020	21.5.2020	POSITIF				POSITIF
HS068	HS068	33	1987-04-04	Melayu	Male	Citizen	A6-07 Blok Melor, Maktab Pdrm 44000 Kuala Kubu Bharu Selangor	3.56322	101.65	Ampang Pecah	Selangor									RUMAH EHSAN KONTAK KHOLID	21.5.2020	21.5.2020	22.5.2020	POSITIF				POSITIF
HS069	HS069	41	1979-11-06	Orang Asli	Male	Citizen	17, Kg OA Tun Razak KKB			Ampang Pecah	Selangor									SARINGAN ORANG ASLI TUN RAZAK	21.5.2020	21.5.2020	22.5.2020	POSITIF				POSITIF
HS070	HS070	2	16/11/2018	Orang Asli	Female	Citizen	34 Kg OA Tun Razak KKB			Ampang Pecah	Selangor									SARINGAN ORANG ASLI TUN RAZAK	21.5.2020	21.5.2020	22.5.2020	POSITIF				POSITIF
HS071	HS071	41	14/4/1979	Orang Asli	Male	Citizen	No 45 Kg OA Tun Razak Kuala Kubu Bharu			Ampang Pecah	Selangor									SARINGAN ORANG ASLI TUN RAZAK	21.5.2020	21.5.2020	23.5.2020	POSITIF				POSITIF
HS072	HS072	64	21/6/1956	Orang Asli	Male	Citizen	No 18 Kg OA Tun Razak Kuala Kubu Bharu			Ampang Pecah	Selangor									SARINGAN ORANG ASLI TUN RAZAK	21.5.2020	21.5.2020	23.5.2020	POSITIF				POSITIF
HS073	HS073	16	13/2/2014	Orang Asli	Male	Citizen	No 32 Kg Orang Asli Tun Abdul Razak, Kuala Kubu Bharu,			Ampang Pecah	Selangor									SARINGAN ORANG ASLI TUN RAZAK	21.5.2020	21.5.2020	23.5.2020	POSITIF				POSITIF
HS074	HS074	8	13/10/2012	Orang Asli	Male	Citizen	No 36 Kg OA Tun Razak Kuala Kubu Bharu			Ampang Pecah	Selangor									SARINGAN ORANG ASLI TUN RAZAK	21.5.2020	21.5.2020	23.5.2020	POSITIF				POSITIF
HS075	HS075	16	18/9/2004	Melayu	Female	Citizen	B-1-3 Apartment Sri Kembangan			Serendah	Selangor									AKADEMI SYAHADAH	22.5.2020	22.5.2020	24.5.2020	POSITIF				POSITIF
HS076	HS076	18	23/8/2002	Melayu	Male	Citizen	No. 9, Jln Tempua 1B, Taman Tempua Bestari 44100 Kalumpang.			Kalumpang	Selangor									AKADEMI INTERGRASI TAHFIZ AL FALAH,	11.6.2020	11.6.2020	19.6.2020	POSITIF				POSITIF
hs1	hs1	53		Melayu	Male	Citizen	No 49, Jalan Melor 8, Desa Melor, 48200 Serendah, Selangor	3.35774	101.631		Selangor	Serendah		PEGAWAI KWSP SG BULOH (BHGN PEMBANGUNAN)	YES	2020-02-03	KELUARGA				09.03.2020	2020-02-03	2020-02-03	NEGATIF	2020-10-03	2020-10-03	NEGATIF	NEGATIF
hs10	hs10	39	14/11/1982	Melayu	Female	Citizen	NO 38, JALAN SP 8/22, BANDAR SAUJANA PUTRA, 42610 JENJARUM	2.93939	101.58		Selangor			STAFF UDA HOLDING (OFFICEMATE)	NO		SEKERJA					2020-06-03	2020-08-03	NEGATIF				NEGATIF
hs100	hs100	41	1980-12-10	Melayu	Male	Citizen	No. 27, Jln Kemboja 3, Seksyen Bb4, B.B / Sk Tbr 1	3.43369	101.57		Selangor						SEKERJA			DAERAH	23.03.2020	23.3.2020	27.3.2020	NEGATIF				NEGATIF
hs1000	hs1000	23	27/8/1998	Melayu	Male	Citizen	No.320-2, Kampung Raja, Felda Gedangsa	3.73558	101.382		Selangor				NO		SAUDARA			DAERAH	11.4.2020	10.4.2020	12.4.2020	NEGATIF				NEGATIF
hs1001	hs1001	19	16/9/2002	Melayu	Male	Citizen	No.320-2, Kampung Raja, Felda Gedangsa	3.73558	101.382		Selangor				NO		SAUDARA			DAERAH	11.4.2020	10.4.2020	12.4.2020	NEGATIF				NEGATIF
hs1002	hs1002	50	29/3/1971	Melayu	Female	Citizen	L-4-30, Apartment Kenanga TBR, Bukit Beruntung	3.43873	101.546		Selangor				NO		KELUARGA			DAERAH	11.4.2020	10.4.2020	12.4.2020	NEGATIF				NEGATIF
hs1003	hs1003	12	2009-01-09	Melayu	Female	Citizen	L-4-30, Apartment Kenanga TBR, Bukit Beruntung	3.43873	101.546		Selangor				NO		KELUARGA			DAERAH	11.4.2020	10.4.2020	12.4.2020	NEGATIF	13.4.2020		NEGATIF	NEGATIF
hs1004	hs1004	50	28/10/1971	Melayu	Male	Citizen	L-4-30, Apartment Kenanga TBR, Bukit Beruntung	3.43873	101.546		Selangor				NO		KELUARGA			DAERAH	11.4.2020	10.4.2020	12.4.2020	NEGATIF				NEGATIF
hs1005	hs1005	46	20/4/1975	Melayu	Female	Citizen	L-4-30, Apartment Kenanga TBR, Bukit Beruntung	3.43873	101.546		Selangor				NO		GURU MENGAJI			DAERAH	11.4.2020	10.4.2020	12.4.2020	NEGATIF				NEGATIF
hs1007	hs1007	8	2013-09-10	Melayu	Female	Citizen	C-2-29, Apartment Kenanga TBR, Bukit Beruntung	3.43873	101.546		Selangor						SEKOLAH			DAERAH	14.4.2020	13.4.2020	15.4.2020	NEGATIF				NEGATIF
hs1008	hs1008	8	2013-05-06	Melayu	Male	Citizen	G-2-13A, Apartment Dahlia TBR, Bukit Beruntung				Selangor						SEKOLAH			DAERAH	15.4.2020	14.4.2020	16.4.2020	NEGATIF				NEGATIF
hs1009	hs1009	8	28/11/2013	Melayu	Female	Citizen	J-2-06, Apartment Dahlia TBR, Bukit Beruntung	3.43071	101.562		Selangor						SEKOLAH			DAERAH	14.4.2020	13.4.2020	15.4.2020	NEGATIF				NEGATIF
hs101	hs101	50	1971-08-01	Melayu	Female	Citizen	SK Taman Bunga Raya 1	3.43862	101.551		Selangor									DAERAH	28.03.2020	25.3.2020	2020-02-04	NEGATIF				NEGATIF
hs1010	hs1010	8	13/10/2013	Melayu	Female	Citizen	J-2-06, Apartment Dahlia TBR, Bukit Beruntung	3.43071	101.562		Selangor						SEKOLAH			DAERAH	14.4.2020	13.4.2020	15.4.2020	NEGATIF				NEGATIF
hs1011	hs1011	8	16/3/2013	Melayu	Male	Citizen	No.18, Jalan Inai 4, Bukit Beruntung	3.43055	101.559		Selangor						SEKOLAH			DAERAH	14.4.2020	13.4.2020	15.4.2020	NEGATIF				NEGATIF
hs1012	hs1012	8	27/7/2013	Melayu	Male	Citizen	D-2-23, Apartment Kenanga TBR, Bukit Beruntung	3.44077	101.552		Selangor						SEKOLAH			DAERAH	14.4.2020	13.4.2020	15.4.2020	NEGATIF				NEGATIF
hs1013	hs1013	17	2004-05-01	Melayu	Male	Citizen	No.15, Jalan Seroja 1, Bukit Beruntung	3.41833	101.568		Selangor				NO		KELUARGA			DAERAH	14.4.2020	13.4.2020	15.4.2020	NEGATIF				NEGATIF
hs1014	hs1014	8	19/9/2013	Melayu	Male	Citizen	N-1-40, Apartment Kenanga TBR, Bukit Beruntung	3.42439	101.557		Selangor						KELUARGA			DAERAH	14.4.2020	13.4.2020	15.4.2020	NEGATIF				NEGATIF
hs1015	hs1015	13	2008-04-06	Melayu	Female	Citizen	No.15, Jalan Seroja 1, Bukit Beruntung	3.41833	101.568		Selangor				NO		KELUARGA			DAERAH	14.4.2020	13.4.2020	15.4.2020	NEGATIF				NEGATIF
hs1016	hs1016	43	28/5/1978	Melayu	Male	Citizen	No.15, Jalan Seroja 1, Bukit Beruntung	3.41833	101.568		Selangor				NO		KELUARGA			DAERAH	14.4.2020	13.4.2020	15.4.2020	NEGATIF				NEGATIF
hs1017	hs1017	8	17/8/2013	Melayu	Female	Citizen	C-2-2, Apartment Mawar TBR, Bukit Beruntung	3.44466	101.546		Selangor						SEKOLAH			DAERAH	14.4.2020	13.4.2020	15.4.2020	NEGATIF				NEGATIF
hs1018	hs1018	8	2013-11-02	Melayu	Female	Citizen	A-3-03, Apartment Cempaka TBR, Bukit Beruntung	3.43794	101.548		Selangor						SEKOLAH			DAERAH	14.4.2020	13.4.2020	15.4.2020	NEGATIF				NEGATIF
hs1019	hs1019	8	31/5/2013	Melayu	Female	Citizen	L-2-1, Apartment Kenanga TBR, Bukit Beruntung	3.43589	101.544		Selangor						SEKOLAH			DAERAH	14.4.2020	13.4.2020	15.4.2020	NEGATIF				NEGATIF
hs102	hs102	43	30/10/1978	Melayu	Female	Citizen	No. 2/B, Jln 2, Tmn Seri Btg Kali	3.47578	101.64		Selangor									DAERAH	25.03.2020	24.3.2020	31.3.2020	NEGATIF				NEGATIF
hs1020	hs1020	8	14/9/2013	Melayu	Male	Citizen	C-1-09, Apartment Kenanga TBR, Bukit Beruntung	3.43873	101.546		Selangor						SEKOLAH			DAERAH	14.4.2020	13.4.2020	15.4.2020	NEGATIF				NEGATIF
hs1021	hs1021	8	2013-12-03	Melayu	Male	Citizen	H-1-14, Apartment Ke4nanga TBR, Bukit Beruntung	3.42439	101.557		Selangor						SEKOLAH			DAERAH	14.4.2020	13.4.2020	15.4.2020	NEGATIF				NEGATIF
hs1022	hs1022	8	24/2/2013	Melayu	Male	Citizen	M-G-06, Apartment Dahlia, Jalan Bunga Raya, Bukit Beruntung	3.43757	101.548		Selangor						SEKOLAH			DAERAH	14.4.2020	13.4.2020	15.4.2020	NEGATIF				NEGATIF
hs1023	hs1023	8	15/5/2013	Melayu	Female	Citizen	A-1-43, Apartment Kenanga TBR, Bukit Beruntung	3.42439	101.557		Selangor				NO		SEKOLAH			DAERAH	14.4.2020	13.4.2020	15.4.2020	NEGATIF				NEGATIF
hs1024	hs1024	8	17/6/2013	Melayu	Male	Citizen	B-2-2, Apartment Cempaka TBR, Bukit Beruntung	3.43794	101.548		Selangor						SEKOLAH			DAERAH	14.4.2020	13.4.2020	15.4.2020	NEGATIF				NEGATIF
hs1025	hs1025	8	2013-03-04	Melayu	Male	Citizen	7-26, Apartment Cempaka TBR, Bukit Beruntung	3.43794	101.548		Selangor						SEKOLAH			DAERAH	14.4.2020	13.4.2020	15.4.2020	NEGATIF				NEGATIF
hs1026	hs1026	8	22/2/2013	Melayu	Female	Citizen	M-1-10, Apartment Kenanga TBR, Bukit Beruntung	3.43873	101.546		Selangor						SEKOLAH			DAERAH	14.4.2020	13.4.2020	15.4.2020	NEGATIF				NEGATIF
hs1027	hs1027	8	21/4/2013	Melayu	Female	Citizen	N-G-11, Apartment Dahlia TBR, Bukit Beruntung	3.43071	101.562		Selangor						SEKOLAH			DAERAH	14.4.2020	13.4.2020	15.4.2020	NEGATIF				NEGATIF
hs1028	hs1028	8	23/6/2013	Melayu	Male	Citizen	No.11, Jalan Kelana 4B, Bukit Beruntung	3.42439	101.557		Selangor						SEKOLAH			DAERAH	14.4.2020	13.4.2020	15.4.2020	NEGATIF				NEGATIF
hs1029	hs1029	15	19/5/2006	Melayu	Male	Citizen	No.15, Jalan Seroja 1, Bukit Beruntung	3.41833	101.568		Selangor				NO		KELUARGA			DAERAH	14.4.2020	13.4.2020	15.4.2020	NEGATIF				NEGATIF
hs103	hs103	8	2013-09-09	Melayu	Male	Citizen	J-1-18 Apt Dahlia, Taman Bunga Raya, Bukit Beruntung	3.43071	101.562		Selangor									DAERAH	25.03.2020	25.3.2020	2020-02-04	NEGATIF				NEGATIF
hs1030	hs1030	8	24/10/2013	Melayu	Female	Citizen	B-1-9, Apartment Mawar TBR, Bukit Beruntung	3.44466	101.546		Selangor						SEKOLAH			DAERAH	15.4.2020	14.4.2020	16.4.2020	NEGATIF				NEGATIF
hs1031	hs1031	8	2013-06-01	Melayu	Female	Citizen	No.22, Jalan Anggerik 13, Bukit Beruntung	3.43251	101.572		Selangor						SEKOLAH			DAERAH	15.4.2020	14.4.2020	16.4.2020	NEGATIF				NEGATIF
hs1032	hs1032	8	20/3/2013	Melayu	Female	Citizen	A-1-33, Apartment Dahlia TBR, Bukit Beruntung	3.43071	101.562		Selangor						SEKOLAH			DAERAH	15.4.2020	14.4.2020	16.4.2020	NEGATIF				NEGATIF
hs1033	hs1033	8	15/6/2013	Melayu	Male	Citizen	G-1-05, Apartment Dahlia TBR, Bukit Beruntung	3.43071	101.562		Selangor						SEKOLAH			DAERAH	15.4.2020	14.4.2020	16.4.2020	NEGATIF				NEGATIF
hs1034	hs1034	8	16/5/2013	Orang Asli	Male	Citizen	No.31, Jalan Tanjung 2, Bukit Sentosa	3.39898	101.566		Selangor						SEKOLAH			DAERAH	15.4.2020	14.4.2020	16.4.2020	NEGATIF				NEGATIF
hs1035	hs1035	8	16/3/2013	Melayu	Male	Citizen	M-1-37, Apartment Dahlia TBR, Bukit Beruntung	3.43071	101.562		Selangor						SEKOLAH			DAERAH	15.4.2020	14.4.2020	16.4.2020	NEGATIF				NEGATIF
hs1036	hs1036	8	2013-02-07	Melayu	Male	Citizen	R-1-13, Apartment Dahlia TBR, Bukit Beruntung	3.42439	101.557		Selangor						SEKOLAH			DAERAH	15.4.2020	14.4.2020	16.4.2020	NEGATIF				NEGATIF
hs1037	hs1037	8	24/10/2013	Melayu	Female	Citizen	D-G-2, Apartment Buginvilla TBR, Bukit Beruntung	3.43891	101.547		Selangor						SEKOLAH			DAERAH	15.4.2020	14.4.2020	16.4.2020	NEGATIF				NEGATIF
hs1038	hs1038	8	18/7/2013	Melayu	Female	Citizen	F-2-08, Apartment Mawar TBR, Bukit Beruntung	3.44466	101.546		Selangor						SEKOLAH			DAERAH	15.4.2020	14.4.2020	16.4.2020	NEGATIF				NEGATIF
hs1039	hs1039	8	17/6/2013	Melayu	Male	Citizen	D-2-14, Apartment Kenanga TBR, Bukit Beruntung	3.43349	101.564		Selangor						SEKOLAH			DAERAH	15.4.2020	14.4.2020	16.4.2020	NEGATIF				NEGATIF
hs104	hs104	28	30/9/1993	Melayu	Female	Citizen	No. 29, Jalan Kemboja 4A/1, Tmn Bukit Sentosa 3	3.41809	101.594		Selangor									DAERAH	25.3.2020	24.3.2020	25.3.2020	NEGATIF				NEGATIF
hs1040	hs1040	8	28/2/2013	Melayu	Male	Citizen	No.13, Jalan Adenium 5A/12, Bukit Beruntung	3.42321	101.552		Selangor						SEKOLAH			DAERAH	15.4.2020	14.4.2020	16.4.2020	NEGATIF				NEGATIF
hs1041	hs1041	8	26/11/2013	Melayu	Female	Citizen	J-2-17, Apartment Kenanga TBR, Bukit Beruntung	3.43873	101.546		Selangor						SEKOLAH			DAERAH	15.4.2020	14.4.2020	16.4.2020	NEGATIF				NEGATIF
hs1042	hs1042	8	2013-11-01	Melayu	Male	Citizen	A-1-06, Apartment Dahlia TBR, Bukit Beruntung	3.43071	101.562		Selangor						SEKOLAH			DAERAH	15.4.2020	14.4.2020	16.4.2020	NEGATIF				NEGATIF
hs1043	hs1043	8	14/10/2013	Melayu	Female	Citizen	G-2-19, Apartment Dahlia TBR, Bukit Beruntung	3.43071	101.562		Selangor						SEKOLAH			DAERAH	15.4.2020	14.4.2020	16.4.2020	NEGATIF				NEGATIF
hs1044	hs1044	8	21/4/2013	Melayu	Male	Citizen	D-3-17, Apartment Kemuning TBR, Bukit Beruntung	3.44477	101.553		Selangor						SEKOLAH			DAERAH	15.4.2020	14.4.2020	16.4.2020	NEGATIF				NEGATIF
hs1045	hs1045	8	2013-11-08	Melayu	Male	Citizen	D-1-01, Apartment Mawar TBR, Bukit Beruntung	3.4302	101.562		Selangor						SEKOLAH			DAERAH	16.4.2020	15.4.2020	17.4.2020	NEGATIF				NEGATIF
hs1046	hs1046	8	2013-04-12	Melayu	Male	Citizen	P-2-11, Apartment Dahlia TBR, Bukit Beruntung	3.43071	101.562		Selangor						SEKOLAH			DAERAH	16.4.2020	15.4.2020	17.4.2020	NEGATIF				NEGATIF
hs1047	hs1047	8	13/11/2013	Melayu	Female	Citizen	D-3-3, Apartment Mawar TBR, Bukit Beruntung	3.44466	101.546		Selangor						SEKOLAH			DAERAH	16.4.2020	15.4.2020	17.4.2020	NEGATIF				NEGATIF
hs1048	hs1048	8	2013-02-07	Melayu	Male	Citizen	L-1-15, Apartment Dahlia TBR, Bukit Beruntung	3.43071	101.562		Selangor						SEKOLAH			DAERAH	16.4.2020	15.4.2020	17.4.2020	NEGATIF				NEGATIF
hs1049	hs1049	8	2013-07-10	Melayu	Male	Citizen	K-2-15, Apartment Dahlia TBR, Bukit Beruntung	3.43071	101.562		Selangor						SEKOLAH			DAERAH	16.4.2020	15.4.2020	17.4.2020	NEGATIF				NEGATIF
hs105	hs105	27	1994-05-08	Melayu	Female	Citizen	No. 11 Jalan Kasturi 4C Seksyen BB8, Bukit Beruntung	3.40549	101.572		Selangor						ANAK			DAERAH	25.3.2020	25.3.2020	31.3.2020	NEGATIF				NEGATIF
hs1050	hs1050	8	17/10/2013	Melayu	Male	Citizen	E-3-48, Apartment Kenanga TBR, Bukit Beruntung	3.43873	101.546		Selangor						SEKOLAH			DAERAH	16.4.2020	15.4.2020	17.4.2020	NEGATIF				NEGATIF
hs1051	hs1051	8	2013-06-11	Melayu	Male	Citizen	N-G-09, Apartment Dahlia TBR, Bukit Beruntung				Selangor						SEKOLAH			DAERAH	16.4.2020	15.4.2020	17.4.2020	NEGATIF				NEGATIF
hs1052	hs1052	8	14/1/2013	Melayu	Male	Citizen	K-2-38, Apartment Kenanga TBR, Bukit Beruntung	3.43349	101.564		Selangor						SEKOLAH			DAERAH	16.4.2020	15.4.2020	17.4.2020	NEGATIF				NEGATIF
hs1053	hs1053	8	14/1/2013	Melayu	Male	Citizen	K-2-38, Apartment Kenanga TBR, Bukit Beruntung	3.43349	101.564		Selangor						SEKOLAH			DAERAH	16.4.2020	15.4.2020	17.4.2020	NEGATIF				NEGATIF
hs1054	hs1054	7	26/12/2013	Melayu	Male	Citizen	L-2-5, Apartment Kenanga TBR, Bukit Beruntung	3.43349	101.564		Selangor						SEKOLAH			DAERAH	16.4.2020	15.4.2020	17.4.2020	NEGATIF				NEGATIF
hs1055	hs1055	8	2013-12-06	Melayu	Male	Citizen	E-2-11, Apartment Kenanga TBR, Bukit Beruntung	3.44077	101.552		Selangor						SEKOLAH			DAERAH	16.4.2020	15.4.2020	17.4.2020	NEGATIF				NEGATIF
hs1056	hs1056	8	2013-09-09	Melayu	Male	Citizen	E-1-37, Aparment Kenanga TBR, Bukit Beruntung	3.42439	101.557		Selangor						SEKOLAH			DAERAH	16.4.2020	15.4.2020	17.4.2020	NEGATIF				NEGATIF
hs1057	hs1057	8	2013-02-07	Melayu	Male	Citizen	A-1-16, Apartment Dahlia TBR, Bukit Beruntung	3.43071	101.562		Selangor						SEKOLAH			DAERAH	16.4.2020	15.4.2020	17.4.2020	NEGATIF				NEGATIF
hs1058	hs1058	8	2013-08-10	Melayu	Female	Citizen	A-2-16, Apartment Kenanga TBR, Bukit Beruntung	3.43349	101.564		Selangor						SEKOLAH			DAERAH	16.4.2020	15.4.2020	17.4.2020	NEGATIF				NEGATIF
hs1059	hs1059	8	2013-01-04	Melayu	Female	Citizen	N-2-13, Apartment Kenanga TBR, Bukit Beruntung	3.44077	101.552		Selangor						SEKOLAH			DAERAH	16.4.2020	15.4.2020	17.4.2020	NEGATIF				NEGATIF
hs106	hs106	29	1992-05-11	Melayu	Male	Citizen	No. 11 Jln Kasturi 4c, Bukit Beruntung	3.40549	101.572		Selangor									DAERAH	26.3.2020	25.3.2020	31.3.2020	NEGATIF				NEGATIF
hs1060	hs1060	8	19/3/2013	Melayu	Female	Citizen	L-1-31, Apartment Teratai TBR, Bukmit Beruntung	3.44452	101.554		Selangor						SEKOLAH			DAERAH	16.4.2020	15.4.2020	17.4.2020	NEGATIF				NEGATIF
hs1061	hs1061	8	14/3/2013	Melayu	Female	Citizen	No.3, Jalan bakawali 2A, Bukit Sentosa	3.41001	101.601		Selangor						SEKOLAH			DAERAH	16.4.2020	15.4.2020	17.4.2020	NEGATIF				NEGATIF
hs1062	hs1062	8	16/7/2013	Melayu	Female	Citizen	D-7-9, Apartment Buginvillah TBR, Bukit Beruntung	3.43891	101.547		Selangor						SEKOLAH			DAERAH	16.4.2020	15.4.2020	17.4.2020	NEGATIF				NEGATIF
hs1063	hs1063	8	27/3/2013	Melayu	Female	Citizen	J-2-09, Apartment Dahlia TBR, Bukit Beruntung	3.43071	101.562		Selangor						SEKOLAH			DAERAH	16.4.2020	15.4.2020	17.4.2020	NEGATIF				NEGATIF
hs1064	hs1064	8	2013-10-03	Melayu	Female	Citizen	No.11, Jalan Kemboja 5A/3, Bukit Sentosa	3.41639	101.597		Selangor						SEKOLAH			DAERAH	16.4.2020	15.4.2020	17.4.2020	NEGATIF				NEGATIF
hs1065	hs1065	8	15/11/2013	Melayu	Female	Citizen	M-G-27, Apartment Anggerik TBR, Bukit Beruntung	3.44636	101.547		Selangor						SEKOLAH			DAERAH	16.4.2020	15.4.2020	17.4.2020	NEGATIF				NEGATIF
hs1066	hs1066	8	20/6/2013	Melayu	Male	Citizen	D-G-3A, Apartment Cempaka TBR, Bukit Beruntung	3.43794	101.548		Selangor						SEKOLAH			DAERAH	17.4.2020	16.4.2020	17.4.2020	NEGATIF				NEGATIF
hs1067	hs1067	8	29/5/2013	Melayu	Male	Citizen	H-4-42, Apartment Kenanga TBR, Bukit Beruntung	3.43349	101.564		Selangor						SEKOLAH			DAERAH	18.4.2020	17.4.2020	19.4.2020	NEGATIF				NEGATIF
hs1068	hs1068	8	2013-05-11	Melayu	Male	Citizen	NO. 55, JALAN INAI 4, BUKIT BERUNTUNG 48300 RAWANG	3.43029	101.56		Selangor						SEKOLAH							NEGATIF				NEGATIF
hs1069	hs1069	8	24/7/2013	Melayu	Male	Citizen	H-4-02 APT CEMPAKA PERSIARAN BUNGA RAYA TMN BUNGA RAYA BKT BERUNTUNG 48300 RAWANG	3.43794	101.548		Selangor						SEKOLAH							NEGATIF				NEGATIF
hs107	hs107	56	14/5/1965	Melayu	Female	Citizen	Blok M 118, Danau Apt Taman Valencia, Sg Buloh	3.21384	101.583		Selangor									DAERAH	27.3.2020	26.3.2020	4.4.2020	NEGATIF				NEGATIF
hs1070	hs1070	8	29/8/2013	Melayu	Male	Citizen	N-LG-7 APARTMENT DAHLIA TAMAN BUNGA RAYA BUKIT BERUNTUNG 48300 RAWANG	3.43757	101.548		Selangor						SEKOLAH							NEGATIF				NEGATIF
hs1071	hs1071	8	2013-01-12	Melayu	Female	Citizen	C-G-07 APARTMENT CEMPAKA TAMAN BUNGA RAYA BUKIT BERUNTUNG 48300 RAWANG	3.43794	101.548		Selangor						SEKOLAH							NEGATIF				NEGATIF
hs1072	hs1072	8	2013-05-06	Melayu	Female	Citizen	P-01-04 APARTMENT KENANGA PERSIARAN TAMAN BUNGA RAYA 48300 BUKIT BERUNTUNG 48300 RAWANG	3.43873	101.546		Selangor						SEKOLAH							NEGATIF				NEGATIF
hs1073	hs1073	8	24/4/2013	Melayu	Female	Citizen	N-G-15 APT DAHLIA TMN BUNGA RAYA BUKIT BERUNTUNG 48300 RAWANG	3.43757	101.548		Selangor						SEKOLAH							NEGATIF				NEGATIF
hs1074	hs1074	8	19/7/2013	Melayu	Male	Citizen	APT CEMPAKA, BLOK C-05-08, TAMAN BUNGA RAYA BUKIT BERUNTUNG 48300 RAWANG	3.43939	101.55		Selangor						SEKOLAH							NEGATIF				NEGATIF
hs1075	hs1075	8	25/7/2013	Melayu	Male	Citizen	L-G-11, APARTMEN DAHLIA TAMAN BUNGA RAYA BUKIT BERUNTUNG 48300 RAWANG	3.43799	101.551		Selangor						SEKOLAH							NEGATIF				NEGATIF
hs1076	hs1076	8	2013-08-04	Melayu	Male	Citizen	A-1-8, Apartment Mawar Jalan Bunga Raya 1 Taman Bunga Raya, Bukit Beruntung 48300 RAWANG	3.44466	101.546		Selangor						SEKOLAH							NEGATIF				NEGATIF
hs1077	hs1077	7	18/12/2013	Melayu	Male	Citizen	B-LG02-APARTMENT DAHLIA TAMAN BUNGA RAYA BUKIT BERUNTUNG 48300 RAWANG	3.43757	101.548		Selangor						SEKOLAH							NEGATIF				NEGATIF
hs1078	hs1078	8	28/10/2013	Melayu	Male	Citizen	P-G-19 APARTMENT DAHLIA TAMAN BUNGA RAYA 1 BUKIT BERUNTUNG 48300 RAWANG	3.43757	101.548		Selangor						SEKOLAH							NEGATIF				NEGATIF
hs1079	hs1079	8	18/7/2013	Melayu	Female	Citizen	C-4-24, APT KENANGA TAMAN BUNGA RAYA BUKIT BERUNTUNG 48300 RAWANG	3.43873	101.546		Selangor						SEKOLAH							NEGATIF				NEGATIF
hs108	hs108	43	1978-01-06	Melayu	Female	Citizen	No 3-03, Quarters HKKB				Selangor									DAERAH	27.3.2020	27.3.2020	3.4.2020	NEGATIF				NEGATIF
hs1080	hs1080	8	2013-07-10	Melayu	Female	Citizen	NO 47 JALAN MAWAR 1 BUKIT BERUNTUNG RAWANG 48300 RAWANG	3.43017	101.553		Selangor						SEKOLAH							NEGATIF				NEGATIF
hs1081	hs1081	8	28/5/2013	Melayu	Male	Citizen	BLOK B-LG-03, APARTMENT DAHLIA TAMAN BUNGA RAYA BUKIT BERUNTUNG 48300 RAWANG	3.43757	101.548		Selangor						SEKOLAH							NEGATIF				NEGATIF
hs1082	hs1082	8	2013-01-05	Melayu	Male	Citizen	NO 29 48300 RAWANG	3.41935	101.582		Selangor						SEKOLAH							NEGATIF				NEGATIF
hs1083	hs1083	8	14/4/2013	Melayu	Male	Citizen	BLOK A-2-10 APT CEMPAKA JALAN BUNGA RAYA 1 TAMAN BUNGA RAYA BUKIT BERUNTUNG 48300 Rawang	3.43794	101.548		Selangor						SEKOLAH							NEGATIF				NEGATIF
hs1084	hs1084	21	20/3/2000	Melayu	Male	Citizen	Maahad Al-Mustafa Hulu Tamu 44300 Batang Kali	3.46217	101.703		Selangor									TABLIGH	15.4.2020	14.4.2020	16.4.2020	NEGATIF				NEGATIF
hs1085	hs1085	23	21/6/1998	Melayu	Male	Citizen	Maahad Al-Mustafa Hulu Tamu 44300 Batang Kali	3.46217	101.703		Selangor									TABLIGH	15.4.2020	14.4.2020	16.4.2020	NEGATIF				NEGATIF
hs1086	hs1086	22	16/4/1999	Melayu	Male	Citizen	Maahad Al-Mustafa Hulu Tamu 44300 Batang Kali	3.46217	101.703		Selangor									TABLIGH	15.4.2020	14.4.2020	16.4.2020	NEGATIF				NEGATIF
hs1087	hs1087	23	23/8/1998	Melayu	Male	Citizen	Maahad Al-Mustafa Hulu Tamu 44300 Batang Kali	3.46217	101.703		Selangor									TABLIGH	15.4.2020	14.4.2020	16.4.2020	NEGATIF				NEGATIF
hs1088	hs1088	23	25/3/1998	Melayu	Male	Citizen	B-1-3, Institusi Pendidikan SMK Gedangsa	3.73307	101.384		Selangor									TABLIGH	15.4.2020	14.4.2020	16.4.2020	NEGATIF				NEGATIF
hs1089	hs1089	21	2000-05-06	Melayu	Male	Citizen	23c, Jalan Tangki Air, Felda Soeharto	3.69033	101.379		Selangor									TABLIGH	15.4.2020	14.4.2020	16.4.2020	NEGATIF				NEGATIF
hs109	hs109	42	1979-03-08	Melayu	Female	Citizen	SK Taman Bunga Raya 1	3.43862	101.551		Selangor									DAERAH	28.3.2020	25.3.2020	2020-02-04	NEGATIF				NEGATIF
hs1090	hs1090	21	2000-03-07	Melayu	Male	Citizen	Maahad Al-Mustafa Hulu Tamu 44300 Batang Kali	3.46217	101.703		Selangor				NO		SEKOLAH			TABLIGH	13.3.2020			NEGATIF				NEGATIF
hs1091	hs1091	22	1999-11-03	Melayu	Male	Citizen	Maahad Al-Mustafa Hulu Tamu 44300 Batang Kali	3.46217	101.703		Selangor				NO		SEKOLAH			TABLIGH	13.3.2020			NEGATIF				NEGATIF
hs1092	hs1092	36	1985-10-03	Melayu	Male	Citizen	BLOK 1-11-16, JLN PUCHONG UTAMA 6, TMN PUCHONG UTAMA, 47140 PUCHONG SELANGOR	3.00158	101.609		Selangor				NO		KELUARGA							NEGATIF				NEGATIF
hs1093	hs1093	33	25/5/1988	Melayu	Female	Citizen	BLOK 1-11-16, JLN PUCHONG UTAMA 6, TMN PUCHONG UTAMA, 47140 PUCHONG SELANGOR	3.00158	101.609		Selangor				NO		KELUARGA							NEGATIF				NEGATIF
hs1094	hs1094	25	15/4/1996	Melayu	Male	Citizen	BLOK 1-11-16, JLN PUCHONG UTAMA 6, TMN PUCHONG UTAMA, 47140 PUCHONG SELANGOR	3.00158	101.609		Selangor				NO		KELUARGA							NEGATIF				NEGATIF
hs1095	hs1095	7	2014-09-08	Melayu	Male	Citizen	BLOK 1-11-16, JLN PUCHONG UTAMA 6, TMN PUCHONG UTAMA, 47140 PUCHONG SELANGOR	3.00158	101.609		Selangor				NO		KELUARGA							NEGATIF				NEGATIF
hs1096	hs1096	5	20/4/2016	Melayu	Male	Citizen	BLOK 1-11-16, JLN PUCHONG UTAMA 6, TMN PUCHONG UTAMA, 47140 PUCHONG SELANGOR	3.00158	101.609		Selangor				NO		KELUARGA							NEGATIF				NEGATIF
hs1097	hs1097	22	1999-10-08	Melayu	Male	Citizen	MAAHAD AL MUSTHOFA, HULU TAMU M-261 KG MELAYU KULAI, 81000 KULAI JOHOR	3.5601	101.658		Selangor				YES		SEKOLAH							NEGATIF				NEGATIF
hs1098	hs1098	2	18/3/2019	Melayu	Male	Citizen	A-1-28, Apartment Dahlia TBR, Bukit Beruntung	3.43071	101.562		Selangor				NO		KELUARGA			DAERAH	18.4.2020	17.4.2020	19.4.2020	NEGATIF				NEGATIF
hs1099	hs1099	12	13/5/2009	Melayu	Male	Citizen	A-1-28, Apartment Dahlia TBR, Bukit Beruntung	3.43071	101.562		Selangor				NO		KELUARGA			DAERAH	18.4.2020	17.4.2020	19.4.2020	NEGATIF				NEGATIF
hs11	hs11	36	14/9/1985	Melayu	Female	Citizen	283 D KEM 9, LORONG BUNGA RAYA 3, KG BERJUNTAI BESTARI, 45600, BTG BERJUNTAI, SELANGOR	3.13367	101.336		Selangor			STAFF UDA HOLDING (OFFICEMATE)	NO		SEKERJA					2020-06-03	2020-08-03	NEGATIF				NEGATIF
hs110	hs110	43	1978-08-07	Melayu	Female	Citizen	SK Taman Bunga Raya 1	3.43862	101.551		Selangor									DAERAH	28.3.2020	25.3.2020	2020-02-04	NEGATIF				NEGATIF
hs1100	hs1100	15	2006-05-02	Melayu	Male	Citizen	A-1-28, Apartment Dahlia TBR, Bukit Beruntung	3.43071	101.562		Selangor				NO		KELUARGA			DAERAH	18.4.2020	17.4.2020	19.4.2020	NEGATIF				NEGATIF
hs1101	hs1101	17	13/6/2004	Melayu	Male	Citizen	A-1-28, Apartment Dahlia TBR, Bukit Beruntung	3.43071	101.562		Selangor				NO		KELUARGA			DAERAH	18.4.2020	17.4.2020	19.4.2020	NEGATIF				NEGATIF
hs1102	hs1102	43	1978-06-02	Melayu	Female	Citizen	A-1-28, Apartment Dahlia TBR, Bukit Beruntung	3.43071	101.562		Selangor				NO		KELUARGA			DAERAH	18.4.2020	17.4.2020	19.4.2020	NEGATIF	21.4.2020	23.4.2020	NEGATIF	NEGATIF
hs1103	hs1103	45	1976-08-08	Melayu	Male	Citizen	A-1-28, Apartment Dahlia TBR, Bukit Beruntung	3.43071	101.562		Selangor				NO		KELUARGA			DAERAH	18.4.2020	17.4.2020	19.4.2020	NEGATIF				NEGATIF
hs1104	hs1104	10	2011-08-06	Melayu	Male	Citizen	A-1-28 Apartment Dahlia Taman Bunga Raya,Jln Bunga Raya 1, Bukit Beruntung 48300 Rawang	3.43757	101.548		Selangor				NO		KELUARGA					1.4.2020	2.4.2020	NEGATIF	16.4.2020	19.4.2020	NEGATIF	NEGATIF
hs1105	hs1105	28	26/7/1993	Melayu	Female	Citizen	Q-1-13A, Apartment Dahlia 48300 Rawang				Selangor				NO		KELUARGA			DAERAH	12.4.2020	11.4.2020	19.4.2020	NEGATIF				NEGATIF
hs1106	hs1106	41	1980-05-08	Melayu	Male	Citizen	Q-G-03 Apartment Dahlia Taman Bunga Raya Bukit Beruntung 48300 Rawang	3.43757	101.548		Selangor				NO		KELUARGA			DAERAH	12.4.2020	11.4.2020	11.4.2020	NEGATIF	13.4.2020	13.4.2020	NEGATIF	NEGATIF
hs1107	hs1107	33	27/2/1988	Melayu	Female	Citizen	No 29 Jalan Anggerik 5G/1 Sek Bukit Sentosa 7	3.39846	101.568		Selangor									DAERAH	12.4.2020	10.4.2020	10.4.2020	NEGATIF	27.3.2020	31.3.2020	NEGATIF	NEGATIF
hs1108	hs1108	28	27/11/1993	Melayu	Female	Citizen	NO 4, JALAN MAWAR 3C/1, PRIMA BERUNTUNG, 48300 BUKIT BERUNTUNG, SELANGOR	3.39906	101.543		Selangor				NO		SEKERJA							NEGATIF				NEGATIF
hs1109	hs1109	27	1994-06-08	Melayu	Female	Citizen	NO 5, LOT 3055, LORONG RAHIDIN 2, PAYA JARAS DALAM, 47000 SG BULOH, SELANGOR	3.19572	101.55		Selangor				YES		SEKERJA							NEGATIF				NEGATIF
hs111	hs111	41	27/10/1980	Melayu	Female	Citizen	SK Taman Bunga Raya 1	3.43862	101.551		Selangor									DAERAH	28.3.2020	25.3.2020	2020-02-04	NEGATIF				NEGATIF
hs1110	hs1110	27	1994-05-03	Melayu	Female	Citizen	M2-2-7,DANAU SERI APT, JALAN REBUNG UTAMA, 47000 SG BULOH, SELANGOR	3.21384	101.583		Selangor				NO		SEKERJA							NEGATIF				NEGATIF
hs1111	hs1111	27	27/1/1994	Melayu	Female	Citizen	M2-2-7,DANAU SERI APT, JALAN REBUNG UTAMA, 47000 SG BULOH, SELANGOR	3.21384	101.583		Selangor				NO		SEKERJA							NEGATIF				NEGATIF
hs1112	hs1112	30	1991-07-06	Melayu	Female	Citizen	L1-5-8, PANGSAPURI DANAU BAYU, JALAN REBUNG UTAMA, 47000 SG BULOH, SELANGOR	3.21478	101.583		Selangor				NO		SEKERJA							NEGATIF				NEGATIF
hs1113	hs1113	26	1995-10-02	Melayu	Female	Citizen	LOT 118-6, BATU 13 KAMPUNG MELAYU, 47000 SG BULOH, SELANGOR	3.21911	101.573		Selangor				YES		SEKERJA							NEGATIF				NEGATIF
hs1114	hs1114	33	17/12/1987	Melayu	Female	Citizen	LOT 118, BATU 13 KAMPUNG MELAYU, 47000 SG BULOH, SELANGOR	3.22282	101.57		Selangor				YES		SEKERJA							NEGATIF				NEGATIF
hs1115	hs1115	31	13/7/1990	Melayu	Female	Citizen	F-G-17, APT IMPIAN, JLN PJU10/1F, DAMANSARA DAMAI, PETALING JAYA, SELANGOR	3.19133	101.587		Selangor				NO		SEKERJA							NEGATIF				NEGATIF
hs1116	hs1116	36	1985-06-11	Melayu	Female	Citizen	NO 36, 3/13 JLN TPS TAMAN PELANGI SEMENYIH, 43500 SEMENYIH, SELANGOR	2.93203	101.856		Selangor				YES		SEKERJA							NEGATIF				NEGATIF
hs1117	hs1117	31	28/10/1990	India	Female	Citizen	NO 6, JALAN KE 5/6, KOTA EMERALD (CORAL), 48300 RAWANG, SELANGOR	3.32111	101.555		Selangor				YES		SEKERJA							NEGATIF				NEGATIF
hs1118	hs1118	65	27/6/1956	India	Female	Citizen	No 36 Jalan Cempaka 6, Taman Cempaka Serendah	3.37005	101.613		Selangor				NO		KELUARGA			DAERAH	28.4.2020	27.4.2020	29.4.2020	NEGATIF	1.5.2020	1.5.2020	NEGATIF	NEGATIF
hs1119	hs1119	70	14/8/1951	India	Male	Citizen	No 36 Jalan Cempaka 6, Taman Cempaka Serendah	3.37005	101.613		Selangor				NO		KELUARGA			DAERAH	28.4.2020	27.4.2020	29.4.2020	NEGATIF	1.5.2020	1.5.2020	NEGATIF	NEGATIF
hs112	hs112	54	21/6/1967	Melayu	Female	Citizen	SK Taman Bunga Raya 1	3.43862	101.551		Selangor									DAERAH	28.3.2020	25.3.2020	2020-02-04	NEGATIF				NEGATIF
hs1120	hs1120	45	25/6/1976	India	Female	Citizen	No 36 Jalan Cempaka 6, Taman Cempaka Serendah	3.37005	101.613		Selangor				NO		KELUARGA			DAERAH	28.4.2020	27.4.2020	29.4.2020	NEGATIF	1.5.2020	1.5.2020	NEGATIF	NEGATIF
hs1121	hs1121	50	13/12/1970	India	Male	Citizen	No 36 Jalan Cempaka 6, Taman Cempaka Serendah	3.37005	101.613		Selangor				NO		KELUARGA			DAERAH	28.4.2020	27.4.2020	29.4.2020	NEGATIF	1.5.2020	1.5.2020	NEGATIF	NEGATIF
hs1122	hs1122	55	22/12/1965	India	Female	Citizen	No 36 Jalan Cempaka 6, Taman Cempaka Serendah	3.37005	101.613		Selangor				NO		SAUDARA			DAERAH	28.4.2020	27.4.2020	29.4.2020	NEGATIF				NEGATIF
hs1123	hs1123	24	1997-09-02	Melayu	Female	Citizen	No 3 Jalan Songket 2B, Taman Desa Bukit Bujang	3.53559	101.656		Selangor									TAHFIZ (KONTEK)	9.5.2020	8.5.2020	9.5.2020	NEGATIF				NEGATIF
hs1124	hs1124	50	16/12/1970	Melayu	Female	Citizen	No 3 Jalan Songket 2B, Taman Desa Bukit Bujang	3.53559	101.656		Selangor				NO		JIRAN			TAHFIZ (KONTEK)	9.5.2020	8.5.2020	11.5.2020	NEGATIF				NEGATIF
hs1125	hs1125	13	25/9/2008	Melayu	Female	Citizen	No 1 Jalang Songket 2B, Taman Desa Bukit Bujang	3.53559	101.656		Selangor				NO		JIRAN			TAHFIZ (KONTEK)	9.5.2020	8.5.2020	11.5.2020	NEGATIF				NEGATIF
hs1126	hs1126	21	19/2/2000	Melayu	Male	Citizen	No 3 Jalan Songket 2B, Taman Desa Bukit Bujang	3.53559	101.656		Selangor				NO		JIRAN			TAHFIZ (KONTEK)	9.5.2020	8.5.2020	11.5.2020	NEGATIF				NEGATIF
hs1127	hs1127	17	30/10/2004	Melayu	Female	Citizen	No 3 Jalan Songket 2B, Taman Desa Bukit Bujang	3.53559	101.656		Selangor				NO		JIRAN			TAHFIZ (KONTEK)	9.5.2020	8.5.2020	11.5.2020	NEGATIF				NEGATIF
hs1128	hs1128	15	29/12/2005	Melayu	Male	Citizen	No 1 Jalan Songket 2B, Taman Desa Bukit Bujang	3.53559	101.656		Selangor				NO		JIRAN			TAHFIZ (KONTEK)	9.5.2020	8.5.2020	11.5.2020	NEGATIF				NEGATIF
hs1129	hs1129	40	22/5/1981	Melayu	Female	Citizen	No 1 Jalang Songket 2B, Taman Desa Bukit Bujang	3.53559	101.656		Selangor				NO		KELUARGA			TAHFIZ (KONTEK)	9.5.2020	8.5.2020	11.5.2020	NEGATIF				NEGATIF
hs113	hs113	33	13/5/1988	India	Female	Citizen	SK Taman Bunga Raya 1	3.43862	101.551		Selangor									DAERAH	28.3.2020	25.3.2020	2020-02-04	NEGATIF				NEGATIF
hs1130	hs1130	11	14/8/2010	Melayu	Female	Citizen	No 3 Jalan Songket 2B, Taman Desa Bukit Bujang	3.53559	101.656		Selangor				NO		JIRAN			TAHFIZ (KONTEK)	9.5.2020	8.5.2020	11.5.2020	NEGATIF				NEGATIF
hs1131	hs1131	49	14/9/1972	Melayu	Female	Citizen	No 5 Jalan Songket 2B, Taman Desa Bukit Bujang	3.53559	101.656		Selangor		GURU	SK KKB2	NO		KELUARGA			TAHFIZ (KONTEK)	9.5.2020	8.5.2020	11.5.2020	NEGATIF				NEGATIF
hs1132	hs1132	24	17/9/1997	Melayu	Female	Citizen	No 5 Jalan Songket 2B, Taman Desa Bukit Bujang	3.53559	101.656		Selangor		PELAJAR	IKBN PERTAK	NO		KELUARGA			TAHFIZ (KONTEK)	9.5.2020	8.5.2020	11.5.2020	NEGATIF				NEGATIF
hs1133	hs1133	21	15/12/1999	Melayu	Male	Citizen	No 5 Jalan Songket 2B, Taman Desa Bukit Bujang	3.53559	101.656		Selangor		PELAJAR	IKBN IPOH	NO		KELUARGA			TAHFIZ (KONTEK)	9.5.2020	8.5.2020	11.5.2020	NEGATIF				NEGATIF
hs1134	hs1134	17	17/2/2004	Melayu	Male	Citizen	No 5 Jalan Songket 2B, Taman Desa Bukit Bujang	3.53559	101.656		Selangor		PELAJAR	SMK AMPANG PECAH	NO		KELUARGA			TAHFIZ (KONTEK)	9.5.2020	8.5.2020	11.5.2020	NEGATIF				NEGATIF
hs1135	hs1135	12	23/2/2009	Melayu	Male	Citizen	No 5 Jalan Songket 2B, Taman Desa Bukit Bujang	3.53559	101.656		Selangor		PELAJAR	SMK AMPANG PECAH	NO		KELUARGA			TAHFIZ (KONTEK)	9.5.2020	8.5.2020	11.5.2020	NEGATIF				NEGATIF
hs1136	hs1136	54	1967-10-06	Melayu	Male	Citizen	No 3 Jalan Songket 2B, Taman Desa Bukit Bujang	3.53559	101.656		Selangor			JKM SERENDAH	NO		JIRAN			TAHFIZ (KONTEK)	9.5.2020	8.5.2020	11.5.2020	NEGATIF				NEGATIF
hs1137	hs1137	42	1979-02-03	Melayu	Male	Citizen	No 1 Jalang Songket 2B, Taman Desa Bukit Bujang	3.53559	101.656		Selangor		PEGAWAI	KPDNKK	NO		JIRAN			TAHFIZ (KONTEK)	9.5.2020	8.5.2020	11.5.2020	NEGATIF				NEGATIF
hs1138	hs1138	49	17/10/1972	Melayu	Female	Citizen	No 3 Jalan Songket 2B, Taman Desa Bukit Bujang	3.53559	101.656		Selangor			HKKB	NO		JIRAN			TAHFIZ (KONTEK)	9.5.2020	8.5.2020	11.5.2020	NEGATIF				NEGATIF
hs1139	hs1139	50	20/5/1971	Melayu	Male	Citizen	No 5 Jalan Songket 2B, Taman Desa Bukit Bujang	3.53559	101.656		Selangor		PENGAJAR	IKBN PERTAK	NO		KELUARGA			TAHFIZ (KONTEK)	9.5.2020	8.5.2020	11.5.2020	NEGATIF	8.5.2020	10.5.2020	NEGATIF	NEGATIF
hs114	hs114	45	29/2/1976	Melayu	Female	Citizen	SK Taman Bunga Raya 1	3.43862	101.551		Selangor									DAERAH	28.3.2020	25.3.2020	2020-02-04	NEGATIF				NEGATIF
hs1140	hs1140	21	23/1/2000	Melayu	Female	Citizen	Lot 1175, Kg Ulu Kalong, Ulu Yam, 44300 Hulu Selangor	3.42987	101.669		Selangor				NO		KELUARGA			TAHFIZ (KONTEK)	9.5.2020	8.5.2020	9.5.2020	NEGATIF				NEGATIF
hs1141	hs1141	51	1970-06-10	Melayu	Female	Citizen	Lot 1175, Kg Ulu Kalong, Ulu Yam, 44300 Hulu Selangor	3.42987	101.669		Selangor				NO		KELUARGA			TAHFIZ (KONTEK)	9.5.2020	8.5.2020	9.5.2020	NEGATIF				NEGATIF
hs1142	hs1142	4	2017-12-04	Melayu	Male	Citizen	Lot 1175, Kg Ulu Kalong, Ulu Yam, 44300 Hulu Selangor	3.42987	101.669		Selangor				NO		SAUDARA			TAHFIZ (KONTEK)	9.5.2020	8.5.2020	9.5.2020	NEGATIF				NEGATIF
hs1143	hs1143	52	24/3/1969	Melayu	Male	Citizen	Lot 1175 Kampung Ulu Kalong 44300 Ulu Yam Bharu Selangor	3.42987	101.669		Selangor				NO		JIRAN			TAHFIZ (KONTEK)	9.5.2020	8.5.2020	9.5.2020	NEGATIF	28.5.2020	29.5.2020	NEGATIF	NEGATIF
hs1144	hs1144	4	2017-07-02	Melayu	Female	Citizen	No18, Jln Bunga Kertas 3c, Bukit Sentosa, Hulu Selangor Selangor, Malaysia	3.39719	101.558		Selangor				NO		KELUARGA			TAHFIZ (KONTEK)	15.5.2020	14.5.2020	16.5.2020	NEGATIF				NEGATIF
hs1145	hs1145	2	2019-01-04	Melayu	Female	Citizen	No18, Jln Bunga Kertas 3c, Bukit Sentosa, Hulu Selangor Selangor, Malaysia	3.39719	101.558		Selangor				NO		KELUARGA			TAHFIZ (KONTEK)	15.5.2020	14.5.2020	16.5.2020	NEGATIF				NEGATIF
hs1146	hs1146	7	13/7/2014	Melayu	Female	Citizen	No18, Jln Bunga Kertas 3c, Bukit Sentosa, Hulu Selangor Selangor, Malaysia	3.39719	101.558		Selangor				NO		KELUARGA			TAHFIZ (KONTEK)	15.5.2020	14.5.2020	16.5.2020	NEGATIF				NEGATIF
hs1147	hs1147	12	2009-03-07	Melayu	Female	Citizen	No18, Jln Bunga Kertas 3c, Bukit Sentosa, Hulu Selangor Selangor, Malaysia	3.39719	101.558		Selangor				NO		KELUARGA			TAHFIZ (KONTEK)	15.5.2020	14.5.2020	16.5.2020	NEGATIF				NEGATIF
hs1148	hs1148	9	2012-02-07	Melayu	Male	Citizen	No18, Jalan Bunga Kertas 3c, Bukit Sentosa, Hulu Selangor Selangor, Malaysia	3.39719	101.558		Selangor				NO		KELUARGA			TAHFIZ (KONTEK)	15.5.2020	14.5.2020	16.5.2020	NEGATIF				NEGATIF
hs1149	hs1149	39	30/10/1982	Melayu	Female	Citizen	No18, Jln Bunga Kertas 3c, Bukit Sentosa, Hulu Selangor Selangor, Malaysia	3.39719	101.558		Selangor				NO		KELUARGA			TAHFIZ (KONTEK)	15.5.2020	14.5.2020	16.5.2020	NEGATIF				NEGATIF
hs115	hs115	28	1993-09-01	Melayu	Female	Citizen	SK Taman Bunga Raya 1	3.43862	101.551		Selangor									DAERAH	28.3.2020	25.3.2020	2020-02-04	NEGATIF				NEGATIF
hs1150	hs1150	41	16/3/1980	Melayu	Male	Citizen	No18, Jln Bunga Kertas 3c, Bukit Sentosa, Hulu Selangor Selangor, Malaysia	3.39719	101.558		Selangor				NO		KELUARGA			TAHFIZ (KONTEK)	15.5.2020	14.5.2020	16.5.2020	NEGATIF				NEGATIF
hs1151	hs1151	45	1976-01-12	Melayu	Male	Citizen	No181, Kampung Sungai Buaya, Hulu Selangor Selangor, Malaysia	3.3921	101.527		Selangor									DAERAH	15.5.2020	14.5.2020	16.5.2020	NEGATIF				NEGATIF
hs1152	hs1152	10	24/1/2011	Melayu	Female	Citizen	No 7 Jalan Kembojasari 10, Bandar Baru Sungai Buaya, - Hulu Selangor Selangor, Malaysia	3.3827	101.536		Selangor									TAHFIZ (KONTEK)	14.5.2020	13.5.2020	15.5.2020	NEGATIF				NEGATIF
hs1153	hs1153	44	1977-09-06	Melayu	Female	Citizen	No 7 Jalan Kembojasari 10, Bandar Baru Sungai Buaya, Hulu Selangor Selangor, Malaysia	3.3827	101.536		Selangor									TAHFIZ (KONTEK)	14.5.2020	13.5.2020	15.5.2020	NEGATIF	27.5.2020	27.5.2020	NEGATIF	NEGATIF
hs1154	hs1154	47	1974-04-09	Melayu	Male	Citizen	No7, Jln Kemboja Sari 10, Bandar Sg Buaya,	3.38073	101.535		Selangor									TAHFIZ (KONTEK)	20.5.2020	19.5.2020	20.5.2020	NEGATIF				NEGATIF
hs1155	hs1155	29	1992-12-10	Melayu	Male	Citizen	No11, Jalan Ju 6, Taman Jasa Utama, Batu Cave, Hulu Selangor Selangor, Malaysia	3.26915	101.681		Selangor									DAERAH	15.5.2020	14.5.2020	16.5.2020	NEGATIF				NEGATIF
hs1156	hs1156	46	39/07/75	India	Male	Citizen	No7, Jalan Teratai 12 Bb, Hulu Selangor Selangor, Malaysia	3.40246	101.556		Selangor									DAERAH	15.5.2020	14.5.2020	16.5.2020	NEGATIF	21.5.2020	23.5.2020	NEGATIF	NEGATIF
hs1157	hs1157	36	27/4/1985	Melayu	Female	Citizen	Blok C, Tingkat 3-03, Kuarters Rumah Ehsan, 44000 Kuala Kubu Bharu , Sel	3.57003	101.644		Selangor									PUSAT JAGAAN (PEKERJA)	18.5.2020	18.5.2020	19.5.2020	NEGATIF	21.5.2020	23.5.2020	NEGATIF	NEGATIF
hs1158	hs1158	30	23/8/1991	Melayu	Female	Citizen	G-2-02 Blok G Kuarters Hospital Kuala Kubu Bharu, 44000 Sel	3.56423	101.653		Selangor									PUSAT JAGAAN (PEKERJA)	18.5.2020	18.5.2020	19.5.2020	NEGATIF	21.5.2020	23.5.2020	NEGATIF	NEGATIF
hs1159	hs1159	29	29/2/1992	Orang Asli	Female	Citizen	Kuarters Rumah Ehsan Blok C Tingkat 2-01	3.57032	101.644		Selangor									PUSAT JAGAAN (PEKERJA)	18.5.2020	18.5.2020	19.5.2020	NEGATIF	21.5.2020	22.5.2020	NEGATIF	NEGATIF
hs116	hs116	36	1985-09-01	Melayu	Female	Citizen	SK Taman Bunga Raya 1	3.43862	101.551		Selangor									DAERAH	28.3.2020	25.3.2020	2020-02-04	NEGATIF				NEGATIF
hs1161	hs1161	33	1988-08-10	Melayu	Female	Citizen	B7-01, Blok Mawar, Maktab Pdrm Kuala Kubu Bharu, 44000 Kuala Kubu Bharu, Sel	3.56322	101.65		Selangor									PUSAT JAGAAN (PEKERJA)	18.5.2020	18.5.2020	19.5.2020	NEGATIF	21.5.2020	23.5.2020	NEGATIF	NEGATIF
hs1162	hs1162	58	18/12/1962	India	Female	Citizen	27 Jalan Hang Lekiu, Jalan Padang Golf, 44000 Kuala Kubu Bharu, Sel	3.57119	101.65		Selangor									PUSAT JAGAAN (PEKERJA)	18.5.2020	18.5.2020	19.5.2020	NEGATIF	21.5.2020	23.5.2020	NEGATIF	NEGATIF
hs1163	hs1163	57	1963-12-12	Melayu	Female	Citizen	No 156, Jalan Arif 8, Taman Arif Utama, 44000 Kuala Kubu Bhyaru	3.56168	101.646		Selangor									PUSAT JAGAAN (PEKERJA)	18.5.2020	18.5.2020	19.5.2020	NEGATIF	21.5.2020	23.5.2020	NEGATIF	NEGATIF
hs1164	hs1164	58	25/8/1963	Melayu	Female	Citizen	01-02 Blok A Kuarters Kakitangam Rumah Ehsan, 44000 Kuala Kubu Bharu , Sel	3.57003	101.644		Selangor									PUSAT JAGAAN (PEKERJA)	18.5.2020	18.5.2020	19.5.2020	NEGATIF	21.5.2020	23.5.2020	NEGATIF	NEGATIF
hs1165	hs1165	32	1989-11-05	Melayu	Female	Citizen	No 222 Jalan Bangau, Rumah Murah Padang Tembak , 44000 Kuala Kubu Bhari Sel	3.57059	101.664		Selangor									PUSAT JAGAAN (PEKERJA)	18.5.2020	18.5.2020	19.5.2020	NEGATIF	21.5.2020	23.5.2020	NEGATIF	NEGATIF
hs1166	hs1166	30	13/5/1991	Melayu	Female	Citizen	4-02 Blok B Kuarters Kakitangan Rumah Ehsan , 44000 Kuala Kubu Bharu, Sel	3.57003	101.644		Selangor									PUSAT JAGAAN (PEKERJA)	18.5.2020	18.5.2020	19.5.2020	NEGATIF	21.5.2020	23.5.2020	NEGATIF	NEGATIF
hs1167	hs1167	33	22/3/1988	Melayu	Female	Citizen	No 53 Jalan Gapi Seksyen 5, Antara Gapi, 48200 Serendah , Sel	3.42314	101.644		Selangor									PUSAT JAGAAN (PEKERJA)	18.5.2020	18.5.2020	19.5.2020	NEGATIF	21.5.2020	23.5.2020	NEGATIF	NEGATIF
hs1168	hs1168	29	1992-02-01	Orang Asli	Female	Citizen	Blok C, 04-04, Kuarters Kakitangan Rumah Ehsan , 44000 Kuala Kubu Bharu, Sel	3.57003	101.644		Selangor									PUSAT JAGAAN (PEKERJA)	18.5.2020	18.5.2020	19.5.2020	NEGATIF	21.5.2020	23.5.2020	NEGATIF	NEGATIF
hs1169	hs1169	21	25/3/2000	Cina	Female	Citizen	Blok C, 04-04, Kuarters Kakitangan Rumah Ehsan Kuala Kubu Bharu, 44000 Sel	3.57003	101.644		Selangor									PUSAT JAGAAN (PEKERJA)	18.5.2020	18.5.2020	19.5.2020	NEGATIF				NEGATIF
hs117	hs117	50	1971-12-07	Melayu	Female	Citizen	SK Taman Bunga Raya 1	3.43862	101.551		Selangor									DAERAH	28.3.2020	25.3.2020	2020-02-04	NEGATIF				NEGATIF
hs1170	hs1170	69	27/1/1952	Melayu	Female	Citizen	No 10, Jln Damai 3, Tmn Desa Damai,	3.09737	101.682		Selangor									PUSAT JAGAAN (KONTEK)	22.5.2020	21.5.2020	23.5.2020	NEGATIF				NEGATIF
hs1171	hs1171	52	25/5/1969	Melayu	Male	Citizen	PT 152 Jalan 5 Taman Ampang Indah	3.14917	101.776		Selangor									PUSAT JAGAAN (KONTEK)	22.5.2020	21.5.2020	23.5.2020	NEGATIF				NEGATIF
hs1172	hs1172	51	24/10/1970	Melayu	Female	Citizen	No 13 Jalan 24, Taman Ampang Pecah, Kuala Kubu Bharu,	3.5452	101.659		Selangor									PUSAT JAGAAN (KONTEK)	22.5.2020	21.5.2020	23.5.2020	NEGATIF				NEGATIF
hs1173	hs1173	63	1958-05-11	Melayu	Male	Citizen	No 5 Jalan Damai 2, Taman Damai Utama, Kuala Kubu Bharu,	3.53756	101.656		Selangor									PUSAT JAGAAN (KONTEK)	22.5.2020	21.5.2020	23.5.2020	NEGATIF				NEGATIF
hs1174	hs1174	58	29/3/1963	Melayu	Male	Citizen	No 26 Kg Kuala Kubu Road, Kuala Kubu Bharu,	3.56163	101.631		Selangor									PUSAT JAGAAN (KONTEK)	22.5.2020	21.5.2020	23.5.2020	NEGATIF				NEGATIF
hs1175	hs1175	26	1995-11-02	Melayu	Male	Citizen	A239 Jalan Lama Tebuk Marso Sungai Haji Dorani 45300 Sg Besar	3.64933	101.018		Selangor									PUSAT JAGAAN (PEKERJA)	22.5.2020	21.5.2020	23.5.2020	NEGATIF				NEGATIF
hs1176	hs1176	39	16/7/1982	Melayu	Male	Citizen	No 19 Jalan Salat 24/32 Seksyen 24, Shah ALAM	3.03865	101.518		Selangor									PUSAT JAGAAN (KONTEK)	22.5.2020	21.5.2020	23.5.2020	NEGATIF				NEGATIF
hs1177	hs1177	29	15/7/1992	Melayu	Male	Citizen	04-01 Blok A Kuarters Kakitangan Rumah Ehsan KKb	3.57003	101.644		Selangor									PUSAT JAGAAN (KONTEK)	22.5.2020	21.5.2020	23.5.2020	NEGATIF				NEGATIF
hs1178	hs1178	27	24/6/1994	Melayu	Female	Citizen	No 13 Jln 24, Tmn Ampang Pecah,	3.54663	101.659		Selangor									PUSAT JAGAAN (KONTEK)	22.5.2020	21.5.2020	23.5.2020	NEGATIF				NEGATIF
hs1179	hs1179	12	23/3/2009	Melayu	Female	Citizen	No 13 Jalan 24, Taman Ampang Pecah, Kuala Kubu Bharu,	3.5452	101.659		Selangor									PUSAT JAGAAN (KONTEK)	22.5.2020	21.5.2020	23.5.2020	NEGATIF	21.5.2020	23.5.2020	NEGATIF	NEGATIF
hs118	hs118	34	26/5/1987	Melayu	Female	Citizen	SK Taman Bunga Raya 1	3.43862	101.551		Selangor									DAERAH	28.3.2020	25.3.2020	2020-02-04	NEGATIF				NEGATIF
hs1180	hs1180	53	16/3/1968	Melayu	Female	Citizen	Lot 786 C, Jalan Sungai Buaya,Sungai Choh,48000 Rawang Sel	3.34674	101.582		Selangor									PUSAT JAGAAN (PEKERJA)	19.5.2020	18.5.2020	19.5.2020	NEGATIF	21.5.2020	23.5.2020	NEGATIF	NEGATIF
hs1181	hs1181	34	16/6/1987	Melayu	Female	Citizen	Blok C -203 Kuarters Kakitangan Rumah Ehsan Kuala Kubu Bharu Sel	3.57003	101.644		Selangor									PUSAT JAGAAN (PEKERJA)	19.5.2020	18.5.2020	19.5.2020	NEGATIF	21.5.2020	23.5.2020	NEGATIF	NEGATIF
hs1182	hs1182	33	21/9/1988	Melayu	Female	Citizen	Blok C 2-04, Kuarters Rumah Ehsan Kuala Kubu Bharu, 44000 Kuala Kubu Bharu, Sel	3.57003	101.644		Selangor									PUSAT JAGAAN (PEKERJA)	19.5.2020	18.5.2020	19.5.2020	NEGATIF	18.5.2020	19.5.2020	NEGATIF	NEGATIF
hs1183	hs1183	28	13/8/1993	Melayu	Female	Citizen	No 19 F Kuarters Akademi & Penyelamat Malaysia,				Selangor									PUSAT JAGAAN (KONTEK)	22.5.2020	21.5.2020	23.5.2020	NEGATIF				NEGATIF
hs1184	hs1184	9	30/5/2012	India	Male	Citizen	No 5, Jln Damai 3, Tmn Damai Utama,	3.53824	101.656		Selangor		STUDENT	SJKT KKB	NO		KELUARGA			PUSAT JAGAAN (KONTEK)	22.5.2020	21.5.2020	23.5.2020	NEGATIF				NEGATIF
hs1185	hs1185	60	1961-03-07	India	Male	Citizen	No 5, Jln Damai 3, Tmn Damai Utama,	3.53824	101.656		Selangor				NO		KELUARGA			PUSAT JAGAAN (KONTEK)	22.5.2020	21.5.2020	23.5.2020	NEGATIF				NEGATIF
hs1186	hs1186	13	16/12/2007	India	Male	Citizen	No 5, Jln Damai 3, Tmn Damai Utama,	3.53824	101.656		Selangor		MYSKIL	KK KALUMPANG	NO		KELUARGA			PUSAT JAGAAN (KONTEK)	22.5.2020	21.5.2020	23.5.2020	NEGATIF				NEGATIF
hs1187	hs1187	32	1989-01-04	India	Male	Citizen	No 5, Jln Damai 3, Tmn Damai Utama,	3.53824	101.656		Selangor				N0		KELUARGA			PUSAT JAGAAN (KONTEK)	22.5.2020	21.5.2020	23.5.2020	NEGATIF				NEGATIF
hs1188	hs1188	14	19/4/2007	India	Male	Citizen	No 5 Jalan Damai 3, Taman Damai Utama, Kuala Kubu Bharu,	3.53824	101.656		Selangor		MYSKIL	KK KALUMPANG	NO		KELUARGA			PUSAT JAGAAN (KONTEK)	22.5.2020	21.5.2020	23.5.2020	NEGATIF				NEGATIF
hs1189	hs1189	21	2000-01-09	India	Female	Citizen	No 5 Jalan 3 Taman Damai Utama, Kuala Kubu Bharu,	3.53824	101.656		Selangor				NO		KELUARGA			PUSAT JAGAAN (KONTEK)	22.5.2020	21.5.2020	23.5.2020	NEGATIF				NEGATIF
hs119	hs119	50	28/5/1971	Melayu	Female	Citizen	SK Taman Bunga Raya 1	3.43862	101.551		Selangor									DAERAH	28.3.2020	25.3.2020	2020-02-04	NEGATIF				NEGATIF
hs1190	hs1190	24	1997-04-06	Melayu	Male	Citizen	No 13 Jln 24, Tmn Ampang Pecah,	3.54663	101.659		Selangor									PUSAT JAGAAN (KONTEK)	22.5.2020	21.5.2020	23.5.2020	NEGATIF				NEGATIF
hs1191	hs1191	53	15/7/1968	Melayu	Male	Citizen	7-1-3 Flat Taman Wilayah Selayang	3.23759	101.661		Selangor									PUSAT JAGAAN (KONTEK)	23.5.2020	22.5.2020	24.5.2020	NEGATIF				NEGATIF
hs1192	hs1192	20	2001-04-09	Orang Asli	Male	Citizen	No 30 Kg Pertak KKB	3.58072	101.732		Selangor									PUSAT JAGAAN (KONTEK)	23.5.2020	22.5.2020	24.5.2020	NEGATIF				NEGATIF
hs1193	hs1193	33	23/5/1988	Orang Asli	Male	Citizen	No 32 Kg Orang Asli Tun Abdul Razak, Kuala Kubu Bharu,	3.57084	101.657		Selangor									PUSAT JAGAAN (KONTEK)	22.5.2020	21.5.2020	23.5.2020	NEGATIF				NEGATIF
hs1194	hs1194	19	2002-08-09	Orang Asli	Male	Citizen	Kg Orang Asli Pertak,	3.57482	101.737		Selangor									PUSAT JAGAAN (KONTEK)	23.5.2020	22.5.2020	24.5.2020	NEGATIF				NEGATIF
hs1195	hs1195	20	25/1/2001	Orang Asli	Female	Citizen	Kampung Orang Asli Pertak,	3.57482	101.737		Selangor									PUSAT JAGAAN (KONTEK)	23.5.2020	22.5.2020	24.5.2020	NEGATIF				NEGATIF
hs1196	hs1196	35	30/12/1985	Orang Asli	Female	Citizen	Kg Orang Asli Pertak,	3.57482	101.737		Selangor									PUSAT JAGAAN (KONTEK)	23.5.2020	22.5.2020	24.5.2020	NEGATIF				NEGATIF
hs1197	hs1197	29	14/7/1992	Orang Asli	Female	Citizen	Kg Orang Asli Pertak,	3.57482	101.737		Selangor									PUSAT JAGAAN (KONTEK)	23.5.2020	22.5.2020	24.5.2020	NEGATIF				NEGATIF
hs1198	hs1198	27	26/1/1994	Orang Asli	Female	Citizen	No 30 Kg Orang Asli Pertak,	3.60591	101.73		Selangor									PUSAT JAGAAN (KONTEK)	23.5.2020	22.5.2020	24.5.2020	NEGATIF				NEGATIF
hs1199	hs1199	22	24/3/1999	Orang Asli	Male	Citizen	Kg Orang Asli Pertak,	3.57482	101.737		Selangor									PUSAT JAGAAN (KONTEK)	23.5.2020	22.5.2020	24.5.2020	NEGATIF				NEGATIF
hs12	hs12	30	20/3/1991	Melayu	Female	Citizen	BLOK 30-00-02, PANGSAPURI DBKL FASA2, JALAN MADRASAH, GOMBAK SETIA, KUALA LUMPUR	3.22178	101.72		Selangor			STAFF UDA HOLDING (OFFICEMATE)	NO		SEKERJA					2020-04-03	2020-06-03	NEGATIF				NEGATIF
hs120	hs120	51	18/5/1970	India	Female	Citizen					Selangor									DAERAH	28.3.2020	25.3.2020	2020-02-04	NEGATIF				NEGATIF
hs1200	hs1200	21	2000-08-11	Orang Asli	Male	Citizen	Kg Org Asli Pertak,	3.57482	101.737		Selangor									PUSAT JAGAAN (KONTEK)	23.5.2020	22.5.2020	24.5.2020	NEGATIF				NEGATIF
hs1201	hs1201	33	1988-07-03	Orang Asli	Male	Citizen	Kg Orang Asli Pertak,	3.57482	101.737		Selangor									PUSAT JAGAAN (KONTEK)	23.5.2020	22.5.2020	24.5.2020	NEGATIF				NEGATIF
hs1202	hs1202	51	15/10/1970	Orang Asli	Female	Citizen	Kg Orang Asli Pertak	3.57482	101.737		Selangor									PUSAT JAGAAN (KONTEK)	25.5.202020	25.5.2020	26.5.2020	NEGATIF				NEGATIF
hs1203	hs1203	36	13/3/1985	Orang Asli	Male	Citizen	Kg Orang Asli Pertak	3.57482	101.737		Selangor									PUSAT JAGAAN (KONTEK)	25.5.202020	25.5.2020	26.5.2020	NEGATIF				NEGATIF
hs1204	hs1204			Foreigner	Female	Non-citizen	No 11, Jalan Kemboja 4A/9, Taman Kemboja, Bukit Sentosa, 48300 Rawang, Selangor	3.41707	101.594		Selangor		UNEMPLOYED		NO		KELUARGA			DAERAH	25.5.2020	25.5.2020	26.5.2020	NEGATIF				NEGATIF
hs1205	hs1205			Foreigner	Male	Non-citizen	No 11, Jalan Kemboja 4A/9, Taman Kemboja, Bukit Sentosa, 48300 Rawang, Selangor	3.41707	101.594		Selangor		UNEMPLOYED		NO		KELUARGA			DAERAH	25.5.2020	25.5.2020	26.5.2020	NEGATIF				NEGATIF
hs1206	hs1206	26	21/1/1995	Melayu	Male	Citizen	No 11, Jalan Kemboja 4A/9, Taman Kemboja, Bukit Sentosa, 48300 Rawang, Selangor	3.41707	101.594		Selangor				NO		KELUARGA			DAERAH	25.5.2020	25.5.2020	26.5.2020	NEGATIF				NEGATIF
hs1207	hs1207			Foreigner	Female	Non-citizen	No 11, Jalan Kemboja 4A/9, Taman Kemboja, Bukit Sentosa, 48300 Rawang, Selangor	3.41707	101.594		Selangor		UNEMPLOYED		NO		KELUARGA			DAERAH	25.5.2020	25.5.2020	26.5.2020	NEGATIF				NEGATIF
hs1208	hs1208	16	2005-08-06	Melayu	Female	Citizen	No 11, Jalan Kemboja 4A/9, Taman Kemboja, Bukit Sentosa, 48300 Rawang, Selangor	3.41707	101.594		Selangor		UNEMPLOYED		NO		KELUARGA			DAERAH	25.5.2020	25.5.2020	26.5.2020	NEGATIF				NEGATIF
hs1209	hs1209			Foreigner	Male	Non-citizen	No 11, Jalan Kemboja 4A/9, Taman Kemboja, Bukit Sentosa, 48300 Rawang, Selangor	3.41707	101.594		Selangor		STUDENT	TAHFIZ INTEGRASI SARAN, JALAN SEROJA	NO		KELUARGA			DAERAH	25.5.2020	25.5.2020	26.5.2020	NEGATIF				NEGATIF
hs121	hs121	8	20/9/2013	Melayu	Male	Citizen					Selangor									DAERAH	28.3.2020	25.3.2020	2020-02-04	NEGATIF				NEGATIF
hs1210	hs1210			Foreigner	Female	Non-citizen	No 11, Jalan Kemboja 4A/9, Taman Kemboja, Bukit Sentosa, 48300 Rawang, Selangor	3.41707	101.594		Selangor				NO		KELUARGA			DAERAH	25.5.2020	25.5.2020	26.5.2020	NEGATIF				NEGATIF
hs1211	hs1211	42	1979-06-10	India	Female	Citizen	Persatuan Bantuan Keluarga Negeri Selangor, Ulu Yam,	3.42496	101.66		Selangor		setiausaha persatuan							PUSAT JAGAAN (KONTEK)	23.5.2020	22.5.2020	24.5.2020	NEGATIF				NEGATIF
hs1212	hs1212	24	1997-06-03	India	Female	Citizen	Persatuan Bantuan Keluarga Negeri Selangor, Ulu Yam,	3.42496	101.66		Selangor		kerani							PUSAT JAGAAN (KONTEK)	23.5.2020	22.5.2020	24.5.2020	NEGATIF				NEGATIF
hs1213	hs1213	55	1966-10-09	Cina	Male	Citizen	Persatuan Bantuan Keluarga Negeri Selangor, Ulu Yam,	3.42496	101.66		Selangor		pemandu							PUSAT JAGAAN (KONTEK)	23.5.2020	22.5.2020	24.5.2020	NEGATIF				NEGATIF
hs1214	hs1214	36	30/4/1985	Melayu	Male	Citizen	A6-07 Blok Melor, Maktab Pdrm 44000 Kuala Kubu Bharu Selangor	3.56322	101.65		Selangor				NO		KELUARGA			PUSAT JAGAAN (KONTEK)	25.5.2020	25.5.2020	26.5.2020	NEGATIF				NEGATIF
hs1215	hs1215	10	22/2/2011	Melayu	Female	Citizen	A6-07 Blok Melor, Maktab Pdrm 44000 Kuala Kubu Bharu Selangor	3.56322	101.65		Selangor				NO		KELUARGA			PUSAT JAGAAN (KONTEK)	25.5.2020	25.5.2020	26.5.2020	NEGATIF				NEGATIF
hs1216	hs1216	6	2015-03-12	Melayu	Male	Citizen	A6-07 Blok Melor, Maktab Pdrm 44000 Kuala Kubu Bharu Selangor	3.56322	101.65		Selangor				YES		KELUARGA			PUSAT JAGAAN (KONTEK)	25.5.2020	25.5.2020	26.5.2020	NEGATIF				NEGATIF
hs1217	hs1217	40	23/3/1981	Melayu	Female	Citizen	Maktab PDRM 44000 Kuala Kubu Bharu	3.56322	101.65		Selangor		PENGASUH		NO		PENGASUH			PUSAT JAGAAN (KONTEK)	25.5.2020	25.5.2020	26.5.2020	NEGATIF				NEGATIF
hs1218	hs1218	57	1964-07-12	India	Female	Citizen	No 3 Jalan Melor 10F, Desa Melor , 48200 Serendah	3.35342	101.633		Selangor									PUSAT JAGAAN (KONTEK)	26.5.2020	26.5.2020	26.5.2020	NEGATIF				NEGATIF
hs1219	hs1219	43	30/3/1978	Melayu	Female	Citizen	169, Taman Juta , 44000 Kuala Kubu Bharu	3.57361	101.654		Selangor									PUSAT JAGAAN (KONTEK)	26.5.2020	26.5.2020	26.5.2020	NEGATIF				NEGATIF
hs122	hs122	8	2013-02-07	Melayu	Female	Citizen	F-LG-01 Apt Dahlia, Tmn Bunga Raya, Bukit Beruntung	3.43757	101.548		Selangor									DAERAH	28.3.2020	25.3.2020	2020-02-04	NEGATIF				NEGATIF
hs1220	hs1220	49	1972-03-12	Cina	Male	Citizen	11 Jalan 4, Padang Golf , 44000 Kuala Kubu Bharu	3.57214	101.65		Selangor									PUSAT JAGAAN (KONTEK)	26.5.2020	26.5.2020	26.5.2020	NEGATIF				NEGATIF
hs1221	hs1221	41	30/8/1980	Melayu	Male	Citizen	Rumah Pekerja Kelab Golf Dan Country Kuala Kubu Bharu , Jalan Padang Golf	3.57214	101.65		Selangor									PUSAT JAGAAN (KONTEK)	26.5.2020	26.5.2020	26.5.2020	NEGATIF				NEGATIF
hs1222	hs1222	39	30/8/1982	Foreigner	Female	Non-citizen	Kelab Golf Dan Country Kuala Kubu Bharu , 44000 Kuala Kubu Bharu	3.57214	101.65		Selangor									PUSAT JAGAAN (KONTEK)	26.5.2020	26.5.2020	26.5.2020	NEGATIF				NEGATIF
hs1223	hs1223	60	13/5/1961	Melayu	Male	Citizen	No3, Kuaters Pdg Golf,	5.29685	100.528		Selangor									PUSAT JAGAAN (KONTEK)	29.5.2020	28.5.2020	29.5.2020	NEGATIF				NEGATIF
hs1224	hs1224	34	20/4/1987	Melayu	Female	Citizen	No 5 Jalan Mahagoni 5C/3, Batang Kali	3.46318	101.659		Selangor									DAERAH	25.5.2020	25.5.2020	26.5.2020	NEGATIF				NEGATIF
hs1225	hs1225	43	14/8/1978	Melayu	Female	Citizen	No 4 Jalan Anggerik 1A/7 BS 7 Bukit Sentosa 7	3.43267	101.571		Selangor									DAERAH	25.5.2020	25.5.2020	26.5.2020	NEGATIF				NEGATIF
hs1226	hs1226	53	27/11/1968	Melayu	Male	Citizen	B-1-3, Apartment Seri Kembangan, Bukit Beruntung, Selangor	3.42258	101.568		Selangor									PUSAT JAGAAN (KONTEK)	26.5.2020	26.5.2020	26.5.2020	NEGATIF				NEGATIF
hs1227	hs1227	52	15/6/1969	Melayu	Female	Citizen	B-1-3, Apartment Seri Kembangan, Bukit Beruntung, Selangor	3.42258	101.568		Selangor									TAHFIZ (KONTEK)	26.5.2020	26.5.2020	26.5.2020	NEGATIF				NEGATIF
hs1228	hs1228	25	1996-01-03	Melayu	Female	Citizen	B-1-3, Apartment Seri Kembangan, Bukit Beruntung, Selangor	3.42258	101.568		Selangor									TAHFIZ (KONTEK)	26.5.2020	26.5.2020	26.5.2020	NEGATIF				NEGATIF
hs1229	hs1229	24	1997-06-12	Melayu	Male	Citizen	B-1-3, Apartment Seri Kembangan, Bukit Beruntung, Selangor	3.42258	101.568		Selangor									TAHFIZ (KONTEK)	26.5.2020	26.5.2020	26.5.2020	NEGATIF				NEGATIF
hs123	hs123	28	30/5/1993	India	Male	Citizen					Selangor									DAERAH	28.3.2020	25.3.2020	2020-02-04	NEGATIF				NEGATIF
hs1230	hs1230	22	1999-02-05	Melayu	Male	Citizen	B-1-3, Apartment Seri Kembangan, Bukit Beruntung, Selangor	3.42258	101.568		Selangor									TAHFIZ (KONTEK)	26.5.2020	26.5.2020	26.5.2020	NEGATIF				NEGATIF
hs1231	hs1231	12	2009-12-06	Melayu	Female	Citizen	B-1-3, Apartment Seri Kembangan, Bukit Beruntung, Selangor	3.42258	101.568		Selangor									TAHFIZ (KONTEK)	26.5.2020	26.5.2020	26.5.2020	NEGATIF	22.6.2020	23.6.2020	NEGATIF	NEGATIF
hs1232	hs1232	28	1993-08-02	Melayu	Female	Citizen	No 9 Jalan Tempua 1b Taman Tempua Bestari Kalumpang	3.62543	101.574		Selangor									TAHFIZ LUAR (KONTAK)	4.4.2020	2020-01-04	6.4.2020	NEGATIF				NEGATIF
hs1233	hs1233	23	22/5/1998	Melayu	Male	Citizen	No 9 Jln Tempua,1b Taman Tempua Bestari Kalumpang,	3.62543	101.574		Selangor									TAHFIZ LUAR (KONTAK)	23.6.2020	22.6.2020	23.6.2020	NEGATIF				NEGATIF
hs1234	hs1234	25	1996-01-07	Melayu	Male	Citizen	No. 9, Jln Tempua 1b, Taman Tempua Bestari 44100 Kalumpang.,	3.62543	101.574		Selangor									TAHFIZ LUAR (KONTAK)	23.6.2020	22.6.2020	23.6.2020	NEGATIF				NEGATIF
hs1235	hs1235	58	26/10/1963	Melayu	Female	Citizen	No. 9, Jln Tempua 1b, Taman Tempua Bestari 44100 Kalumpang.,	3.62543	101.574		Selangor									TAHFIZ LUAR (KONTAK)	23.6.2020	22.6.2020	23.6.2020	NEGATIF				NEGATIF
hs1236	hs1236	62	24/2/1959	Melayu	Male	Citizen	No. 9, Jln Tempua 1b, Taman Tempua Bestari 44100 Kalumpang,	3.62543	101.574		Selangor									TAHFIZ LUAR (KONTAK)	23.6.2020	22.6.2020	23.6.2020	NEGATIF				NEGATIF
hs1237	hs1237	41	1980-08-05	India	Female	Citizen	02-05 BLK B JALAN PJU 10/3C DAMANSARA DAMAI 47830 PETALING JAYA	3.19497	101.592		Selangor				NO		KELUARGA					27/4/2020		NEGATIF				NEGATIF
hs1238	hs1238	58	27/10/1963	India	Female	Citizen	NO A26 JALAN CEMPAKA 6 TAMAN CEMPAKA SERENDAH	3.37026	101.613		Selangor				NO		SAUDARA					27/4/2020		NEGATIF				NEGATIF
hs1239	hs1239	12	2009-07-08	India	Male	Citizen	02-05 BLK B JALAN PJU 10/3C DAMANSARA DAMAI 47830 PETALING JAYA	3.19497	101.592		Selangor				NO		SAUDARA					27/4/2020		NEGATIF				NEGATIF
hs124	hs124	8	2013-02-07	Melayu	Female	Citizen	P-2-19 Apt Dahlia, Taman Bunga Raya, Bukit Beruntung	3.43071	101.562		Selangor									DAERAH	28.3.2020	25.3.2020	2020-02-04	NEGATIF				NEGATIF
hs1240	hs1240	44	26/7/1977	India	Male	Citizen	02-05 BLK B JALAN PJU 10/3C DAMANSARA DAMAI 47830 PETALING JAYA	3.19497	101.592		Selangor				NO		KELUARGA					27/4/2020		NEGATIF				NEGATIF
hs1241	hs1241	28	16/6/1993	India	Female	Citizen	NO A26 JALAN CEMPAKA 6 TAMAN CEMPAKA SERENDAH	3.37026	101.613		Selangor				NO		SAUDARA					27/4/2020		NEGATIF				NEGATIF
hs1242	hs1242	42	1979-12-02	India	Male	Citizen	NO 1-36 JAALN DM3 TAMAN DESA MUTIARA BNADAR COUNTRY HOMES RAWANG	3.32738	101.522		Selangor				NO		KELUARGA					27/4/2020		NEGATIF				NEGATIF
hs1243	hs1243	40	1981-01-06	India	Female	Citizen	NO 1-36 JAALN DM3 TAMAN DESA MUTIARA BNADAR COUNTRY HOMES RAWANG	3.32738	101.522		Selangor				NO		KELUARGA					27/4/2020		NEGATIF				NEGATIF
hs1244	hs1244	63	1958-03-11	India	Male	Citizen	NO A26 JALAN CEMPAKA 6 TAMAN CEMPAKA SERENDAH	3.37026	101.613		Selangor				NO		SAUDARA					27/4/2020		NEGATIF				NEGATIF
hs1245	hs1245	25	1996-08-01	India	Male	Citizen	NO A26 JALAN CEMPAKA 6 TAMAN CEMPAKA SERENDAH	3.37026	101.613		Selangor				NO		SAUDARA					27/4/2020		NEGATIF				NEGATIF
hs1246	hs1246	60	1961-02-01	Melayu	Female	Citizen	A-23, FELDA BUKIT JALOR, 73200, GEMENCHEH, NEGERI SEMBILAN.	2.59464	102.413		Selangor				NO		SAUDARA							NEGATIF				NEGATIF
hs1247	hs1247	82	20/10/1939	Melayu	Male	Citizen	A-23, FELDA BUKIT JALOR, 73200, GEMENCHEH, NEGERI SEMBILAN.	2.59464	102.413		Selangor				NO		SAUDARA							NEGATIF				NEGATIF
hs1248	hs1248	30	1991-06-02	Melayu	Male	Citizen	Lot 1175 Kampung Ulu Kalong 44300 Ulu Yam Bharu Selangor	3.42987	101.669		Selangor				NO		KELUARGA					5.5.2020	7.5.2020	NEGATIF				NEGATIF
hs125	hs125	7	2014-01-01	Melayu	Male	Citizen	F-2-33A, Blok F, Apt Dahlia, Taman Bunga Raya	3.43757	101.548		Selangor									DAERAH	28.3.2020	25.3.2020	2020-02-04	NEGATIF				NEGATIF
hs1250	hs1250			Foreigner	Male	Non-citizen	Madrasah Quran Wa Sunnah Jalan Lama Genting	3.43466	101.695		Selangor						TAHFIZ					13.4.2020	15.4.2020	NEGATIF				NEGATIF
hs1251	hs1251	20	28/9/2001	Melayu	Male	Citizen	Madrasah Quran Wa Sunnah Jalan Lama Genting	3.43466	101.695		Selangor						TAHFIZ					24.3.2020	31.3.2020	NEGATIF	13.4.2020	15.4.2020	NEGATIF	NEGATIF
hs1252	hs1252	13	29/6/2008	Melayu	Male	Citizen	MADRASAH WASUNNAH, JALAN GENTING LAMA, BATANG KALI	3.44485	101.687		Selangor						TAHFIZ							NEGATIF				NEGATIF
hs1253	hs1253	14	17/1/2007	Melayu	Male	Citizen	Madrasah Quran Wa Sunnah Jalan Lama Genting	3.43466	101.695		Selangor						TAHFIZ					31.3.2020	4.4.2020	NEGATIF	13.4.2020	15.4.2020	NEGATIF	NEGATIF
hs1254	hs1254			Foreigner	Male	Non-citizen	Madrasah Quran Wa Sunnah Jalan Lama Genting	3.43466	101.695		Selangor						TAHFIZ					25.3.2020	31.3.2020	NEGATIF	13.4.2020	15.4.2020	NEGATIF	NEGATIF
hs1255	hs1255	29	1992-02-07	Melayu	Male	Citizen	Madrasah Quran Wa Sunnah Jalan Lama Genting	3.43466	101.695		Selangor						TAHFIZ					24.3.2020	31.3.2020	NEGATIF				NEGATIF
hs1256	hs1256	16	14/8/2005	Melayu	Male	Citizen	Madrasah Quran Wa Sunnah Jalan Lama Genting	3.43466	101.695		Selangor						TAHFIZ					31.3.2020	4.4.2020	NEGATIF	13.4.2020	15.4.2020	NEGATIF	NEGATIF
hs1257	hs1257			Foreigner	Male	Non-citizen	Madrasah Quran Wa Sunnah Jalan Lama Genting	3.43466	101.695		Selangor						TAHFIZ					13.4.2020	15.4.2020	NEGATIF				NEGATIF
hs1258	hs1258			Foreigner	Male	Non-citizen	Madrasah Quran Wa Sunnah Jalan Lama Genting	3.43466	101.695		Selangor						TAHFIZ					13.4.2020	15.4.2020	NEGATIF				NEGATIF
hs1259	hs1259			Foreigner	Male	Non-citizen	Madrasah Quran Wa Sunnah Jalan Lama Genting	3.43466	101.695		Selangor						TAHFIZ					13.4.2020	15.4.2020	NEGATIF				NEGATIF
hs126	hs126	8	16/8/2013	Melayu	Female	Citizen	J-3-43 Apt Cempaka, Taman Bunga Raya, Bukit Beruntung	3.43794	101.548		Selangor									DAERAH	28.3.2020	25.3.2020	2020-02-04	NEGATIF				NEGATIF
hs1260	hs1260	53	15/9/1968	Melayu	Male	Citizen	Maahad Tahfiz Al-Walid, No 105 Jln Ros Golf Club Bkt Beruntung	3.44971	101.561		Selangor						TAHFIZ							NEGATIF				NEGATIF
hs1261	hs1261			Foreigner	Male	Non-citizen	Maahad Tahfiz Al-Walid, No 105 Jln Ros Golf Club Bkt Beruntung	3.44971	101.561		Selangor						TAHFIZ							NEGATIF				NEGATIF
hs1262	hs1262	17	2004-05-03	Melayu	Male	Citizen	Maahad Tahfiz Al-Walid, No 105 Jln Ros Golf Club Bkt Beruntung	3.44971	101.561		Selangor						TAHFIZ							NEGATIF				NEGATIF
hs1263	hs1263	15	31/12/2005	Melayu	Male	Citizen	Maahad Tahfiz Al-Walid, No 105 Jln Ros Golf Club Bkt Beruntung	3.44971	101.561		Selangor						TAHFIZ							NEGATIF				NEGATIF
hs1264	hs1264	14	30/5/2007	Melayu	Male	Citizen	Maahad Tahfiz Al-Walid, No 105 Jln Ros Golf Club Bkt Beruntung	3.44971	101.561		Selangor						TAHFIZ							NEGATIF				NEGATIF
hs1265	hs1265	14	14/9/2007	Melayu	Male	Citizen	Maahad Tahfiz Al-Walid, No 105 Jln Ros Golf Club Bkt Beruntung	3.44971	101.561		Selangor						TAHFIZ							NEGATIF				NEGATIF
hs1266	hs1266	14	30/9/2007	Melayu	Male	Citizen	Maahad Tahfiz Al-Walid, No 105 Jln Ros Golf Club Bkt Beruntung	3.44971	101.561		Selangor						TAHFIZ							NEGATIF				NEGATIF
hs1267	hs1267	13	2008-09-06	Melayu	Male	Citizen	Maahad Tahfiz Al-Walid, No 105 Jln Ros Golf Club Bkt Beruntung	3.44971	101.561		Selangor						TAHFIZ							NEGATIF				NEGATIF
hs1268	hs1268	13	2008-02-02	Melayu	Male	Citizen	Maahad Tahfiz Al-Walid, No 105 Jln Ros Golf Club Bkt Beruntung	3.44971	101.561		Selangor						TAHFIZ							NEGATIF				NEGATIF
hs1269	hs1269	11	26/11/2010	Melayu	Male	Citizen	Maahad Tahfiz Al-Walid, No 105 Jln Ros Golf Club Bkt Beruntung	3.44971	101.561		Selangor						TAHFIZ							NEGATIF				NEGATIF
hs127	hs127	8	26/5/2013	Melayu	Female	Citizen	C-3-32 Apt Kenanga, Taman Bunga Raya, Bukit Beruntung	3.43873	101.546		Selangor									DAERAH	28.3.2020	25.3.2020	2020-02-04	NEGATIF				NEGATIF
hs1270	hs1270	11	16/5/2010	Melayu	Male	Citizen	Maahad Tahfiz Al-Walid, No 105 Jln Ros Golf Club Bkt Beruntung	3.44971	101.561		Selangor						TAHFIZ							NEGATIF				NEGATIF
hs1271	hs1271	17	81/45/01	Melayu	Male	Citizen	Maahad Tahfiz Al-Walid, No 105 Jln Ros Golf Club Bkt Beruntung	3.44971	101.561		Selangor						TAHFIZ							NEGATIF				NEGATIF
hs1272	hs1272	8	14/5/2013	Melayu	Male	Citizen	Maahad Tahfiz Al-Walid, No 105 Jln Ros Golf Club Bkt Beruntung	3.44971	101.561		Selangor						TAHFIZ							NEGATIF				NEGATIF
hs1273	hs1273	7	2014-02-02	Melayu	Male	Citizen	Maahad Tahfiz Al-Walid, No 105 Jln Ros Golf Club Bkt Beruntung	3.44971	101.561		Selangor						TAHFIZ							NEGATIF				NEGATIF
hs1274	hs1274	72	1949-04-06	Melayu	Female	Citizen	Maahad Tahfiz Al-Walid, No 105 Jln Ros Golf Club Bkt Beruntung	3.44971	101.561		Selangor						TAHFIZ							NEGATIF				NEGATIF
hs1275	hs1275	70	18/12/1950	Melayu	Female	Citizen	Maahad Tahfiz Al-Walid, No 105 Jln Ros Golf Club Bkt Beruntung	3.44971	101.561		Selangor						TAHFIZ							NEGATIF				NEGATIF
hs1276	hs1276	28	1993-08-03	Melayu	Female	Citizen	Maahad Tahfiz Al-Walid, No 105 Jln Ros Golf Club Bkt Beruntung	3.44971	101.561		Selangor						TAHFIZ							NEGATIF				NEGATIF
hs1277	hs1277	25	1996-06-08	Melayu	Female	Citizen	Maahad Tahfiz Al-Walid, No 105 Jln Ros Golf Club Bkt Beruntung	3.44971	101.561		Selangor						TAHFIZ							NEGATIF				NEGATIF
hs1278	hs1278	15	2006-12-06	Melayu	Female	Citizen	Maahad Tahfiz Al-Walid, No 105 Jln Ros Golf Club Bkt Beruntung	3.44971	101.561		Selangor						TAHFIZ							NEGATIF				NEGATIF
hs1279	hs1279	12	24/4/2009	Melayu	Female	Citizen	Maahad Tahfiz Al-Walid, No 105 Jln Ros Golf Club Bkt Beruntung	3.44971	101.561		Selangor						TAHFIZ							NEGATIF				NEGATIF
hs128	hs128	8	2013-12-06	Melayu	Female	Citizen	B-2-17 Apt Kenanga, Taman Bunga Raya, Bukit Beruntung	3.43799	101.551		Selangor									DAERAH	28.3.2020	25.3.2020	2020-02-04	NEGATIF				NEGATIF
hs1280	hs1280	11	19/9/2010	Melayu	Female	Citizen	Maahad Tahfiz Al-Walid, No 105 Jln Ros Golf Club Bkt Beruntung	3.44971	101.561		Selangor						TAHFIZ							NEGATIF				NEGATIF
hs1281	hs1281	11	2010-01-12	Melayu	Female	Citizen	Maahad Tahfiz Al-Walid, No 105 Jln Ros Golf Club Bkt Beruntung	3.44971	101.561		Selangor						TAHFIZ							NEGATIF				NEGATIF
hs1282	hs1282	11	65/42/07	Foreigner	Female	Non-citizen	Maahad Tahfiz Al-Walid, No 105 Jln Ros Golf Club Bkt Beruntung	3.44971	101.561		Selangor						TAHFIZ							NEGATIF				NEGATIF
hs1283	hs1283	6	2015-04-06	Melayu	Female	Citizen	Maahad Tahfiz Al-Walid, No 105 Jln Ros Golf Club Bkt Beruntung	3.44971	101.561		Selangor						TAHFIZ							NEGATIF				NEGATIF
hs1284	hs1284	3	29/10/2018	Melayu	Female	Citizen	Maahad Tahfiz Al-Walid, No 105 Jln Ros Golf Club Bkt Beruntung	3.44971	101.561		Selangor						TAHFIZ							NEGATIF				NEGATIF
hs1285	hs1285			Foreigner	Female	Non-citizen	Maahad Tahfiz Al-Walid, No 105 Jln Ros Golf Club Bkt Beruntung	3.44971	101.561		Selangor						TAHFIZ							NEGATIF				NEGATIF
hs1286	hs1286	55	27/11/1966	Cina	Male	Citizen	MADRASAH DARUL ATIQ, KG MELAYU RASA, BATU 34 ½ 44200 HULU SELANGOR, SELANGOR	3.52314	101.633		Selangor						TAHFIZ					12.5.2020	14.5.2020	NEGATIF				NEGATIF
hs1287	hs1287	45	14/6/1976	Melayu	Female	Citizen	MADRASAH DARUL ATIQ, KG MELAYU RASA, BATU 34 ½ 44200 HULU SELANGOR, SELANGOR	3.52314	101.633		Selangor						TAHFIZ					12.5.2020	15.5.2020	NEGATIF				NEGATIF
hs1288	hs1288	26	1995-08-05	Melayu	Male	Citizen	MADRASAH DARUL ATIQ, KG MELAYU RASA, BATU 34 ½ 44200 HULU SELANGOR, SELANGOR	3.52314	101.633		Selangor											12.5.2020	14.5.2020	NEGATIF				NEGATIF
hs1289	hs1289	21	2000-01-12	Melayu	Male	Citizen	MADRASAH DARUL ATIQ, KG MELAYU RASA, BATU 34 ½ 44200 HULU SELANGOR, SELANGOR	3.52314	101.633		Selangor											12.5.2020	14.5.2020	NEGATIF				NEGATIF
hs129	hs129	8	2013-11-03	Melayu	Male	Citizen	K-2-26 Apt Dahlia, Taman Bunga Raya, Bukit Beruntung	3.43757	101.548		Selangor									DAERAH	28.3.2020	25.3.2020	2020-02-04	NEGATIF				NEGATIF
hs1290	hs1290	17	2004-05-08	Melayu	Male	Citizen	MADRASAH DARUL ATIQ, KG MELAYU RASA, BATU 34 ½ 44200 HULU SELANGOR, SELANGOR	3.52314	101.633		Selangor											12.5.2020	14.5.2020	NEGATIF				NEGATIF
hs1291	hs1291	32	23/12/1988	Melayu	Male	Citizen	MADRASAH DARUL ATIQ, KG MELAYU RASA, BATU 34 ½ 44200 HULU SELANGOR, SELANGOR	3.52314	101.633		Selangor													NEGATIF				NEGATIF
hs1292	hs1292	32	22/3/1989	Melayu	Female	Citizen	MADRASAH DARUL ATIQ, KG MELAYU RASA, BATU 34 ½ 44200 HULU SELANGOR, SELANGOR	3.52314	101.633		Selangor											12.5.2020	14.5.2020	NEGATIF				NEGATIF
hs1293	hs1293	7	2014-10-06	Melayu	Female	Citizen	MADRASAH DARUL ATIQ, KG MELAYU RASA, BATU 34 ½ 44200 HULU SELANGOR, SELANGOR	3.52314	101.633		Selangor											12.5.2020	15.5.2020	NEGATIF				NEGATIF
hs1294	hs1294	5	29/11/2016	Melayu	Female	Citizen	MADRASAH DARUL ATIQ, KG MELAYU RASA, BATU 34 ½ 44200 HULU SELANGOR, SELANGOR	3.52314	101.633		Selangor											12.5.2020	14.5.2020	NEGATIF				NEGATIF
hs1295	hs1295	3	2018-02-11	Melayu	Male	Citizen	MADRASAH DARUL ATIQ, KG MELAYU RASA, BATU 34 ½ 44200 HULU SELANGOR, SELANGOR	3.52314	101.633		Selangor											12.5.2020	14.5.2020	NEGATIF				NEGATIF
hs1296	hs1296	37	23/1/1984	Melayu	Male	Citizen	MADRASAH DARUL ATIQ, KG MELAYU RASA, BATU 34 ½ 44200 HULU SELANGOR, SELANGOR	3.52314	101.633		Selangor											12.5.2020	14.5.2020	NEGATIF				NEGATIF
hs1297	hs1297	34	1987-08-05	Melayu	Female	Citizen	MADRASAH DARUL ATIQ, KG MELAYU RASA, BATU 34 ½ 44200 HULU SELANGOR, SELANGOR	3.52314	101.633		Selangor											12.5.2020	15.5.2020	NEGATIF				NEGATIF
hs1298	hs1298	9	29/4/2012	Melayu	Male	Citizen	MADRASAH DARUL ATIQ, KG MELAYU RASA, BATU 34 ½ 44200 HULU SELANGOR, SELANGOR	3.52314	101.633		Selangor											12.5.2020	14.5.2020	NEGATIF				NEGATIF
hs1299	hs1299	8	26/11/2013	Melayu	Female	Citizen	MADRASAH DARUL ATIQ, KG MELAYU RASA, BATU 34 ½ 44200 HULU SELANGOR, SELANGOR	3.52314	101.633		Selangor											12.5.2020	15.5.2020	NEGATIF				NEGATIF
hs13	hs13	50	1971-04-06	Melayu	Female	Citizen	NO 79, JALAN 8/4, BANDAR TASIK PUTERI, RAWANG, SELANGOR	3.28416	101.478		Selangor			STAFF UDA HOLDING (OFFICEMATE)	NO		SEKERJA					2020-04-03	2020-06-03	NEGATIF				NEGATIF
hs130	hs130	8	2013-12-09	Melayu	Male	Citizen	L-2-03A Apt Dahlia, Taman Bunga Raya, Bukit Beruntung	3.43757	101.548		Selangor									DAERAH	28.3.2020	25.3.2020	2020-02-04	NEGATIF				NEGATIF
hs1300	hs1300	5	2016-04-01	Melayu	Male	Citizen	MADRASAH DARUL ATIQ, KG MELAYU RASA, BATU 34 ½ 44200 HULU SELANGOR, SELANGOR	3.52314	101.633		Selangor											12.5.2020	14.5.2020	NEGATIF				NEGATIF
hs1301	hs1301	28	13/9/1993	Melayu	Male	Citizen	MADRASAH DARUL ATIQ, KG MELAYU RASA, BATU 34 ½ 44200 HULU SELANGOR, SELANGOR	3.52314	101.633		Selangor											12.5.2020	14.5.2020	NEGATIF				NEGATIF
hs1302	hs1302	28	21/3/1993	Melayu	Female	Citizen	MADRASAH DARUL ATIQ, KG MELAYU RASA, BATU 34 ½ 44200 HULU SELANGOR, SELANGOR	3.52314	101.633		Selangor											12.5.2020	14.5.2020	NEGATIF				NEGATIF
hs1303	hs1303	6	23/6/2015	Melayu	Male	Citizen	MADRASAH DARUL ATIQ, KG MELAYU RASA, BATU 34 ½ 44200 HULU SELANGOR, SELANGOR	3.52314	101.633		Selangor											12.5.2020	15.5.2020	NEGATIF				NEGATIF
hs1304	hs1304	5	2016-08-09	Melayu	Male	Citizen	MADRASAH DARUL ATIQ, KG MELAYU RASA, BATU 34 ½ 44200 HULU SELANGOR, SELANGOR	3.52314	101.633		Selangor											12.5.2020	15.5.2020	NEGATIF				NEGATIF
hs1305	hs1305	2	19/4/2019	Melayu	Male	Citizen	MADRASAH DARUL ATIQ, KG MELAYU RASA, BATU 34 ½ 44200 HULU SELANGOR, SELANGOR	3.52314	101.633		Selangor											12.5.2020	14.5.2020	NEGATIF				NEGATIF
hs1306	hs1306	26	20/2/1995	Melayu	Male	Citizen	MADRASAH DARUL ATIQ, KG MELAYU RASA, BATU 34 ½ 44200 HULU SELANGOR, SELANGOR	3.52314	101.633		Selangor											12.5.2020	14.5.2020	NEGATIF				NEGATIF
hs1307	hs1307	23	15/5/1998	Melayu	Female	Citizen	MADRASAH DARUL ATIQ, KG MELAYU RASA, BATU 34 ½ 44200 HULU SELANGOR, SELANGOR	3.52314	101.633		Selangor											12.5.2020	15.5.2020	NEGATIF				NEGATIF
hs1308	hs1308	3	2018-09-05	Melayu	Male	Citizen	MADRASAH DARUL ATIQ, KG MELAYU RASA, BATU 34 ½ 44200 HULU SELANGOR, SELANGOR	3.52314	101.633		Selangor											12.5.2020	14.5.2020	NEGATIF				NEGATIF
hs1309	hs1309	44	17/5/1977	Melayu	Male	Citizen	MADRASAH DARUL ATIQ, KG MELAYU RASA, BATU 34 ½ 44200 HULU SELANGOR, SELANGOR	3.52314	101.633		Selangor											12.5.2020	14.5.2020	NEGATIF				NEGATIF
hs131	hs131	8	2013-09-07	Melayu	Female	Citizen	K-4-31 Apt Kenanga, Taman Bunga Raya, Bukit Beruntung	3.43873	101.546		Selangor									DAERAH	28.3.2020	25.3.2020	2020-02-04	NEGATIF				NEGATIF
hs1310	hs1310	39	20/7/1982	Melayu	Female	Citizen	MADRASAH DARUL ATIQ, KG MELAYU RASA, BATU 34 ½ 44200 HULU SELANGOR, SELANGOR	3.52314	101.633		Selangor											12.5.2020	14.5.2020	NEGATIF				NEGATIF
hs1311	hs1311	17	24/1/2004	Melayu	Male	Citizen	MADRASAH DARUL ATIQ, KG MELAYU RASA, BATU 34 ½ 44200 HULU SELANGOR, SELANGOR	3.52314	101.633		Selangor											12.5.2020	14.5.2020	NEGATIF				NEGATIF
hs1312	hs1312	14	26/9/2007	Melayu	Male	Citizen	MADRASAH DARUL ATIQ, KG MELAYU RASA, BATU 34 ½ 44200 HULU SELANGOR, SELANGOR	3.52314	101.633		Selangor											12.5.2020	14.5.2020	NEGATIF				NEGATIF
hs1313	hs1313	11	22/11/2010	Melayu	Female	Citizen	MADRASAH DARUL ATIQ, KG MELAYU RASA, BATU 34 ½ 44200 HULU SELANGOR, SELANGOR	3.52314	101.633		Selangor											12.5.2020	14.5.2020	NEGATIF				NEGATIF
hs1314	hs1314	8	2013-01-09	Melayu	Female	Citizen	MADRASAH DARUL ATIQ, KG MELAYU RASA, BATU 34 ½ 44200 HULU SELANGOR, SELANGOR	3.52314	101.633		Selangor											12.5.2020	14.5.2020	NEGATIF				NEGATIF
hs1315	hs1315	4	21/12/2016	Melayu	Male	Citizen	MADRASAH DARUL ATIQ, KG MELAYU RASA, BATU 34 ½ 44200 HULU SELANGOR, SELANGOR	3.52314	101.633		Selangor											12.5.2020	15.5.2020	NEGATIF				NEGATIF
hs1316	hs1316	40	29/4/1981	Melayu	Male	Citizen	MADRASAH DARUL ATIQ, KG MELAYU RASA, BATU 34 ½ 44200 HULU SELANGOR, SELANGOR	3.52314	101.633		Selangor											12.5.2020	14.5.2020	NEGATIF				NEGATIF
hs1317	hs1317	35	14/3/1986	Melayu	Female	Citizen	MADRASAH DARUL ATIQ, KG MELAYU RASA, BATU 34 ½ 44200 HULU SELANGOR, SELANGOR	3.52314	101.633		Selangor											12.5.2020	14.5.2020	NEGATIF				NEGATIF
hs1318	hs1318	12	2009-02-09	Melayu	Female	Citizen	MADRASAH DARUL ATIQ, KG MELAYU RASA, BATU 34 ½ 44200 HULU SELANGOR, SELANGOR	3.52314	101.633		Selangor											12.5.2020	14.5.2020	NEGATIF				NEGATIF
hs1319	hs1319	9	14/3/2012	Melayu	Male	Citizen	MADRASAH DARUL ATIQ, KG MELAYU RASA, BATU 34 ½ 44200 HULU SELANGOR, SELANGOR	3.52314	101.633		Selangor											12.5.2020	15.5.2020	NEGATIF				NEGATIF
hs132	hs132	10	2011-04-03	Melayu	Female	Citizen	D-1-09 Apt Kemuning, Taman Bunga Raya, Bukit Beruntung	3.44477	101.553		Selangor									DAERAH	28.3.2020	25.3.2020	2020-02-04	NEGATIF				NEGATIF
hs1320	hs1320	48	25/3/1973	Melayu	Male	Citizen	MADRASAH DARUL ATIQ, KG MELAYU RASA, BATU 34 ½ 44200 HULU SELANGOR, SELANGOR	3.52314	101.633		Selangor											12.5.2020	14.5.2020	NEGATIF				NEGATIF
hs1321	hs1321	48	1973-03-07	Melayu	Female	Citizen	MADRASAH DARUL ATIQ, KG MELAYU RASA, BATU 34 ½ 44200 HULU SELANGOR, SELANGOR	3.52314	101.633		Selangor											12.5.2020	14.5.2020	NEGATIF				NEGATIF
hs1322	hs1322	21	2000-05-10	Melayu	Male	Citizen	MADRASAH DARUL ATIQ, KG MELAYU RASA, BATU 34 ½ 44200 HULU SELANGOR, SELANGOR	3.52314	101.633		Selangor											12.5.2020	14.5.2020	NEGATIF				NEGATIF
hs1323	hs1323	27	17/9/1994	Melayu	Male	Citizen	MADRASAH DARUL ATIQ, KG MELAYU RASA, BATU 34 ½ 44200 HULU SELANGOR, SELANGOR	3.52314	101.633		Selangor											12.5.2020	14.5.2020	NEGATIF				NEGATIF
hs1324	hs1324	23	28/4/1998	Melayu	Female	Citizen	MADRASAH DARUL ATIQ, KG MELAYU RASA, BATU 34 ½ 44200 HULU SELANGOR, SELANGOR	3.52314	101.633		Selangor											12.5.2020	14.5.2020	NEGATIF				NEGATIF
hs1325	hs1325	43	1978-07-11	Melayu	Male	Citizen	MADRASAH DARUL ATIQ, KG MELAYU RASA, BATU 34 ½ 44200 HULU SELANGOR, SELANGOR	3.52314	101.633		Selangor											12.5.2020	14.5.2020	NEGATIF				NEGATIF
hs1326	hs1326	36	27/11/1985	Melayu	Female	Citizen	MADRASAH DARUL ATIQ, KG MELAYU RASA, BATU 34 ½ 44200 HULU SELANGOR, SELANGOR	3.52314	101.633		Selangor											12.5.2020	14.5.2020	NEGATIF				NEGATIF
hs1327	hs1327	15	2006-02-08	Melayu	Female	Citizen	MADRASAH DARUL ATIQ, KG MELAYU RASA, BATU 34 ½ 44200 HULU SELANGOR, SELANGOR	3.52314	101.633		Selangor											12.5.2020	14.5.2020	NEGATIF				NEGATIF
hs1328	hs1328	11	2010-01-12	Melayu	Female	Citizen	MADRASAH DARUL ATIQ, KG MELAYU RASA, BATU 34 ½ 44200 HULU SELANGOR, SELANGOR	3.52314	101.633		Selangor											12.5.2020	14.5.2020	NEGATIF				NEGATIF
hs1329	hs1329	8	17/8/2013	Melayu	Female	Citizen	MADRASAH DARUL ATIQ, KG MELAYU RASA, BATU 34 ½ 44200 HULU SELANGOR, SELANGOR	3.52314	101.633		Selangor											12.5.2020	14.5.2020	NEGATIF				NEGATIF
hs133	hs133	13	2008-05-05	Melayu	Male	Citizen	No 22, Jalan Inai 4, Bukit Beruntung	3.43043	101.559		Selangor									DAERAH	28.3.2020	25.3.2020	2020-02-04	NEGATIF				NEGATIF
hs1330	hs1330	3	2018-12-07	Melayu	Female	Citizen	MADRASAH DARUL ATIQ, KG MELAYU RASA, BATU 34 ½ 44200 HULU SELANGOR, SELANGOR	3.52314	101.633		Selangor											12.5.2020	14.5.2020	NEGATIF				NEGATIF
hs1331	hs1331	44	31/3/1977	Melayu	Female	Citizen	MADRASAH DARUL ATIQ, KG MELAYU RASA, BATU 34 ½ 44200 HULU SELANGOR, SELANGOR	3.52314	101.633		Selangor											12.5.2020	14.5.2020	NEGATIF				NEGATIF
hs1332	hs1332	15	27/10/2006	Melayu	Female	Citizen	MADRASAH DARUL ATIQ, KG MELAYU RASA, BATU 34 ½ 44200 HULU SELANGOR, SELANGOR	3.52314	101.633		Selangor											12.5.2020	14.5.2020	NEGATIF				NEGATIF
hs1333	hs1333	13	2008-12-04	Melayu	Female	Citizen	MADRASAH DARUL ATIQ, KG MELAYU RASA, BATU 34 ½ 44200 HULU SELANGOR, SELANGOR	3.52314	101.633		Selangor											12.5.2020	14.5.2020	NEGATIF				NEGATIF
hs1334	hs1334	15	20/12/2005	Cina	Male	Citizen	MADRASAH DARUL ATIQ, KG MELAYU RASA, BATU 34 ½ 44200 HULU SELANGOR, SELANGOR	3.52314	101.633		Selangor											21.4.2020	22.4.2020	NEGATIF				NEGATIF
hs1335	hs1335	52	15/11/1969	Melayu	Male	Citizen	MADRASAH DARUL ATIQ, KG MELAYU RASA, BATU 34 ½ 44200 HULU SELANGOR, SELANGOR	3.52314	101.633		Selangor											12.5.2020	14.5.2020	NEGATIF				NEGATIF
hs1336	hs1336	51	1970-01-02	Melayu	Female	Citizen	MADRASAH DARUL ATIQ, KG MELAYU RASA, BATU 34 ½ 44200 HULU SELANGOR, SELANGOR	3.52314	101.633		Selangor											12.5.2020	15.5.2020	NEGATIF				NEGATIF
hs1337	hs1337	55	1966-10-05	Melayu	Male	Citizen	MADRASAH DARUL ATIQ, KG MELAYU RASA, BATU 34 ½ 44200 HULU SELANGOR, SELANGOR	3.52314	101.633		Selangor											12.5.2020	14.5.2020	NEGATIF				NEGATIF
hs1338	hs1338	48	17/4/1973	Melayu	Female	Citizen	MADRASAH DARUL ATIQ, KG MELAYU RASA, BATU 34 ½ 44200 HULU SELANGOR, SELANGOR	3.52314	101.633		Selangor											12.5.2020	15.5.2020	NEGATIF				NEGATIF
hs1339	hs1339	72	1949-10-10	Melayu	Male	Citizen	MADRASAH DARUL ATIQ, KG MELAYU RASA, BATU 34 ½ 44200 HULU SELANGOR, SELANGOR	3.52314	101.633		Selangor											12.5.2020	14.5.2020	NEGATIF				NEGATIF
hs134	hs134	8	24/3/2013	Melayu	Male	Citizen	L-3-20 Apt Kenanga, Taman Bunga Raya, Bukit Beruntung	3.43873	101.546		Selangor									DAERAH	28.3.2020	25.3.2020	2020-02-04	NEGATIF				NEGATIF
hs1340	hs1340	67	1954-10-10	Melayu	Female	Citizen	MADRASAH DARUL ATIQ, KG MELAYU RASA, BATU 34 ½ 44200 HULU SELANGOR, SELANGOR	3.52314	101.633		Selangor											12.5.2020	15.5.2020	NEGATIF				NEGATIF
hs1341	hs1341	22	28/12/1998	Melayu	Male	Citizen	MADRASAH DARUL ATIQ, KG MELAYU RASA, BATU 34 ½ 44200 HULU SELANGOR, SELANGOR	3.52314	101.633		Selangor											12.5.2020	14.5.2020	NEGATIF				NEGATIF
hs1342	hs1342	45	30/4/1976	Melayu	Female	Citizen	MADRASAH DARUL ATIQ, KG MELAYU RASA, BATU 34 ½ 44200 HULU SELANGOR, SELANGOR	3.52314	101.633		Selangor											12.5.2020	15.5.2020	NEGATIF				NEGATIF
hs1343	hs1343	47	15/6/1974	Melayu	Male	Citizen	MADRASAH DARUL ATIQ, KG MELAYU RASA, BATU 34 ½ 44200 HULU SELANGOR, SELANGOR	3.52314	101.633		Selangor											12.5.2020	15.5.2020	NEGATIF				NEGATIF
hs1344	hs1344	42	1979-02-10	Melayu	Female	Citizen	MADRASAH DARUL ATIQ, KG MELAYU RASA, BATU 34 ½ 44200 HULU SELANGOR, SELANGOR	3.52314	101.633		Selangor											12.5.2020	15.5.2020	NEGATIF				NEGATIF
hs1345	hs1345	21	2000-11-02	Melayu	Male	Citizen	MADRASAH DARUL ATIQ, KG MELAYU RASA, BATU 34 ½ 44200 HULU SELANGOR, SELANGOR	3.52314	101.633		Selangor											5.5.2020	8.5.2020	NEGATIF				NEGATIF
hs1346	hs1346	15	14/3/2006	Melayu	Female	Citizen	MADRASAH DARUL ATIQ, KG MELAYU RASA, BATU 34 ½ 44200 HULU SELANGOR, SELANGOR	3.52314	101.633		Selangor						TAHFIZ					12.5.2020	14.5.2021	NEGATIF				NEGATIF
hs1347	hs1347	12	2009-04-12	Melayu	Male	Citizen	MADRASAH DARUL ATIQ, KG MELAYU RASA, BATU 34 ½ 44200 HULU SELANGOR, SELANGOR	3.52314	101.633		Selangor						TAHFIZ					12.5.2020	15.5.2021	NEGATIF				NEGATIF
hs1348	hs1348	43	28/11/1978	Melayu	Male	Citizen	MADRASAH DARUL ATIQ, KG MELAYU RASA, BATU 34 ½ 44200 HULU SELANGOR, SELANGOR	3.52314	101.633		Selangor											12.5.2020	14.5.2020	NEGATIF				NEGATIF
hs1349	hs1349	35	14/3/1986	Melayu	Female	Citizen	MADRASAH DARUL ATIQ, KG MELAYU RASA, BATU 34 ½ 44200 HULU SELANGOR, SELANGOR	3.52314	101.633		Selangor											12.5.2020	14.5.2020	NEGATIF				NEGATIF
hs135	hs135	8	15/3/2013	Melayu	Female	Citizen	M-G-29 Apt dahlia, Taman Bunga Raya, Bukit Beruntung	3.43799	101.551		Selangor									DAERAH	28.3.2020	25.3.2020	2020-02-04	NEGATIF				NEGATIF
hs1350	hs1350	15	2006-04-03	Melayu	Female	Citizen	MADRASAH DARUL ATIQ, KG MELAYU RASA, BATU 34 ½ 44200 HULU SELANGOR, SELANGOR	3.52314	101.633		Selangor											12.5.2020	14.5.2020	NEGATIF				NEGATIF
hs1351	hs1351	14	2007-03-06	Melayu	Female	Citizen	MADRASAH DARUL ATIQ, KG MELAYU RASA, BATU 34 ½ 44200 HULU SELANGOR, SELANGOR	3.52314	101.633		Selangor													NEGATIF				NEGATIF
hs1352	hs1352	10	22/6/2011	Melayu	Male	Citizen	MADRASAH DARUL ATIQ, KG MELAYU RASA, BATU 34 ½ 44200 HULU SELANGOR, SELANGOR	3.52314	101.633		Selangor											12.5.2020	14.5.2020	NEGATIF				NEGATIF
hs1353	hs1353	46	23/8/1975	Melayu	Male	Citizen	MADRASAH DARUL ATIQ, KG MELAYU RASA, BATU 34 ½ 44200 HULU SELANGOR, SELANGOR	3.52314	101.633		Selangor											12.5.2020	15.5.2021	NEGATIF				NEGATIF
hs1354	hs1354	28	1993-12-10	Melayu	Female	Citizen	MADRASAH DARUL ATIQ, KG MELAYU RASA, BATU 34 ½ 44200 HULU SELANGOR, SELANGOR	3.52314	101.633		Selangor											12.5.2020	14.5.2020	NEGATIF				NEGATIF
hs1355	hs1355	9	2012-02-03	Melayu	Female	Citizen	MADRASAH DARUL ATIQ, KG MELAYU RASA, BATU 34 ½ 44200 HULU SELANGOR, SELANGOR	3.52314	101.633		Selangor											12.5.2020	14.5.2020	NEGATIF				NEGATIF
hs1356	hs1356	8	19/8/2013	Melayu	Male	Citizen	MADRASAH DARUL ATIQ, KG MELAYU RASA, BATU 34 ½ 44200 HULU SELANGOR, SELANGOR	3.52314	101.633		Selangor											12.5.2020	14.5.2020	NEGATIF				NEGATIF
hs1357	hs1357	57	30/7/1964	Melayu	Male	Citizen	MADRASAH DARUL ATIQ, KG MELAYU RASA, BATU 34 ½ 44200 HULU SELANGOR, SELANGOR	3.52314	101.633		Selangor											12.5.2020	15.5.2021	NEGATIF				NEGATIF
hs1358	hs1358	53	1968-02-03	Melayu	Female	Citizen	MADRASAH DARUL ATIQ, KG MELAYU RASA, BATU 34 ½ 44200 HULU SELANGOR, SELANGOR	3.52314	101.633		Selangor											12.5.2020	14.5.2021	NEGATIF				NEGATIF
hs1359	hs1359	24	16/2/1997	Melayu	Female	Citizen	MADRASAH DARUL ATIQ, KG MELAYU RASA, BATU 34 ½ 44200 HULU SELANGOR, SELANGOR	3.52314	101.633		Selangor											12.5.2020	15.5.2021	NEGATIF				NEGATIF
hs136	hs136	8	23/1/2013	Melayu	Female	Citizen	D-1-34 Apt Cempaka, Taman Bunga Raya, Bukit Beruntung	3.43939	101.55		Selangor									DAERAH	28.3.2020	25.3.2020	2020-02-04	NEGATIF				NEGATIF
hs1360	hs1360	17	2004-01-05	Melayu	Female	Citizen	MADRASAH DARUL ATIQ, KG MELAYU RASA, BATU 34 ½ 44200 HULU SELANGOR, SELANGOR	3.52314	101.633		Selangor											12.5.2020	14.5.2020	NEGATIF				NEGATIF
hs1361	hs1361	33	1988-04-11	Melayu	Male	Citizen	MADRASAH DARUL ATIQ, KG MELAYU RASA, BATU 34 ½ 44200 HULU SELANGOR, SELANGOR	3.52314	101.633		Selangor											12.5.2020	14.5.2020	NEGATIF				NEGATIF
hs1362	hs1362	28	28/4/1993	Melayu	Female	Citizen	MADRASAH DARUL ATIQ, KG MELAYU RASA, BATU 34 ½ 44200 HULU SELANGOR, SELANGOR	3.52314	101.633		Selangor						TAHFIZ					12.5.2020	14.5.2021	NEGATIF				NEGATIF
hs1363	hs1363	8	2013-07-11	Melayu	Male	Citizen	MADRASAH DARUL ATIQ, KG MELAYU RASA, BATU 34 ½ 44200 HULU SELANGOR, SELANGOR	3.52314	101.633		Selangor						TAHFIZ					12.5.2020	15.5.2021	NEGATIF				NEGATIF
hs1364	hs1364	6	25/7/2015	Melayu	Female	Citizen	MADRASAH DARUL ATIQ, KG MELAYU RASA, BATU 34 ½ 44200 HULU SELANGOR, SELANGOR	3.52314	101.633		Selangor											12.5.2020	14.5.2020	NEGATIF				NEGATIF
hs1365	hs1365	3	20/1/2018	Melayu	Male	Citizen	MADRASAH DARUL ATIQ, KG MELAYU RASA, BATU 34 ½ 44200 HULU SELANGOR, SELANGOR	3.52314	101.633		Selangor											12.5.2020	14.5.2020	NEGATIF				NEGATIF
hs1366	hs1366	36	29/11/1985	Melayu	Male	Citizen	MADRASAH DARUL ATIQ, KG MELAYU RASA, BATU 34 ½ 44200 HULU SELANGOR, SELANGOR	3.52314	101.633		Selangor											12.5.2020	14.5.2020	NEGATIF				NEGATIF
hs1367	hs1367	29	1992-05-10	Melayu	Female	Citizen	MADRASAH DARUL ATIQ, KG MELAYU RASA, BATU 34 ½ 44200 HULU SELANGOR, SELANGOR	3.52314	101.633		Selangor													NEGATIF				NEGATIF
hs1368	hs1368	9	2012-04-03	Melayu	Female	Citizen	MADRASAH DARUL ATIQ, KG MELAYU RASA, BATU 34 ½ 44200 HULU SELANGOR, SELANGOR	3.52314	101.633		Selangor											12.5.2020	14.5.2020	NEGATIF				NEGATIF
hs1369	hs1369	8	20/5/2013	Melayu	Male	Citizen	MADRASAH DARUL ATIQ, KG MELAYU RASA, BATU 34 ½ 44200 HULU SELANGOR, SELANGOR	3.52314	101.633		Selangor											12.5.2020	15.5.2021	NEGATIF				NEGATIF
hs137	hs137	9	16/4/2012	Melayu	Male	Citizen	No 4, Jalan Inai 7, Bukit Beruntung	3.42946	101.56		Selangor									DAERAH	28.3.2020	25.3.2020	2020-02-04	NEGATIF				NEGATIF
hs1370	hs1370	6	13/5/2015	Melayu	Male	Citizen	MADRASAH DARUL ATIQ, KG MELAYU RASA, BATU 34 ½ 44200 HULU SELANGOR, SELANGOR	3.52314	101.633		Selangor											12.5.2020	14.5.2020	NEGATIF				NEGATIF
hs1371	hs1371	5	29/8/2016	Melayu	Female	Citizen	MADRASAH DARUL ATIQ, KG MELAYU RASA, BATU 34 ½ 44200 HULU SELANGOR, SELANGOR	3.52314	101.633		Selangor											12.5.2020	14.5.2020	NEGATIF				NEGATIF
hs1372	hs1372	49	19/9/1972	Melayu	Female	Citizen	MADRASAH DARUL ATIQ, KG MELAYU RASA, BATU 34 ½ 44200 HULU SELANGOR, SELANGOR	3.52314	101.633		Selangor											12.5.2020	14.5.2020	NEGATIF				NEGATIF
hs1373	hs1373	24	23/5/1997	Melayu	Male	Citizen	MADRASAH DARUL ATIQ, KG MELAYU RASA, BATU 34 ½ 44200 HULU SELANGOR, SELANGOR	3.52314	101.633		Selangor											12.5.2020	15.5.2021	NEGATIF				NEGATIF
hs1374	hs1374	30	1991-03-04	Melayu	Male	Citizen	MADRASAH DARUL ATIQ, KG MELAYU RASA, BATU 34 ½ 44200 HULU SELANGOR, SELANGOR	3.52314	101.633		Selangor											12.5.2020	14.5.2021	NEGATIF				NEGATIF
hs1375	hs1375	26	1995-11-11	Melayu	Female	Citizen	MADRASAH DARUL ATIQ, KG MELAYU RASA, BATU 34 ½ 44200 HULU SELANGOR, SELANGOR	3.52314	101.633		Selangor											12.5.2020	15.5.2021	NEGATIF				NEGATIF
hs1376	hs1376	5	2016-12-02	Melayu	Female	Citizen	MADRASAH DARUL ATIQ, KG MELAYU RASA, BATU 34 ½ 44200 HULU SELANGOR, SELANGOR	3.52314	101.633		Selangor											12.5.2020	14.5.2020	NEGATIF				NEGATIF
hs1377	hs1377	2	2019-07-03	Melayu	Male	Citizen	MADRASAH DARUL ATIQ, KG MELAYU RASA, BATU 34 ½ 44200 HULU SELANGOR, SELANGOR	3.52314	101.633		Selangor											12.5.2020	14.5.2020	NEGATIF				NEGATIF
hs1378	hs1378	34	1987-09-01	Melayu	Male	Citizen	MADRASAH DARUL ATIQ, KG MELAYU RASA, BATU 34 ½ 44200 HULU SELANGOR, SELANGOR	3.52314	101.633		Selangor											12.5.2020	14.5.2020	NEGATIF				NEGATIF
hs1379	hs1379	32	15/8/1989	Melayu	Female	Citizen	MADRASAH DARUL ATIQ, KG MELAYU RASA, BATU 34 ½ 44200 HULU SELANGOR, SELANGOR	3.52314	101.633		Selangor											12.5.2020	15.5.2020	NEGATIF				NEGATIF
hs138	hs138	8	27/9/2013	Melayu	Female	Citizen	F-2-12 Apt Cempaka, Taman Bunga Raya, Bukit Beruntung	3.43939	101.55		Selangor									DAERAH	28.3.2020	25.3.2020	2020-02-04	NEGATIF				NEGATIF
hs1380	hs1380	3	2018-05-01	Melayu	Female	Citizen	MADRASAH DARUL ATIQ, KG MELAYU RASA, BATU 34 ½ 44200 HULU SELANGOR, SELANGOR	3.52314	101.633		Selangor											12.5.2020	15.5.2020	NEGATIF				NEGATIF
hs1381	hs1381	2	2019-01-08	Melayu	Male	Citizen	MADRASAH DARUL ATIQ, KG MELAYU RASA, BATU 34 ½ 44200 HULU SELANGOR, SELANGOR	3.52314	101.633		Selangor											12.5.2020	15.5.2020	NEGATIF				NEGATIF
hs1382	hs1382	47	20/12/1973	Melayu	Male	Citizen	MADRASAH DARUL ATIQ, KG MELAYU RASA, BATU 34 ½ 44200 HULU SELANGOR, SELANGOR	3.52314	101.633		Selangor											12.5.2020	14.5.2020	NEGATIF				NEGATIF
hs1383	hs1383			Foreigner	Female	Non-citizen	MADRASAH DARUL ATIQ, KG MELAYU RASA, BATU 34 ½ 44200 HULU SELANGOR, SELANGOR	3.52314	101.633		Selangor													NEGATIF				NEGATIF
hs1384	hs1384	24	29/5/1997	Melayu	Male	Citizen	MADRASAH DARUL ATIQ, KG MELAYU RASA, BATU 34 ½ 44200 HULU SELANGOR, SELANGOR	3.52314	101.633		Selangor											12.5.2020	14.5.2020	NEGATIF				NEGATIF
hs1385	hs1385			Foreigner	Male	Non-citizen	MADRASAH DARUL ATIQ, KG MELAYU RASA, BATU 34 ½ 44200 HULU SELANGOR, SELANGOR	3.52314	101.633		Selangor											12.5.2020	14.5.2020	NEGATIF				NEGATIF
hs1386	hs1386	9	25/12/2011	Melayu	Female	Citizen	MADRASAH DARUL ATIQ, KG MELAYU RASA, BATU 34 ½ 44200 HULU SELANGOR, SELANGOR	3.52314	101.633		Selangor											12.5.2020	14.5.2020	NEGATIF				NEGATIF
hs1387	hs1387	38	13/8/1983	Melayu	Male	Citizen	MADRASAH DARUL ATIQ, KG MELAYU RASA, BATU 34 ½ 44200 HULU SELANGOR, SELANGOR	3.52314	101.633		Selangor		WARDEN DARUL ATIQ									12.5.2020	14.5.2020	NEGATIF				NEGATIF
hs1388	hs1388	38	27/7/1983	Melayu	Male	Citizen	MADRASAH DARUL ATIQ, KG MELAYU RASA, BATU 34 ½ 44200 HULU SELANGOR, SELANGOR	3.52314	101.633		Selangor		WARDEN DARUL ATIQ									12.5.2020	14.5.2020	NEGATIF				NEGATIF
hs1389	hs1389	36	13/5/1985	Melayu	Male	Citizen	MADRASAH DARUL ATIQ, KG MELAYU RASA, BATU 34 ½ 44200 HULU SELANGOR, SELANGOR	3.52314	101.633		Selangor		WARDEN DARUL ATIQ									12.5.2020	14.5.2020	NEGATIF				NEGATIF
hs139	hs139	8	15/5/2013	Melayu	Male	Citizen	M-3-38 Apt Kenanga, Taman Bunga raya, Bukit Beruntung	3.43873	101.546		Selangor									DAERAH	28.3.2020	25.3.2020	2.4.2020	NEGATIF				NEGATIF
hs1390	hs1390	29	1992-02-06	Melayu	Male	Citizen	MADRASAH DARUL ATIQ, KG MELAYU RASA, BATU 34 ½ 44200 HULU SELANGOR, SELANGOR	3.52314	101.633		Selangor		GURU									12.5.2020	15.5.2020	NEGATIF				NEGATIF
hs1391	hs1391	32	30/1/1989	Melayu	Male	Citizen	MADRASAH DARUL ATIQ, KG MELAYU RASA, BATU 34 ½ 44200 HULU SELANGOR, SELANGOR	3.52314	101.633		Selangor		WARDEN DARUL ATIQ									12.5.2020	15.5.2020	NEGATIF				NEGATIF
hs1392	hs1392	32	27/10/1989	Melayu	Male	Citizen	MADRASAH DARUL ATIQ, KG MELAYU RASA, BATU 34 ½ 44200 HULU SELANGOR, SELANGOR	3.52314	101.633		Selangor		PELAJAR									12.5.2020	15.5.2020	NEGATIF				NEGATIF
hs1393	hs1393	28	16/12/1992	Melayu	Male	Citizen	MADRASAH DARUL ATIQ, KG MELAYU RASA, BATU 34 ½ 44200 HULU SELANGOR, SELANGOR	3.52314	101.633		Selangor		PELAJAR											NEGATIF				NEGATIF
hs1394	hs1394	55	1966-10-06	Melayu	Male	Citizen	MADRASAH DARUL ATIQ, KG MELAYU RASA, BATU 34 ½ 44200 HULU SELANGOR, SELANGOR	3.52314	101.633		Selangor		PELAJAR									12.5.2020	14.5.2020	NEGATIF				NEGATIF
hs1395	hs1395	26	28/9/1995	Melayu	Male	Citizen	MADRASAH DARUL ATIQ, KG MELAYU RASA, BATU 34 ½ 44200 HULU SELANGOR, SELANGOR	3.52314	101.633		Selangor		PELAJAR											NEGATIF				NEGATIF
hs1396	hs1396	29	23/1/1992	Melayu	Male	Citizen	MADRASAH DARUL ATIQ, KG MELAYU RASA, BATU 34 ½ 44200 HULU SELANGOR, SELANGOR	3.52314	101.633		Selangor		GURU									12.5.2020	14.5.2020	NEGATIF				NEGATIF
hs1397	hs1397			Melayu	Male	Citizen	MADRASAH DARUL ATIQ, KG MELAYU RASA, BATU 34 ½ 44200 HULU SELANGOR, SELANGOR	3.52314	101.633		Selangor		GURU											NEGATIF				NEGATIF
hs1398	hs1398	53	1968-10-01	Melayu	Male	Citizen	RAUDATUL ULUM, KG ULU RENING, 44300 BATANG KALI HULU SELANGOR	3.47965	101.689		Selangor											12.5.2020	14.5.2020	NEGATIF				NEGATIF
hs1399	hs1399	46	24/7/1975	Melayu	Female	Citizen	RAUDATUL ULUM, KG ULU RENING, 44300 BATANG KALI HULU SELANGOR	3.47965	101.689		Selangor											12.5.2020	14.5.2020	NEGATIF				NEGATIF
hs14	hs14	50	29/4/1971	Melayu	Female	Citizen	NO 38, JALAN SUA-DAMAI 2/2, BANDAR TUN HUSSEIN ONN, CHERAS	3.05189	101.758		Selangor			STAFF UDA HOLDING (OFFICEMATE)	YES		SEKERJA				2020-03-03	2020-05-03	2020-07-03	NEGATIF				NEGATIF
hs140	hs140	9	23/3/2012	Melayu	Male	Citizen	M-1-35 Apt Dahlia, Taman Bunga Raya, Bukit Beruntung	3.43799	101.551		Selangor									DAERAH	28.3.2020	25.3.2020	2020-02-04	NEGATIF				NEGATIF
hs1400	hs1400	28	25/3/1993	Melayu	Male	Citizen	RAUDATUL ULUM, KG ULU RENING, 44300 BATANG KALI HULU SELANGOR	3.47965	101.689		Selangor											12.5.2020	15.5.2020	NEGATIF				NEGATIF
hs1401	hs1401	27	22/4/1994	Melayu	Female	Citizen	RAUDATUL ULUM, KG ULU RENING, 44300 BATANG KALI HULU SELANGOR	3.47965	101.689		Selangor											12.5.2020	14.5.2020	NEGATIF				NEGATIF
hs1402	hs1402	30	15/3/1991	Melayu	Male	Citizen	RAUDATUL ULUM, KG ULU RENING, 44300 BATANG KALI HULU SELANGOR	3.47965	101.689		Selangor											12.5.2020	15.5.2020	NEGATIF				NEGATIF
hs1403	hs1403	29	1992-03-04	Melayu	Female	Citizen	RAUDATUL ULUM, KG ULU RENING, 44300 BATANG KALI HULU SELANGOR	3.47965	101.689		Selangor											12.5.2020	15.5.2020	NEGATIF				NEGATIF
hs1404	hs1404	5	21/8/2016	Melayu	Male	Citizen	RAUDATUL ULUM, KG ULU RENING, 44300 BATANG KALI HULU SELANGOR	3.47965	101.689		Selangor											12.5.2020	14.5.2020	NEGATIF				NEGATIF
hs1405	hs1405			Melayu	Male	Citizen	RAUDATUL ULUM, KG ULU RENING, 44300 BATANG KALI HULU SELANGOR	3.47965	101.689		Selangor													NEGATIF				NEGATIF
hs1406	hs1406	46	1975-01-03	Melayu	Male	Citizen	RAUDATUL ULUM, KG ULU RENING, 44300 BATANG KALI HULU SELANGOR	3.47965	101.689		Selangor											12.5.2020	14.5.2020	NEGATIF				NEGATIF
hs1407	hs1407	37	1984-06-05	Melayu	Female	Citizen	RAUDATUL ULUM, KG ULU RENING, 44300 BATANG KALI HULU SELANGOR	3.47965	101.689		Selangor											12.5.2020	15.5.2020	NEGATIF				NEGATIF
hs1408	hs1408	11	2010-11-07	Melayu	Female	Citizen	RAUDATUL ULUM, KG ULU RENING, 44300 BATANG KALI HULU SELANGOR	3.47965	101.689		Selangor											12.5.2020	15.5.2020	NEGATIF				NEGATIF
hs1409	hs1409	9	29/3/2012	Melayu	Male	Citizen	RAUDATUL ULUM, KG ULU RENING, 44300 BATANG KALI HULU SELANGOR	3.47965	101.689		Selangor											12.5.2020	14.5.2020	NEGATIF				NEGATIF
hs141	hs141	8	22/5/2013	Bumiputera	Male	Citizen	N-2-23 Apt Kenanga, Taman Bunga Raya, Bukit Beruntung	3.43799	101.551		Selangor									DAERAH	28.3.2020	25.3.2020	2020-02-04	NEGATIF				NEGATIF
hs1410	hs1410	6	2015-06-06	Melayu	Female	Citizen	RAUDATUL ULUM, KG ULU RENING, 44300 BATANG KALI HULU SELANGOR	3.47965	101.689		Selangor											12.5.2020	15.5.2020	NEGATIF				NEGATIF
hs1411	hs1411	5	2016-06-06	Melayu	Female	Citizen	RAUDATUL ULUM, KG ULU RENING, 44300 BATANG KALI HULU SELANGOR	3.47965	101.689		Selangor											12.5.2020	15.5.2020	NEGATIF				NEGATIF
hs1412	hs1412	4	2017-02-12	Melayu	Female	Citizen	RAUDATUL ULUM, KG ULU RENING, 44300 BATANG KALI HULU SELANGOR	3.47965	101.689		Selangor											12.5.2020	15.5.2020	NEGATIF				NEGATIF
hs1413	hs1413	31	1990-06-08	Melayu	Male	Citizen	RAUDATUL ULUM, KG ULU RENING, 44300 BATANG KALI HULU SELANGOR	3.47965	101.689		Selangor											12.5.2020	14.5.2020	NEGATIF				NEGATIF
hs1414	hs1414	23	28/7/1998	Melayu	Female	Citizen	RAUDATUL ULUM, KG ULU RENING, 44300 BATANG KALI HULU SELANGOR	3.47965	101.689		Selangor											12.5.2020	15.5.2020	NEGATIF				NEGATIF
hs1415	hs1415	44	1977-05-03	Melayu	Female	Citizen	RAUDATUL ULUM, KG ULU RENING, 44300 BATANG KALI HULU SELANGOR	3.47965	101.689		Selangor													NEGATIF				NEGATIF
hs1416	hs1416	21	2000-05-10	Melayu	Female	Citizen	RAUDATUL ULUM, KG ULU RENING, 44300 BATANG KALI HULU SELANGOR	3.47965	101.689		Selangor											12.5.2020	15.5.2020	NEGATIF				NEGATIF
hs1417	hs1417	19	2002-04-04	Melayu	Female	Citizen	RAUDATUL ULUM, KG ULU RENING, 44300 BATANG KALI HULU SELANGOR	3.47965	101.689		Selangor											12.5.2020	15.5.2020	NEGATIF				NEGATIF
hs1418	hs1418	12	22/11/2009	Melayu	Male	Citizen	RAUDATUL ULUM, KG ULU RENING, 44300 BATANG KALI HULU SELANGOR	3.47965	101.689		Selangor													NEGATIF				NEGATIF
hs1419	hs1419	3	26/8/2018	Melayu	Female	Citizen	RAUDATUL ULUM, KG ULU RENING, 44300 BATANG KALI HULU SELANGOR	3.47965	101.689		Selangor											12.5.2020	15.5.2020	NEGATIF				NEGATIF
hs142	hs142	9	26/6/2012	Melayu	Female	Citizen	Q-1-16 Apt Dahlia, Taman Bunga Raya, Bukit Beruntung	3.43799	101.551		Selangor									DAERAH	28.3.2020	25.3.2020	2020-02-04	NEGATIF				NEGATIF
hs1420	hs1420	54	29/9/1967	Melayu	Male	Citizen	Madrasah Darul Atiq Kg Melayu Rasa Batu 34 ½, Hulu Selangor Selangor, Malaysia	3.52314	101.633		Selangor											12.5.2020	14.5.2020	NEGATIF				NEGATIF
hs1421	hs1421	24	24/12/1996	Melayu	Male	Citizen	Madrasah Darul Atiq Kg Melayu Rasa Batu 34 ½, Hulu Selangor Selangor, Malaysia	3.52314	101.633		Selangor											12.5.2020	14.5.2020	NEGATIF				NEGATIF
hs1422	hs1422	41	1980-03-10	Melayu	Male	Citizen	Madrasah Darul Atiq Kg Melayu Rasa Batu 34 ½, 44200 Hulu Selangor Selangor, Malaysia	3.52314	101.633		Selangor											12.5.2020	14.5.2020	NEGATIF				NEGATIF
hs1423	hs1423	7	15/4/2014	Melayu	Male	Citizen	Madrasah Darul Atiq Kg Melayu Rasa Batu 34 Â½, Hulu Selangor Selangor, Malaysia	3.52314	101.633		Selangor											12.5.2020	14.5.2020	NEGATIF				NEGATIF
hs1424	hs1424	46	1975-06-03	Melayu	Male	Citizen	Madrasah Darul Atiq Kg Melayu Rasa Batu 34 ½, Hulu Selangor Selangor, Malaysia	3.52314	101.633		Selangor											12.5.2020	14.5.2020	NEGATIF				NEGATIF
hs1425	hs1425	63	22/3/1958	Melayu	Male	Citizen	Madrasah Darul Atiq Kg Melayu Rasa Batu 34 ½, Hulu Selangor Selangor, Malaysia	3.52314	101.633		Selangor											12.5.2020	14.5.2020	NEGATIF				NEGATIF
hs1426	hs1426	55	1966-10-09	Melayu	Male	Citizen	Madrasah Darul Atiq Kg Melayu Rasa Batu 34 ½, Hulu Selangor Selangor, Malaysia	3.52314	101.633		Selangor											12.5.2020	14.5.2020	NEGATIF				NEGATIF
hs1427	hs1427	26	18/7/1995	Melayu	Male	Citizen	Maahad Darul Atiq, Hulu Selangor Selangor, Malaysia, Hulu Selangor Selangor, Malaysia	3.52314	101.633		Selangor											12.5.2020	14.5.2020	NEGATIF				NEGATIF
hs1428	hs1428	30	24/6/1991	Melayu	Male	Citizen	Maahad Darul Atiq, Hulu Selangor Selangor, Malaysia, Hulu Selangor Selangor, Malaysia	3.52314	101.633		Selangor											12.5.2020	14.5.2020	NEGATIF				NEGATIF
hs1429	hs1429	31	17/4/1990	Melayu	Male	Citizen	Raudatul Ulum Kg Ulu Rening 44300 Batang Kali Hulu Selangor, Hulu Selangor Selangor, Malaysia	3.47965	101.689		Selangor											12.5.2020	14.5.2020	NEGATIF				NEGATIF
hs143	hs143	8	20/9/2013	Melayu	Male	Citizen	K-1-17 Apt Anggerik, Taman Bunga Raya, Bukit Beruntung	3.44636	101.547		Selangor									DAERAH	28.3.2020	25.3.2020	3.4.2020	NEGATIF				NEGATIF
hs1430	hs1430	7	20/8/2014	Melayu	Male	Citizen	Raudatul Ulum Kg Ulu Rening 44300 Batang Kali Hulu Selangor, Hulu Selangor Selangor, Malaysia	3.47965	101.689		Selangor											12.5.2020	14.5.2020	NEGATIF				NEGATIF
hs1431	hs1431	32	1989-11-02	Melayu	Male	Citizen	Madrasah Darul Atiq Kg Melayu Rasa Batu 34 ½ 44200 Hulu Selangor Selangor, Hulu Selangor Selangor, Malaysia	3.52314	101.633		Selangor											12.5.2020	14.5.2020	NEGATIF				NEGATIF
hs1432	hs1432	54	1967-11-01	Melayu	Female	Citizen	Madrasah Darul Atiq Kg Melayu Rasa Batu 34 ½ 44200 Hulu Selangor Selangor, Hulu Selangor Selangor, Malaysia	3.52314	101.633		Selangor											12.5.2020	15.5.2020	NEGATIF				NEGATIF
hs1433	hs1433	44	1977-05-03	Melayu	Female	Citizen	Raudatul Ulum Kg Ulu Rening 44300 Batang Kali Hulu Selangor, Hulu Selangor Selangor, Malaysia	3.47965	101.689		Selangor											12.5.2020	15.5.2020	NEGATIF				NEGATIF
hs1434	hs1434	30	1991-10-04	Melayu	Female	Citizen	Raudatul Ulum Kg Ulu Rening 44300 Batang Kali Hulu Selangor, Hulu Selangor Selangor, Malaysia	3.47965	101.689		Selangor											12.5.2020	15.5.2020	NEGATIF				NEGATIF
hs1435	hs1435	4	2017-07-09	Melayu	Female	Citizen	Raudatul Ulum Kg Ulu Rening 44300 Batang Kali Hulu Selangor, Hulu Selangor Selangor, Malaysia	3.47965	101.689		Selangor											12.5.2020	15.5.2020	NEGATIF				NEGATIF
hs1436	hs1436	30	1991-04-12	Melayu	Female	Citizen	Maahad Darul Atiq, Hulu Selangor Selangor, Malaysia, Hulu Selangor Selangor, Malaysia	3.52314	101.633		Selangor											12.5.2020	15.5.2020	NEGATIF				NEGATIF
hs1437	hs1437	10	26/5/2011	Melayu	Female	Citizen	Maahad Darul Atiq, Hulu Selangor Selangor, Malaysia, Hulu Selangor Selangor, Malaysia	3.52314	101.633		Selangor											12.5.2020	15.5.2020	NEGATIF				NEGATIF
hs1438	hs1438	87	1934-02-02	Melayu	Female	Citizen	Madrasah Darul Atiq Kg Melayu Rasa Batu 34 Â½ 44200 Hulu Selangor Selangor, Hulu Selangor Selangor, Malaysia	3.52314	101.633		Selangor											12.5.2020	15.5.2020	NEGATIF				NEGATIF
hs1439	hs1439	16	17/6/2005	Melayu	Female	Citizen	No 7 Jalan Kembojasari 10 Bandar Sungai Buaya ,, 48010 Hulu Selangor Selangor, Malaysia	3.3827	101.536		Selangor											6.5.2020	8.5.2020	NEGATIF				NEGATIF
hs144	hs144	8	29/4/2013	Melayu	Female	Citizen	C-G-16 Apt Dahlia, Taman Bunga Raya, Bukit Beruntung	3.43799	101.551		Selangor									DAERAH	28.3.2020	25.3.2020	2020-02-04	NEGATIF				NEGATIF
hs1440	hs1440	86	26/5/1935	Melayu	Female	Citizen	No 7 Jalan Kembojasari 10, Bandar Baru Sungai Buaya, - Hulu Selangor Selangor, Malaysia	3.3827	101.536		Selangor											13.5.2020	15.5.2020	NEGATIF				NEGATIF
hs1441	hs1441	32	17/12/1988	India	Female	Citizen	B-G-20 PANGSAPURI SERI KIAMBANG, JALAN TASIK TERATAI, TAMAN TASIK TERATAI, SERENDAH	3.40228	101.632		Selangor				NO		KELUARGA							NEGATIF	18.5.2020	19.5.2020	NEGATIF	NEGATIF
hs1442	hs1442	5	22/9/2016	India	Female	Citizen	B-G-20 PANGSAPURI SERI KIAMBANG, JALAN TASIK TERATAI, TAMAN TASIK TERATAI, SERENDAH	3.40228	101.632		Selangor				NO		KELUARGA							NEGATIF				NEGATIF
hs1443	hs1443	30	30/10/1991	India	Female	Citizen	No 5, Jln Damai 3, Tmn Damai Utama,	3.53824	101.656		Selangor				N0		KELUARGA							NEGATIF				NEGATIF
hs1444	hs1444	20	28/10/2001	Orang Asli	Male	Citizen	No 72 Kg Orang Asli Tun Abdul Razak Jalan Padang Golf 44000 Kkb	4	102		Selangor				NO		SEKERJA					18.5.2020	19.5.2020	NEGATIF	21.5.2020	23.5.2020	NEGATIF	NEGATIF
hs1445	hs1445	24	1997-04-08	Orang Asli	Male	Citizen	No. 30 Kg. Orang Asli Tun Razak 44000 Kkb	4	102		Selangor				NO		SEKERJA					18.5.2020	19.5.2020	NEGATIF	21.5.2020	23.5.2020	NEGATIF	NEGATIF
hs1446	hs1446	24	13/10/1997	Orang Asli	Male	Citizen	No. 63 Kg Orang Asli Tun Razak Kkb	3.56093	101.659		Selangor				NO		KAWAN					18.5.2020	19.5.2020	NEGATIF				NEGATIF
hs1447	hs1447	39	14/5/1982	Orang Asli	Male	Citizen	No. 17 Kg Orang Asli Tun Abdul Razak 44000 Kkb	3.57084	101.657		Selangor				NO		SEKERJA/ KAWAN							NEGATIF				NEGATIF
hs1448	hs1448	40	31/8/1981	Orang Asli	Female	Citizen	NO 72 Kg OA Tun Razak, KKB	3.56093	101.659		Selangor				NO		KELUARGA RAKAN							NEGATIF				NEGATIF
hs1449	hs1449	13	16/10/2008	Orang Asli	Male	Citizen	NO 72 Kg OA Tun Razak, KKB	3.56093	101.659		Selangor				NO		KELUARGA RAKAN							NEGATIF				NEGATIF
hs145	hs145	7	2013-11-12	Melayu	Male	Citizen	N-1-19 Apt Dahlia, Taman Bunga Raya, Bukit Beruntung	3.43799	101.551		Selangor									DAERAH	28.3.2020	25.3.2020	2020-02-04	NEGATIF				NEGATIF
hs1450	hs1450	10	2011-10-02	Orang Asli	Female	Citizen	No 72 Kg OA Tun Razak Kuala Kubu Bharu	4	102		Selangor				NO		KELUARGA RAKAN					21.5.2020	24.5.2020	NEGATIF				NEGATIF
hs1451	hs1451	35	19/2/1986	Orang Asli	Male	Citizen	NO 7 Kg OA Tun Razak, KKB				Selangor				NO		SEKERJA							NEGATIF				NEGATIF
hs1452	hs1452	42	20/4/1979	Orang Asli	Male	Citizen	NO 8a, Kg Orang Asli Tun Razak,				Selangor				NO		KELUARGA					21.5.2020	23.5.2020	NEGATIF				NEGATIF
hs1453	hs1453	41	17/1/1980	Orang Asli	Female	Citizen	NO 8a, Kg Orang Asli Tun Razak,				Selangor				NO		KELUARGA					21.5.2020	23.5.2020	NEGATIF				NEGATIF
hs1454	hs1454	18	19/2/2003	Orang Asli	Male	Citizen	NO 8a, Kg Orang Asli Tun Razak,				Selangor				NO		KELUARGA					21.5.2020	23.5.2020	NEGATIF				NEGATIF
hs1455	hs1455	16	30/3/2005	Orang Asli	Female	Citizen	NO 8a, Kg Orang Asli Tun Razak,				Selangor				NO		KELUARGA					21.5.2020	23.5.2020	NEGATIF				NEGATIF
hs1456	hs1456	8	2012-08-12	Orang Asli	Female	Citizen	NO 8a, Kg Orang Asli Tun Razak,				Selangor				NO		KELUARGA					21.5.2020	23.5.2020	NEGATIF				NEGATIF
hs1457	hs1457	4	19/12/2016	Orang Asli	Male	Citizen	NO 8a, Kg Orang Asli Tun Razak,				Selangor				NO		KELUARGA					21.5.2020	23.5.2020	NEGATIF				NEGATIF
hs1458	hs1458	38	1983-09-11	Orang Asli	Female	Citizen	No9, Kg Orang Asli Tun Razak,				Selangor				NO		SAUDARA					21.5.2020	23.5.2020	NEGATIF				NEGATIF
hs1459	hs1459	61	31/12/1959	Orang Asli	Female	Citizen	No9, Kg Orang Asli Tun Razak,				Selangor				NO		SAUDARA							NEGATIF				NEGATIF
hs146	hs146	8	2013-06-03	Melayu	Male	Citizen	D-1-11 Apt Buginvilla, Taman Bunga Raya, Bukit Beruntung	3.43891	101.547		Selangor									DAERAH	28.3.2020	25.3.2020	2020-02-04	NEGATIF				NEGATIF
hs1460	hs1460	17	25/11/2004	Orang Asli	Male	Citizen	No9, Kg Orang Asli Tun Razak,				Selangor				NO		SAUDARA					21.5.2020	23.5.2020	NEGATIF				NEGATIF
hs1461	hs1461	12	2009-12-10	Orang Asli	Female	Citizen	No9, Kg Orang Asli Tun Razak,				Selangor				NO		SAUDARA					21.5.2020	23.5.2020	NEGATIF				NEGATIF
hs1462	hs1462			Foreigner	Male	Non-citizen	No9, Kg Orang Asli Tun Razak,				Selangor				NO		SAUDARA							NEGATIF				NEGATIF
hs1463	hs1463	0	20/5/2021	Orang Asli	Female	Citizen	NO 9 Kg OA Tun Razak, KKB	3.56093	101.659		Selangor				NO		SAUDARA					21.5.2020	23.5.2020	NEGATIF				NEGATIF
hs1464	hs1464	19	16/7/2002	Orang Asli	Female	Citizen	No 45 Kg OA Tun Razak Kuala Kubu Bharu	3.57084	101.657		Selangor				NO		SAUDARA					21.5.2020	23.5.2020	NEGATIF				NEGATIF
hs1465	hs1465	31	13/11/1990	Orang Asli	Female	Citizen	NO 12, KAMPUNG ORANG ASLI SG. JANG, KERLING SELANGOR	3.21322	101.866		Selangor				NO		KELUARGA			SARINGAN ORANG ASLI SG JANG		22.5.2020	25.5.2020	NEGATIF				NEGATIF
hs1466	hs1466	8	17/1/2013	Orang Asli	Male	Citizen	NO 12, KAMPUNG ORANG ASLI SG. JANG, KERLING SELANGOR	3.21322	101.866		Selangor				NO		KELUARGA			SARINGAN ORANG ASLI SG JANG		22.5.2020	25.5.2020	NEGATIF				NEGATIF
hs1467	hs1467	4	26/10/2017	Orang Asli	Female	Citizen	NO 12, KAMPUNG ORANG ASLI SG. JANG, KERLING SELANGOR	3.21322	101.866		Selangor				NO		KELUARGA			SARINGAN ORANG ASLI SG JANG		22.5.2020	25.5.2020	NEGATIF				NEGATIF
hs1468	hs1468	15	16/4/2006	Orang Asli	Female	Citizen	NO 4, KAMPUNG ORANG ASLI SG. JANG, KERLING SELANGOR	3	102		Selangor				NO		SAUDARA			SARINGAN ORANG ASLI SG JANG		22.5.2020	24.5.2020	NEGATIF				NEGATIF
hs1469	hs1469	15	2006-09-06	Orang Asli	Male	Citizen	NO 3, KAMPUNG ORANG ASLI SG. JANG, KERLING SELANGOR	3	102		Selangor				NO		SAUDARA			SARINGAN ORANG ASLI SG JANG		22.5.2020	24.5.2020	NEGATIF				NEGATIF
hs147	hs147	8	18/5/2013	Melayu	Male	Citizen	No 5, Jalan Adenium 3A/2, Seksyen BB5, Bukit Beruntung	3.42451	101.565		Selangor									DAERAH	28.3.2020	25.3.2020	2020-02-04	NEGATIF				NEGATIF
hs1470	hs1470	13	29/3/2008	Orang Asli	Female	Citizen	NO 3, KAMPUNG ORANG ASLI SG. JANG, KERLING SELANGOR	3	102		Selangor				NO		SAUDARA			SARINGAN ORANG ASLI SG JANG		22.5.2020	24.5.2020	NEGATIF				NEGATIF
hs1471	hs1471	15	28/7/2006	Orang Asli	Female	Citizen	No8, Kg Orang Asli Sungai Jang, Kerling,	3.57843	101.635		Selangor				NO		SAUDARA			SARINGAN ORANG ASLI SG JANG		22.5.2020	24.5.2020	NEGATIF				NEGATIF
hs1472	hs1472	8	31/3/2013	Orang Asli	Male	Citizen	Kg Orang Asli Sungai Jang, Kerling,	3.57843	101.635		Selangor				NO		SAUDARA			SARINGAN ORANG ASLI SG JANG		22.5.2020	24.5.2020	NEGATIF				NEGATIF
hs1473	hs1473	15	2006-02-03	Orang Asli	Female	Citizen	Kg Orang Asli Sungai Jang, Kerling,	3.57843	101.635		Selangor				NO		SAUDARA			SARINGAN ORANG ASLI SG JANG		22.5.2020	25.5.2020	NEGATIF				NEGATIF
hs1474	hs1474	31	23/5/1990	Orang Asli	Male	Citizen	No14, Kg Orang Asli Sungai Jang, Kerling,	3.57843	101.635		Selangor				NO		SAUDARA			SARINGAN ORANG ASLI SG JANG		22.5.2020	24.5.2020	NEGATIF				NEGATIF
hs1475	hs1475	31	1990-04-09	Melayu	Female	Citizen	No 11, Jln Kemboja 4a/9 Bukit Sentosa	3.41567	101.593		Selangor				NO		KELUARGA					22.5.2020	23.5.2020	NEGATIF	25.5.2020	25.5.2020	NEGATIF	NEGATIF
hs1476	hs1476	22	24/6/1999	Melayu	Male	Citizen	Lot 1177, Jalan Besar Setia Jaya Kampung Kanchong Tengah, 42700 Banting Selangor.				Selangor		STUDENT	UPSI	NO									NEGATIF				NEGATIF
hs1477	hs1477	24	13/2/1997	Melayu	Male	Citizen	No 2, Jalan Pulai Jaya 3, Bandar Pulai Jaya, Simpang Pulai , 31300 Perak				Selangor		STUDENT	UPSI	NO									NEGATIF				NEGATIF
hs1478	hs1478	21	2000-04-05	Melayu	Male	Citizen	No 2-D, Jalan Laksamana 1, Taman Kota Laksamana, 75200, Melaka				Selangor		STUDENT	UPSI	NO									NEGATIF				NEGATIF
hs1479	hs1479	24	20/3/1997	Melayu	Male	Citizen	Lot 1489, lorong piala 12,taman sukma, Petra Jaya, Kuching, Sarawak				Selangor		STUDENT	UPSI	NO									NEGATIF				NEGATIF
hs148	hs148	8	25/11/2013	Melayu	Female	Citizen	J-2-15 Apt Cempaka, Jalan Bunga Raya 1, Taman Bunga Raya, Bukit Beruntung	3.43794	101.548		Selangor									DAERAH	28.3.2020	25.3.2020	2020-02-04	NEGATIF				NEGATIF
hs1480	hs1480	58	29/7/1963	Cina	Female	Citizen	Persatuan Bantuan Keluarga Negeri Selangor, Ulu Yam,	3.42496	101.66		Selangor				NO							20.5.2020	21.5.2020	NEGATIF				NEGATIF
hs1481	hs1481	36	27/7/1985	Cina	Female	Citizen	Persatuan Bantuan Keluarga Negeri Selangor, Ulu Yam,	3.42496	101.66		Selangor				NO							20.5.2020	21.5.2020	NEGATIF				NEGATIF
hs1482	hs1482	53	15/1/1968	Cina	Female	Citizen	Persatuan Bantuan Keluarga Negeri Selangor, Ulu Yam,	3	102		Selangor				NO							20.5.2020	21.5.2020	NEGATIF				NEGATIF
hs1483	hs1483	42	1979-06-12	India	Male	Citizen	Persatuan Bantuan Keluarga Negeri Selangor, Ulu Yam,	3	102		Selangor				NO							20.5.2020	21.5.2020	NEGATIF				NEGATIF
hs1484	hs1484	37	1984-09-06	Cina	Female	Citizen	Persatuan Bantuan Keluarga Negeri Selangor, Ulu Yam,	3	102		Selangor				NO							20.5.2020	21.5.2020	NEGATIF				NEGATIF
hs1485	hs1485	48	1973-01-01	Cina	Female	Citizen	Persatuan Bantuan Keluarga Negeri Selangor, Ulu Yam,	3	102		Selangor				NO							20.5.2020	21.5.2020	NEGATIF				NEGATIF
hs1486	hs1486	81	20/2/1940	Cina	Female	Citizen	Persatuan Bantuan Keluarga Negeri Selangor, Ulu Yam,	3	102		Selangor				NO							20.5.2020	21.5.2020	NEGATIF				NEGATIF
hs1487	hs1487	70	1951-05-10	Cina	Female	Citizen	Persatuan Bantuan Keluarga Negeri Selangor, Ulu Yam,	3	102		Selangor				NO							20.5.2020	21.5.2020	NEGATIF				NEGATIF
hs1488	hs1488	52	28/1/1969	Cina	Female	Citizen	Persatuan Bantuan Keluarga Negeri Selangor, Ulu Yam,	3.42496	101.66		Selangor				NO							20.5.2020	21.5.2020	NEGATIF				NEGATIF
hs1489	hs1489	62	15/5/1959	Cina	Female	Citizen	Persatuan Bantuan Keluarga Negeri Selangor, Ulu Yam,	3.42496	101.66		Selangor				NO							20.5.2020	21.5.2020	NEGATIF				NEGATIF
hs149	hs149	8	22/4/2013	Melayu	Female	Citizen	D-03-06 Apt Mawar, Taman Bunga Raya, Bukit Beruntung	3.43799	101.551		Selangor									DAERAH	28.3.2020	25.3.2020	2020-02-04	NEGATIF				NEGATIF
hs1490	hs1490	32	30/4/1989	Cina	Female	Citizen	Persatuan Bantuan Keluarga Negeri Selangor, Ulu Yam,	3.42496	101.66		Selangor				NO							20.5.2020	21.5.2020	NEGATIF				NEGATIF
hs1491	hs1491	26	29/10/1995	Cina	Female	Citizen	Persatuan Bantuan Keluarga Negeri Selangor, Ulu Yam,	3.42496	101.66		Selangor				NO							20.5.2020	21.5.2020	NEGATIF				NEGATIF
hs1492	hs1492	66	16/4/1955	Cina	Female	Citizen	Persatuan Bantuan Keluarga Negeri Selangor, Ulu Yam,	3.42496	101.66		Selangor				NO							20.5.2020	21.5.2020	NEGATIF				NEGATIF
hs1493	hs1493	68	1953-10-09	India	Female	Citizen	Persatuan Bantuan Keluarga Negeri Selangor, Ulu Yam,	3	102		Selangor				NO							20.5.2020	21.5.2020	NEGATIF				NEGATIF
hs1494	hs1494	40	22/7/1981	India	Male	Citizen	Persatuan Bantuan Keluarga Negeri Selangor, Ulu Yam,	3	102		Selangor				NO							20.5.2020	21.5.2020	NEGATIF				NEGATIF
hs1495	hs1495	69	1951-10-12	Cina	Female	Citizen	Persatuan Bantuan Keluarga Negeri Selangor, Ulu Yam,	3	102		Selangor				NO							20.5.2020	21.5.2020	NEGATIF				NEGATIF
hs1496	hs1496	69	1951-10-12	Cina	Male	Citizen	Persatuan Bantuan Keluarga Negeri Selangor, Ulu Yam,	3	102		Selangor				NO							20.5.2020	21.5.2020	NEGATIF				NEGATIF
hs1497	hs1497	56	30/1/1965	Cina	Female	Citizen	Persatuan Bantuan Keluarga Negeri Selangor, Ulu Yam,	3	102		Selangor				NO							20.5.2020	21.5.2020	NEGATIF				NEGATIF
hs1498	hs1498	81	1939-08-12	Cina	Female	Citizen	Persatuan Bantuan Keluarga Negeri Selangor, Ulu Yam,	3	102		Selangor				NO							20.5.2020	21.5.2020	NEGATIF				NEGATIF
hs1499	hs1499	78	1943-06-08	India	Female	Citizen	Persatuan Bantuan Keluarga Negeri Selangor, Ulu Yam,	3	102		Selangor				NO							20.5.2020	21.5.2020	NEGATIF				NEGATIF
hs15	hs15	27	17/7/1994	Melayu	Male	Citizen	B 14/2/5 Desa Pandan,Kg Pandan 55100 Kuala Lumpur	3.14464	101.734		Selangor									Seri Petaling Yakiniah	11.3.2020	2020-11-03		NEGATIF				NEGATIF
hs150	hs150	8	2013-10-06	Melayu	Female	Citizen	J-3-43 Apt Kenanga, Taman Bunga Raya, Bukit Beruntung	3.43873	101.546		Selangor									DAERAH	28.3.2020	25.3.2020	2020-02-04	NEGATIF				NEGATIF
hs1500	hs1500	51	1970-06-09	Cina	Female	Citizen	Persatuan Bantuan Keluarga Negeri Selangor, Ulu Yam,	3	102		Selangor				NO							20.5.2020	21.5.2020	NEGATIF				NEGATIF
hs1501	hs1501	66	20/6/1955	Cina	Male	Citizen	Persatuan Bantuan Keluarga Negeri Selangor, Ulu Yam,	3	102		Selangor				NO							20.5.2020	21.5.2020	NEGATIF				NEGATIF
hs1502	hs1502	61	29/7/1960	Cina	Male	Citizen	Persatuan Bantuan Keluarga Negeri Selangor, Ulu Yam,	3	102		Selangor				NO							20.5.2020	21.5.2020	NEGATIF				NEGATIF
hs1503	hs1503	56	22/5/1965	Cina	Male	Citizen	Persatuan Bantuan Keluarga Negeri Selangor, Ulu Yam,	3	102		Selangor				NO							20.5.2020	21.5.2020	NEGATIF				NEGATIF
hs1504	hs1504	80	1941-04-04	Cina	Male	Citizen	Persatuan Bantuan Keluarga Negeri Selangor, Ulu Yam,	3	102		Selangor				NO							20.5.2020	21.5.2020	NEGATIF				NEGATIF
hs1505	hs1505	62	29/10/1959	India	Male	Citizen	Persatuan Bantuan Keluarga Negeri Selangor, Ulu Yam,	3	102		Selangor				NO							20.5.2020	21.5.2020	NEGATIF				NEGATIF
hs1506	hs1506	70	13/9/1951	Cina	Female	Citizen	Persatuan Bantuan Keluarga Negeri Selangor, Ulu Yam,	3	102		Selangor				NO							20.5.2020	21.5.2020	NEGATIF				NEGATIF
hs1507	hs1507	71	25/9/1950	Cina	Male	Citizen	Persatuan Bantuan Keluarga Negeri Selangor, Ulu Yam,	3	102		Selangor				NO							20.5.2020	21.5.2020	NEGATIF				NEGATIF
hs1508	hs1508	56	1965-06-08	India	Male	Citizen	Persatuan Bantuan Keluarga Negeri Selangor, Ulu Yam,	3	102		Selangor				NO							20.5.2020	21.5.2020	NEGATIF				NEGATIF
hs1509	hs1509	52	1969-10-01	Cina	Male	Citizen	Persatuan Bantuan Keluarga Negeri Selangor, Ulu Yam,	3	102		Selangor				NO							20.5.2020	21.5.2020	NEGATIF				NEGATIF
hs151	hs151	8	2013-11-09	Melayu	Female	Citizen	C-1-13 Apt Mawar, Taman Bunga Raya, Bukit Beruntung	3.43799	101.551		Selangor									DAERAH	28.3.2020	25.3.2020	2020-02-04	NEGATIF				NEGATIF
hs1510	hs1510	30	15/11/1991	India	Female	Citizen	Persatuan Bantuan Keluarga Negeri Selangor, Ulu Yam,	3	102		Selangor				NO							20.5.2020	21.5.2020	NEGATIF				NEGATIF
hs1511	hs1511	1	20/5/2020	Cina	Female	Citizen	Persatuan Bantuan Keluarga Negeri Selangor, Ulu Yam,	3	102		Selangor				NO							20.5.2020	21.5.2020	NEGATIF				NEGATIF
hs1512	hs1512	63	18/6/1958	India	Male	Citizen	Persatuan Bantuan Keluarga Negeri Selangor, Ulu Yam,	3	102		Selangor				NO							20.5.2020	21.5.2020	NEGATIF				NEGATIF
hs1513	hs1513	54	1967-04-01	India	Male	Citizen	Persatuan Bantuan Keluarga Negeri Selangor, Ulu Yam,	3	102		Selangor				NO							20.5.2020	21.5.2020	NEGATIF				NEGATIF
hs1514	hs1514	33	25/3/1988	Cina	Male	Citizen	Persatuan Bantuan Keluarga Negeri Selangor, Ulu Yam,	3	102		Selangor				NO							20.5.2020	21.5.2020	NEGATIF				NEGATIF
hs1515	hs1515	68	1953-02-08	Cina	Male	Citizen	Persatuan Bantuan Keluarga Negeri Selangor, Ulu Yam,	3	102		Selangor				NO							20.5.2020	21.5.2020	NEGATIF				NEGATIF
hs1516	hs1516	56	1965-02-11	Cina	Male	Citizen	Persatuan Bantuan Keluarga Negeri Selangor, Ulu Yam,	3	102		Selangor				NO							20.5.2020	21.5.2020	NEGATIF				NEGATIF
hs1517	hs1517	46	1975-08-10	Cina	Male	Citizen	Persatuan Bantuan Keluarga Negeri Selangor, Ulu Yam,	3	102		Selangor				NO							20.5.2020	21.5.2020	NEGATIF				NEGATIF
hs1518	hs1518	95	17/7/2026	Cina	Female	Citizen	Persatuan Bantuan Keluarga Negeri Selangor, Ulu Yam,	3	102		Selangor				NO							20.5.2020	21.5.2020	NEGATIF				NEGATIF
hs1519	hs1519	34	1987-10-07	Cina	Male	Citizen	Persatuan Bantuan Keluarga Negeri Selangor, Ulu Yam,	3	102		Selangor				NO							20.5.2020	21.5.2020	NEGATIF				NEGATIF
hs152	hs152	8		Melayu	Male	Citizen	P-2-19 Apt Dahlia, Taman Bunga Raya, Bukit Beruntung	3.43071	101.562		Selangor									DAERAH	28.3.2020	25.3.2020	2020-02-04	NEGATIF				NEGATIF
hs1520	hs1520	27	23/4/1994	Melayu	Male	Citizen	Persatuan Bantuan Keluarga Negeri Selangor, Ulu Yam,	3	102		Selangor				NO							20.5.2020	21.5.2020	NEGATIF				NEGATIF
hs1521	hs1521	57	1964-04-08	Cina	Male	Citizen	Persatuan Bantuan Keluarga Negeri Selangor, Ulu Yam,	3	102		Selangor				NO							20.5.2020	21.5.2020	NEGATIF				NEGATIF
hs1522	hs1522	87	26/7/1934	Cina	Female	Citizen	Persatuan Bantuan Keluarga Negeri Selangor, Ulu Yam,	3	102		Selangor				NO							20.5.2020	21.5.2020	NEGATIF				NEGATIF
hs1523	hs1523	50	1971-02-04	India	Male	Citizen	Persatuan Bantuan Keluarga Negeri Selangor, Ulu Yam,	3	102		Selangor				NO							20.5.2020	21.5.2020	NEGATIF				NEGATIF
hs1524	hs1524	75	1946-06-07	India	Male	Citizen	Persatuan Bantuan Keluarga Negeri Selangor, Ulu Yam,	3	102		Selangor				NO							20.5.2020	21.5.2020	NEGATIF				NEGATIF
hs1525	hs1525	79	20/7/1942	Cina	Male	Citizen	Persatuan Bantuan Keluarga Negeri Selangor, Ulu Yam,	3	102		Selangor				NO							20.5.2020	21.5.2020	NEGATIF				NEGATIF
hs1526	hs1526	76	1945-06-12	Cina	Male	Citizen	Persatuan Bantuan Keluarga Negeri Selangor, Ulu Yam,	3	102		Selangor				NO							20.5.2020	21.5.2020	NEGATIF				NEGATIF
hs1527	hs1527	46	1975-10-09	Cina	Male	Citizen	Persatuan Bantuan Keluarga Negeri Selangor, Ulu Yam,	3	102		Selangor				NO							20.5.2020	21.5.2020	NEGATIF				NEGATIF
hs1528	hs1528	26	22/5/1995	Cina	Male	Citizen	Persatuan Bantuan Keluarga Negeri Selangor, Ulu Yam,	3	102		Selangor				NO							20.5.2020	21.5.2020	NEGATIF				NEGATIF
hs1529	hs1529	52	1969-11-09	Cina	Male	Citizen	Persatuan Bantuan Keluarga Negeri Selangor, Ulu Yam,	3	102		Selangor				NO							20.5.2020	21.5.2020	NEGATIF				NEGATIF
hs153	hs153	7	18/12/2013	Melayu	Male	Citizen	N-1-7 Apt Kenanga, Taman Bunga Raya, Bukit Beruntung	3.43799	101.551		Selangor									DAERAH	28.3.2020	25.3.2020	2020-02-04	NEGATIF				NEGATIF
hs1530	hs1530	85	22/2/1936	Cina	Male	Citizen	Persatuan Bantuan Keluarga Negeri Selangor, Ulu Yam,	3	102		Selangor				NO							20.5.2020	21.5.2020	NEGATIF				NEGATIF
hs1531	hs1531	28	22/10/1993	Cina	Male	Citizen	Persatuan Bantuan Keluarga Negeri Selangor, Ulu Yam,	3	102		Selangor				NO							20.5.2020	21.5.2020	NEGATIF				NEGATIF
hs1532	hs1532	52	13/2/1969	Cina	Male	Citizen	Persatuan Bantuan Keluarga Negeri Selangor, Ulu Yam,	3	102		Selangor				NO							20.5.2020	21.5.2020	NEGATIF				NEGATIF
hs1533	hs1533	61	1960-06-04	Cina	Male	Citizen	Persatuan Bantuan Keluarga Negeri Selangor, Ulu Yam,	3	102		Selangor				NO							20.5.2020	21.5.2020	NEGATIF				NEGATIF
hs1534	hs1534	49	26/8/1972	India	Male	Citizen	Persatuan Bantuan Keluarga Negeri Selangor, Ulu Yam,	3	102		Selangor				NO							20.5.2020	21.5.2020	NEGATIF				NEGATIF
hs1535	hs1535			Foreigner	Male	Non-citizen	Persatuan Bantuan Keluarga Negeri Selangor, Ulu Yam,	3.42496	101.66		Selangor				NO							20.5.2020	21.5.2020	NEGATIF				NEGATIF
hs1536	hs1536	56	28/8/1965	India	Male	Citizen	Persatuan Bantuan Keluarga Negeri Selangor, Ulu Yam,	3	102		Selangor				NO							20.5.2020	21.5.2020	NEGATIF				NEGATIF
hs1537	hs1537	79	1942-06-07	Cina	Male	Citizen	Persatuan Bantuan Keluarga Negeri Selangor, Ulu Yam,	3	102		Selangor				NO							20.5.2020	21.5.2020	NEGATIF				NEGATIF
hs1538	hs1538	76	17/12/1944	Cina	Male	Citizen	Persatuan Bantuan Keluarga Negeri Selangor, Ulu Yam,	3	102		Selangor				NO							20.5.2020	21.5.2020	NEGATIF				NEGATIF
hs1539	hs1539	39	66/05/82	India	Male	Citizen	Persatuan Bantuan Keluarga Negeri Selangor, Ulu Yam,	3	102		Selangor				NO							20.5.2020	21.5.2020	NEGATIF				NEGATIF
hs154	hs154	8	2013-01-11	Melayu	Female	Citizen	No 25, Jalan semarak 1C, Seksyen BB7, Bandar Bukit Beruntung	3.41749	101.565		Selangor									DAERAH	28.3.2020	25.3.2020	2020-02-04	NEGATIF				NEGATIF
hs1540	hs1540	35	79/73/80	Foreigner	Male	Non-citizen	Persatuan Bantuan Keluarga Negeri Selangor, Ulu Yam,	3	102		Selangor				NO							20.5.2020	21.5.2020	NEGATIF				NEGATIF
hs1541	hs1541	80	27/1/1941	Cina	Male	Citizen	Persatuan Bantuan Keluarga Negeri Selangor, Ulu Yam,	3	102		Selangor				NO							20.5.2020	21.5.2020	NEGATIF				NEGATIF
hs1542	hs1542		20/5/2020	India	Male	Citizen	Persatuan Bantuan Keluarga Negeri Selangor, Ulu Yam,	3.42496	101.66		Selangor				NO							20.5.2020	21.5.2020	NEGATIF				NEGATIF
hs1543	hs1543		20/5/2020	Foreigner	Male	Non-citizen	Persatuan Bantuan Keluarga Negeri Selangor, Ulu Yam,	3.42496	101.66		Selangor				NO							20.5.2020	21.5.2020	NEGATIF				NEGATIF
hs1544	hs1544	45	37/62/71	India	Male	Citizen	Persatuan Bantuan Keluarga Negeri Selangor, Ulu Yam,	3.42496	101.66		Selangor				NO							20.5.2020	21.5.2020	NEGATIF				NEGATIF
hs1545	hs1545		20/5/2020	India	Male	Citizen	Persatuan Bantuan Keluarga Negeri Selangor, Ulu Yam,	3.42496	101.66		Selangor				NO							20.5.2020	21.5.2020	NEGATIF				NEGATIF
hs1546	hs1546		20/5/2020	Foreigner	Male	Non-citizen	Persatuan Bantuan Keluarga Negeri Selangor, Ulu Yam,	3.42496	101.66		Selangor				NO							20.5.2020	21.5.2020	NEGATIF				NEGATIF
hs1547	hs1547		20/5/2020	India	Male	Citizen	Persatuan Bantuan Keluarga Negeri Selangor, Ulu Yam,	3.42496	101.66		Selangor				NO							20.5.2020	21.5.2020	NEGATIF				NEGATIF
hs1548	hs1548		20/5/2020	India	Female	Citizen	Persatuan Bantuan Keluarga Negeri Selangor, Ulu Yam,	3.42496	101.66		Selangor				NO							20.5.2020	21.5.2020	NEGATIF				NEGATIF
hs1549	hs1549	43	23/2/1978	Melayu	Female	Citizen	Persatuan Bantuan Keluarga Negeri Selangor, Ulu Yam,	3.42496	101.66		Selangor				NO							20.5.2020	21.5.2020	NEGATIF				NEGATIF
hs155	hs155	8	18/1/2013	Melayu	Female	Citizen	A-1-19, Apt Kenanga, Taman Bunga Raya, Bukit Beruntung	3.43799	101.551		Selangor									DAERAH	28.3.2020	25.3.2020	2020-02-04	NEGATIF				NEGATIF
hs1550	hs1550	69	38/71/46	Foreigner	Female	Non-citizen	Persatuan Bantuan Keluarga Negeri Selangor, Ulu Yam,	3.42496	101.66		Selangor				NO							20.5.2020	21.5.2020	NEGATIF				NEGATIF
hs1551	hs1551	70	1951-03-07	Cina	Female	Citizen	Persatuan Bantuan Keluarga Negeri Selangor, Ulu Yam,	3.42496	101.66		Selangor				NO							20.5.2020	21.5.2020	NEGATIF				NEGATIF
hs1552	hs1552	17	16/3/2004	Cina	Female	Citizen	Persatuan Bantuan Keluarga Negeri Selangor, Ulu Yam,	3.42496	101.66		Selangor				NO							20.5.2020	21.5.2020	NEGATIF				NEGATIF
hs1553	hs1553	1	20/5/2020	Cina	Male	Citizen	Persatuan Bantuan Keluarga Negeri Selangor, Ulu Yam,	3.42496	101.66		Selangor				NO							20.5.2020	21.5.2020	NEGATIF				NEGATIF
hs1554	hs1554	1	20/5/2020	Cina	Female	Citizen	Persatuan Bantuan Keluarga Negeri Selangor, Ulu Yam,	3.42496	101.66		Selangor				NO							20.5.2020	21.5.2020	NEGATIF				NEGATIF
hs1555	hs1555			Foreigner	Female	Non-citizen	Persatuan Bantuan Keluarga Negeri Selangor, Ulu Yam,	3.42496	101.66		Selangor				NO							20.5.2020	21.5.2020	NEGATIF				NEGATIF
hs1556	hs1556			Foreigner	Female	Non-citizen	Persatuan Bantuan Keluarga Negeri Selangor, Ulu Yam,	3.42496	101.66		Selangor				NO							20.5.2020	21.5.2020	NEGATIF				NEGATIF
hs1557	hs1557	77	20/12/1943	India	Male	Citizen	Persatuan Bantuan Keluarga Negeri Selangor, Ulu Yam,	3.42496	101.66		Selangor				NO							20.5.2020	21.5.2020	NEGATIF				NEGATIF
hs1558	hs1558	81	1940-01-11	Cina	Male	Citizen	Persatuan Bantuan Keluarga Negeri Selangor, Ulu Yam,	3.42496	101.66		Selangor				NO							20.5.2020	21.5.2020	NEGATIF				NEGATIF
hs1559	hs1559	1	20/5/2020	Foreigner	Male	Non-citizen	Persatuan Bantuan Keluarga Negeri Selangor, Ulu Yam,	3.42496	101.66		Selangor				NO							20.5.2020	21.5.2020	NEGATIF				NEGATIF
hs156	hs156	9	19/1/2012	Melayu	Female	Citizen	N-1-23, Apt Dahlia, Taman Bunga Raya, Bukit Beruntung	3.43799	101.551		Selangor									DAERAH	28.3.2020	25.3.2020	2020-02-04	NEGATIF				NEGATIF
hs1560	hs1560	61	23/4/1960	India	Female	Citizen	Persatuan Bantuan Keluarga Negeri Selangor, Ulu Yam,	3.42496	101.66		Selangor				NO							20.5.2020	21.5.2020	NEGATIF				NEGATIF
hs1561	hs1561	44	1977-04-10	Cina	Female	Citizen	Persatuan Bantuan Keluarga Negeri Selangor, Ulu Yam,	3.42496	101.66		Selangor				NO							20.5.2020	21.5.2020	NEGATIF				NEGATIF
hs1562	hs1562	50	1971-08-10	India	Female	Citizen	Persatuan Bantuan Keluarga Negeri Selangor, Ulu Yam,	3.42496	101.66		Selangor				NO							20.5.2020	21.5.2020	NEGATIF				NEGATIF
hs1563	hs1563	78	20/5/1943	Cina	Female	Citizen	Persatuan Bantuan Keluarga Negeri Selangor, Ulu Yam,	3.42496	101.66		Selangor				NO							20.5.2020	21.5.2020	NEGATIF				NEGATIF
hs1564	hs1564			Cina	Female	Citizen	Persatuan Bantuan Keluarga Negeri Selangor, Ulu Yam,	3.42496	101.66		Selangor				NO							20.5.2020	21.5.2020	NEGATIF				NEGATIF
hs1565	hs1565	75	17/12/1945	Cina	Female	Citizen	Persatuan Bantuan Keluarga Negeri Selangor, Ulu Yam,	3.42496	101.66		Selangor				NO							20.5.2020	21.5.2020	NEGATIF				NEGATIF
hs1566	hs1566	1	20/5/2020	Cina	Male	Citizen	Persatuan Bantuan Keluarga Negeri Selangor, Ulu Yam,	3.42496	101.66		Selangor				NO							20.5.2020	21.5.2020	NEGATIF				NEGATIF
hs1567	hs1567	71	25/9/1950	Cina	Male	Citizen	Persatuan Bantuan Keluarga Negeri Selangor, Ulu Yam,	3.42496	101.66		Selangor				NO							20.5.2020	21.5.2020	NEGATIF				NEGATIF
hs1568	hs1568	39	66/05/82	India	Male	Citizen	Persatuan Bantuan Keluarga Negeri Selangor, Ulu Yam,	3.42496	101.66		Selangor				NO							20.5.2020	21.5.2020	NEGATIF				NEGATIF
hs1569	hs1569	33	13/8/1988	India	Female	Citizen	Persatuan Bantuan Keluarga Negeri Selangor, Ulu Yam,	3.42496	101.66		Selangor				NO							20.5.2020	21.5.2020	NEGATIF				NEGATIF
hs157	hs157	10	24/6/2011	Melayu	Male	Citizen	C-13-2 Apt Buginvilla, Taman Bunga Raya, Bukit Beruntung	3.43891	101.547		Selangor									DAERAH	28.3.2020	25.3.2020	2020-02-04	NEGATIF				NEGATIF
hs1570	hs1570			India	Female	Citizen					Selangor		tukang masak		NO							20.5.2020	21.5.2020	NEGATIF				NEGATIF
hs1571	hs1571	53	24/3/1968	India	Male	Citizen	no.11 jln mahagoni 5a batang kali	3	102		Selangor		pemandu		NO							20.5.2020	21.5.2020	NEGATIF				NEGATIF
hs1572	hs1572			India	Female	Citizen					Selangor		kerani		NO							20.5.2020	21.5.2020	NEGATIF				NEGATIF
hs1573	hs1573	55	26/6/1966	India	Female	Citizen	Persatuan Bantuan Keluarga Negeri Selangor, Ulu Yam,	3	102		Selangor				NO							20.5.2020	21.5.2020	NEGATIF				NEGATIF
hs1574	hs1574	66	1955-02-11	Cina	Female	Citizen	Persatuan Bantuan Keluarga Negeri Selangor, Ulu Yam,	3	102		Selangor				NO							20.5.2020	21.5.2020	NEGATIF				NEGATIF
hs1575	hs1575	9	23/10/2012	Melayu	Male	Citizen	No 17 Kg OA Tun Razak Kuala Kubu Bharu	3.57084	101.657		Selangor						SERUMAH					21.5.2020	24.5.2020	NEGATIF				NEGATIF
hs1576	hs1576	13	16/10/2008	Melayu	Male	Citizen	No 17 Kg OA Tun Razak Kuala Kubu Bharu	3.57084	101.657		Selangor						SERUMAH					21.5.2020	24.5.2020	NEGATIF				NEGATIF
hs1577	hs1577	40	31/8/1981	Melayu	Female	Citizen	No 17 Kg OA Tun Razak Kuala Kubu Bharu	3.57084	101.657		Selangor						SERUMAH					21.5.2020	24.5.2020	NEGATIF				NEGATIF
hs1578	hs1578	19	14/5/2002	Melayu	Male	Citizen	No 17 Kg OA Tun Razak Kuala Kubu Bharu	3.57084	101.657		Selangor						SERUMAH					21.5.2020	24.5.2020	NEGATIF				NEGATIF
hs1579	hs1579	16	13/9/2005	Melayu	Male	Citizen	No 45 Kg OA Tun Razak Kuala Kubu Bharu	3.57084	101.657		Selangor						KELUARGA					21.5.2020	23.5.2020	NEGATIF				NEGATIF
hs158	hs158	10	2011-03-05	Melayu	Male	Citizen	C-3-31 Apt Kenanga Bunga Raya				Selangor									DAERAH	1.4.2020	25.3.2020	2020-02-04	NEGATIF				NEGATIF
hs1580	hs1580	34	26/11/1987	Orang Asli	Female	Citizen	No45, Kg Orang Asli Tun Razak,				Selangor						KELUARGA					21.5.2020	23.5.2020	NEGATIF				NEGATIF
hs1581	hs1581	38	1983-12-10	Orang Asli	Male	Citizen	No45, Kg Orang Asli Tun Razak,				Selangor						KELUARGA					21.5.2020	23.5.2020	NEGATIF				NEGATIF
hs1582	hs1582	52	13/9/1969	Orang Asli	Female	Citizen	No45, Kg Orang Asli Tun Razak,				Selangor						KELUARGA					21.5.2020	23.5.2020	NEGATIF				NEGATIF
hs1583	hs1583	65	22/8/1956	Orang Asli	Male	Citizen	No45, Kg Orang Asli Tun Razak,				Selangor						KELUARGA					21.5.2020	23.5.2020	NEGATIF				NEGATIF
hs1584	hs1584	41	15/5/1980	Orang Asli	Female	Citizen	No 18 Kg OA Tun Razak Kuala Kubu Bharu	3.57084	101.657		Selangor						KELUARGA					21.5.2020	23.5.2020	NEGATIF				NEGATIF
hs1585	hs1585	32	1989-02-06	Orang Asli	Female	Citizen	No 18 Kg OA Tun Razak Kuala Kubu Bharu	3.57084	101.657		Selangor						KELUARGA					21.5.2020	23.5.2020	NEGATIF				NEGATIF
hs1586	hs1586	18	2003-01-09	Orang Asli	Female	Citizen	No 18 Kg OA Tun Razak Kuala Kubu Bharu	3.57084	101.657		Selangor						KELUARGA					21.5.2020	23.5.2020	NEGATIF				NEGATIF
hs1587	hs1587	43	23/9/1978	Orang Asli	Male	Citizen	No 18 Kg OA Tun Razak Kuala Kubu Bharu	3.57084	101.657		Selangor						KELUARGA					21.5.2020	23.5.2020	NEGATIF				NEGATIF
hs1588	hs1588	13	13/4/2008	Orang Asli	Male	Citizen	No 18 Kg OA Tun Razak Kuala Kubu Bharu	3.57084	101.657		Selangor						KELUARGA					21.5.2020	24.5.2020	NEGATIF				NEGATIF
hs1589	hs1589	12	2009-06-11	Orang Asli	Male	Citizen	No 18 Kg OA Tun Razak Kuala Kubu Bharu	3.57084	101.657		Selangor						KELUARGA					21.5.2020	24.5.2020	NEGATIF				NEGATIF
hs159	hs159	8	23/8/2013	Melayu	Male	Citizen	L-4-2 APARTMENT TERATAI, TBR				Selangor									DAERAH	1.4.2020	25.3.2020	2020-02-04	NEGATIF				NEGATIF
hs1590	hs1590	3	24/5/2018	Orang Asli	Female	Citizen	No 18 Kg OA Tun Razak Kuala Kubu Bharu	3.57084	101.657		Selangor						KELUARGA					21.5.2020	24.5.2020	NEGATIF				NEGATIF
hs1591	hs1591	6	15/12/2014	Orang Asli	Female	Citizen	No 18 Kg OA Tun Razak Kuala Kubu Bharu	3.57084	101.657		Selangor						KELUARGA					21.5.2020	24.5.2020	NEGATIF				NEGATIF
hs1592	hs1592	34	28/11/1987	Orang Asli	Female	Citizen	No 18 Kg OA Tun Razak Kuala Kubu Bharu	3.57084	101.657		Selangor						KELUARGA					21.5.2020	24.5.2020	NEGATIF				NEGATIF
hs1593	hs1593	33	1988-04-03	Orang Asli	Male	Citizen	No 18 Kg OA Tun Razak Kuala Kubu Bharu	3.57084	101.657		Selangor						KELUARGA					21.5.2020	23.5.2020	NEGATIF				NEGATIF
hs1594	hs1594	11	2010-09-07	Orang Asli	Male	Citizen	No18, Kg Orang Asli Tun Razak,				Selangor						KELUARGA					21.5.2020	23.5.2020	NEGATIF				NEGATIF
hs1595	hs1595	4	16/7/2017	Orang Asli	Male	Citizen	No18, Kg Orang Asli Tun Razak,				Selangor						KELUARGA					21.5.2020	23.5.2020	NEGATIF				NEGATIF
hs1596	hs1596	8	19/7/2013	Orang Asli	Female	Citizen	No18, Kg Orang Asli Tun Razak,				Selangor						KELUARGA					21.5.2020	23.5.2020	NEGATIF				NEGATIF
hs1597	hs1597	14	28/10/2007	Orang Asli	Female	Citizen	No18, Kg Orang Asli Tun Razak,				Selangor						KELUARGA					21.5.2020	23.5.2020	NEGATIF				NEGATIF
hs1598	hs1598	36	30/7/1985	Orang Asli	Female	Citizen	No 32 Kg OA Tun Razak Kuala Kubu Bharu	3.57084	101.657		Selangor						KELUARGA					21.5.2020	23.5.2020	NEGATIF				NEGATIF
hs1599	hs1599	12	27/3/2009	Orang Asli	Female	Citizen	No 32 Kg OA Tun Razak Kuala Kubu Bharu	3.57084	101.657		Selangor						KELUARGA					21.5.2020	23.5.2020	NEGATIF				NEGATIF
hs16	hs16	51	1970-01-12	Melayu	Male	Citizen	Blok F02-01-2a, Jalan Pjs 2/1, Taman Medan Jaya, 46000 Pj, Selangor	3.08219	101.635		Selangor									Seri Petaling Yakiniah	14.3.2020	14/3/2020		NEGATIF				NEGATIF
hs160	hs160	51	24/8/1970	Melayu	Male	Citizen	NO. 23, JALAN BAKAWALI 2B/2, SEKSYEN BS10, BUKIT SENTOSA 3				Selangor									DAERAH	1.4.2020	25.3.2020	2020-02-04	NEGATIF				NEGATIF
hs1600	hs1600	3	21/6/2018	Orang Asli	Female	Citizen	No 32 Kg OA Tun Razak Kuala Kubu Bharu	3.57084	101.657		Selangor						KELUARGA					21.5.2020	23.5.2020	NEGATIF				NEGATIF
hs1601	hs1601	17	2004-02-08	Orang Asli	Male	Citizen	No32, Kg Orang Asli Tun Razak,				Selangor						KELUARGA					21.5.2020	23.5.2020	NEGATIF				NEGATIF
hs1602	hs1602	23	14/10/1998	Orang Asli	Male	Citizen	No 32 Kg OA Tun Razak Kuala Kubu Bharu	3.57084	101.657		Selangor						KELUARGA					21.5.2020	23.5.2020	NEGATIF				NEGATIF
hs1603	hs1603	11	23/2/2010	Orang Asli	Female	Citizen	36, Kg Orang Asli Tun Razak,				Selangor						KELUARGA					21.5.2020	23.5.2020	NEGATIF				NEGATIF
hs1604	hs1604	17	2004-02-08	Orang Asli	Female	Citizen	36, Kg Orang Asli Tun Razak,				Selangor						KELUARGA					21.5.2020	23.5.2020	NEGATIF				NEGATIF
hs1605	hs1605	14	24/9/2007	Orang Asli	Female	Citizen	36, Kg Orang Asli Tun Razak,				Selangor						KELUARGA					21.5.2020	23.5.2020	NEGATIF				NEGATIF
hs1606	hs1606	37	26/2/1984	Orang Asli	Female	Citizen	36, Kg Orang Asli Tun Razak,				Selangor						KELUARGA					21.5.2020	23.5.2020	NEGATIF				NEGATIF
hs1607	hs1607	63	31/10/1958	Orang Asli	Male	Citizen	36, Kg Orang Asli Tun Razak,				Selangor						KELUARGA					21.5.2020	23.5.2020	NEGATIF				NEGATIF
hs1608	hs1608	33	15/12/1987	Orang Asli	Female	Citizen	No36, Kg Orang Asli Tun Razak,				Selangor						KELUARGA					21.5.2020	23.5.2020	NEGATIF				NEGATIF
hs1609	hs1609	12	16/11/2009	Orang Asli	Male	Citizen	No36, Kg Orang Asli Tun Razak,				Selangor						KELUARGA					21.5.2020	23.5.2020	NEGATIF				NEGATIF
hs161	hs161	39	25/4/1982	Melayu	Female	Citizen	No 62 JALAN MERANTI 6A,FASA 3 BANDAR BRU BTG KALI	3.45679	101.655		Selangor									DAERAH	1.4.2020	25.3.2020	2020-02-04	NEGATIF				NEGATIF
hs1610	hs1610	10	17/2/2011	Orang Asli	Male	Citizen	No36, Kg Orang Asli Tun Razak,				Selangor						KELUARGA					21.5.2020	23.5.2020	NEGATIF				NEGATIF
hs1611	hs1611	33	15/8/1988	Orang Asli	Male	Citizen	No36, Kg Orang Asli Tun Razak,				Selangor						KELUARGA					21.5.2020	23.5.2020	NEGATIF				NEGATIF
hs1612	hs1612	26	1995-10-08	Orang Asli	Male	Citizen	No36, Kg Orang Asli Tun Razak,				Selangor						KELUARGA					21.5.2020	23.5.2020	NEGATIF				NEGATIF
hs1613	hs1613	61	1960-10-08	Orang Asli	Female	Citizen	No36, Kg Orang Asli Tun Razak,				Selangor						KELUARGA					21.5.2020	23.5.2020	NEGATIF				NEGATIF
hs162	hs162	54	14/9/1967	Melayu	Female	Citizen	D-4-36, Apt Kenanga, TBR				Selangor									DAERAH	1.4.2020	25.3.2020	2020-02-04	NEGATIF				NEGATIF
hs163	hs163	45	27/11/1976	Melayu	Male	Citizen	No. 57, Jln Kemboja 4B/2 B.S 3	3.41383	101.598		Selangor									DAERAH	1.4.2020	25.3.2020	2020-02-04	NEGATIF				NEGATIF
hs164	hs164	41	21/8/1980	Melayu	Female	Citizen	22, JALAN INAI 4, PERUMAHAN JALAN INAI, SEKSYEN BB3	3.43043	101.559		Selangor									DAERAH	1.4.2020	25.3.2020	2020-02-04	NEGATIF				NEGATIF
hs165	hs165	54	26/5/1967	Melayu	Female	Citizen	NO. 6 JALAN KEMBOJA 4C/11, SEKSYEN BS8, BUKIT SENTOSA 3	3.4103	101.593		Selangor									DAERAH	1.4.2020	25.3.2020	2020-02-04	NEGATIF				NEGATIF
hs166	hs166	53	1968-09-10	Melayu	Male	Citizen	29 JALAN TELIPOT 3A/3, PERUMAHAN TELIPOT, BUKIT SENTOSA	3.40412	101.601		Selangor									DAERAH	1.4.2020	25.3.2020	2020-02-04	NEGATIF				NEGATIF
hs167	hs167	42	1979-03-07	Melayu	Male	Citizen	D-G-7, Apt Mawar, TBR				Selangor									DAERAH	1.4.2020	25.3.2020	2020-02-04	NEGATIF				NEGATIF
hs168	hs168	43	1978-01-12	Melayu	Female	Citizen	Blok E-3-05 Apt. Kemuning, TBR	3.44477	101.553		Selangor									DAERAH	1.4.2020	25.3.2020	2020-02-04	NEGATIF				NEGATIF
hs169	hs169	30	28/12/1990	Melayu	Female	Citizen	NO 11A, JALAN KEMBOJSARI 10, BNDAR SUNGAI BUAYA, 48010 RAWANG	3.38272	101.536		Selangor									DAERAH	1.4.2020	25.3.2020	2020-02-04	NEGATIF				NEGATIF
hs17	hs17	26	1995-08-08	Melayu	Male	Citizen	No 23, Lorong Au 4/17b, Taman Seri Keramat Tengah, 54200 Kl	3.19534	101.757		Selangor									Seri Petaling Yakiniah	10.3.2020	3.3.2020	7.4.2020	NEGATIF	27.3.2020	31.3.2020	NEGATIF	NEGATIF
hs170	hs170	10	13/1/2011	Melayu	Female	Citizen	F-3-23 Apt Anggerik Jalan Bunga Raya 2, TBR Bukit Beruntung	3.44619	101.548		Selangor									DAERAH	7.4.2020	6.4.2020	8.4.2020	NEGATIF				NEGATIF
hs171	hs171			Melayu	Female	Citizen	no.35 jln semarak 3A/3, BB7, b.b / kenduri kawen di 542 kg beta hilir k.b	3.41482	101.565		Selangor													NEGATIF				NEGATIF
hs172	hs172	32	15/2/1989	Melayu	Male	Citizen	BR-02, Kg. Kemahang, 27310 Benta, Pahang	4.0153	102.022		Selangor						KELUARGA					22.02.2020		NEGATIF				NEGATIF
hs173	hs173	53	21/1/1968	Melayu	Male	Citizen	BR-02, Kg. Kemahang, 27310 Benta, Pahang	4.0153	102.022		Selangor						KELUARGA					22.02.2020		NEGATIF				NEGATIF
hs174	hs174	39	16/11/1982	Melayu	Male	Citizen	BR-02, Kg. Kemahang, 27310 Benta, Pahang	4.0153	102.022		Selangor						KELUARGA					22.02.2020		NEGATIF				NEGATIF
hs175	hs175	76	31/12/1944	Melayu	Female	Citizen	BR-02, Kg. Kemahang, 27310 Benta, Pahang	4.0153	102.022		Selangor						KELUARGA					22.02.2020		NEGATIF				NEGATIF
hs176	hs176	77	20/12/1943	Melayu	Male	Citizen	BR-02, Kg. Kemahang, 27310 Benta, Pahang	4.0153	102.022		Selangor						KELUARGA					22.02.2020		NEGATIF				NEGATIF
hs177	hs177	46	17/4/1975	Melayu	Male	Citizen	BR-02, Kg. Kemahang, 27310 Benta, Pahang	4.0153	102.022		Selangor						KELUARGA					22.02.2020		NEGATIF				NEGATIF
hs178	hs178	39	30/7/1982	Melayu	Female	Citizen	BR-02, Kg. Kemahang, 27310 Benta, Pahang	4.0153	102.022		Selangor						KELUARGA					22.02.2020		NEGATIF				NEGATIF
hs179	hs179	15	16/8/2006	Melayu	Female	Citizen	BR-02, Kg. Kemahang, 27310 Benta, Pahang	4.0153	102.022		Selangor						KELUARGA					22.02.2020		NEGATIF				NEGATIF
hs18	hs18	46	18/1/1975	Melayu	Male	Citizen	No.27 Jalan Cengal 7, Desa Alam Ria,Batang Kali	3.46928	101.66		Selangor									Seri Petaling Yakiniah	10.03.2020	3.4.2020	7.4.2020	NEGATIF	27.3.2020	31.3.2020	NEGATIF	NEGATIF
hs180	hs180	13	18/11/2008	Melayu	Female	Citizen	BR-02, Kg. Kemahang, 27310 Benta, Pahang	4.0153	102.022		Selangor						KELUARGA					22.02.2020		NEGATIF				NEGATIF
hs181	hs181	5	2016-05-06	Melayu	Male	Citizen	BR-02, Kg. Kemahang, 27310 Benta, Pahang	4.0153	102.022		Selangor						KELUARGA					22.02.2020		NEGATIF				NEGATIF
hs182	hs182	62	1959-04-08	Melayu	Female	Citizen	lot 542, kg beta hilir, kb/ kenduri kawen di 542 kg beta hilir k.b				Selangor						KELUARGA							NEGATIF				NEGATIF
hs183	hs183	50	1971-03-03	Melayu	Male	Citizen	No 55 Jln Jenjarum 6 Bukit Sentosa	3.40983	101.562		Selangor						SURAU							NEGATIF				NEGATIF
hs184	hs184	38	1983-11-05	Melayu	Male	Citizen	No 22 Jln Semarak 2C Sekseyn BB 7	3.41612	101.566		Selangor						SURAU							NEGATIF				NEGATIF
hs185	hs185	85	1936-06-05	Melayu	Male	Citizen	No 55 Jln Jenjarum 6 Bukit Sentosa	3.40983	101.562		Selangor						SURAU							NEGATIF				NEGATIF
hs186	hs186	59	25/7/1962	Melayu	Male	Citizen	No 3 Jln Cempaka C 1/3 Bukit Beruntung	3.40311	101.563		Selangor						SURAU							NEGATIF				NEGATIF
hs187	hs187	60	00/05/61	Melayu	Male	Citizen	No 3 Jalan Anggerik 2F Prima Beruntung	3.40576	101.541		Selangor						SURAU							NEGATIF				NEGATIF
hs188	hs188	50	1971-03-03	Melayu	Male	Citizen	No 3 Jln Anggerik	3.4197	101.586		Selangor						SURAU							NEGATIF				NEGATIF
hs189	hs189	28	22/6/1993	Melayu	Male	Citizen	No 65 Jln Tulip 2 Bukit Sentosa	3.39713	101.564		Selangor						SURAU							NEGATIF				NEGATIF
hs19	hs19	45	1976-10-03	India	Female	Citizen	Hospital Kuala Kubu Baru	3.56435	101.653		Selangor									DAERAH	10.3.2020	15/3/2020	17/3/2020	NEGATIF				NEGATIF
hs190	hs190	32	1989-10-10	Melayu	Female	Citizen	No 26 Jalan Meranti 8A/6, Seksyen 3, Bandar Utama 44300 Batang Kali	3.45427	101.655		Selangor		HKKB				HCW				23.3.2020	23.3.2020	25.3.2020	NEGATIF	30.3.2020	4.4.2020	NEGATIF	NEGATIF
hs191	hs191	30	26/12/1990	Melayu	Male	Citizen	Hospital Kuala Kubu Baru	3.56435	101.653		Selangor		HKKB				HCW				23.3.2020	23.3.2020	28.3.2020	NEGATIF				NEGATIF
hs192	hs192	37	1984-10-11	Melayu	Male	Citizen	Hospital Kuala Kubu Baru	3.56435	101.653		Selangor		HKKB				HCW				23.3.2020	23.3.2020	28.3.2020	NEGATIF				NEGATIF
hs193	hs193	47	19/10/1974	Melayu	Female	Citizen	Hospital Kuala Kubu Baru	3.56435	101.653		Selangor		HKKB				HCW				23.3.2020	23.3.2020	28.3.2020	NEGATIF				NEGATIF
hs194	hs194	29	21/8/1992	Cina	Female	Citizen	Hospital Kuala Kubu Baru	3.56435	101.653		Selangor		HKKB				HCW				23.3.2020	23.3.2020	28.3.2020	NEGATIF	30.3.2020	4.4.2020	NEGATIF	NEGATIF
hs195	hs195	29	1992-05-11	Melayu	Female	Citizen	Hospital Kuala Kubu Baru	3.56435	101.653		Selangor		HKKB				HCW				23.3.2020	23.3.2020	28.3.2020	NEGATIF				NEGATIF
hs196	hs196	27	1994-10-04	Melayu	Female	Citizen	Hospital Kuala Kubu Baru	3.56435	101.653		Selangor		HKKB				HCW				23.3.2020	23.3.2020	28.3.2020	NEGATIF				NEGATIF
hs197	hs197	40	1981-03-09	Melayu	Female	Citizen	Hospital Kuala Kubu Baru	3.56435	101.653		Selangor		HKKB				HCW				23.3.2020	23.3.2020	28.3.2020	NEGATIF	30.3.2020	4.4.2020	NEGATIF	NEGATIF
hs198	hs198	29	1992-11-08	Melayu	Female	Citizen	Hospital Kuala Kubu Baru	3.56435	101.653		Selangor		HKKB				HCW				23.3.2020	23.3.2020	28.3.2020	NEGATIF				NEGATIF
hs199	hs199	31	1990-01-06	Melayu	Female	Citizen	Hospital Kuala Kubu Baru	3.56435	101.653		Selangor		HKKB				HCW				23.3.2020	23.3.2020	28.3.2020	NEGATIF				NEGATIF
hs2	hs2	27	22/8/1994	Melayu	Male	Citizen	No 49, Jalan Melor 8, Desa Melor, 48200 Serendah, Selangor	3.35774	101.631		Selangor	Serendah		TIDAK BEKERJA	NO		KELUARGA				9.3.2020	2020-10-03	2020-10-03	NEGATIF				NEGATIF
hs20	hs20	42	14/9/1979	Melayu	Female	Citizen	Hospital Kuala Kubu Baru	3.56435	101.653		Selangor									DAERAH	11.3.2020	15/3/2020	17/3/2020	NEGATIF				NEGATIF
hs200	hs200	41	20/4/1980	India	Female	Citizen	Hospital Kuala Kubu Baru	3.56435	101.653		Selangor		HKKB				HCW				23.3.2020	23.3.2020	28.3.2020	NEGATIF				NEGATIF
hs201	hs201	39	1982-10-09	Melayu	Female	Citizen	Hospital Kuala Kubu Baru	3.56435	101.653		Selangor		HKKB				HCW				23.3.2020	23.3.2020	28.3.2020	NEGATIF				NEGATIF
hs202	hs202	37	1984-06-10	Melayu	Female	Citizen	Hospital Kuala Kubu Baru	3.56435	101.653		Selangor		HKKB				HCW				23.3.2020	23.3.2020	28.3.2020	NEGATIF				NEGATIF
hs203	hs203	37	1984-09-10	Melayu	Female	Citizen	Hospital Kuala Kubu Baru	3.56435	101.653		Selangor		HKKB				HCW				23.3.2020	23.3.2020	28.3.2020	NEGATIF	30.3.2020	4.4.2020	NEGATIF	NEGATIF
hs204	hs204	48	22/2/1973	India	Female	Citizen	Hospital Kuala Kubu Baru	3.56435	101.653		Selangor		HKKB				HCW				23.3.2020	23.3.2020	28.3.2020	NEGATIF				NEGATIF
hs205	hs205	50	21/4/1971	Melayu	Male	Citizen	Hospital Kuala Kubu Baru	3.56435	101.653		Selangor		HKKB				HCW				23.3.2020	23.3.2020	28.3.2020	NEGATIF				NEGATIF
hs206	hs206	40	1981-09-06	Melayu	Male	Citizen	Hospital Kuala Kubu Baru	3.56435	101.653		Selangor		HKKB				HCW				23.3.2020	23.3.2020	28.3.2020	NEGATIF				NEGATIF
hs207	hs207	31	21/11/1990	Melayu	Male	Citizen	Hospital Kuala Kubu Baru	3.56435	101.653		Selangor		HKKB				HCW				23.3.2020	23.3.2020	28.3.2020	NEGATIF				NEGATIF
hs208	hs208	31	16/8/1990	Melayu	Male	Citizen	Hospital Kuala Kubu Baru	3.56435	101.653		Selangor		HKKB				HCW				23.3.2020	23.3.2020	28.3.2020	NEGATIF	30.3.2020	4.4.2020	NEGATIF	NEGATIF
hs209	hs209	56	31/5/1965	Melayu	Female	Citizen	Hospital Kuala Kubu Baru	3.56435	101.653		Selangor		HKKB				HCW				23.3.2020	23.3.2020	28.3.2020	NEGATIF				NEGATIF
hs21	hs21	49	15/8/1972	India	Female	Citizen	Hospital Kuala Kubu Baru	3.56435	101.653		Selangor									DAERAH	11.3.2020	15/3/2020	17/3/2020	NEGATIF				NEGATIF
hs210	hs210	38	1983-04-07	Melayu	Male	Citizen	Hospital Kuala Kubu Baru	3.56435	101.653		Selangor		HKKB				HCW				23.3.2020	23.3.2020	28.3.2020	NEGATIF				NEGATIF
hs211	hs211	30	28/12/1990	India	Male	Citizen	Hospital Kuala Kubu Baru	3.56435	101.653		Selangor		HKKB				HCW				23.3.2020	23.3.2020	28.3.2020	NEGATIF				NEGATIF
hs212	hs212	43	27/5/1978	India	Male	Citizen	Hospital Kuala Kubu Baru	3.56435	101.653		Selangor		HKKB				HCW				23.3.2020	23.3.2020	28.3.2020	NEGATIF				NEGATIF
hs213	hs213	31	1990-05-08	Melayu	Female	Citizen	No. 8 Jalan Teratai 8, Taman Seri Teratai, KKB 44000 Selangor	3.55985	101.646		Selangor		HKKB				HCW				23.3.2020	23.3.2020	25.3.2020	NEGATIF	30.3.2020	4.4.2020	NEGATIF	NEGATIF
hs214	hs214	32	29/11/1989	Melayu	Female	Citizen	No 8 Jalan Teratai 8 Taman Seri Teratai, 4400 KKB	3.56001	101.647		Selangor		HKKB				HCW				23.3.2020	23.3.2020	28.3.2020	NEGATIF	30.3.2020	4.4.2020	NEGATIF	NEGATIF
hs215	hs215	57	29/5/1964	Melayu	Male	Citizen	No 8 Jalan Seroja 3a/2 Bs6 Bs	3.41473	101.582		Selangor						SURAU			TABLIGH	26.3.2020	26.03.2020	2.4..2020	NEGATIF				NEGATIF
hs216	hs216	26	1995-05-11	Melayu	Male	Citizen	No. 31, Jln Widuri 2E/2, Bukit Beruntung	3.43467	101.594		Selangor						KELUARGA			TABLIGH	25.3.2020	24.3.2020	1.4.2020	NEGATIF				NEGATIF
hs217	hs217	2	2019-07-06	Melayu	Female	Citizen	No. 31, Jln Widuri 2E/2, Bukit Beruntung	3.43467	101.594		Selangor						KELUARGA			TABLIGH	25.3.2020	24.3.2020	1.4.2020	NEGATIF				NEGATIF
hs218	hs218	31	1990-09-08	Melayu	Male	Citizen	No. 31, Jln Widuri 2E/2, Bukit Beruntung	3.43467	101.594		Selangor						KELUARGA			TABLIGH	25.3.2020	24.3.2020	1.4.2020	NEGATIF				NEGATIF
hs219	hs219	31	24/9/1990	Melayu	Female	Citizen	No. 31, Jln Widuri 2E/2, Bukit Beruntung	3.43467	101.594		Selangor						KELUARGA			TABLIGH	25.3.2020	24.3.2020	1.4.2020	NEGATIF				NEGATIF
hs22	hs22	26	27/10/1995	Melayu	Female	Citizen	Hospital Kuala Kubu Baru	3.56435	101.653		Selangor									DAERAH	15.03.2021	15/3/2020	17/3/2020	NEGATIF				NEGATIF
hs220	hs220	23	1998-07-11	Melayu	Male	Citizen	No. 13 Jln Seroja 5c, Bukit Sentosa	3.41253	101.584		Selangor						KELUARGA			TABLIGH	25.3.2020	24.3.2020	1.4.2020	NEGATIF				NEGATIF
hs221	hs221	21	2000-02-11	Melayu	Male	Citizen	No. 13 Jln Seroja 5c, Bukit Sentosa	3.41253	101.584		Selangor						KELUARGA			TABLIGH	25.3.2020	24.3.2020	1.4.2020	NEGATIF				NEGATIF
hs222	hs222	20	2001-03-06	Melayu	Female	Citizen	No. 13 Jln Seroja 5c, Bukit Sentosa	3.41253	101.584		Selangor						KELUARGA			TABLIGH	25.3.2020	24.3.2020	1.4.2020	NEGATIF				NEGATIF
hs223	hs223	66	30/5/1955	Melayu	Male	Citizen	No 17 Jln Seroja 5a/5 Bkit Sentosa	3.41378	101.584		Selangor						SURAU			TABLIGH	26.3.2020	25.3.2020	31.03.2020	NEGATIF				NEGATIF
hs224	hs224	51	27/9/1970	Melayu	Male	Citizen	No 53 Jln Seroja 3a Bs6 Bukit Sentosa	3.42451	101.565		Selangor						SURAU			TABLIGH	26.3.2020	26.03.2020	2.4..2020	NEGATIF				NEGATIF
hs225	hs225	51	27/7/1970	Melayu	Male	Citizen	No 41 Jln Seroja 5a/5 Bs	3.41378	101.583		Selangor						SURAU			TABLIGH	26.3.2020	26.03.2020	2.4.2020	NEGATIF				NEGATIF
hs226	hs226	50	1971-08-05	Melayu	Male	Citizen	No 1 Jln Seroja 5c Bs	3.41214	101.584		Selangor						SURAU			TABLIGH	26.3.2020	26.03.2020	2.4.2020	NEGATIF				NEGATIF
hs227	hs227	37	1984-08-05	Melayu	Male	Citizen	No 11 Jln Seroja 3a/4 Bs	3.41497	101.583		Selangor						SURAU			TABLIGH	26.3.2020	26.03.2020	2.4.2020	NEGATIF				NEGATIF
hs228	hs228	47	27/3/1974	Melayu	Male	Citizen	No 45 Jln Seroja 5a/2 Bs	3.41163	101.583		Selangor						SURAU			TABLIGH	26.3.2020	26.03.2020	2.4.2020	NEGATIF				NEGATIF
hs229	hs229	51	28/10/1970	Melayu	Male	Citizen	No 58 Jln Seroja 5a/3 Seksyen Bs6	3.41334	101.582		Selangor						SURAU			TABLIGH	26.3.2020	26.03.2020	2.4.2020	NEGATIF				NEGATIF
hs23	hs23	34	20/11/1987	Melayu	Female	Citizen	Hospital Kuala Kubu Baru	3.56435	101.653		Selangor									DAERAH	15.03.2021	15/3/2020	17/3/2020	NEGATIF	24.3.2020	25.3.2020	NEGATIF	NEGATIF
hs230	hs230	54	1967-03-01	Melayu	Male	Citizen	No 17 Jln Seroja 5a/1 Seksyen Bs6	3.41124	101.582		Selangor						SURAU			TABLIGH	26.3.2020	26.03.2020	3.4.2020	SAMPLE REJECTED	8.4.2020	10.4.2020	NEGATIF	NEGATIF
hs231	hs231	55	31/1/1966	Melayu	Male	Citizen	No 21 Jln Seroja 3a Seksyen Bs6 Bs	3.41386	101.585		Selangor						SURAU			TABLIGH	26.3.2020	26.03.2020	3.4.2020	SAMPLE REJECTED	8.4.2020	10.4.2020	NEGATIF	NEGATIF
hs232	hs232	53	19/9/1968	Melayu	Male	Citizen	No 9 Jln Seroja 3a/4 Seksyen Bs6 Bs	3.41498	101.583		Selangor						SURAU			TABLIGH	26.3.2020	26.03.2020	2.4.2020	NEGATIF				NEGATIF
hs233	hs233	50	1971-08-05	Melayu	Male	Citizen	No 21 Jln Seroja 3a/2 Seksyen Bs6	3.41449	101.582		Selangor						SURAU			TABLIGH	26.3.2020	26.03.2020	2.4.2020	NEGATIF				NEGATIF
hs234	hs234	51	27/12/1969	Melayu	Male	Citizen	No 23, Jalan Seroja 3A/2, Seksyen 6, Bukit Sentosa	3.41457	101.582		Selangor						SURAU			TABLIGH- Rakan surau	27.3.2020	26.3.2020	3.4.2020	NEGATIF				NEGATIF
hs235	hs235	32	1989-03-04	Melayu	Male	Citizen	no 85 jln 28 Desa Jaya Kepong	3.21912	101.627		Selangor						SOSIAL							NEGATIF				NEGATIF
hs236	hs236			Foreigner	Male	Non-citizen	E3-01--20 Court 5 usj 7	3.05551	101.592		Selangor						SOSIAL							NEGATIF				NEGATIF
hs237	hs237	20	22/6/2001	Melayu	Female	Citizen	No 17, Jalan Ros 2A/1, Bukit Sentosa	3.37597	101.574		Selangor						SEKOLAH			DAERAH	28.3.2020	27.3.2020	4.4.2020	NEGATIF				NEGATIF
hs238	hs238	20	22/2/2001	India	Female	Citizen	No 31, Jalan Teluki 2, Bukit Sentosa	3.40162	101.57		Selangor						SEKOLAH			DAERAH	28.3.2020	27.3.2020	1.4.2020	NEGATIF				NEGATIF
hs239	hs239	20	24/3/2001	Melayu	Female	Citizen	No 1, Jalan Anggerik 3B/5, Bukit Beruntung	3.43223	101.571		Selangor						SEKOLAH			DAERAH	28.3.2020	27.3.2020	1.4.2020	NEGATIF				NEGATIF
hs24	hs24	36	31/1/1985	Melayu	Female	Citizen	Hospital Kuala Kubu Baru	3.56435	101.653		Selangor									DAERAH	15.03.2021	15/3/2020	17/3/2020	NEGATIF				NEGATIF
hs240	hs240	20	2001-11-06	Melayu	Female	Citizen	No 21, Jalan Teluki 3A, Bukit Sentosa	3.39938	101.569		Selangor						SEKOLAH			DAERAH	28.3.2020	27.3.2020	1.4.2020	NEGATIF				NEGATIF
hs241	hs241	20	25/6/2001	Melayu	Male	Citizen	FG-01 Apt Seri Inai, Jalan Anggerik 3, Bukit Beruntung	3.43267	101.571		Selangor						SEKOLAH			DAERAH	28.3.2020	27.3.2020	1.4.2020	NEGATIF				NEGATIF
hs242	hs242	19	24/12/2001	Cina	Female	Citizen	No 7, Jalan Tanjung 2A, Bukit Sentosa	3.39967	101.564		Selangor						SEKOLAH			DAERAH	28.3.2020	27.3.2020	1.4.2020	NEGATIF				NEGATIF
hs243	hs243	20	20/6/2001	Melayu	Female	Citizen	SKF-1-01 Apt seri Kemboja 4A/8, Bukit Sentosa	3.41452	101.594		Selangor						SEKOLAH			DAERAH	28.3.2020	27.3.2020	1.4.2020	NEGATIF				NEGATIF
hs244	hs244	20	20/1/2001	Melayu	Female	Citizen	B-2-11 Apt Cempaka, Jalan Bunga Raya, Taman Bunga Raya	3.43794	101.548		Selangor						SEKOLAH			DAERAH	28.3.2020	27.3.2020	1.4.2020	NEGATIF				NEGATIF
hs245	hs245	20	19/3/2001	Melayu	Female	Citizen	SCH-2-13A Apartment Sri Cempaka, Bukit Sentosa				Selangor						SEKOLAH			DAERAH	28.3.2020	27.3.2020	1.4.2020	NEGATIF				NEGATIF
hs246	hs246	20	2001-02-07	Melayu	Female	Citizen	No 23, Jlan Gapi 2C/9, Antara Gapi, Serendah	3.42477	101.638		Selangor						SEKOLAH			DAERAH	28.3.2020	27.3.2020	1.4.2020	NEGATIF				NEGATIF
hs247	hs247	20	15/2/2001	Melayu	Male	Citizen	No 17, Jalan Kemboja 4B/5, Bukit sentosa	3.41304	101.597		Selangor						SEKOLAH			DAERAH	28.3.2020	27.3.2020	1.4.2020	NEGATIF				NEGATIF
hs248	hs248	20	21/2/2001	Melayu	Male	Citizen	No 41, Jalan Kemboja 4A/6, Bukit Sentosa	3.41616	101.593		Selangor						SEKOLAH			DAERAH	28.3.2020	27.3.2020	1.4.2020	NEGATIF				NEGATIF
hs249	hs249	20	2001-02-03	Melayu	Female	Citizen	No 47, Jalan Melursari 13, Bandar Sg Buaya, 48300 Rawang	3.37973	101.533		Selangor						SEKOLAH			DAERAH	28.3.2020	27.3.2020	4.4.2020	NEGATIF				NEGATIF
hs25	hs25	30	18/5/1991	India	Female	Citizen	Hospital Kuala Kubu Baru	3.56435	101.653		Selangor									DAERAH	15.03.2021	15/3/2020	17/3/2020	NEGATIF				NEGATIF
hs250	hs250	20	2001-03-01	Melayu	Male	Citizen	No 7, Jalan Anggerik 5B, Bukit Beruntung	3.43242	101.571		Selangor						SEKOLAH			DAERAH	28.3.2020	27.3.2020	4.4.2020	NEGATIF				NEGATIF
hs251	hs251	20	2001-07-02	Melayu	Male	Citizen	Lot 789A, Jalan Dewan Kg Hilir Indah				Selangor						SEKOLAH			DAERAH	28.3.2020	27.3.2020	4.4.2020	NEGATIF				NEGATIF
hs252	hs252	20	18/3/2001	Melayu	Female	Citizen	No 28, Jalan Widuri 20/1, Taman Widuri 48300 Rawang	3.43613	101.593		Selangor						SEKOLAH			DAERAH	28.3.2020	27.3.2020	4.4.2020	NEGATIF				NEGATIF
hs253	hs253	20	26/10/2001	India	Female	Citizen	No 27A, Jalan Teratai 8, Taman Bukit Teratai, Sg Choh	3.11503	101.764		Selangor						SEKOLAH			DAERAH	28.3.2020	27.3.2020	4.4.2020	NEGATIF				NEGATIF
hs254	hs254	20	24/11/2001	Melayu	Female	Citizen	No 1, Jalan Anggerik 5D/1, Bukit Sentosa	3.41306	101.591		Selangor						SEKOLAH			DAERAH	28.3.2020	27.3.2020	4.4.2020	NEGATIF				NEGATIF
hs255	hs255	20	2001-04-06	Melayu	Female	Citizen	No 19, jalan Kembojasari 8, Bandar Sg Buaya	3.38187	101.535		Selangor						SEKOLAH			DAERAH	28.3.2020	27.3.2020	4.4.2020	NEGATIF				NEGATIF
hs256	hs256	20	19/5/2001	Melayu	Female	Citizen	A-2-03A Apt Dahlia, Bukit Beruntung	3.43757	101.548		Selangor						SEKOLAH			DAERAH	28.3.2020	27.3.2020	4.4.2020	NEGATIF				NEGATIF
hs257	hs257	20	2001-09-07	Melayu	Female	Citizen	No 22, Jalan 1D/15, Seksyen 1, Taman Antara Gapi	3.42751	101.642		Selangor						SEKOLAH			DAERAH	28.3.2020	27.3.2020	4.4.2020	NEGATIF				NEGATIF
hs258	hs258	20	2001-03-04	Melayu	Female	Citizen	Jalan Orkid 1F/2, Bukit Sentosa	3.40402	101.559		Selangor						SEKOLAH			DAERAH	29.3.2020	27.3.2020	4.4.2020	NEGATIF				NEGATIF
hs259	hs259	20	22/10/2001	India	Female	Citizen	No 25, Jalan Lili, Taman Idaman, Serendah	3.36609	101.615		Selangor						SEKOLAH			DAERAH	29.3.2020	27.3.2020	30.3.2020	SAMPLE REJECTED	31.3.2020	5.4.2020	NEGATIF	NEGATIF
hs26	hs26	29	1992-12-10	India	Female	Citizen	Hospital Kuala Kubu Baru	3.56435	101.653		Selangor									DAERAH	15.03.2021	15/3/2020	17/3/2020	NEGATIF				NEGATIF
hs260	hs260	20	17/2/2001	Melayu	Female	Citizen	No 117, Jalan Tulip 3, Seksyen BS2, Bukit Sentosa	3.39633	101.567		Selangor						SEKOLAH			DAERAH	29.3.2020	27.3.2020	4.4.2020	NEGATIF				NEGATIF
hs261	hs261	20	29/6/2001	Melayu	Male	Citizen	No 10, Jalan Bakawali 24/2, Seksyen BS10, Bukit Sentosa	3.40758	101.603		Selangor						SEKOLAH			DAERAH	29.3.2020	27.3.2020	4.4.2020	NEGATIF				NEGATIF
hs262	hs262			Melayu	Female	Citizen	868, Kg Tanjung, sg Choh				Selangor						SEKOLAH			DAERAH	29.3.2020	27.3.2020	30.3.2020	NEGATIF				NEGATIF
hs263	hs263	53	28/7/1968	Melayu	Female	Citizen	No 19, Jalan Kekwa 4A, Seksyen BB2, Bukit Beruntung	3.43268	101.553		Selangor						SEKOLAH			DAERAH	29.3.2020	27.3.2020	4.4.2020	NEGATIF				NEGATIF
hs264	hs264	55	1966-09-08	Melayu	Male	Citizen	107, Jalan Matahari 2, Taman Serendah Utama	3.37039	101.615		Selangor						SEKOLAH			DAERAH	29.3.2020	27.3.2020	4.4.2020	NEGATIF				NEGATIF
hs265	hs265	51	1970-03-04	Melayu	Female	Citizen	No 1, Jalan Kemboja 4C/1, Bukit Sentosa 3	3.41148	101.596		Selangor						SEKOLAH			DAERAH	29.3.2020	27.3.2020	4.4.2020	NEGATIF				NEGATIF
hs266	hs266	54	13/7/1967	India	Male	Citizen	No 1, Jalan Tanjung 1A, BB7, Bukit Beruntung	3.42139	101.567		Selangor						SEKOLAH			DAERAH	29.3.2020	27.3.2020	4.4.2020	NEGATIF				NEGATIF
hs267	hs267	20	27/8/2001	Melayu	Female	Citizen	B-1-05 Jln Bunga Raya 1, Blok B, Apartment Dahlia, Tmn Bukit Beruntung	3.43757	101.548		Selangor						SEKOLAH			DAERAH	29.3.2020	27.3.2020	3.4.2020	NEGATIF				NEGATIF
hs268	hs268	54	1967-11-10	Melayu	Female	Citizen	No 205, Kg Sungai Buaya	3.37451	101.533		Selangor						SEKOLAH			DAERAH	7.4.2020	31.3.2020	4.4.2020	NEGATIF				NEGATIF
hs269	hs269	20	27/5/2001	Melayu	Female	Citizen	43, JLN ANGGERIK 1D, SEK BB4, BKT BERUNTUNG, RAWANG 48300 RAWANG	3.41897	101.59		Selangor						SEKOLAH							NEGATIF				NEGATIF
hs27	hs27	35	13/11/1986	Melayu	Female	Citizen	Hospital Kuala Kubu Baru	3.56435	101.653		Selangor									DAERAH	15.03.2021	15/3/2020	16/3/2020	NEGATIF				NEGATIF
hs270	hs270	19	16/12/2001	Melayu	Male	Citizen	NO SKF-G-03A APT SERI KEMBOJA JALAN KEMBOJA 4A/8 SEK BS8 BUKT SENTOSA 48300 RAWANG	3.41452	101.594		Selangor						SEKOLAH							NEGATIF				NEGATIF
hs271	hs271	20	30/5/2001	Melayu	Male	Citizen	NO 123, JALAN TULIP 1, 52000 RAWANG	3.39716	101.567		Selangor						SEKOLAH							NEGATIF				NEGATIF
hs272	hs272	19	17/12/2001	Melayu	Male	Citizen	1000, KG SG CHOH 48000 RAWANG	3.35201	101.582		Selangor						SEKOLAH							NEGATIF				NEGATIF
hs273	hs273	20	25/5/2001	Melayu	Male	Citizen	NO 11 A, JALAN KESUMBA 3A, BUKIT BERUNTUNG 3 48300 RAWANG	3.42964	101.596		Selangor						SEKOLAH							NEGATIF				NEGATIF
hs274	hs274	20	24/3/2001	Melayu	Female	Citizen	NO 1 JALAN ANGGERIK 3B/5 48300 RAWANG	3.41772	101.582		Selangor						SEKOLAH							NEGATIF				NEGATIF
hs275	hs275	47	1974-06-04	Melayu	Male	Citizen	No 12 Jln Anggerik 2J, Tmn Desa Anggerik,48200 Serendah	3.35723	101.618		Selangor						SEKOLAH							NEGATIF				NEGATIF
hs276	hs276	21	2000-07-05	Melayu	Male	Citizen	No 14, Jalan 14, Taman Ampang Pecah, Kuala Kubu Bharu	3.54853	101.659		Selangor						KELUARGA			DAERAH	27.03.2020	26.3.2020	4.4.2020	NEGATIF				NEGATIF
hs277	hs277	17	31/3/2004	Melayu	Male	Citizen	No 14, Jalan 14, Taman Ampang Pecah, Kuala Kubu Bharu	3.54853	101.659		Selangor						KELUARGA			DAERAH	27.03.2020	26.3.2020	3.4.2020	NEGATIF				NEGATIF
hs278	hs278	24	1997-01-05	Melayu	Male	Citizen	No 14, Jalan 14, Taman Ampang Pecah, Kuala Kubu Bharu	3.54853	101.659		Selangor						KELUARGA			DAERAH	27.03.2020	26.3.2020	4.4.2020	NEGATIF				NEGATIF
hs279	hs279	19	2002-03-04	Melayu	Male	Citizen	No 14, Jalan 14, Taman Ampang Pecah, Kuala Kubu Bharu	3.54853	101.659		Selangor						KELUARGA			DAERAH	27.03.2020	26.3.2020	4.4.2020	NEGATIF				NEGATIF
hs28	hs28	38	27/11/1983	Melayu	Female	Citizen	Hospital Kuala Kubu Baru	3.56435	101.653		Selangor									DAERAH	15.03.2021	15/3/2020	17/3/2020	NEGATIF				NEGATIF
hs280	hs280	23	26/9/1998	Melayu	Female	Citizen	No 14, Jalan 14, Taman Ampang Pecah, Kuala Kubu Bharu	3.54853	101.659		Selangor						KELUARGA			DAERAH	27.03.2020	26.3.2020	4.4.2020	NEGATIF				NEGATIF
hs281	hs281	13	2008-09-05	Melayu	Female	Citizen	No 14, Jalan 14, Taman Ampang Pecah, Kuala Kubu Bharu	3.54853	101.659		Selangor						KELUARGA			DAERAH	27.03.2020	26.3.2020	4.4.2020	NEGATIF				NEGATIF
hs282	hs282	25	15/2/1996	Melayu	Male	Citizen	No 11, Jalan Geriang Utama 2, Taman Seri Geriang, Hulu Bernam	3.66857	101.525		Selangor						TABLIGH			TABLIGH	27.3.2020	26.3.2020	3.4.2020	NEGATIF	4.4.2020	8.4.2020	NEGATIF	NEGATIF
hs283	hs283	48	1973-09-05	Melayu	Male	Citizen	No 11, Jalan Geriang Utama 2, Taman Seri Geriang, Hulu Bernam	3.66857	101.525		Selangor						TABLIGH			TABLIGH	28.3.2020	26.3.2020	4.4.2020	NEGATIF	4.4.2020	8.4.2020	NEGATIF	NEGATIF
hs284	hs284	23	1998-02-10	Melayu	Male	Citizen	No 11, Jalan Geriang Utama 2, Taman Seri Geriang, Hulu Bernam	3.66857	101.525		Selangor						TABLIGH			TABLIGH	27.3.2020	26.3.2020	4.4.2020	NEGATIF	4.4.2020	8.4.2020	NEGATIF	NEGATIF
hs285	hs285	57	19/8/1964	Melayu	Male	Citizen	No 11, Jalan Geriang Utama 2, Taman Seri Geriang, Hulu Bernam	3.66857	101.525		Selangor						TABLIGH			TABLIGH	27.3.2020	26.3.2020	3.4.2020	NEGATIF				NEGATIF
hs286	hs286	51	17/7/1970	Melayu	Female	Citizen	No 14, Jalan 14, Taman Ampang Pecah, Kuala Kubu Bharu	3.54853	101.659		Selangor						KELUARGA			TABLIGH	27.3.2020	26.3.2020	3.4.2020	NEGATIF				NEGATIF
hs287	hs287	24	16/4/1996	Melayu	Male	Citizen	No 11, Jalan Geriang Utama 2, Taman Seri Geriang, Hulu Bernam	3.66857	101.525		Selangor						TABLIGH			TABLIGH	27.3.2020	26.3.2020	4.4.2020	NEGATIF	4.4.2020	8.4.2020	NEGATIF	NEGATIF
hs288	hs288	19	29/12/2001	Melayu	Male	Citizen	No 11, Jalan Geriang Utama 2, Taman Seri Geriang, Hulu Bernam	3.66857	101.525		Selangor						TABLIGH			TABLIGH	27.3.2020	26.3.2020	4.4.2020	NEGATIF	4.4.2020	8.4.2020	NEGATIF	NEGATIF
hs289	hs289	43	1978-04-05	Melayu	Male	Citizen	No 11, Jalan Geriang Utama 2, Taman Seri Geriang, Hulu Bernam	3.66857	101.525		Selangor						TABLIGH			TABLIGH	3.4.2020	26.3.2020	3.4.2020	NEGATIF	4.4.2020	8.4.2020	NEGATIF	NEGATIF
hs29	hs29	32	22/4/1989	Melayu	Female	Citizen	Hospital Kuala Kubu Baru	3.56435	101.653		Selangor									DAERAH	15.03.2021	15/3/2020	17/3/2020	NEGATIF				NEGATIF
hs290	hs290	36	29/3/1985	Melayu	Male	Citizen	No 8, Jalan Aman 3/59, PJ	3.08807	101.649		Selangor									DAERAH	27.03.2020	25.3.2020		NEGATIF				NEGATIF
hs291	hs291	55	23/7/1966	Melayu	Female	Citizen	No. 12 Jln Gapimas 3, Antara Gapi	3.42184	101.627		Selangor									DAERAH	26.3.2020	25.3.2020		NEGATIF				NEGATIF
hs292	hs292	45	1976-02-02	Melayu	Female	Citizen	No 41C Jalan Orkid 2B Seksyen BS2, Bukit Sentosa	3.40218	101.558		Selangor									DAERAH	27.3.2020	26.3.2020	3.4.2020	NEGATIF				NEGATIF
hs293	hs293	35	14/3/1986	Melayu	Female	Citizen	No 36, Jalan SP 10/11, Bandar saujana Putra	2.92837	101.578		Selangor									DAERAH	27.3.2020	25.3.2020		NEGATIF				NEGATIF
hs294	hs294	49	1972-07-03	Melayu	Female	Citizen	No. 12 Jalan Gapimas 2, Antara Gapi	3.42114	101.627		Selangor									HCW	27.3.2020	26.3.2020		NEGATIF				NEGATIF
hs295	hs295	36	14/1/1985	Melayu	Female	Citizen	D 1, Kuarters KK Serendah	3.36393	101.603		Selangor									HCW	27.3.2020	14.5.2020	16.5.2020	NEGATIF	18.5.2020	19.5.2020	NEGATIF	NEGATIF
hs296	hs296	48	25/11/1973	India	Female	Citizen	B-1-1 Kuarters KK Serendah	3.36393	101.603		Selangor									HCW	27.3.2020	25.3.2020		NEGATIF				NEGATIF
hs297	hs297	20	24/6/2001	Melayu	Female	Citizen	No. 7 Jalan Seroja 5B/1 Bukit Sentosa	3.412	101.583		Selangor									DAERAH	30.3.2020	27.3.2020	3.4.2020	NEGATIF				NEGATIF
hs298	hs298	24	1997-08-04	Melayu	Female	Citizen	No. 25 Jalan Kembojasari 7, Bandar Baru Sungai Buaya	3.38124	101.535		Selangor									DAERAH	30.3.2020		3.4.2020	NEGATIF				NEGATIF
hs299	hs299	50	1971-11-01	Melayu	Male	Citizen	No 29, Jalan Kemboja 4C/5, Bukit Sentosa	3.40972	101.594		Selangor									TABLIGH	30.03.2020	30.3.2020	4.4.2020	NEGATIF				NEGATIF
hs3	hs3	22	1999-07-04	Melayu	Male	Citizen	No 49, Jalan Melor 8, Desa Melor, 48200 Serendah, Selangor	3.35774	101.631		Selangor	Serendah		PRAKTIKAL TRAINING KILANG BANDO, RAWANG	NO		KELUARGA				9.3.2020	2020-10-03	2020-10-03	NEGATIF				NEGATIF
hs30	hs30	35	1986-05-01	Melayu	Female	Citizen	Hospital Kuala Kubu Baru	3.56435	101.653		Selangor									DAERAH	15.03.2021	15/3/2020	17/3/2020	NEGATIF				NEGATIF
hs300	hs300			Foreigner	Male	Non-citizen	No 23, Jalan Kemboja 4C/7, Bukit Sentosa	3.41122	101.594		Selangor									TABLIGH	30.3.2020	30.3.2020	4.4.2020	NEGATIF				NEGATIF
hs301	hs301	61	25/3/1960	Melayu	Male	Citizen	No 24 Jalan Kemboja 4C/8 Sek Bukit Sentosa 8 Bukit Sentosa	3.41141	101.593		Selangor									TABLIGH	30.3.2020	27.3.2020	3.4.2020	NEGATIF				NEGATIF
hs302	hs302	37	1984-04-04	Melayu	Male	Citizen	No. 3, Jalan Ros 2A/3 Seksyen BS5, Bukit Sentosa	3.39955	101.582		Selangor									TABLIGH	26.3.2020	26.3.2020	3.4.2020	NEGATIF				NEGATIF
hs303	hs303	28	18/8/1993	Melayu	Male	Citizen	No. 23, Jalan Kemboja 4C/5, Seksyen BS 8, Bukit Sentosa 3, 48300, Rawang	3.41194	101.595		Selangor						KELUARGA			TABLIGH	26.3.2022	26.3.2021	4.4.2020	SAMPLE REJECTED	6.4.2020	8.4.2020	NEGATIF	NEGATIF
hs304	hs304	44	28/11/1977	Melayu	Male	Citizen	No. 25 Jalan Kemboja 4C/5 Seksyen Bukit Sentosa 8	3.40972	101.594		Selangor									TABLIGH	31.3.2020	30.3.2020	4.4.2020	NEGATIF				NEGATIF
hs305	hs305	44	1977-04-11	Melayu	Male	Citizen	No 2, Jalan Kemboja 4C/11, Bukit Sentosa	3.41041	101.593		Selangor									TABLIGH	31.3.2020	30.3.2030	4.4.2020	NEGATIF				NEGATIF
hs306	hs306	15	16/2/2006	Melayu	Male	Citizen	No. 7 Jalan Kemboja 4C/7 Seksyen Bukit Sentosa	3.41175	101.594		Selangor									TABLIGH	31.3.2020	30.3.2020	4.4.2020	NEGATIF				NEGATIF
hs307	hs307	54	15/1/1967	Melayu	Male	Citizen	No 19. Jalan Kemboja Bin Rusman	1.33104	103.874		Selangor									TABLIGH	31.3.2020	30.3.2020	4.4.2020	NEGATIF				NEGATIF
hs308	hs308	53	13/1/1968	Melayu	Male	Citizen	No. 6 Jalan Kemboja 4C/9 Seksyen Bukit Sentosa 8	3.4109	101.593		Selangor									TABLIGH	30.3.2020	30.3.2020	4.4.2020	NEGATIF				NEGATIF
hs309	hs309	67	1954-12-08	Melayu	Male	Citizen	No 26 Jalan Kemboja 4C/8 Bukit Sentosa 8, Bukit Sentosa	3.41452	101.594		Selangor									TABLIGH	31.3.2020	30.3.2020	4.4.2020	NEGATIF				NEGATIF
hs31	hs31	46	1975-11-01	Melayu	Female	Citizen	Hospital Kuala Kubu Baru	3.56435	101.653		Selangor									DAERAH	15.03.2021	15/3/2020	17/3/2020	NEGATIF				NEGATIF
hs310	hs310	53	1968-01-01	Melayu	Male	Citizen	No. 59 Jalan Kemboja 4c/5 Bukit Sentosa	3.40964	101.593		Selangor									TABLIGH	29.3.2020	27.3.2020	3.4.2020	NEGATIF				NEGATIF
hs311	hs311	15	2006-04-11	Melayu	Male	Citizen	No. 59 Jalan Kemboja 4c/5 Bukit Sentosa	3.40964	101.593		Selangor									TABLIGH	29.3.2020	27.3.2020	3.4.2020	NEGATIF				NEGATIF
hs312	hs312	13	2008-03-10	Melayu	Male	Citizen	No. 59 Jalan Kemboja 4c/5 Bukit Sentosa	3.40964	101.593		Selangor									TABLIGH	29.3.2020	27.3.2020	3.4.2020	NEGATIF				NEGATIF
hs313	hs313	11	2010-11-01	Melayu	Male	Citizen	No. 59 Jalan Kemboja 4c/5 Bukit Sentosa	3.40964	101.593		Selangor									TABLIGH	29.3.2020	27.3.2020	3.4.2020	NEGATIF				NEGATIF
hs314	hs314	55	28/6/1966	Melayu	Male	Citizen	No. 22, Jln Kemboja 4C/19, Bukit sentosa 3 48300	3.41188	101.595		Selangor									TABLIGH	29.3.2020	27.3.2020	4.4.2020	NEGATIF				NEGATIF
hs315	hs315	61	31/12/1959	Melayu	Male	Citizen	No. 22, Jln Kemboja 4C/19, Bukit sentosa 3 48300	3.41188	101.595		Selangor									TABLIGH	29.3.2020	27.3.2020	3.4.2020	NEGATIF				NEGATIF
hs316	hs316	52	16/9/1969	Melayu	Male	Citizen	No. 8 Jln Kemboja 4C/9 Bukit Sentosa	3.4109	101.593		Selangor									TABLIGH	29.3.2020	27.3.2020	3.4.2020	NEGATIF				NEGATIF
hs317	hs317	52	1969-03-03	Melayu	Male	Citizen	No 27 Jalan Kemboja 4C/2 Seksyen Bukit Sentosa 8	3.41202	101.594		Selangor									TABLIGH	30.3.2020	30.3.2020	4.4.2020	NEGATIF				NEGATIF
hs318	hs318	54	1967-04-05	Melayu	Male	Citizen	No. 6, Jalan Kemboja 4C/2, Seksyen BS 8, Bukit Sentosa 3, 48300 Rawang	3.41101	101.595		Selangor									TABLIGH	7.4.2020	31.3.2020	4.4.2020	NEGATIF				NEGATIF
hs319	hs319	37	1984-07-11	Melayu	Male	Citizen	BLOCK A-8-15, BATAI APARTMENT, BATU CAVES	3.26765	101.651		Selangor						KAWAN SEKERJA					26.03.2020		NEGATIF				NEGATIF
hs32	hs32	36	1985-01-04	Melayu	Female	Citizen	Hospital Kuala Kubu Baru	3.56435	101.653		Selangor									DAERAH	15.03.2021	15/3/2020	17/3/2020	NEGATIF				NEGATIF
hs320	hs320	38	21/8/1983	Melayu	Male	Citizen	BLOCK A-7-17, BATAI APARTMENT, SELAYANG HEIGHTS	3.26765	101.651		Selangor						KAWAN SEKERJA							NEGATIF				NEGATIF
hs321	hs321	35	1986-01-01	Melayu	Male	Citizen	A-07-18, BLOCK MAWAR A, TAMAN SELAYANG MULIA	3.26891	101.676		Selangor						KAWAN SEKERJA					26.03.2020		NEGATIF				NEGATIF
hs322	hs322	29	20/12/1991	Melayu	Male	Citizen	NO 16A, KG MELAYU WIRA DAMAI, BATU CAVES	3.24983	101.69		Selangor						KAWAN SEKERJA					26.03.2020		NEGATIF				NEGATIF
hs323	hs323	30	17/3/1991	Melayu	Male	Citizen	LOT 3996-1, JALAN GOMBAK BT 8 1/4, GOMBAK	3.20819	101.703		Selangor						KAWAN SEKERJA					26.03.2020		NEGATIF				NEGATIF
hs324	hs324	35	1986-04-01	Melayu	Male	Citizen	BLOK V1. 10, JALAN PINGGIRAN 2/7, BATU CAVES	3.25452	101.695		Selangor						KAWAN SEKERJA					26.03.2020		NEGATIF				NEGATIF
hs325	hs325	33	1988-11-07	Melayu	Male	Citizen	NO 25, JALAN TIB 2/3, TAMAN INDUSTRY BOLTON, BATU CAVES	3.24682	101.696		Selangor						KAWAN SEKERJA					26.03.2020		NEGATIF				NEGATIF
hs326	hs326	37	1984-04-04	Melayu	Male	Citizen	NO. 3, JALAN ROS 2A/3, BUKIT SENTOSA, RAWANG	3.37524	101.574		Selangor						KAWAN SEKERJA					26.03.2020		NEGATIF				NEGATIF
hs327	hs327	43	20/5/1978	Melayu	Male	Citizen	NO 21, TAMAN PAYA PULAI, TEMERLOH, PAHANG	3.45966	102.465		Selangor						KAWAN SEKERJA					26.03.2020		NEGATIF				NEGATIF
hs328	hs328	38	1983-05-11	Melayu	Male	Citizen	45, JALAN BUKIT PERMAI 3, TAMAN BUKIT PERMAI, KL	3.10823	101.761		Selangor						KAWAN SEKERJA					26.03.2020		NEGATIF				NEGATIF
hs329	hs329	52	1969-07-12	Melayu	Male	Citizen	No. 36 Jalan Kemboja 5A/3 Bukit Sentosa	3.41611	101.597		Selangor						TABLIGH			DAERAH	29.3.2020	14.4.2020	16.4.2020	NEGATIF				NEGATIF
hs33	hs33	35	14/4/1986	Melayu	Female	Citizen	Hospital Kuala Kubu Baru	3.56435	101.653		Selangor									DAERAH	16.03.2021	16.3.2020	18.3.2020	NEGATIF				NEGATIF
hs330	hs330	58	21/10/1963	Melayu	Female	Citizen	No. 36 Jalan Kemboja 5A/3 Bukit Sentosa	3.41611	101.597		Selangor						TABLIGH			DAERAH	29.3.2020	14.4.2020	16.4.2020	NEGATIF				NEGATIF
hs331	hs331	19	20/3/2002	Melayu	Male	Citizen	No. 36 Jalan Kemboja 5A/3 Bukit Sentosa	3.41611	101.597		Selangor									DAERAH	29.3.2020	14.4.2020	16.4.2020	NEGATIF				NEGATIF
hs332	hs332	63	15/9/1958	Melayu	Male	Citizen	NO.5, JALAN KEMBOJA 4A/2, BUKIT SENTOSA	3.41705	101.593		Selangor						TABLIGH							NEGATIF				NEGATIF
hs333	hs333	56	1965-01-05	Melayu	Male	Citizen	NO.29, JALAN KEMBOJA 4A/5, BUKIT SENTOSA	3.41672	101.593		Selangor						TABLIGH							NEGATIF				NEGATIF
hs334	hs334	57	30/6/1964	Melayu	Male	Citizen	NO.48, JALAN KEMBOJA 4A/2, BUKIT SENTOSA	3.41845	101.594		Selangor						TABLIGH							NEGATIF				NEGATIF
hs335	hs335	72	18/2/1949	Melayu	Male	Citizen	NO.7, JALAN KEMBOJA 4A/6, BUKIT SENTOSA	3.41618	101.594		Selangor						TABLIGH							NEGATIF				NEGATIF
hs336	hs336			Melayu	Male	Citizen	NO.11, JALAN KEMBOJA 4A/6, BUKIT SENTOSA	3.41619	101.594		Selangor						TABLIGH							NEGATIF				NEGATIF
hs337	hs337	53	23/7/1968	Melayu	Male	Citizen	NO.31, JALAN KEMBOJA 4A/1, BUKIT SENTOSA	3.41712	101.594		Selangor						TABLIGH							NEGATIF				NEGATIF
hs338	hs338	55	23/9/1966	Melayu	Male	Citizen	NO.41, JALAN KEMBOJA 4A/1, BUKIT SENTOSA	3.41712	101.594		Selangor						TABLIGH							NEGATIF				NEGATIF
hs339	hs339	65	22/7/1956	Melayu	Male	Citizen	NO.23, JALAN KEMBOJA 4A/3, BUKIT SENTOSA	3.41933	101.595		Selangor						TABLIGH							NEGATIF				NEGATIF
hs34	hs34	50	23/9/1971	Melayu	Female	Citizen	Hospital Kuala Kubu Baru	3.56435	101.653		Selangor									DAERAH	15.03.2021	15/3/2020	17/3/2020	NEGATIF	24.3.2020	31.3.2020	NEGATIF	NEGATIF
hs340	hs340	67	1954-08-04	Melayu	Male	Citizen	NO.34, JALAN KEMBOJA 5A/2, BUKIT SENTOSA	3.41554	101.597		Selangor						TABLIGH							NEGATIF				NEGATIF
hs341	hs341	57	15/2/1964	Melayu	Male	Citizen	NO.37, JALAN KEMBOJA 4A/4, BUKIT SENTOSA	3.41958	101.594		Selangor						TABLIGH							NEGATIF				NEGATIF
hs342	hs342	62	20/7/1959	Melayu	Male	Citizen	NO.3, JALAN KEMBOJA 4A, BUKIT SENTOSA	3.41697	101.594		Selangor						TABLIGH							NEGATIF				NEGATIF
hs343	hs343	61	17/3/1960	Melayu	Male	Citizen	NO.55, JALAN KEMBOJA 4A/4, BUKIT SENTOSA	3.4196	101.594		Selangor						TABLIGH							NEGATIF				NEGATIF
hs344	hs344	54	17/1/1967	Melayu	Male	Citizen	NO.1, JALAN KEMBOJA 4A/3, BUKIT SENTOSA	3.41712	101.594		Selangor						TABLIGH							NEGATIF				NEGATIF
hs345	hs345	58	1963-11-11	Melayu	Female	Citizen	NO.60, JALAN KEMBOJA 4A/5, BUKIT SENTOSA	3.41644	101.592		Selangor						TABLIGH							NEGATIF				NEGATIF
hs346	hs346	62	29/10/1959	Melayu	Male	Citizen	NO.4, JALAN KEMBOJA 4A/10, BUKIT SENTOSA	3.41587	101.593		Selangor						TABLIGH							NEGATIF				NEGATIF
hs347	hs347	61	25/12/1959	Melayu	Male	Citizen	NO.18, JALAN KEMBOJA 4A/7, BUKIT SENTOSA	3.41545	101.594		Selangor						TABLIGH							NEGATIF				NEGATIF
hs349	hs349	54	24/11/1967	Melayu	Male	Citizen	NO.21, JALAN KEMBOJA 5A/1, BUKIT SENTOSA	3.41513	101.597		Selangor						TABLIGH							NEGATIF				NEGATIF
hs35	hs35	33	1988-02-07	Melayu	Male	Citizen	Pt 1032, Rumah 2 35900 Hulu Bernam, Selangor	3.7283	101.502		Selangor									DAERAH	15.03.2021	15/3/2020	17/3/2020	NEGATIF	24.3.2020	31.3.2020	NEGATIF	NEGATIF
hs350	hs350	54	28/7/1967	Melayu	Male	Citizen	NO.32, JALAN KEMBOJA 4A/13, BUKIT SENTOSA	3.41818	101.593		Selangor						TABLIGH							NEGATIF				NEGATIF
hs351	hs351	57	13/1/1964	Melayu	Male	Citizen	NO.21, JALAN KEMBOJA 4A/6, BUKIT SENTOSA	3.41612	101.594		Selangor						TABLIGH							NEGATIF				NEGATIF
hs352	hs352	27	1994-02-05	Melayu	Male	Citizen	Blok 1-11, Apartment Dahlia, Tbr 1, Bukit Beruntung, Hulu Selangor Selangor, Malaysia	3.43071	101.562		Selangor									DAERAH	16.5.2020	15.5.2020	18.5.2020	NEGATIF				NEGATIF
hs353	hs353	26	16/8/1995	Melayu	Male	Citizen	Blok 1-11, Apartment Dahlia, Tbr 1, Bukit Beruntung, Hulu Selangor Selangor, Malaysia	3.43071	101.562		Selangor									DAERAH	16.5.2020	15.5.2020	18.5.2020	NEGATIF				NEGATIF
hs354	hs354	4	2017-11-10	Melayu	Male	Citizen	Blok1-11, Apartment Dahlia, Tbr 1, Bukit Beruntung, Hulu Selangor Selangor, Malaysia				Selangor									DAERAH	16.5.2020	15.5.2020	16.5.2020	NEGATIF				NEGATIF
hs355	hs355	25	22/4/1996	Melayu	Female	Citizen	Blok 1-11, Apartment Dahlia, Tbr 1, Bukit Beruntung, Hulu Selangor Selangor, Malaysia	3.43071	101.562		Selangor									DAERAH	16.5.2020	15.5.2020	18.5.2020	NEGATIF				NEGATIF
hs356	hs356	2	2019-06-11	Melayu	Female	Citizen	No. 21 Jalan Telipot 1A/3 Seksyen BS9 Bukit Sentosa	3.42451	101.565		Selangor						CUCU			DAERAH	6.4.2020	31.3.2020	4.4.2020	NEGATIF				NEGATIF
hs357	hs357	62	25/8/1959	Melayu	Female	Citizen	Blok C-1-25, Apt Kenanga, Taman Bunga Raya				Selangor						SAUDARA( KENDURI DI SABAK BERNAM)			DAERAH	6.4.2020	31.3.2020	4.4.2020	NEGATIF				NEGATIF
hs358	hs358	25	13/9/1996	Melayu	Female	Citizen	No. 21 Jalan Telipot 1A/3 Seksyen BS9 Bukit Sentosa	3.42451	101.565		Selangor						MENANTU (DTG RUMAH 26/3)			DAERAH	7.4.2020	31.3.2020	4.4.2020	NEGATIF				NEGATIF
hs359	hs359	23	21/4/1998	Melayu	Female	Citizen	No. 21 Jalan Telipot 1A/3 Seksyen BS9 Bukit Sentosa	3.42451	101.565		Selangor						ANAK			DAERAH	7.4.2020	31.3.2020	4.4.2020	NEGATIF				NEGATIF
hs36	hs36	34	1986-11-12	Melayu	Male	Citizen	No. 12 Jln Songket 1E Taman Desa Bukit Bujang KKB	3.53462	101.659		Selangor									DAERAH	15.03.2021	15/3/2020	17/3/2020	NEGATIF	24.3.2020	31.3.2020	NEGATIF	NEGATIF
hs360	hs360	25	20/9/1996	Melayu	Male	Citizen	No. 21 Jalan Telipot 1A/3 Seksyen BS9 Bukit Sentosa	3.42451	101.565		Selangor						ANAK (DTG RUMAH 26/3)			DAERAH	7.4.2020	31.3.2020	13.4.2020	NEGATIF				NEGATIF
hs361	hs361	27	22/6/1994	Melayu	Female	Citizen	No.12 Lorong Gugusan Alam 7/10 Seksyen 7, Bandar Puncak Alam	3.2264	101.431		Selangor						MENANTU			DAERAH	7.4.2020	31.3.2020	4.4.2020	NEGATIF				NEGATIF
hs362	hs362	27	1994-03-09	Melayu	Male	Citizen	No. 21 Jalan Telipot 1A/3 Seksyen BS9 Bukit Sentosa	3.42451	101.565		Selangor						ANAK			DAERAH	7.4.2020	31.3.2020	4.4.2020	NEGATIF				NEGATIF
hs363	hs363	52	1968-10-12	Melayu	Male	Citizen	No. 21 Jalan Telipot 1A/3 Seksyen BS9 Bukit Sentosa	3.42451	101.565		Selangor						SUAMI			DAERAH	7.4.2020	31.3.2020	4.4.2020	NEGATIF				NEGATIF
hs364	hs364	39	1982-02-04	Melayu	Female	Citizen	L-1-67, Apt Teratai, Taman Bunga Raya				Selangor						RAKAN SEKERJA			DAERAH	7.4.2020	31.3.2020	4.4.2020	NEGATIF				NEGATIF
hs365	hs365	23	21/6/1998	Melayu	Male	Citizen	No 29 Jalan Anggerik 3a, Bukit Sentosa Rawang	3.41827	101.582		Selangor									DAERAH	7.4.2020	31.3.2020	4.4.2020	NEGATIF				NEGATIF
hs366	hs366	12	14/1/2009	India	Female	Citizen	B-1-11, Apartment Dahlia TBR, Bukit Beruntung	3.43071	101.562		Selangor									DAERAH	11.4.2020	10.4.2020	12.4.2020	NEGATIF				NEGATIF
hs367	hs367	12	2009-05-02	Melayu	Male	Citizen	G-2-2, Apartment Dahlia TBR, Bukit Beruntung	3.43071	101.562		Selangor									DAERAH	11.4.2020	10.4.2020	12.4.2020	NEGATIF				NEGATIF
hs368	hs368	23	21/6/1998	Melayu	Male	Citizen	NO. 21JLN TELIPOT 1A/3, SEKSYEN B.S 9.	3.40809	101.595		Selangor						MENANTU							NEGATIF				NEGATIF
hs369	hs369	39	25/4/1982	Melayu	Female	Citizen	NO. 62 JLN MERANTI 6A, FASA 3, BBBK	3.45679	101.655		Selangor						RAKAN SEKERJA							NEGATIF				NEGATIF
hs37	hs37	32	31/12/1988	Melayu	Male	Citizen	Hospital Kuala Kubu Baru	3.56435	101.653		Selangor									DAERAH	15.03.2021	15/3/2020	17/3/2020	NEGATIF				NEGATIF
hs370	hs370	68	22/8/1953	Melayu	Male	Citizen	NO. 6, JLN INDAH 3/4, TMN. AMPANG INDAH, 68000 AMPANG	3.14819	101.777		Selangor						AYAH TIRI (PERGI SHAH ALAM)							NEGATIF				NEGATIF
hs371	hs371	70	16/11/1951	Melayu	Female	Citizen	NO. 6, JLN INDAH 3/4, TMN. AMPANG INDAH, 68000 AMPANG	3.14819	101.777		Selangor						EMAK (PERGI SHAH ALAM)							NEGATIF				NEGATIF
hs372	hs372	42	1979-05-01	Melayu	Female	Citizen	NO. 6, JLN INDAH 3/4, TMN. AMPANG INDAH, 68000 AMPANG	3.14819	101.777		Selangor						ADIK (PERGI SHAH ALAM)							NEGATIF				NEGATIF
hs373	hs373	33	1988-08-11	Melayu	Female	Citizen	NO. 6, JLN INDAH 3/4, TMN. AMPANG INDAH, 68000 AMPANG	3.14819	101.777		Selangor						ADIK (PERGI SHAH ALAM)							NEGATIF				NEGATIF
hs374	hs374	38	26/2/1983	Melayu	Male	Citizen	NO. 16, JLN TK 5/16, TMN MAWAR, 47100 PUCHONG	3.06919	101.63		Selangor						ADIK (KENDURI KAWEN 1/3)							NEGATIF				NEGATIF
hs375	hs375	39	13/1/1982	Melayu	Female	Citizen	NO.42. JLN SS8/8A, TMN UNIVERSITI, 47300 PETALING JAYA	3.11082	101.652		Selangor						ADIK IPAR (KENDURI KAWEN 1/3)							NEGATIF				NEGATIF
hs376	hs376	52	14/6/1969	Melayu	Male	Citizen	B-G-3 PANGSAPURI SAUJANA DAMAI, JALANRAYA BARAT, 41100 KLANG	3.04146	101.442		Selangor						SAUDARA (KENDURI KAWEN 1/3)							NEGATIF				NEGATIF
hs377	hs377	39	17/1/1982	Melayu	Female	Citizen	B-G-3 PANGSAPURI SAUJANA DAMAI, JALANRAYA BARAT, 41100 KLANG	3.04146	101.442		Selangor						SAUDARA (KENDURI KAWEN 1/3)							NEGATIF				NEGATIF
hs378	hs378	18	31/5/2003	Melayu	Female	Citizen	B-G-3 PANGSAPURI SAUJANA DAMAI, JALANRAYA BARAT, 41100 KLANG	3.04146	101.442		Selangor						SAUDARA (KENDURI KAWEN 1/3)							NEGATIF				NEGATIF
hs379	hs379	16	2005-09-01	Melayu	Female	Citizen	B-G-3 PANGSAPURI SAUJANA DAMAI, JALANRAYA BARAT, 41100 KLANG	3.04146	101.442		Selangor						SAUDARA (KENDURI KAWEN 1/3)							NEGATIF				NEGATIF
hs38	hs38	29	28/12/1991	Cina	Male	Citizen	Hospital Kuala Kubu Baru	3.56435	101.653		Selangor									DAERAH	15.03.2021	15/3/2020	17/3/2020	NEGATIF				NEGATIF
hs380	hs380	11	30/6/2010	Melayu	Male	Citizen	B-G-3 PANGSAPURI SAUJANA DAMAI, JALANRAYA BARAT, 41100 KLANG	3.04146	101.442		Selangor						SAUDARA (KENDURI KAWEN 1/3)							NEGATIF				NEGATIF
hs381	hs381	9	30/9/2012	Melayu	Male	Citizen	B-G-3 PANGSAPURI SAUJANA DAMAI, JALANRAYA BARAT, 41100 KLANG	3.04146	101.442		Selangor						SAUDARA (KENDURI KAWEN 1/3)							NEGATIF				NEGATIF
hs382	hs382	50	15/3/1971	Melayu	Male	Citizen	695 LORONG COLLEGE HEIGHT 12/2, TMN COLLEGE HEIGHT 70400 SEREMBAN	2.75576	101.969		Selangor						ADIK IPAR(KENDURI KAWEN 1/3)							NEGATIF				NEGATIF
hs383	hs383	46	29/1/1975	Melayu	Female	Citizen	695 LORONG COLLEGE HEIGHT 12/2, TMN COLLEGE HEIGHT 70400 SEREMBAN	2.75576	101.969		Selangor						ADIK(KENDURI KAWEN 1/3)							NEGATIF				NEGATIF
hs384	hs384	21	2000-01-07	Melayu	Male	Citizen	695 LORONG COLLEGE HEIGHT 12/2, TMN COLLEGE HEIGHT 70400 SEREMBAN	2.75576	101.969		Selangor						ANAK SAUDARA(KENDURI KAWEN 1/3)							NEGATIF				NEGATIF
hs385	hs385	10	16/8/2011	Melayu	Male	Citizen	695 LORONG COLLEGE HEIGHT 12/2, TMN COLLEGE HEIGHT 70400 SEREMBAN	2.75576	101.969		Selangor						ANAK SAUDARA(KENDURI KAWEN 1/3)							NEGATIF				NEGATIF
hs386	hs386	10	16/8/2011	Melayu	Male	Citizen	695 LORONG COLLEGE HEIGHT 12/2, TMN COLLEGE HEIGHT 70400 SEREMBAN	2.75576	101.969		Selangor						ANAK SAUDARA(KENDURI KAWEN 1/3)							NEGATIF				NEGATIF
hs387	hs387	56	1965-02-09	Melayu	Female	Citizen	NO. 11, JLN PURNAMA 2/3, TMN PURNAMA 2, 45300 SG. BESAR.	3.66999	100.99		Selangor						SAUDARA( KENDURI DI SABAK BERNAM)							NEGATIF				NEGATIF
hs388	hs388	46	27/8/1975	Melayu	Male	Citizen	P-1-10 Apartment Dahlia Taman Bunga Raya	3.43757	101.548		Selangor									DAERAH	4.4.2020	31.3.2020	5.4.2020	NEGATIF				NEGATIF
hs389	hs389	6	2015-12-07	Melayu	Male	Citizen	P-1-10 Apartment Dahlia Taman Bunga Raya	3.43757	101.548		Selangor									DAERAH	4.4.2020	31.3.2020	5.4.2020	NEGATIF				NEGATIF
hs39	hs39	31	1990-09-10	India	Female	Citizen	Hospital Kuala Kubu Baru	3.56435	101.653		Selangor									DAERAH	15.03.2021	15/3/2020	17/3/2020	NEGATIF				NEGATIF
hs390	hs390	40	19/5/1981	Melayu	Female	Citizen	No.1, Jalan Melor 3A, Desa Melor, Serendah	3.35939	101.626		Selangor									DAERAH	8.4.2020	7.4.2020	8.4.2020	NEGATIF	15.4.2020			NEGATIF
hs391	hs391	32	1989-07-02	Melayu	Male	Citizen	No 18, Jalan Melorsari 7, Bandar Sungai Buaya	3.37451	101.533		Selangor									DAERAH	3.4.2020	31/3/2020	5.4.2020	NEGATIF				NEGATIF
hs392	hs392	6	16/10/2015	Melayu	Male	Citizen	No 18, Jalan Melorsari 7, Bandar Sungai Buaya	3.37451	101.533		Selangor									DAERAH	3.4.2020	31/3/2020	5.4.2020	NEGATIF				NEGATIF
hs393	hs393	4	29/9/2017	Melayu	Female	Citizen	No 18, Jalan Melorsari 7, Bandar Sungai Buaya	3.37451	101.533		Selangor									DAERAH	3.4.2020	31/3/2020	5.4.2020	NEGATIF				NEGATIF
hs394	hs394	32	1989-07-01	Melayu	Female	Citizen	No 6 Jln Melatisari 2b, Bandar Sg Buaya	3.37826	101.525		Selangor									DAERAH	4.4.2020	2020-01-04	7.4.2020	NEGATIF				NEGATIF
hs395	hs395	59	1962-01-04	Melayu	Female	Citizen	No 15, Jalan Rampaisari 2B, Bandar Sungai Buaya	3.378	101.527		Selangor									DAERAH	31.03.2021	31.03.2021	5.4.2020	NEGATIF				NEGATIF
hs396	hs396	37	1984-09-01	Melayu	Male	Citizen	No 15, Jalan Melorsari 7, Bandar Sungai Buaya	3.37973	101.533		Selangor									DAERAH	31.03.2021	31.03.2021	5.4.2020	NEGATIF				NEGATIF
hs397	hs397	29	22/12/1991	Melayu	Female	Citizen	No 15, Jalan Melorsari 7, Bandar Sungai Buaya	3.37973	101.533		Selangor									DAERAH	31.03.2021	31.03.2021	5.4.2020	NEGATIF				NEGATIF
hs398	hs398	8	25/8/2013	Melayu	Male	Citizen	No 15, Jalan Melorsari 7, Bandar Sungai Buaya	3.37973	101.533		Selangor									DAERAH	31.03.2021	31.03.2021	5.4.2020	NEGATIF				NEGATIF
hs399	hs399	5	2016-09-09	Melayu	Male	Citizen	No 15, Jalan Melorsari 7, Bandar Sungai Buaya	3.37973	101.533		Selangor									DAERAH	31.03.2021	31.03.2021	5.4.2020	NEGATIF				NEGATIF
hs4	hs4	17	23/1/2004	Melayu	Male	Citizen	No 49, Jalan Melor 8, Desa Melor, 48200 Serendah, Selangor	3.35774	101.631		Selangor	Serendah		SMK SERENDAH	NO		KELUARGA				9.3.2020	2020-10-03	2020-10-03	NEGATIF				NEGATIF
hs40	hs40	30	1991-11-03	Melayu	Female	Citizen	Hospital Kuala Kubu Baru	3.56435	101.653		Selangor									DAERAH	15.03.2021	15/3/2020	17/3/2020	NEGATIF				NEGATIF
hs400	hs400	2	2019-09-03	Melayu	Female	Citizen	No 15, Jalan Melorsari 7, Bandar Sungai Buaya	3.37973	101.533		Selangor									DAERAH	31.03.2021	31.03.2021	5.4.2020	NEGATIF				NEGATIF
hs401	hs401	30	23/9/1991	Melayu	Male	Citizen	No 15, Jalan Rampaisari 2B, Bandar Sungai Buaya	3.378	101.527		Selangor									DAERAH	31.03.2021	31.03.2021	5.4.2020	NEGATIF				NEGATIF
hs402	hs402	27	1994-10-01	Melayu	Male	Citizen	No 15, Jalan Rampaisari 2B, Bandar Sungai Buaya	3.378	101.527		Selangor									DAERAH	31.03.2021	31/3/2020	4.4.2020	NEGATIF				NEGATIF
hs403	hs403	34	24/4/1987	Melayu	Male	Citizen	No 15, Jalan Rampaisari 2B, Bandar Sungai Buaya	3.378	101.527		Selangor									DAERAH	31.03.2021	31/3/2020	4.4.2020	NEGATIF				NEGATIF
hs404	hs404	30	26/8/1991	Melayu	Female	Citizen	No 15, Jalan Rampaisari 2B, Bandar Sungai Buaya	3.378	101.527		Selangor									DAERAH	31.03.2021	31/3/2020	3.4.2020	NEGATIF				NEGATIF
hs405	hs405	40	19/10/1981	Melayu	Female	Citizen	No 9 Jalan Kantansari, Bandar Sg Buaya	3.3746	101.531		Selangor									DAERAH	2020-01-04	2020-01-04	7.4.2020	NEGATIF				NEGATIF
hs406	hs406	13	24/1/2008	Melayu	Female	Citizen	No 16 Jln Mawarsari 5 Bandar Baru Sg Buaya	3.37455	101.527		Selangor									DAERAH	2020-01-04	2020-01-04	7.4.2020	NEGATIF				NEGATIF
hs407	hs407	47	1974-10-11	Melayu	Female	Citizen	No 1 Jln Melursari 13 Bandar Sg Buaya	3.37973	101.533		Selangor									DAERAH	2020-01-04	2020-01-04	7.4.2020	NEGATIF				NEGATIF
hs408	hs408	34	25/12/1986	Melayu	Female	Citizen	No 6 Jln Cempakasari Bandar Sg Buaya	3.37464	101.529		Selangor									DAERAH	2020-01-04	2020-01-04	7.4.2020	NEGATIF				NEGATIF
hs409	hs409	1	2020-11-02	Melayu	Female	Citizen	No 6 Jln Cempakasari Bandar Sg Buaya	3.37464	101.529		Selangor									DAERAH	2020-01-04	2020-01-04	7.4.2020	NEGATIF				NEGATIF
hs41	hs41	31	1990-07-11	Melayu	Male	Citizen	Hospital Kuala Kubu Baru	3.56435	101.653		Selangor									DAERAH	15.03.2021	15/3/2020	17/3/2020	NEGATIF				NEGATIF
hs410	hs410	33	26/11/1988	Melayu	Female	Citizen	No 1 Jln Kasturisari 2c Bandar Sg Buaya	3.3746	101.525		Selangor									DAERAH	2020-01-04	2020-01-04	7.4.2020	NEGATIF				NEGATIF
hs411	hs411	39	1982-01-12	Melayu	Female	Citizen	No 325 Kg Sg Buaya, Bandar Sg Buaya	3.37451	101.533		Selangor									DAERAH	2020-01-04	2020-01-04	7.4.2020	NEGATIF				NEGATIF
hs412	hs412	45	22/3/1976	Melayu	Female	Citizen	No 16 Jln Mawarsari 5, Bandar Sg Buaya	3.37455	101.527		Selangor									DAERAH	2020-01-04	2020-01-04	7.4.2020	NEGATIF				NEGATIF
hs413	hs413	42	23/2/1979	Melayu	Female	Citizen	No 304 Kg Sg Buaya, Bandar Sg Buaya	3.37451	101.533		Selangor									DAERAH	2020-01-04	2020-01-04	7.4.2020	NEGATIF				NEGATIF
hs414	hs414	2	13/11/2019	Melayu	Female	Citizen	No 304 Kg Sg Buaya, Bandar Sg Buaya	3.37451	101.533		Selangor									DAERAH	2020-01-04	2020-01-04	7.4.2020	NEGATIF				NEGATIF
hs415	hs415	29	1992-12-08	Melayu	Female	Citizen	No 36 Jln Kembojasari 3, Bandar Sg Buaya	3.37931	101.535		Selangor									DAERAH	2020-01-04	2020-01-04	7.4.2020	NEGATIF				NEGATIF
hs416	hs416	34	1987-10-09	Melayu	Female	Citizen	No 19 Jln Kiambangsari 9, Bandar Sg Buaya	3.38263	101.537		Selangor									DAERAH	2020-01-04	2020-01-04	7.4.2020	NEGATIF				NEGATIF
hs417	hs417	29	20/1/1992	Melayu	Female	Citizen	No 39 Jln Melatisari 3d/2, Bandar Sg Buaya	3.37595	101.523		Selangor									DAERAH	2020-01-04	2020-01-04	7.4.2020	NEGATIF				NEGATIF
hs418	hs418	36	13/11/1985	Melayu	Female	Citizen	No 11a Jln Selasihsari 6, Bandar Sg Buaya	3.37207	101.536		Selangor									DAERAH	2020-01-04	2020-01-04	7.4.2020	NEGATIF				NEGATIF
hs419	hs419	3	2018-02-02	Melayu	Male	Citizen	No 11a, Jln Selasihsari 6, Bandar Sg Buaya	3.37207	101.536		Selangor									DAERAH	2020-01-04	2020-01-04	7.4.2020	NEGATIF				NEGATIF
hs42	hs42	30	21/8/1991	Melayu	Male	Citizen	Hospital Kuala Kubu Baru	3.56435	101.653		Selangor									DAERAH	15.03.2021	15/3/2020	17/3/2020	NEGATIF				NEGATIF
hs420	hs420	26	30/11/1995	Melayu	Female	Citizen	No 4/66 Kg Sg Buaya, Bandar Sg Buaya	3.37451	101.533		Selangor									DAERAH	2020-01-04	2020-01-04	7.4.2020	NEGATIF				NEGATIF
hs421	hs421	36	19/6/1985	Melayu	Female	Citizen	No 25 Jln Kembojasari 8, Bandar Sg Buaya	3.38187	101.535		Selangor									DAERAH	2020-01-04	2020-01-04	7.4.2020	NEGATIF				NEGATIF
hs422	hs422	2	25/4/2019	Melayu	Female	Citizen	No 25 Jln Kembojasari 8, Bandar Sg Buaya	3.38187	101.535		Selangor									DAERAH	2020-01-04	2020-01-04	7.4.2020	NEGATIF				NEGATIF
hs423	hs423	36	13/1/1985	Melayu	Female	Citizen	No 23 Jln Selasihsari 4a, Bandar Sg Buaya	3.37494	101.534		Selangor									DAERAH	2020-01-04	2020-01-04	6.4.2020	NEGATIF				NEGATIF
hs424	hs424	27	1994-04-03	Melayu	Female	Citizen	No 266 Kg Sg Buaya, Bandar Sg Buaya	3.37451	101.533		Selangor									DAERAH	2020-01-04	2020-01-04	6.4.2020	NEGATIF				NEGATIF
hs425	hs425	3	2018-12-09	Melayu	Female	Citizen	No 12a Jln Melatisari 2d, Bandar Sg Buaya	3.37939	101.526		Selangor									DAERAH	2020-01-04	2020-01-04	6.4.2020	NEGATIF				NEGATIF
hs426	hs426	34	19/7/1987	Melayu	Female	Citizen	No. 12A Jalan Melatisari 2D, Bandar Sungai Buaya	3.37939	101.526		Selangor									DAERAH	2020-01-04	1.4.2020	6.4.2020	NEGATIF				NEGATIF
hs427	hs427	2	16/10/2019	Melayu	Male	Citizen	No. 9, Jalan Selasihsari 3, Bandar Sungai Buaya	3.37287	101.536		Selangor									DAERAH	2020-01-04	1.4.2020	6.4.2020	NEGATIF				NEGATIF
hs428	hs428	36	22/6/1985	Melayu	Female	Citizen	No. 9, Jalan Selasihsari 3, Bandar Sungai Buaya	3.37287	101.536		Selangor									DAERAH	2020-01-04	1.4.2020	6.4.2020	NEGATIF				NEGATIF
hs429	hs429	2	2019-12-09	Melayu	Male	Citizen	No. 15 Jalan Lawangsari 1, Bandar Sungai Buaya	3.37279	101.537		Selangor									DAERAH	2020-01-04	1.4.2020	3.4.2020	NEGATIF				NEGATIF
hs43	hs43	37	21/4/1984	Melayu	Male	Citizen	Hospital Kuala Kubu Baru	3.56435	101.653		Selangor									DAERAH	15.03.2021	15/3/2020	17/3/2020	NEGATIF				NEGATIF
hs430	hs430	31	1990-06-08	Melayu	Female	Citizen	No. 15 Jalan Lawangsari 1, Bandar Sungai Buaya	3.37279	101.537		Selangor									DAERAH	2020-01-04	1.4.2020	3.4.2020	NEGATIF				NEGATIF
hs431	hs431	1	15/1/2020	Melayu	Female	Citizen	No. 38 Jalan Melatisari 3E, Bandar Sungai Buaya	3.37688	101.523		Selangor									DAERAH	2020-01-04	1.4.2020	3.4.2020	NEGATIF				NEGATIF
hs432	hs432	33	23/9/1988	Melayu	Female	Citizen	No. 38 Jalan Melatisari 3E, Bandar Sungai Buaya	3.37688	101.523		Selangor									DAERAH	2020-01-04	1.4.2020	3.4.2020	NEGATIF				NEGATIF
hs433	hs433	1	2020-09-01	Melayu	Male	Citizen	No. 23 Jalan Selasih 4A, Bandar Sungai Buaya	3.37451	101.533		Selangor									DAERAH	2020-01-04	1.4.2020	3.4.2020	NEGATIF				NEGATIF
hs434	hs434	31	29/3/1990	Melayu	Male	Citizen	No. 15, Jalan LawangSari 1, Bandar Sungai Buaya	3.37279	101.537		Selangor									DAERAH	2020-01-04	1.4.2020	3.4.2020	NEGATIF				NEGATIF
hs435	hs435	12	27/12/2008	Melayu	Female	Citizen	No. 23 Jalan Selasihsari 4A Bandar Sungai Buaya	3.37494	101.534		Selangor									DAERAH	2020-01-04	1.4.2020	3.4.2020	NEGATIF				NEGATIF
hs436	hs436	6	23/6/2015	Melayu	Male	Citizen	No. 15 Jalan Lawangsari 1, Bandar Sungai Buaya	3.37279	101.537		Selangor									DAERAH	2020-01-04	1.4.2020	3.4.2020	NEGATIF				NEGATIF
hs437	hs437	2	15/10/2019	Melayu	Female	Citizen	281, Kg Sungai Buaya Rawang	3.37292	101.528		Selangor									DAERAH	2020-01-04	1.4.2020	7.4.2020	NEGATIF				NEGATIF
hs438	hs438	63	29/7/1958	Melayu	Female	Citizen	15, Jalan Kenanga Sari 3C Bandar	3.1818	101.753		Selangor									DAERAH	2020-01-04	1.4.2020	7.4.2020	NEGATIF				NEGATIF
hs439	hs439	34	17/12/1986	Melayu	Female	Citizen	281, Kg Sungai Buaya Rawang	3.37292	101.528		Selangor									DAERAH	2020-01-04	1.4.2020	7.4.2020	NEGATIF				NEGATIF
hs44	hs44	44	22/4/1977	Melayu	Male	Citizen	Hospital Kuala Kubu Baru	3.56435	101.653		Selangor									DAERAH	15.03.2021	15/3/2020	17/3/2020	NEGATIF				NEGATIF
hs440	hs440	54	1967-01-01	Melayu	Female	Citizen	NO 11, JALAN SRI MELOR 6, TAMAN SRI MELOR, SEKSYEN 7, 43650 BANDAR BARU BANGI, SELANGOR	2.97105	101.784		Selangor													NEGATIF				NEGATIF
hs441	hs441	25	1996-01-04	Melayu	Female	Citizen	NO 11, JALAN SRI MELOR 6, TAMAN SRI MELOR, SEKSYEN 7, 43650 BANDAR BARU BANGI, SELANGOR	2.97105	101.784		Selangor													NEGATIF				NEGATIF
hs442	hs442	17	17/3/2004	Melayu	Female	Citizen	NO 11, JALAN SRI MELOR 6, TAMAN SRI MELOR, SEKSYEN 7, 43650 BANDAR BARU BANGI, SELANGOR	2.97105	101.784		Selangor													NEGATIF				NEGATIF
hs443	hs443	17	17/8/2004	Melayu	Female	Citizen	No.65, Jalan Anggerik 3B/5, Bukit Sentosa	3.41699	101.584		Selangor									DAERAH	7.4.2020	3.4.2020	13.4.2020	NEGATIF				NEGATIF
hs444	hs444	47	1974-12-10	Melayu	Female	Citizen	No.1, Jalan Keruing 1D, Taman Keruing, Rasa	3.49994	101.628		Selangor									DAERAH	7.4.2020	3.4.2020	13.4.2020	NEGATIF				NEGATIF
hs445	hs445	38	1983-11-06	Melayu	Female	Citizen	No.1, Jalan Tanjung 2, Bukit Sentosa	3.40011	101.564		Selangor									DAERAH	7.4.2020	3.4.2020	12.4.2020	NEGATIF				NEGATIF
hs446	hs446	17	17/1/2004	Melayu	Male	Citizen	No.25, Jalan Anggerik 4C, Sek BS 7, Bukit Sentosa	3.41897	101.59		Selangor									DAERAH	7.4.2020	3.4.2020	13.4.2020	NEGATIF				NEGATIF
hs447	hs447	16	24/12/2004	Melayu	Female	Citizen	No.1, Jalan Seroja 5A/1, Bukit Sentosa	3.41118	101.582		Selangor									DAERAH	7.4.2020	3.4.2020	13.4.2020	NEGATIF				NEGATIF
hs448	hs448	17	25/8/2004	Melayu	Female	Citizen	No.28, Jalan Kemboja 4C, Bukit Sentosa	3.41202	101.594		Selangor									DAERAH	7.4.2020	3.4.2020	12.4.2020	NEGATIF				NEGATIF
hs449	hs449	17	15/4/2004	Melayu	Female	Citizen	No.55, Jalan Kemboja 4A/1, Bukit Sentosa	3.41712	101.594		Selangor									DAERAH	7.4.2020	3.4.2020	13.4.2020	NEGATIF				NEGATIF
hs45	hs45	44	1977-09-11	Melayu	Female	Citizen	Hospital Kuala Kubu Baru	3.56435	101.653		Selangor									DAERAH	15.03.2021	15/3/2020	17/3/2020	NEGATIF	23.3.2020	28.3.2020	NEGATIF	NEGATIF
hs450	hs450	17	29/8/2004	Melayu	Male	Citizen	No.17, jalan Anggerik 4B, Bukit Sentosa	3.41899	101.59		Selangor									DAERAH	7.4.2020	3.4.2020	13.4.2020	NEGATIF				NEGATIF
hs451	hs451	16	31/12/2004	Melayu	Female	Citizen	No.24, Jalan Anggerik 3C, Taman Anggerik , Bukit Sentosa	3.41787	101.585		Selangor									DAERAH	7.4.2020	3.4.2020	13.4.2020	NEGATIF				NEGATIF
hs452	hs452	17	2004-07-01	Melayu	Male	Citizen	No.35, Jalan Kemboja 5A/2, Bukit Sentosa	3.41578	101.597		Selangor									DAERAH	7.4.2020	3.4.2020	13.4.2020	NEGATIF				NEGATIF
hs453	hs453	50	1971-01-01	Melayu	Male	Citizen	No.40, Jalan Bakawlai 2A/5, Bukit Sentosa	3.40926	101.599		Selangor									DAERAH	7.4.2020	3.4.2020	13.4.2020	NEGATIF				NEGATIF
hs454	hs454	17	27/6/2004	Melayu	Female	Citizen	No.31, Jalan Kemboja 4B/6, Bukit Sentosa	3.4132	101.596		Selangor									DAERAH	7.4.2020	3.4.2020	13.4.2020	NEGATIF				NEGATIF
hs455	hs455	17	2004-08-03	Melayu	Female	Citizen	No.24, Jalan Telipot 1A/3, Bukit Sentosa	3.40803	101.596		Selangor									DAERAH	7.4.2020	3.4.2020	13.4.2020	NEGATIF				NEGATIF
hs456	hs456	17	20/10/2004	Melayu	Male	Citizen	No.9, Jalan Widuri 2F/2, Bukit Sentosa	3.43547	101.592		Selangor									DAERAH	7.4.2020	3.4.2020	13.4.2020	NEGATIF				NEGATIF
hs457	hs457	17	2004-06-03	Melayu	Female	Citizen	No.23, Jalan Widuri 1, Bukit Beruntung	3.43205	101.589		Selangor									DAERAH	7.4.2020	3.4.2020	13.4.2020	NEGATIF				NEGATIF
hs458	hs458	17	23/8/2004	Melayu	Female	Citizen	No.26, Jalan Seroja 6D/1, Bukit Sentosa	3.40809	101.577		Selangor									DAERAH	7.4.2020	3.4.2020	13.4.2020	NEGATIF				NEGATIF
hs459	hs459	17	2004-08-09	Melayu	Male	Citizen	No.22, Jalan Kemboja 4A/13, Bukit Sentosa	3.41785	101.593		Selangor									DAERAH	7.4.2020	3.4.2020	13.4.2020	NEGATIF				NEGATIF
hs46	hs46	45	23/4/1976	Melayu	Male	Citizen	Hospital Kuala Kubu Baru	3.56435	101.653		Selangor									DAERAH	15.03.2021	15/3/2020	17/3/2020	NEGATIF				NEGATIF
hs460	hs460	17	2004-03-07	Melayu	Female	Citizen	No.16, Jalan Anggerik 1A/9, Bukit Sentosa	3.43041	101.568		Selangor									DAERAH	7.4.2020	3.4.2020	13.4.2020	NEGATIF				NEGATIF
hs461	hs461	17	13/7/2004	Melayu	Male	Citizen	No.10, Jalan Kesumba 3B/4, Bukit Beruntung	3.43279	101.594		Selangor									DAERAH	7.4.2020	3.4.2020	13.4.2020	NEGATIF				NEGATIF
hs462	hs462	17	21/8/2004	Melayu	Female	Citizen	No.36, Jalan Seroja 6A/1, Bukit Sentosa	3.41013	101.581		Selangor									DAERAH	7.4.2020	3.4.2020	13.4.2020	NEGATIF				NEGATIF
hs463	hs463	51	1970-12-02	Melayu	Female	Citizen	No.29, JALAN Melursari , Bandar Sg Buaya	3.37973	101.533		Selangor									DAERAH	7.4.2020	3.4.2020	13.4.2020	NEGATIF				NEGATIF
hs464	hs464	55	16/8/1966	Melayu	Female	Citizen	No.43, Jalan Telipot 2B/1, Sek BS9, Bukit Sentosa	3.40825	101.594		Selangor									DAERAH	7.4.2020	3.4.2020	12.4.2020	NEGATIF				NEGATIF
hs465	hs465	45	24/9/1976	Melayu	Female	Citizen	No.59, Jalan Telipot 1A/8, Bukit Sentosa	3.40809	101.595		Selangor									DAERAH	7.4.2020	3.4.2020	12.4.2020	NEGATIF				NEGATIF
hs466	hs466	17	26/11/2004	Melayu	Female	Citizen	No. 23, Jalan Kemboja 4A/5 Seksyen 8	3.41654	101.593		Selangor									DAERAH	7.4.2020	6.4.2020	8.4.2020	NEGATIF				NEGATIF
hs467	hs467	17	25/5/2004	Melayu	Male	Citizen	No. 77, Jalan Bakawali 26, BS10, Bukit Sentosa 3, 48300	3.40758	101.603		Selangor									DAERAH	7.4.2020	6.4.2020	8.4.2020	NEGATIF				NEGATIF
hs468	hs468	17	23/2/2004	Melayu	Female	Citizen	27, JALAN BAKAWALI 2C/10 BS 10	3.40828	101.602		Selangor													NEGATIF				NEGATIF
hs469	hs469	17	2004-08-09	Melayu	Male	Citizen	22 JLN KEMBOJA 4A/13 SEKSYEN BS8	3.41785	101.593		Selangor													NEGATIF				NEGATIF
hs47	hs47	38	29/3/1983	Melayu	Female	Citizen	Hospital Kuala Kubu Baru	3.56435	101.653		Selangor									DAERAH	16.03.2021	16/3/2020	16/3/2020	NEGATIF				NEGATIF
hs470	hs470	17	20/9/2004	Melayu	Male	Citizen	NO 18 JLN ANGGERIK 1A/2 BUKIT SENTOSA 7	3.41871	101.578		Selangor													NEGATIF				NEGATIF
hs471	hs471	17	13/5/2004	Melayu	Female	Citizen	NO: 31, JALAN BAKAWALI 2B, BUKIT SENTOSA	3.40797	101.6		Selangor													NEGATIF				NEGATIF
hs472	hs472	44	16/1/1977	Melayu	Female	Citizen	NO 25, TMN TANJUNG 3B, SEK BB7, BUKIT BERUNTUNG 1656, KG NARA, PASIR PUTEH, KELANTAN	3.41926	101.567		Selangor													NEGATIF				NEGATIF
hs473	hs473	38	14/5/1983	Melayu	Female	Citizen	NO 8, JALAN MAWAR 2, TAMAN MAWAR, BUKIT BERUNTUNG 2 2503, KG SEBERANG BAROH TALI AIR, 21000 KUALA TERENGGANU	3.42439	101.557		Selangor													NEGATIF				NEGATIF
hs474	hs474	37	1984-01-12	Melayu	Female	Citizen	15, JALAN ADENIUM 5B/1, SEKSYEN BB5	3.42322	101.551		Selangor													NEGATIF				NEGATIF
hs475	hs475	35	24/1/1986	Melayu	Female	Citizen	NO 57, JALAN ANGGERIK 3D/5, TAMAN ANGGERIK 3, BS7 6/4840, KG SC, BATU 4 1/2, JLN KUANTAN- GAMBANG, 25150 KUANTAN	3.41971	101.588		Selangor													NEGATIF				NEGATIF
hs476	hs476	29	24/10/1992	Melayu	Female	Citizen	NO.17, JLN SEROJA 3A, BUKIT SENTOSA NO. 4-12-8, VISTA ANGKASA, 59200 BUKIT KERINCHI, KUALA LUMPUR	3.41517	101.582		Selangor													NEGATIF				NEGATIF
hs477	hs477	29	1992-06-08	Melayu	Male	Citizen	No.81, Kampung Pasir Puteh, Kalumpang	3.63729	101.573		Selangor									DAERAH	7.4.2020	3.4.2020	7.4.2020	NEGATIF				NEGATIF
hs478	hs478	31	24/8/1990	Melayu	Female	Citizen	No.81, Kampung Pasir Puteh, Kalumpang	3.63729	101.573		Selangor									DAERAH	7.4.2020	3.4.2020	7.4.2020	NEGATIF				NEGATIF
hs479	hs479	26	1995-02-08	Melayu	Male	Citizen	No.81, Kampung Pasir Puteh, Kalumpang	3.63729	101.573		Selangor									DAERAH	7.4.2020	3.4.2020	7.4.2020	NEGATIF				NEGATIF
hs48	hs48	29	17/8/1992	Melayu	Female	Citizen	Hospital Kuala Kubu Baru	3.56435	101.653		Selangor									DAERAH	15.03.2021	15/3/2020	17/3/2020	NEGATIF				NEGATIF
hs480	hs480	23	1998-11-01	Melayu	Female	Citizen	No.81, Kampung Pasir Puteh, Kalumpang	3.63729	101.573		Selangor									DAERAH	7.4.2020	3.4.2020	7.4.2020	NEGATIF				NEGATIF
hs481	hs481	58	29/4/1963	Melayu	Female	Citizen	No.81, Kampung Pasir Puteh, Kalumpang	3.63729	101.573		Selangor									DAERAH	7.4.2020	3.4.2020	8.4.2020	NEGATIF				NEGATIF
hs482	hs482	9	30/12/2011	Melayu	Male	Citizen	No.81, Kampung Pasir Puteh, Kalumpang	3.63729	101.573		Selangor									DAERAH	7.4.2020	3.4.2020	7.4.2020	NEGATIF				NEGATIF
hs483	hs483	14	23/12/2006	Melayu	Female	Citizen	No.9, Jalan Besar Desa Kasih, Kampung Pasir Puteh, Kalumpang	3.63845	101.573		Selangor									DAERAH	8.4.2020	6.4.2020	8.4.2020	NEGATIF				NEGATIF
hs484	hs484	3	23/3/2018	Melayu	Female	Citizen	No.41, Kampung Pasir Puteh, Kalumpang	3.63804	101.573		Selangor									DAERAH	8.4.2020	6.4.2020	8.4.2020	NEGATIF				NEGATIF
hs485	hs485	21	20/2/2000	Melayu	Male	Citizen	No.81, Kampung Pasir Puteh, Kalumpang	3.63729	101.573		Selangor									DAERAH	8.4.2020	6.4.2020	8.4.2020	NEGATIF				NEGATIF
hs486	hs486	15	17/9/2006	Melayu	Male	Citizen	No.81, Kampung Pasir Puteh, Kalumpang	3.63729	101.573		Selangor									DAERAH	8.4.2020	6.4.2020	8.4.2020	NEGATIF				NEGATIF
hs487	hs487	20	20/7/2001	Melayu	Male	Citizen	No.81, Kampung Pasir Puteh, Kalumpang	3.63729	101.573		Selangor									DAERAH	8.4.2020	6.4.2020	8.4.2020	NEGATIF				NEGATIF
hs488	hs488	47	28/3/1974	Melayu	Female	Citizen	No.81, Kampung Pasir Puteh, Kalumpang	3.63729	101.573		Selangor									DAERAH	8.4.2020	6.4.2020	8.4.2020	NEGATIF				NEGATIF
hs489	hs489	50	1971-05-09	Melayu	Male	Citizen	No.81, Kampung Pasir Puteh, Kalumpang	3.63729	101.573		Selangor									DAERAH	8.4.2020	6.4.2020	8.4.2020	NEGATIF				NEGATIF
hs49	hs49	39	1982-10-10	Melayu	Female	Citizen	Hospital Kuala Kubu Baru	3.56435	101.653		Selangor									DAERAH	15.03.2021	15/3/2020	17/3/2020	NEGATIF				NEGATIF
hs490	hs490	27	1994-10-02	Melayu	Male	Citizen	No.9, Jalan Besar Desa Kasih, Kampung Pasir Puteh, Kalumpang	3.63845	101.573		Selangor									DAERAH	8.4.2020	6.4.2020	8.4.2020	NEGATIF				NEGATIF
hs491	hs491	88	18/2/1933	Melayu	Female	Citizen	No.9, Jalan Besar Desa Kasih, Kampung Pasir Puteh, Kalumpang	3.63845	101.573		Selangor									DAERAH	8.4.2020	6.4.2020	8.4.2020	NEGATIF				NEGATIF
hs492	hs492	51	18/6/1970	Melayu	Male	Citizen	No.81, Kampung Pasir Puteh, Kalumpang	3.63729	101.573		Selangor									DAERAH	8.4.2020	6.4.2020	8.4.2020	NEGATIF				NEGATIF
hs493	hs493	46	1975-06-08	Melayu	Female	Citizen	No.9, Jalan Besar Desa Kasih, Kampung Pasir Puteh, Kalumpang	3.63845	101.573		Selangor									DAERAH	8.4.2020	6.4.2020	8.4.2020	NEGATIF				NEGATIF
hs494	hs494	23	1998-03-12	Melayu	Female	Citizen	No.81, Kampung Pasir Puteh, Kalumpang	3.63729	101.573		Selangor									DAERAH	8.4.2020	6.4.2020	8.4.2020	NEGATIF				NEGATIF
hs495	hs495	17	26/11/2004	Melayu	Female	Citizen	No.9, Jalan Besar Desa Kasih, Kampung Pasir Puteh, Kalumpang	3.63845	101.573		Selangor									DAERAH	8.4.2020	6.4.2020	8.4.2020	NEGATIF				NEGATIF
hs496	hs496	44	16/4/1977	Melayu	Female	Citizen	No.81, Kampung Pasir Puteh, Kalumpang	3.63729	101.573		Selangor									DAERAH	8.4.2020	6.4.2020	8.4.2020	NEGATIF				NEGATIF
hs497	hs497	34	21/12/1986	Melayu	Female	Citizen	No.41, Kampung Pasir Puteh, Kalumpang	3.63804	101.573		Selangor									DAERAH	8.4.2020	6.4.2020	8.4.2020	NEGATIF				NEGATIF
hs498	hs498	17	20/9/2004	Melayu	Male	Citizen	No.81, Kampung Pasir Puteh, Kalumpang	3.63729	101.573		Selangor									DAERAH	8.4.2020	6.4.2020	8.4.2020	NEGATIF				NEGATIF
hs499	hs499	38	18/2/1983	Melayu	Female	Citizen	I-1-07, Apartment Sri Inai, Bukit Sentosa				Selangor									DAERAH	8.4.2020	7.4.200	9.4.2020	NEGATIF				NEGATIF
hs5	hs5	19	31/12/2001	Melayu	Female	Citizen	NO 49, JALAN MELOR 8, DESA MELOR, 48200 SERENDAH, SELANGOR	3.35774	101.631		Selangor			UIA GAMBANG, KUANTAN, PAHANG (MATRIKULASI)	NO									NEGATIF				NEGATIF
hs50	hs50	39	28/7/1982	Melayu	Female	Citizen	Hospital Kuala Kubu Baru	3.56435	101.653		Selangor									DAERAH	15.03.2021	15/3/2020	17/3/2020	NEGATIF				NEGATIF
hs500	hs500	52	23/8/1969	Melayu	Female	Citizen	G-3-01, Apartment Kenanga TBR, Bukit Beruntung	3.42439	101.557		Selangor									DAERAH	8.4.2020	7.4.200	9.4.2020	NEGATIF				NEGATIF
hs501	hs501	45	27/5/1976	Melayu	Female	Citizen	No.21, Jalan Bakawali 2C/4, Bukit Sentosa	3.40778	101.605		Selangor									DAERAH	8.4.2020	7.4.200	9.4.2020	NEGATIF				NEGATIF
hs502	hs502	54	1967-01-06	Melayu	Female	Citizen	E-2-17, Apartment Kenanga TBR, Bukit Beruntung	3.44077	101.552		Selangor									DAERAH	8.4.2020	7.4.200	9.4.2020	NEGATIF				NEGATIF
hs503	hs503	42	23/7/1979	Melayu	Female	Citizen	K-1-38, Apartment Teratai TBR, Bukit Beruntung	3.44452	101.554		Selangor									DAERAH	8.4.2020	7.4.200	9.4.2020	NEGATIF				NEGATIF
hs504	hs504	22	25/1/1999	Melayu	Male	Citizen	J-2-6, Apartment Cempaka TBR, Bukit Beruntung	3.43794	101.548		Selangor									DAERAH	8.4.2020	7.4.200	9.4.2020	NEGATIF				NEGATIF
hs505	hs505	40	1981-01-02	Melayu	Female	Citizen	No.19, Jalan Cemperasari 1C, Bdr Sg Buaya	3.37451	101.533		Selangor									DAERAH	8.4.2020	7.4.200	9.4.2020	NEGATIF				NEGATIF
hs506	hs506	35	30/6/1986	Melayu	Female	Citizen	No.11, Jalan Tanjung 3A, Taman Tanjung, Bukit Beruntung	3.41996	101.568		Selangor									DAERAH	8.4.2020	7.4.200	9.4.2020	NEGATIF				NEGATIF
hs507	hs507	10	2011-08-08	Melayu	Male	Citizen	N-G-28, Apartment Dahlia TBR, Bukit Beruntung	3.42439	101.557		Selangor									DAERAH	9.4.2020	8.4.2020	10.4.2020	NEGATIF				NEGATIF
hs508	hs508	10	2011-06-08	Melayu	Male	Citizen	B-4-19, Apartment Anggerik TBR, Bukit Beruntung	3.44619	101.548		Selangor									DAERAH	9.4.2020	8.4.2020	10.4.2020	NEGATIF				NEGATIF
hs509	hs509	10	27/4/2011	Melayu	Female	Citizen	D-1-33, Apartment Kemuning TBR, Bukit Beruntung	3.44477	101.553		Selangor									DAERAH	9.4.2020	8.4.2020	10.4.2020	NEGATIF				NEGATIF
hs51	hs51	36	20/12/1984	Melayu	Female	Citizen	Hospital Kuala Kubu Baru	3.56435	101.653		Selangor									DAERAH	15.03.2021	15/3/2020	17/3/2020	NEGATIF				NEGATIF
hs510	hs510	10	18/4/2011	Melayu	Female	Citizen	B-1-37, Apartment Dahlia TBR, Bukit Beruntung				Selangor									DAERAH	9.4.2020	8.4.2020	10.4.2020	NEGATIF				NEGATIF
hs511	hs511	10	23/7/2011	Melayu	Male	Citizen	L-4-15, Apartment Anggerik TBR, Bukit Beruntung	3.44619	101.548		Selangor									DAERAH	9.4.2020	8.4.2020	10.4.2020	NEGATIF				NEGATIF
hs512	hs512	10	25/9/2011	Melayu	Male	Citizen	Rumah Tunas Harapan, No.7, Jalan Kekwa 2, Bukit Beruntung	3.43121	101.556		Selangor									DAERAH	9.4.2020	8.4.2020	10.4.2020	NEGATIF				NEGATIF
hs513	hs513	10	24/11/2011	Melayu	Male	Citizen	H-1-1, Apartment Anggerik TBR, Bukit Beruntung	3.44636	101.547		Selangor									DAERAH	9.4.2020	8.4.2020	10.4.2020	NEGATIF				NEGATIF
hs514	hs514	12	28/3/2009	Melayu	Female	Citizen	K-1-20, Apartment Dahlia TBR, Bukit Beruntung				Selangor									DAERAH	10.4.2020	9.4.2020	11.4.2020	NEGATIF				NEGATIF
hs515	hs515	9	26/12/2011	Melayu	Female	Citizen	C-2-25, Apartment Anggerik TBR, Bukit Beruntung	3.44619	101.548		Selangor									DAERAH	10.4.2020	9.4.2020	11.4.2020	NEGATIF				NEGATIF
hs516	hs516	10	13/6/2011	Melayu	Male	Citizen	B-3-53A, Apartment Teratai TBR, Bukit Beruntung	3.44452	101.554		Selangor									DAERAH	10.4.2020	9.4.2020	11.4.2020	NEGATIF				NEGATIF
hs517	hs517	13	2008-09-02	Melayu	Male	Citizen	E-2-12, Apartment Kenanga TBR, Bukit Beruntung	3.44077	101.552		Selangor									DAERAH	10.4.2020	9.4.2020	11.4.2020	NEGATIF				NEGATIF
hs518	hs518	10	25/4/2011	Melayu	Female	Citizen	B-2-2 Apartment Mawar Taman Bunga Raya Bukit Beruntung 48300 Rawang	3.40132	101.561		Selangor									DAERAH	6.4.2020	1.4.2020	7.4.2020	NEGATIF				NEGATIF
hs519	hs519	10	25/7/2011	Melayu	Female	Citizen	Q2-12 Apartment Dahlia Taman Bunga Raya Bukit Beruntung 48300 Rawang	3.43757	101.548		Selangor									DAERAH	6.4.2020	1.4.2020	7.4.2020	NEGATIF				NEGATIF
hs52	hs52	31	1990-02-09	Melayu	Male	Citizen	G403 Kuarters Hospital HKKB 44000	3.56423	101.653		Selangor									DAERAH	15.03.2021	15/3/2020	17/3/2020	NEGATIF	24.3.2020	31.3.2020	NEGATIF	NEGATIF
hs520	hs520	10	2011-06-03	Melayu	Female	Citizen	E-G-32 Apartment Dahlia Taman Bunga Raya Bukit Beruntung 48300 Rawang	3.43757	101.548		Selangor									DAERAH	6.4.2020	1.4.2020	6.4.2020	NEGATIF				NEGATIF
hs521	hs521	10	15/4/2011	Melayu	Female	Citizen	F-G-10 Apartment Dahlia Taman Bunga Raya Bukit Beruntung 48300 Rawang	3.43757	101.548		Selangor									DAERAH	6.4.2020	1.4.2020	6.4.2020	NEGATIF				NEGATIF
hs522	hs522	10	21/5/2011	Melayu	Male	Citizen	B-2-18 Apartment Cempaka Taman Bunga Raya Bukit Beruntung 48300 Rawang	3.43794	101.548		Selangor									DAERAH	6.4.2020	1.4.2020	6.4.2020	NEGATIF				NEGATIF
hs523	hs523	10	31/8/2011	Melayu	Male	Citizen	Blok C-2-3a Jalan Bunga Raya 1 Apartment Cempaka Taman Bunga Raya Bukit Beruntung 48300 Rawang	3.43794	101.548		Selangor									DAERAH	6.4.2020	1.4.2020	6.4.2020	NEGATIF				NEGATIF
hs524	hs524	10	23/6/2011	Melayu	Male	Citizen	B-4-6 Apt Kenanga Tmn Bunga Raya Bukit Beruntung 48300 Rawang	3.43873	101.546		Selangor									DAERAH	6.4.2020	1.4.2020	4.4.2020	NEGATIF				NEGATIF
hs525	hs525	10	26/3/2011	Melayu	Male	Citizen	D-G-27 Blok D Apartment Dahlia Taman Bunga Raya Bukit Beruntung 48300 Rawang	3.43757	101.548		Selangor									DAERAH	6.4.2020	1.4.2020	6.4.2020	NEGATIF				NEGATIF
hs526	hs526	10	23/5/2011	Melayu	Male	Citizen	No 51 Jalan Inai 3 Bukit Beruntung 48300 Rawang	3.43098	101.56		Selangor									DAERAH	6.4.2020	1.4.2020	4.4.2020	NEGATIF				NEGATIF
hs527	hs527	10	23/2/2011	Melayu	Female	Citizen	P 202 Apartment Dahlia Taman Bunga Raya Bukit Beruntung 48300 Rawang	3.43757	101.548		Selangor									DAERAH	6.4.2020	1.4.2020	7.4.2020	NEGATIF				NEGATIF
hs528	hs528	10	27/9/2011	Melayu	Female	Citizen	Blok M-Lg-07 Apartment Dahlia Taman Bunga Raya, Bukit Beruntung 48300 Rawang	3.43757	101.548		Selangor									DAERAH	6.4.2020	1.4.2020	6.4.2020	NEGATIF				NEGATIF
hs529	hs529	10	2011-08-05	Melayu	Female	Citizen	26, Jalan Anggerik 1b, Seksyen Bb4 Bukit Beruntung 48300 Rawang	3.42429	101.565		Selangor									DAERAH	6.4.2020	1.4.2020	7.4.2020	NEGATIF				NEGATIF
hs53	hs53	37	15/3/1984	Melayu	Female	Citizen	Lot 1445, Lorong Permai 1, 44300 Batang Kali, Hulu Selangor, Selangor	3.46507	101.659		Selangor									DAERAH	16.03.2021	16/3/2020	18/3/2020	NEGATIF				NEGATIF
hs530	hs530	10	22/2/2011	Melayu	Female	Citizen	N-1-10, Apt Dahlia, Taman Bunga Raya Bkt Beruntung 48300 Rawang	3.43799	101.551		Selangor									DAERAH	6.4.2020	1.4.2020	4.4.2020	NEGATIF				NEGATIF
hs531	hs531	10	2011-11-08	Melayu	Female	Citizen	R-1-06 Apartment Dahlia Jalan Bunga Raya 1 Bukit Beruntung 48300 Rawang	3.43757	101.548		Selangor									DAERAH	6.4.2020	1.4.2020	7.4.2020	NEGATIF				NEGATIF
hs532	hs532	10	2011-01-03	Melayu	Female	Citizen	Bg20 Blok B, Apartmen Dahlia Taman Bunga Raya Bukit Beruntung 48300 Rawang	3.43757	101.548		Selangor									DAERAH	6.4.2020	1.4.2020	7.4.2020	NEGATIF				NEGATIF
hs533	hs533	10	20/11/2011	Melayu	Female	Citizen	P-1-06, Apartment Dahlia, Jln Bunga Raya 1, Tmn Bunga Raya 48300 Rawang	3.43757	101.548		Selangor									DAERAH	6.4.2020	1.4.2020	2.4.2020	NEGATIF				NEGATIF
hs534	hs534	10	2011-03-04	Melayu	Female	Citizen	D_1- 21, Apt Kenanga Tmn Bunya Raya, Bkt Beruntung 48300 Rawang	3.43799	101.551		Selangor									DAERAH	6.4.2020	1.4.2020	6.4.2020	NEGATIF				NEGATIF
hs535	hs535	10	18/2/2011	Melayu	Female	Citizen	Blok E-1-03a Apt Dahlia Taman Bunga Raya 48300 Rawang	3.43757	101.548		Selangor									DAERAH	6.4.2020	1.4.2020	4.4.2020	NEGATIF				NEGATIF
hs536	hs536	10	2011-08-06	Melayu	Female	Citizen	J-G-06 Apt Dahlia Taman Bunga Raya Bukit Beruntung 48300 Rawang	3.43799	101.551		Selangor									DAERAH	6.4.2020	1.4.2020	7.4.2020	NEGATIF				NEGATIF
hs537	hs537	10	2011-11-05	Melayu	Female	Citizen	M-Lg-10, Blok M, Apt Dahlia Jln Bunga Raya 1. Tmn Bunga Raya Bkt. Beruntung. 48300 Rawang	3.43757	101.548		Selangor									DAERAH	6.4.2020	1.4.2020	4.4.2020	NEGATIF				NEGATIF
hs538	hs538	10	2011-02-06	Melayu	Female	Citizen	Blok F-1-16 Apartment Mawar Taman Bunga Raya Bukit Beruntung 48000 Rawang	3.40132	101.561		Selangor									DAERAH	6.4.2020	1.4.2020	2.4.2020	NEGATIF				NEGATIF
hs539	hs539	10	25/3/2011	Melayu	Female	Citizen	N-1-7 Apt Kenanga, Taman Bunga Raya Bukit Beruntung 48300 Rawang	3.43799	101.551		Selangor									DAERAH	6.4.2020	1.4.2020	2.4.2020	NEGATIF				NEGATIF
hs54	hs54	35	1986-07-04	Melayu	Male	Citizen	No 7, Jalan Mahaoni 2a/2 Tamu Hill Park, 44300 Batang Kali, Selangor	3.45763	101.668		Selangor									DAERAH	16.03.2021	16/3/2020	18/3/2020	NEGATIF				NEGATIF
hs540	hs540	10	18/2/2011	Melayu	Female	Citizen	J-G-60 Jalan Bunga Raya 3 Apt Teratai Taman Bunga Raya Bukit Beruntung 48300 Rawang	3.43799	101.551		Selangor									DAERAH	6.4.2020	1.4.2020	7.4.2020	NEGATIF				NEGATIF
hs542	hs542	10	2011-10-01	Melayu	Female	Citizen	L-G-03a, Apt Dahlia Taman Bunga Raya Bukit Beruntung 48300 Rawang	3.43757	101.548		Selangor									DAERAH	6.4.2020	1.4.2020	4.4.2020	NEGATIF				NEGATIF
hs543	hs543	10	2011-03-10	Melayu	Female	Citizen	M 215 Apt Anggerik Taman Bunga Raya 1 Bukit Beruntung 48300 Rawang	3.40132	101.561		Selangor									DAERAH	6.4.2020	1.4.2020	7.4.2020	NEGATIF				NEGATIF
hs544	hs544	10	16/4/2011	Melayu	Female	Citizen	H-3-10 Apartment Cempaka Jalan Bunga Raya Taman Bunga Raya,Bukit Beruntung 48300 Rawang	3.43794	101.548		Selangor									DAERAH	6.4.2020	1.4.2020	2.4.2020	NEGATIF				NEGATIF
hs545	hs545	10	2011-12-01	Melayu	Male	Citizen	No 4 Jalan Inai 7 Bukit Beruntung 48300 Rawang	3.42946	101.56		Selangor									DAERAH	6.4.2020	1.4.2020	6.4.2020	NEGATIF				NEGATIF
hs546	hs546	10	22/4/2011	Melayu	Female	Citizen	E-2-3 Apartment Mawar Jalan Taman Bunga Raya 2 Bukit Beruntung 48300 Rawang	3.40132	101.561		Selangor									DAERAH	6.4.2020	1.4.2020	6.4.2020	NEGATIF				NEGATIF
hs547	hs547	10	26/7/2011	Melayu	Male	Citizen	F-1-25 Apt Dahlia Taman Bunga Raya Bukit Beruntung 48300 Rawang	3.43757	101.548		Selangor									DAERAH	6.4.2020	1.4.2020	7.4.2020	NEGATIF				NEGATIF
hs548	hs548	10	19/6/2011	Melayu	Male	Citizen	D-3-10 Apt Kenanga Taman Bunga Raya Bukit Beruntung 48300 Rawang	3.43799	101.551		Selangor									DAERAH	6.4.2020	1.4.2020	7.4.2020	NEGATIF				NEGATIF
hs549	hs549	10	17/10/2011	Melayu	Female	Citizen	Q-2-11 APT DAHLIA JALAN BUNGA RAYA 1 TAMAN BUNGA RAYA BUKIT BERUNTUNG 48300 RAWANG	3.43757	101.548		Selangor	132632208								SRATBR1	6.4.2020			NEGATIF				NEGATIF
hs55	hs55	35	29/5/1986	Melayu	Female	Citizen	No 46, Jalan Mahagoni 2c/4 Tamu Hill, 44300 Batang Kali, Selangor	3.45763	101.668		Selangor									DAERAH	16.03.2021	16/3/2020	18/3/2020	NEGATIF				NEGATIF
hs550	hs550	10	2011-03-06	Melayu	Male	Citizen	B-2-2 APARTMENT MAWAR TAMAN BUNGA RAYA BUKIT BERUNTUNG 48300 RAWANG	3.40132	101.561		Selangor	133806685								SRATBR1	6.4.2020			NEGATIF				NEGATIF
hs551	hs551	10	19/11/2011	Melayu	Male	Citizen	E-G-32 APARTMENT DAHLIA TAMAN BUNGA RAYA BUKIT BERUNTUNG 48300 RAWANG	3.43757	101.548		Selangor	165260377									6.4.2020			NEGATIF				NEGATIF
hs552	hs552	10	25/11/2011	Melayu	Female	Citizen	L-2-06 Apt Dahlia Taman Bunga Raya Bukit Beruntung 48300 Rawang	3.43799	101.551		Selangor									DAERAH	6.4.2020	1.4.2020	4.4.2020	NEGATIF				NEGATIF
hs553	hs553	10	26/7/2011	Melayu	Male	Citizen	F-G-10 APARTMENT DAHLIA TAMAN BUNGA RAYA BUKIT BERUNTUNG 48300 RAWANG	3.43757	101.548		Selangor													NEGATIF				NEGATIF
hs554	hs554	47	22/4/1974	Melayu	Female	Citizen	P-G-12, APARTMENT DAHLIA TAMAN BUNGA RAYA	3.43757	101.548		Selangor													NEGATIF				NEGATIF
hs555	hs555	35	1986-02-04	Melayu	Female	Citizen	NO. 55, JALAN KASTURI 4C, BUKIT BERUNTUNG	3.40547	101.574		Selangor													NEGATIF				NEGATIF
hs556	hs556	41	20/7/1980	Melayu	Female	Citizen	NO 36, JALAN SEMARAK 3C, BUKIT BERUNTUNG	3.41263	101.566		Selangor													NEGATIF				NEGATIF
hs557	hs557	41	22/5/1980	Melayu	Female	Citizen	No,8 Jalan Semarak 2b, Bukit Beruntung,48300 Rawang Selangor	3.41662	101.566		Selangor									DAERAH	6.4.2020	1.4.2020	6.4.2020	NEGATIF				NEGATIF
hs558	hs558	55	1966-09-09	Melayu	Female	Citizen	No.55, Jalan Telipot 3A/3, Bukit Beruntung	3.40724	101.597		Selangor									DAERAH	8.4.2020	7.4.2020	8.4.2020	NEGATIF				NEGATIF
hs559	hs559	46	1975-02-11	Melayu	Female	Citizen	No.13, Jalan Semarak 2B/1, Bukit Beruntung	3.41647	101.566		Selangor									DAERAH	8.4.2020	7.4.2020	9.4.2020	NEGATIF				NEGATIF
hs56	hs56	36	30/5/1985	Melayu	Female	Citizen	G12-01-01 Kompleks Perumahan Ibu Pejabat Polis Daerah Gombak, Jalan Bukit Idaman, 68100 Batu Caves, Selangor	3.25209	101.641		Selangor									DAERAH	16.03.2021	16/3/2020	18/3/2020	NEGATIF				NEGATIF
hs560	hs560	33	17/10/1988	Melayu	Female	Citizen	No.25, Jalan Kemboja 3, Bukit Beruntung	3.43281	101.569		Selangor									DAERAH	8.4.2020	7.4.2020	9.4.2020	NEGATIF				NEGATIF
hs561	hs561	4	2017-05-08	Melayu	Male	Citizen	No.25, Jalan Kemboja 3, Bukit Beruntung	3.43281	101.569		Selangor									DAERAH	8.4.2020	7.4.2020	8.4.2020	NEGATIF				NEGATIF
hs562	hs562	42	23/5/1979	Melayu	Female	Citizen	No.27, Jalan Kemboja 3, Serendah	3.43285	101.569		Selangor									DAERAH	8.4.2020	7.4.2020	8.4.2020	NEGATIF				NEGATIF
hs563	hs563	52	1969-03-11	Melayu	Female	Citizen	No.38, Jalan Widuri 2E/1, Serendah	3.43515	101.594		Selangor									DAERAH	8.4.2020	7.4.2020	8.4.2020	NEGATIF				NEGATIF
hs564	hs564	4	19/3/2017	Melayu	Female	Citizen	No.27, Jalan Kemboja 3, Serendah	3.43285	101.569		Selangor									DAERAH	8.4.2020	7.4.2020	8.4.2020	NEGATIF				NEGATIF
hs565	hs565	6	24/2/2015	Melayu	Female	Citizen	No.27, Jalan Kemboja 3, Serendah	3.43285	101.569		Selangor									DAERAH	8.4.2020	7.4.2020	8.4.2020	NEGATIF				NEGATIF
hs566	hs566	34	1987-02-07	Melayu	Female	Citizen	D-2-11, Apartment Mawar, Taman Bunga Raya, Bukit Beruntung	3.43799	101.551		Selangor									DAERAH	8.4.2020	7.4.2020	8.4.2020	NEGATIF				NEGATIF
hs567	hs567	58	29/7/1963	Melayu	Female	Citizen	No.23, Jalan Jejarum 6, Serendah	3.40453	101.571		Selangor									DAERAH	8.4.2020	7.4.2020	8.4.2020	NEGATIF				NEGATIF
hs568	hs568	60	1961-01-01	Melayu	Female	Citizen	No.43, Jalan Jejarum 6, Serendah	3.40443	101.572		Selangor									DAERAH	8.4.2020	7.4.2020	8.4.2020	NEGATIF				NEGATIF
hs569	hs569	27	22/4/1994	Melayu	Female	Citizen	J-3-8 Apartment Seri Seroja 7A, Bukit Beruntung	3.4217	101.572		Selangor									DAERAH	8.4.2020	7.4.2020	8.4.2020	NEGATIF				NEGATIF
hs57	hs57	34	1987-11-09	Melayu	Female	Citizen	3g, Lorong D/M 7, Taman Desa Minang, 68100 Batu Caves, Selangor	3.23869	101.706		Selangor									DAERAH	16.03.2021	17/3/2020	19.3.2020	NEGATIF				NEGATIF
hs570	hs570	51	23/3/1970	Melayu	Female	Citizen	No.3, Jalan Anggerik 2E/2, Prima Beruntung	3.40669	101.54		Selangor									DAERAH	8.4.2020	7.4.2020	8.4.2020	NEGATIF				NEGATIF
hs571	hs571	46	1975-01-01	Melayu	Female	Citizen	J-3-11 Apt Cempaka Taman Bunga Raya Bukit Beruntung 48300 Rawang	3.43939	101.55		Selangor									DAERAH	8.4.2020	7.4.2020	9.4.2020	NEGATIF				NEGATIF
hs572	hs572	33	18/6/1988	Melayu	Female	Citizen	No.22, Jalan Semarak 2C, Bukit Sentosa	3.41612	101.566		Selangor									DAERAH	8.4.2020	7.4.2020	9.4.2020	NEGATIF				NEGATIF
hs573	hs573	47	1974-01-01	Melayu	Female	Citizen	H-G-10, Apartment Kenanga TBR, Bukit Beruntung	3.43873	101.546		Selangor									DAERAH	8.4.2020	7.4.2020	9.4.2020	NEGATIF				NEGATIF
hs574	hs574	15	26/9/2006	Melayu	Female	Citizen	No.55, Jalan Jejarum 6, Bukit Beruntung	3.40452	101.572		Selangor									DAERAH	8.4.2020	7.4.2020	9.4.2020	NEGATIF				NEGATIF
hs575	hs575	17	26/10/2004	Melayu	Female	Citizen	No.55, Jalan Jejarum 6, Bukit Beruntung	3.40452	101.572		Selangor									DAERAH	8.4.2020	7.4.2020	9.4.2020	NEGATIF				NEGATIF
hs576	hs576	44	21/2/1977	Melayu	Female	Citizen	No.55, Jalan Jejarum 6, Bukit Beruntung	3.40452	101.572		Selangor									DAERAH	8.4.2020	7.4.2020	9.4.2020	NEGATIF				NEGATIF
hs577	hs577	42	17/5/1979	Melayu	Female	Citizen	B-2-2, Apartment Cempaka TBR, Bukit Beruntung	3.43794	101.548		Selangor									DAERAH	8.4.2020	7.4.2020	8.4.2020	NEGATIF				NEGATIF
hs578	hs578	18	19/10/2003	Melayu	Female	Citizen	B-2-2, Apartment Cempaka TBR, Bukit Beruntung	3.43794	101.548		Selangor									DAERAH	8.4.2020	7.4.2020	9.4.2020	NEGATIF				NEGATIF
hs579	hs579	39	30/1/1982	Melayu	Female	Citizen	F-3A-8, Apartment Kemuning TBR, Bukit Beruntung	3.44477	101.553		Selangor									DAERAH	8.4.2020	7.4.2020	8.4.2020	NEGATIF				NEGATIF
hs58	hs58	36	1985-02-04	Melayu	Male	Citizen	No 33a, Jalan Sebarau 3, Taman Desa Sebarau, Ulu Yam Bhrau, 44300 Batang Kali, Selangor	3.44684	101.64		Selangor									DAERAH	16.03.2021	16/3/2020	18/3/2020	NEGATIF				NEGATIF
hs580	hs580	36	23/9/1985	Melayu	Female	Citizen	No.12, Jalan Anggerik 1A/2, Bukit Beruntung	3.42451	101.565		Selangor									DAERAH	8.4.2020	7.4.2020	8.4.2020	NEGATIF				NEGATIF
hs581	hs581	39	1982-08-05	Melayu	Female	Citizen	No.56, Jalan Semarak 2B, Bukit Beruntung	3.41508	101.566		Selangor									DAERAH	8.4.2020	7.4.2020	8.4.2020	NEGATIF				NEGATIF
hs582	hs582	27	13/1/1994	Melayu	Female	Citizen	No.25, Jalan Anggerik 1A, Bukit Setosa	3.43058	101.568		Selangor									DAERAH	8.4.2020	7.4.2020	8.4.2020	NEGATIF				NEGATIF
hs583	hs583	56	24/7/1965	Melayu	Female	Citizen	No.42, Jalan Semarak 2B, Bukit Beruntung	3.41548	101.566		Selangor									DAERAH	8.4.2020	7.4.2020	8.4.2020	NEGATIF				NEGATIF
hs584	hs584	26	26/10/1995	Melayu	Female	Citizen	24, Jalan Adenium 5B	3.42264	101.552		Selangor									DAERAH	7.4.2020	6.4.2020	8.4.2020	NEGATIF				NEGATIF
hs585	hs585	19	2002-06-05	Melayu	Female	Citizen	1, Jalan Jenjarum 2C, Bukit Sentosa	3.40766	101.562		Selangor									DAERAH	7.4.2020	6.4.2020	8.4.2020	NEGATIF				NEGATIF
hs586	hs586	19	22/1/2002	Melayu	Female	Citizen	C-1-17, Apt Anggerik, Bukit Beruntung	3.40132	101.561		Selangor									DAERAH	7.4.2020	6.4.2020	8.4.2020	NEGATIF				NEGATIF
hs587	hs587	14	20/11/2007	Melayu	Male	Citizen	No.15, Jalan Tanjung 3, Bukit Beruntung 7	3.41997	101.567		Selangor				NO		SEKOLAH			DAERAH	8.4.2020	7.4.200	9.4.2020	NEGATIF				NEGATIF
hs588	hs588	34	13/10/1987	Melayu	Female	Citizen	No.11, Jalan Bintang 7, Taman Desa Rening Jaya, Rasa	3.51479	101.646		Selangor				NO		SEKOLAH			DAERAH	8.4.2020	7.4.200	9.4.2020	NEGATIF				NEGATIF
hs589	hs589	14	2007-05-07	India	Female	Citizen	No.3, Jalan Telipot 2E, Bukit Sentosa	3.40813	101.595		Selangor				NO		SEKOLAH			DAERAH	8.4.2020	7.4.200	9.4.2020	NEGATIF				NEGATIF
hs59	hs59	35	1986-07-08	Melayu	Male	Citizen	Blok C, Kuarters Klinik Kesihatan Ulu Yam Bharu	3.43485	101.656		Selangor									DAERAH	16.03.2021	16/3/2020	18/3/2020	NEGATIF				NEGATIF
hs590	hs590	14	28/4/2007	Melayu	Female	Citizen	No.10, Jalan Anggerik 4D/3, Bukit Sentosa	3.41671	101.59		Selangor				NO		SEKOLAH			DAERAH	8.4.2020	7.4.200	9.4.2020	NEGATIF				NEGATIF
hs591	hs591	38	17/11/1983	Melayu	Female	Citizen	N-1-16, Apartment Kenanga TBR, Bukit Beruntung	3.44077	101.552		Selangor				NO		SEKOLAH			DAERAH	8.4.2020	7.4.200	9.4.2020	NEGATIF				NEGATIF
hs592	hs592	14	15/6/2007	Melayu	Female	Citizen	No.29, Jalan Telipot 3A/2, Bukit Sentosa	3.40805	101.595		Selangor				NO		SEKOLAH			DAERAH	9.4.2020	8.4.2020	10.4.2020	NEGATIF				NEGATIF
hs593	hs593	14	14/11/2007	Melayu	Female	Citizen	No.11, Jalan Kemboja 4A/8, Bukit Sentosa	3.41514	101.594		Selangor				NO		SEKOLAH			DAERAH	9.4.2020	8.4.2020	10.4.2020	NEGATIF				NEGATIF
hs594	hs594	14	2007-05-12	Melayu	Male	Citizen	No.11, Jalan Kemboja 4A/14, Bukit Sentosa	3.41767	101.592		Selangor				NO		SEKOLAH			DAERAH	9.4.2020	8.4.2020	10.4.2020	NEGATIF				NEGATIF
hs595	hs595	14	2007-01-02	India	Female	Citizen	No.23, Jalan Widuri 2E, Bukit Beruntung	3.43405	101.593		Selangor				NO		SEKOLAH			DAERAH	9.4.2020	8.4.2020	10.4.2020	NEGATIF				NEGATIF
hs596	hs596	14	13/5/2007	Melayu	Male	Citizen	No.9, Jalan Kesumba 3A/1, Bukit Beruntung	3.42971	101.596		Selangor				NO		SEKOLAH			DAERAH	9.4.2020	8.4.2020	10.4.2020	NEGATIF				NEGATIF
hs597	hs597	14	2007-12-09	Melayu	Female	Citizen	No.17, Jalan Kemboja 4A/4	3.41699	101.594		Selangor				NO		SEKOLAH			DAERAH	9.4.2020	8.4.2020	10.4.2020	NEGATIF				NEGATIF
hs598	hs598	14	2007-01-12	Melayu	Male	Citizen	No.3, Jalan Anggerik 5D/1, Bukit Sentosa	3.41315	101.59		Selangor				NO		SEKOLAH			DAERAH	9.4.2020	8.4.2020	10.4.2020	NEGATIF				NEGATIF
hs599	hs599	14	23/7/2007	Melayu	Male	Citizen	B-1-12, Apartment Sri Anggerik 3, Bukit Sentosa	3.41105	101.59		Selangor				NO		SEKOLAH			DAERAH	9.4.2020	8.4.2020	10.4.2020	NEGATIF				NEGATIF
hs6	hs6	20	2001-10-01	Melayu	Female	Citizen	NO 20, JALAN SRI PUTRA 3/Q, BANDAR SERI PUTRA, KAJANG, SELANGOR	2.8808	101.785		Selangor			UIA GAMBANG, KUANTAN, PAHANG (MATRIKULASI)	NO									NEGATIF				NEGATIF
hs60	hs60	37	13/10/1984	Melayu	Male	Citizen	No 17, Jalan Mahagoni 3c/3, Tamu Hill Park, Batang Kali, Selangor	3.45763	101.668		Selangor									DAERAH	16.03.2021	16/3/2020	18/3/2020	NEGATIF				NEGATIF
hs600	hs600	14	30/1/2007	Melayu	Male	Citizen	No.32, Jalan Kemboja 4C/4, Bukit Sentosa	3.40992	101.594		Selangor				NO		SEKOLAH			DAERAH	9.4.2020	8.4.2020	10.4.2020	NEGATIF				NEGATIF
hs601	hs601	14	20/8/2007	Melayu	Female	Citizen	No.11, Jalan Anggerik 3C/2, Bukit Sentosa	3.41683	101.585		Selangor				NO		SEKOLAH			DAERAH	9.4.2020	8.4.2020	10.4.2020	NEGATIF				NEGATIF
hs602	hs602	14	18/11/2007	Melayu	Female	Citizen	No.48, Jalan Anggerik 3D/4, Bukit Sentosa	3.41996	101.587		Selangor				NO		SEKOLAH			DAERAH	9.4.2020	8.4.2020	10.4.2020	NEGATIF				NEGATIF
hs603	hs603	53	1968-09-01	Melayu	Female	Citizen	NO.48, Jalan Kesumba 3A/6, Bukit Beruntung	3.42895	101.596		Selangor				NO		SEKOLAH			DAERAH	9.4.2020	8.4.2020	10.4.2020	NEGATIF				NEGATIF
hs604	hs604	13	15/12/2007	Melayu	Female	Citizen	No.3, Jalan Bakawali 2C, Bukit Sentosa	3.40723	101.604		Selangor				NO		SEKOLAH			DAERAH	9.4.2020	8.4.2020	10.4.2020	NEGATIF				NEGATIF
hs605	hs605	14	2007-11-10	India	Male	Citizen	No.68, Jalan Seroja 5A/3, Bukit Sentosa	3.41365	101.582		Selangor				NO		SEKOLAH			DAERAH	9.4.2020	8.4.2020	10.4.2020	NEGATIF				NEGATIF
hs606	hs606	14	17/9/2007	Melayu	Female	Citizen	No.2, Jalan Anggerik 4D/1	3.41617	101.591		Selangor				NO		SEKOLAH			DAERAH	9.4.2020	8.4.2020	10.4.2020	NEGATIF				NEGATIF
hs607	hs607	14	2007-05-11	Melayu	Female	Citizen	No.71, Jalan Bakawali 2C/2, Bukit Sentosa	3.40799	101.602		Selangor				NO		SEKOLAH			DAERAH	9.4.2020	8.4.2020	10.4.2020	NEGATIF				NEGATIF
hs608	hs608	14	15/1/2007	Melayu	Male	Citizen	No.8, Jalan Kesumba 3B, Bukit Beruntung	3.42891	101.595		Selangor				NO		SEKOLAH			DAERAH	9.4.2020	8.4.2020	10.4.2020	NEGATIF				NEGATIF
hs609	hs609	14	15/7/2007	Melayu	Male	Citizen	No.17, Jalan Kemboja 4A/8, Bukit Sentosa	3.41514	101.594		Selangor				NO		SEKOLAH			DAERAH	9.4.2020	8.4.2020	10.4.2020	NEGATIF				NEGATIF
hs61	hs61	38	22/9/1983	Melayu	Male	Citizen	No 5, Batu 4 3/4, Jalan Ulu Rening 44300 Batng Kali, Selangor	3.48304	101.692		Selangor									DAERAH	16.03.2021	16/3/2020	18/3/2020	NEGATIF				NEGATIF
hs610	hs610	14	18/3/2007	Melayu	Male	Citizen	No.5, Jalan Widuri 2F, Bukit Beruntung	3.43533	101.593		Selangor				NO		SEKOLAH			DAERAH	9.4.2020	8.4.2020	10.4.2020	NEGATIF				NEGATIF
hs611	hs611	14	2007-04-02	Melayu	Male	Citizen	No.27, Jalan Telipot 1A/8, Bukit Sentosa	3.40809	101.595		Selangor				NO		SEKOLAH			DAERAH	9.4.2020	8.4.2020	10.4.2020	NEGATIF				NEGATIF
hs612	hs612	14	13/3/2007	Melayu	Female	Citizen	No.1, Jalan Telipot 3A/5, Bukit Sentosa	3.40628	101.598		Selangor				NO		SEKOLAH			DAERAH	9.4.2020	8.4.2020	10.4.2020	NEGATIF				NEGATIF
hs613	hs613	14	29/4/2007	Melayu	Female	Citizen	No.39, Jalan Kemboja 4A/4, Bukit Sentosa	3.41699	101.593		Selangor				NO		SEKOLAH			DAERAH	9.4.2020	8.4.2020	10.4.2020	NEGATIF				NEGATIF
hs614	hs614	14	22/7/2007	Melayu	Female	Citizen	No.1, Jalan Kemboja 4C/4	3.41017	101.595		Selangor				NO		SEKOLAH			DAERAH	9.4.2020	8.4.2020	10.4.2020	NEGATIF				NEGATIF
hs615	hs615	14	2007-03-08	Melayu	Female	Citizen	No.2, Jalan Widuri 3C/2, Taman Widuri Sek BB18, Bukit Beruntung	3.43388	101.586		Selangor				NO		SEKOLAH			DAERAH	10.4.2020	9.4.2020	11.4.2020	NEGATIF				NEGATIF
hs616	hs616	14	16/10/2007	Melayu	Female	Citizen	H-1-13, Apartment Sri Anggerik 3, Jalan Anggerik 5, Bukit Sentosa	3.41105	101.59		Selangor				NO		SEKOLAH			DAERAH	10.4.2020	9.4.2020	11.4.2020	NEGATIF				NEGATIF
hs617	hs617	14	2007-03-07	Bumiputera	Male	Citizen	No.51, Jalan Anggerik 3A/11, Bukit Sentosa	3.4187	101.582		Selangor				NO		SEKOLAH			DAERAH	10.4.2020	9.4.2020	11.4.2020	NEGATIF				NEGATIF
hs618	hs618	15	24/3/2006	Melayu	Female	Citizen	No.33, Jalan Telipot 1A/3, Bukit Sentosa	3.40809	101.595		Selangor				NO		SEKOLAH			DAERAH	11.4.2020	10.4.2020	12.4.2020	NEGATIF				NEGATIF
hs619	hs619	15	14/6/2006	Melayu	Male	Citizen	No.15, Jalan Kemboja 5A/5, Bukit Sentosa	3.41671	101.597		Selangor				NO		SEKOLAH			DAERAH	11.4.2020	10.4.2020	12.4.2020	NEGATIF				NEGATIF
hs62	hs62	34	18/5/1987	Melayu	Male	Citizen	No 5, Jalan Adenium 5b/2, Seksyen Bb5, Bukit Beruntung	3.42278	101.551		Selangor									DAERAH	19.03.2021	19/3/2020	21.3.2020	NEGATIF				NEGATIF
hs620	hs620	14	2007-07-09	Melayu	Male	Citizen	No.22, Jalan Kemboja 4C/11, Bukit Sentosa	3.40982	101.593		Selangor				NO		SEKOLAH			DAERAH	11.4.2020	10.4.2020	12.4.2020	NEGATIF				NEGATIF
hs621	hs621	14	2007-04-12	Melayu	Male	Citizen	No.20, Jalan Kemboja 4C/8, Bukit Sentosa	3.41141	101.593		Selangor				NO		SEKOLAH			DAERAH	11.4.2020	10.4.2020	12.4.2020	NEGATIF				NEGATIF
hs622	hs622	15	21/2/2006	Melayu	Male	Citizen	No.28, Jalan Kemboja 4A/2, Bukit Sentosa	3.41852	101.595		Selangor				NO		SEKOLAH			DAERAH	11.4.2020	10.4.2020	12.4.2020	NEGATIF				NEGATIF
hs623	hs623	14	14/2/2007	Melayu	Male	Citizen	No.25, Jalan Kemboja 4B/6, Bukit Sentosa	3.4132	101.596		Selangor				NO		SEKOLAH			DAERAH	11.4.2020	10.4.2020	12.4.2020	NEGATIF				NEGATIF
hs624	hs624	15	23/6/2006	Melayu	Male	Citizen	No.27, Jalan Kemboja 4B, Bukit Sentosa	3.41282	101.598		Selangor				NO		SEKOLAH			DAERAH	11.4.2020	10.4.2020	12.4.2020	NEGATIF				NEGATIF
hs625	hs625	14	14/8/2007	Melayu	Female	Citizen	No.29, Jalan Kemboja 4C/5, Bukit Sentosa	3.40972	101.594		Selangor				NO		SEKOLAH			DAERAH	11.4.2020	10.4.2020	12.4.2020	NEGATIF				NEGATIF
hs626	hs626	15	2006-09-09	India	Female	Citizen	No.3, Jalan Kemboja 4A/19, Bukit Sentosa	3.41698	101.593		Selangor				NO		SEKOLAH			DAERAH	11.4.2020	10.4.2020	12.4.2020	NEGATIF				NEGATIF
hs627	hs627	30	24/5/1991	Melayu	Male	Citizen	H-2-07, Apartment Seri Inai, Jalan Anggerik 3, Bukit Sentosa	3.42083	101.583		Selangor				NO		SEKOLAH			DAERAH	11.4.2020	10.4.2020	12.4.2020	NEGATIF				NEGATIF
hs628	hs628	14	21/1/2007	Melayu	Female	Citizen	No.63, Jalan Kemboja 4C, Bukit Sentosa	3.41193	101.593		Selangor				NO		SEKOLAH			DAERAH	11.4.2020	10.4.2020	12.4.2020	NEGATIF				NEGATIF
hs629	hs629	12	30/10/2009	Melayu	Female	Citizen	No.11, Jalan Kemboja 4A/14, Bukit Sentosa	3.41767	101.592		Selangor				NO		SEKOLAH			DAERAH	11.4.2020	10.4.2020	12.4.2020	NEGATIF				NEGATIF
hs63	hs63	74	21/4/1947	Cina	Male	Citizen					Selangor									DAERAH	2020-06-03			NEGATIF				NEGATIF
hs630	hs630	15	21/1/2006	Melayu	Female	Citizen	No.11, Jalan Kemboja 4A/14, Bukit Sentosa	3.41767	101.592		Selangor				NO		SEKOLAH			DAERAH	11.4.2020	10.4.2020	12.4.2020	NEGATIF				NEGATIF
hs631	hs631	14	13/12/2006	Melayu	Male	Citizen	NP 48, Jalan Kemboja Bukit Sentosa	3.41202	101.594		Selangor				NO		SEKOLAH			DAERAH	11.4.2020	10.4.2020	12.4.2020	NEGATIF				NEGATIF
hs632	hs632	14	23/10/2007	Melayu	Female	Citizen	NO. 53 JALAN 3A/2, TAMAN KESUMBA, SEK BB 20 NO.10, TMN IRAMA, JELEBU, NEGERI SEMBILAN	2.94107	102.072		Selangor				NO		SEKOLAH							NEGATIF				NEGATIF
hs633	hs633	14	2007-07-03	Melayu	Female	Citizen	NO 6, JALAN ANGGERIK 3A/2 SEKSYEN BS 7 ,BUKIT SENTOSA A137, TMN LNKP, PERAMUJAYA, PEKAN, PAHANG	3.41834	101.581		Selangor				NO		SEKOLAH							NEGATIF				NEGATIF
hs634	hs634	14	14/2/2007	Melayu	Male	Citizen	NO 4 JLN KEMBOJA 4A/2 KG TAMBAK TENGAH, PANTAI REMIS, JERAM, KUALA SELANGOR	3.23712	101.308		Selangor				NO		SEKOLAH							NEGATIF				NEGATIF
hs635	hs635	14	2007-01-10	Melayu	Male	Citizen	67 JALAN BAKAWALI 2C/2, SEKSYEN BS 10, 48300 RAWANG 124, KG BUKIT PUTERA, 21450, SETIU, TERENGGANU	3.40793	101.602		Selangor				NO		SEKOLAH							NEGATIF				NEGATIF
hs636	hs636	14	2007-01-10	Melayu	Male	Citizen	67 JALAN BAKAWALI 2C/2, SEKSYEN BS 10, 48300 RAWANG 124, KG BUKIT PUTERA, 21450, SETIU, TERENGGANU	3.40793	101.602		Selangor				NO		SEKOLAH							NEGATIF				NEGATIF
hs637	hs637	14	27/2/2007	Melayu	Female	Citizen	NO 41, JLN SEROJA 5B, SEKSYEN BS 6, BUKIT SENTOSA 2 NO. 51A, KG BARU TEPI LAUT, 06150 AYER HITAM, KEDAH	6.24001	100.217		Selangor				NO		SEKOLAH							NEGATIF				NEGATIF
hs638	hs638	14	18/7/2007	Melayu	Female	Citizen	NO 23 JALAN BAKAWALI 2C/3 BUKIT SENTOSA 3	3.40808	101.603		Selangor				NO		SEKOLAH							NEGATIF				NEGATIF
hs639	hs639	14	15/6/2007	India	Female	Citizen	29 JALAN TELIPOT 3A/2 SEKSYEN BS9	3.40762	101.596		Selangor				NO		SEKOLAH							NEGATIF				NEGATIF
hs64	hs64	69	14/7/1952	Melayu	Male	Citizen	Pt 214 Jalan Kejora 211/2,Kg Melayu Rasa Tambahan	3.50124	101.636		Selangor									TABLIGH	24.3.2020	17/3/2020	19/3/2020	NEGATIF				NEGATIF
hs640	hs640	34	1987-02-10	Melayu	Female	Citizen	NO 72, JLN WIDURI 2E/1, TAMAN WIDURI,48300 BKT BERUNTUNG LOT 1597, KAW. PERPINDAHAN TOK ADIS FASA 3, K. IBAI, KT	3.43449	101.593		Selangor				NO		SEKOLAH							NEGATIF				NEGATIF
hs641	hs641	36	24/12/1984	Melayu	Female	Citizen	NO 8, JLN ADENIUM 6A/2, SEKSYEN BB5, 48300 BKT BERUNTUNG 166, JLN SERI PANDAN 3, TMN SERI PANDAN, SIKAMAT, SEREMBAN	3.42182	101.554		Selangor													NEGATIF				NEGATIF
hs642	hs642	38	18/11/1983	Melayu	Female	Citizen	NO 9, JLN ADENIUM 6A/1, SEKSYEN BB5, 48300 BKT BERUNTUNG 7166-E, KG MENGABANG TELONG, BATU RAKIT, 21020 KT	3.41731	101.557		Selangor													NEGATIF				NEGATIF
hs643	hs643	25	17/6/1996	Melayu	Female	Citizen	LOT 275, KG. CHENGAL BATU, 16800 PASIR PUTIH, KLTN	5.8208	102.379		Selangor													NEGATIF				NEGATIF
hs644	hs644	35	1986-04-04	Melayu	Female	Citizen	NO 13, JLN SEMARAK 2A/1, SEKSYEN BB7, 48300 BKT BERUNTUNG	3.41637	101.568		Selangor													NEGATIF				NEGATIF
hs645	hs645	58	24/5/1963	Melayu	Male	Citizen	No.4, Jalan Gapi 1B/10, Antara Gapi, Serendah	3.42557	101.635		Selangor									TABLIGH	17.4.2020	16.4.2020	17.4.2020	NEGATIF				NEGATIF
hs646	hs646	52	1969-11-02	Melayu	Female	Citizen	No 17, Jalan Damar 2, Taman Rasa Indah, 44200 Rasa, Selangor	3.4986	101.637		Selangor						RAKAN SEKERJA			DAERAH	8.4.2020	6.4.2020	8.4.2020	NEGATIF				NEGATIF
hs647	hs647	56	20/6/1965	Melayu	Male	Citizen	D3, Kuarters IKBN Peretak, 44000 Kuala Kubu Bharu, Selangor	3.54726	101.678		Selangor									DAERAH	8.4.2020	6.4.2020	8.4.2020	NEGATIF				NEGATIF
hs648	hs648	46	13/8/1975	Melayu	Female	Citizen	G2, Kuarters IKBN Peretak, 44000 Kuala Kubu Bharu, Selangor	3.54726	101.678		Selangor									DAERAH	8.4.2020	6.4.2020	8.4.2020	NEGATIF				NEGATIF
hs649	hs649	31	16/6/1990	Melayu	Male	Citizen	E2, Kuarters IKBN Peretak, 44000 Kuala Kubu Bharu, Selangor	3.54726	101.678		Selangor									DAERAH	8.4.2020	6.4.2020	8.4.2020	NEGATIF				NEGATIF
hs65	hs65	54	1967-10-10	Melayu	Male	Citizen	No.43 Jalan Widuri 1a,Seksyen Bb10 Bdr Bukit Beruntung	3.43243	101.59		Selangor									DAERAH	11.03.2021	17/3/2020	19/3/2020	NEGATIF				NEGATIF
hs650	hs650	46	1975-07-03	Melayu	Female	Citizen	C1, Kuarters IKBN Peretak, 44000 Kuala Kubu Bharu, Selangor	3.54726	101.678		Selangor									DAERAH	8.4.2020	6.4.2020	8.4.2020	NEGATIF				NEGATIF
hs651	hs651	32	14/1/1989	Melayu	Female	Citizen	G8, Kuarters IKBN Pertak, 44000 Kuala Kubu Bharu, Selangor	3.54726	101.678		Selangor									DAERAH	8.4.2020	6.4.2020	8.4.2020	NEGATIF				NEGATIF
hs652	hs652	60	1961-01-07	Melayu	Female	Citizen	No. 30, Jalan Tanjak 1B/1 Taman Tanjak, 44000 Kuala Kubu Bharu, Selangor	3.54501	101.661		Selangor									DAERAH	8.4.2020	6.4.2020	8.4.2020	NEGATIF				NEGATIF
hs653	hs653	41	22/2/1980	Melayu	Male	Citizen	No. 11A, Jalan 4 Taman Golf, 44000 Kuala Kubu Bharu, Selangor	3.56364	101.663		Selangor									DAERAH	8.4.2020	6.4.2020	8.4.2020	NEGATIF				NEGATIF
hs654	hs654	41	26/8/1980	Melayu	Female	Citizen	D3, Kuarters IKBN Peretak, 44000 Kuala Kubu Bharu, Selangor	3.54726	101.678		Selangor									DAERAH	8.4.2020	6.4.2020	8.4.2020	NEGATIF				NEGATIF
hs655	hs655	36	29/1/1985	Melayu	Female	Citizen	E1, Kuarters IKBN Pertak, Kuala Kubu Bharu, Selangor	3.54726	101.678		Selangor						RAKAN SEKERJA			DAERAH	8.4.2020	6.4.2020	8.4.2020	NEGATIF				NEGATIF
hs656	hs656	35	20/9/1986	Lain-lain	Male	Citizen	G5, Kuarters IKBN Pertak, 44000 Kuala Kubu Bharu, Selangor	3.54726	101.678		Selangor									DAERAH	8.4.2020	6.4.2020	8.4.2020	NEGATIF				NEGATIF
hs657	hs657	40	29/10/1981	Melayu	Female	Citizen	C2, Kuarters IKBN Peretak, 44000 Kuala Kubu Bharu, Selangor	3.54726	101.678		Selangor									DAERAH	8.4.2020	6.4.2020	8.4.2020	NEGATIF				NEGATIF
hs658	hs658	35	22/6/1986	Melayu	Female	Citizen	G12, Kuarters IKBN Pertak, 44000 Kuala Kubu Bharu, Selangor	3.54726	101.678		Selangor									DAERAH	8.4.2020	6.4.2020	8.4.2020	NEGATIF				NEGATIF
hs659	hs659	36	1985-07-08	Melayu	Female	Citizen	G13, Kuarters IKBN Pertak, 44000 Kuala Kubu Bharu, Selangor	3.54726	101.678		Selangor									DAERAH	8.4.2020	6.4.2020	8.4.2020	NEGATIF				NEGATIF
hs66	hs66	63	1958-01-02	Melayu	Male	Citizen	NO.300A,KG ASAM KUMBANG,KKB	3.56288	101.665		Selangor									DAERAH	05.03.2020			NEGATIF				NEGATIF
hs660	hs660	32	25/4/1989	Melayu	Female	Citizen	G11, Kuarters IKBN Pertak, 44000 Kuala Kubu Bharu, Selangor	3.54726	101.678		Selangor						RAKAN SEKERJA			DAERAH	8.4.2020	6.4.2020	8.4.2020	NEGATIF				NEGATIF
hs661	hs661	16	22/11/2005	Melayu	Female	Citizen	E8, Kuarters IKBN Pertak, 44000 Kuala Kubu Bharu, Selangor	3.54726	101.678		Selangor				NO		KELUARGA			DAERAH	8.4.2020	6.4.2020	8.4.2020	NEGATIF				NEGATIF
hs662	hs662	13	15/11/2008	Melayu	Male	Citizen	E8, Kuarters IKBN Pertak, 44000 Kuala Kubu Bharu, Selangor	3.54726	101.678		Selangor				NO		KELUARGA			DAERAH	8.4.2020	6.4.2020	8.4.2020	NEGATIF				NEGATIF
hs663	hs663	46	18/5/1975	Melayu	Female	Citizen	No.85, Kampung Sg masin, Batang Kali	3.46374	101.656		Selangor									DAERAH	8.4.2020	7.4.200	9.4.2020	NEGATIF				NEGATIF
hs664	hs664	36	31/8/1985	Melayu	Female	Citizen	No.20, Jalan Mahagoni 4G, Faas 4, Tamu Hill, Batang Kali	3.45763	101.668		Selangor									DAERAH	8.4.2020	7.4.200	9.4.2020	NEGATIF				NEGATIF
hs665	hs665	38	1983-01-05	Melayu	Female	Citizen	No.11, Jalan Ampang Pecah 17, Taman Ampang Pecah, Kuala Kubu Bharu	3.54854	101.659		Selangor									DAERAH	8.4.2020	7.4.200	9.4.2020	NEGATIF				NEGATIF
hs666	hs666	31	1990-11-02	Melayu	Female	Citizen	No.21, Jalan Semarak 1E, Taman Semarak, 44300 Batang Kali	3.46466	101.652		Selangor									DAERAH	9.4.2020	8.4.2020	10.4.2020	NEGATIF				NEGATIF
hs667	hs667	34	1987-04-09	Melayu	Female	Citizen	No.9, Jalan Ampang 17. Taman Ampang Pecah, Kuala Kubu Bharu	3.54624	101.659		Selangor									DAERAH	10.4.2020	9.4.2020	11.4.2020	NEGATIF				NEGATIF
hs668	hs668	45	1976-07-07	Melayu	Male	Citizen	No E7 Kuarters IKBN Peretak Ampang Pecah Kuala Kubu Bharu	3.54726	101.678		Selangor				NO		JIRAN					4.4.2020	5.4.2020	NEGATIF				NEGATIF
hs669	hs669	46	1975-09-08	Melayu	Female	Citizen	No E7 Kuarters IKBN Peretak Ampang Pecah Kuala Kubu Bharu	3.54726	101.678		Selangor				YES		JIRAN					4.4.2020	5.4.2020	NEGATIF				NEGATIF
hs67	hs67			Melayu	Male	Citizen	JABATAN KEBAJIKAN IJOK,KUALA SELANGOR	3.32836	101.253		Selangor									DAERAH				NEGATIF				NEGATIF
hs670	hs670	11	26/11/2010	Melayu	Male	Citizen	No E7 Kuarters IKBN Peretak Ampang Pecah Kuala Kubu Bharu	3.54726	101.678		Selangor				NO		JIRAN					4.4.2020	5.4.2020	NEGATIF				NEGATIF
hs671	hs671	12	18/2/2009	Melayu	Female	Citizen	No E7 Kuarters IKBN Peretak Ampang Pecah Kuala Kubu Bharu	3.54726	101.678		Selangor				NO		JIRAN					4.4.2020	5.4.2020	NEGATIF				NEGATIF
hs672	hs672	6	21/3/2015	Melayu	Female	Citizen	No E7 Kuarters IKBN Peretak Ampang Pecah Kuala Kubu Bharu	3.54726	101.678		Selangor				NO		JIRAN					4.4.2020	5.4.2020	NEGATIF				NEGATIF
hs673	hs673	17	23/7/2004	Melayu	Female	Citizen	No E7 Kuarters IKBN Peretak Ampang Pecah Kuala Kubu Bharu	3.54726	101.678		Selangor				NO		JIRAN					4.4.2020	5.4.2020	NEGATIF				NEGATIF
hs674	hs674	38	20/5/1983	Melayu	Female	Citizen	E3, KUARTERS IKBN PERTAK, KUALA KUBU BHARU, SELANGOR	3.54726	101.678		Selangor						RAKAN SEKERJA							NEGATIF				NEGATIF
hs675	hs675	48	28/5/1973	Melayu	Female	Citizen	PT 1889, TAMAN SERI CAHAYA, 44300 BATANG KALI, SELANGOR	3.47511	101.64		Selangor						RAKAN SEKERJA							NEGATIF				NEGATIF
hs676	hs676	43	1978-01-09	Melayu	Female	Citizen	NO 1, JALAN TANJAK 2A, TAMAN TANJAK, 44000 KUALA KUBU BHARU	3.54555	101.662		Selangor						RAKAN SEKERJA							NEGATIF				NEGATIF
hs677	hs677	49	20/8/1972	Melayu	Female	Citizen	NO 19, JALAN TANJAK 1B, TAMAN TANJAK, 44000 KUALA KUBU BHARU, SELANGOR	3.5449	101.66		Selangor						RAKAN SEKERJA							NEGATIF				NEGATIF
hs678	hs678	49	1972-06-04	Melayu	Female	Citizen	NO 23, KAMPUNG BUKIT RASA, 44200 RASA, SELANGOR	3.4957	101.627		Selangor						RAKAN SEKERJA							NEGATIF				NEGATIF
hs679	hs679	40	1981-10-05	Melayu	Female	Citizen	NO 134, JALAN 8, TAMAN ARIF UTAMA, 44000 KUALA KUBU BHARU, SELANGOR	3.565	101.664		Selangor						RAKAN SEKERJA							NEGATIF				NEGATIF
hs68	hs68	79	18/7/1942	Cina	Male	Citizen	Kebun Berdekatan S.J.K.C	1.49671	103.762		Selangor									TABLIGH	16.03.2021	16/3/2020	25.3.2020	NEGATIF				NEGATIF
hs680	hs680	62	1959-05-10	Melayu	Male	Citizen	NO 76, RKT ULU RENING, 44300 BATANG KALI, SELANGOR	3.48549	101.695		Selangor						RAKAN SEKERJA							NEGATIF				NEGATIF
hs681	hs681	11	2010-11-10	Melayu	Female	Citizen	Tahfiz As Sajidin	3.47146	101.64		Selangor						KELUARGA			TABLIGH	08.04.2020	7.4.2020	9.4.2020	NEGATIF				NEGATIF
hs682	hs682	9	21/7/2012	Melayu	Female	Citizen	Tahfiz As Sajidin	3.47146	101.64		Selangor						KELUARGA			TABLIGH	08.04.2020	7.4.2020	9.4.2020	NEGATIF				NEGATIF
hs683	hs683	6	2015-02-02	Melayu	Female	Citizen	Tahfiz As Sajidin	3.47146	101.64		Selangor						KELUARGA			TABLIGH	08.04.2020	7.4.2020	9.4.2020	NEGATIF				NEGATIF
hs684	hs684	5	18/2/2016	Melayu	Male	Citizen	Tahfiz As Sajidin	3.47146	101.64		Selangor						KELUARGA			TABLIGH	08.04.2020	7.4.2020	9.4.2020	NEGATIF				NEGATIF
hs685	hs685	4	14/6/2017	Melayu	Female	Citizen	Tahfiz As Sajidin	3.47146	101.64		Selangor						KELUARGA			TABLIGH	08.04.2020	7.4.2020	9.4.2020	NEGATIF				NEGATIF
hs686	hs686	32	25/7/1989	Melayu	Female	Citizen	Tahfiz As Sajidin	3.47146	101.64		Selangor						KELUARGA			TABLIGH	8.4.2020	7.4.2020	9.4.2020	NEGATIF				NEGATIF
hs687	hs687	40	20/3/1981	Melayu	Male	Citizen	Tahfiz As Sajidin	3.47146	101.64		Selangor						TAHFIZ			TABLIGH	8.4.2020	7.4.2020	9.4.2020	NEGATIF				NEGATIF
hs688	hs688	23	1998-09-01	Melayu	Male	Citizen	Tahfiz As Sajidin	3.47146	101.64		Selangor						TAHFIZ			TABLIGH	8.4.2020	7.4.2020	9.4.2020	NEGATIF				NEGATIF
hs689	hs689	10	24/9/2011	Melayu	Male	Citizen	Tahfiz As Sajidin	3.47146	101.64		Selangor						TAHFIZ			TABLIGH	9.4.2020	8.4.2020	10.4.2020	NEGATIF				NEGATIF
hs69	hs69	30	1991-04-11	Melayu	Male	Citizen	No.40 Jalan Meranti 2/1b,Bandar Utama Batang Kali	3.46156	101.655		Selangor									DAERAH	23.3.2020	23.3.2020	27.3.2020	NEGATIF				NEGATIF
hs690	hs690	15	2006-04-03	Melayu	Male	Citizen	A-4-12, Apartment Cempaka TBR, Bukit Beruntung	3.43794	101.548		Selangor						TAHFIZ			TABLIGH	9.4.2020	8.4.2020	10.4.2020	NEGATIF				NEGATIF
hs691	hs691	14	18/6/2007	Melayu	Male	Citizen	No.11A, Jalan Meranti 6B/3, BDr Utama Batang Kali	3.45612	101.659		Selangor						TAHFIZ			TABLIGH	9.4.2020	8.4.2020	10.4.2020	NEGATIF				NEGATIF
hs692	hs692	15	25/12/2005	Melayu	Male	Citizen	Tahfiz As Sajidin	3.47146	101.64		Selangor						TAHFIZ			TABLIGH	9.4.2020	8.4.2020	10.4.2020	NEGATIF				NEGATIF
hs693	hs693	19	27/12/2001	Melayu	Male	Citizen	Tahfiz As Sajidin	3.47146	101.64		Selangor						TAHFIZ			TABLIGH	9.4.2020	8.4.2020	10.4.2020	NEGATIF				NEGATIF
hs694	hs694	26	1995-08-09	Melayu	Male	Citizen	No.3A, Jalan Geriang Utama 4, Taman Geriang Utama	3.66745	101.525		Selangor						TAHFIZ			TABLIGH	9.4.2020	8.4.2020	10.4.2020	NEGATIF				NEGATIF
hs695	hs695	30	26/6/1991	Melayu	Male	Citizen	1554 Kg Jeram Hulu Tepoh,21060 Kuala Terengganu	5.3364	103.059		Selangor			Madrasah Tahfiz As-Sajidin, JKR 1033, Jln Besar Ulu Yam Masjid Lama Batang Kali			TAHFIZ							NEGATIF				NEGATIF
hs696	hs696	18	2002-09-12	Melayu	Male	Citizen	Tahfiz Al-Quran As-Sajidin Jalan Lama Ulu Yam,Batang Kali	3.4332	101.658		Selangor						TAHFIZ							NEGATIF				NEGATIF
hs697	hs697			Melayu	Male	Citizen	Madrasah Tahfiz As-Sajidin, JKR 1033, Jln Besar Ulu Yam Masjid Lama Batang Kali	3.47146	101.64		Selangor						TAHFIZ							NEGATIF				NEGATIF
hs698	hs698	19	2002-07-06	Melayu	Male	Citizen	Madrasah Tahfiz As-Sajidin, JKR 1033, Jln Besar Ulu Yam Masjid Lama Batang Kali	3.47146	101.64		Selangor						TAHFIZ							NEGATIF				NEGATIF
hs699	hs699	16	2005-07-10	Melayu	Male	Citizen	No.4 Jalan Mahagoni 2B/ 1A, Bandar Baru Batang Kali	3.45763	101.668		Selangor						TAHFIZ					30.3.2020	4.4.2020	NEGATIF				NEGATIF
hs7	hs7	20	2001-02-04	Melayu	Female	Citizen	NO 43, JALAN SERULING 5/1, TAMAN SERULING, 08000 SG PETANI, KEDAH	5.63948	100.517		Selangor			UIA GAMBANG, KUANTAN, PAHANG (MATRIKULASI)	YES									NEGATIF				NEGATIF
hs70	hs70	49	1972-08-11	Melayu	Male	Citizen	No.26 Rumah Murah Jalan Hang Kasturi,Pdg Golf	1.49752	103.63		Selangor									DAERAH	19.03.2021	19/3/2020	21.3.2020	NEGATIF				NEGATIF
hs700	hs700	14	15/5/2007	Melayu	Male	Citizen	Tahfiz Al-Quran As-Sajidin Jalan Lama Ulu Yam,Batang Kali	3.4332	101.658		Selangor						TAHFIZ							NEGATIF				NEGATIF
hs701	hs701	17	15/1/2004	Melayu	Male	Citizen	Madrasah Tahfiz As-Sajidin, JKR 1033, Jln Besar Ulu Yam Masjid Lama Batang Kali	3.47146	101.64		Selangor						TAHFIZ							NEGATIF				NEGATIF
hs702	hs702	12	29/6/2009	Melayu	Male	Citizen	Madrasah Tahfiz As-Sajidin, JKR 1033, Jln Besar Ulu Yam Masjid Lama Batang Kali	3.47146	101.64		Selangor						TAHFIZ							NEGATIF				NEGATIF
hs703	hs703	16	16/11/2005	Melayu	Male	Citizen	No 316 Felda Kota Gelang 2, Jerantut Pahang	3.90727	102.64		Selangor			TAHFIZ AL-QURAN AS-SAJIDIN JALAN LAMA ULU YAM,BATANG KALI			TAHFIZ					12.03.2020	15.03.2020	NEGATIF				NEGATIF
hs704	hs704	25	14/5/1996	Melayu	Male	Citizen	Tahfiz Al-Quran As-Sajidin Jalan Lama Ulu Yam,Batang Kali	3.4332	101.658		Selangor						TAHFIZ							NEGATIF				NEGATIF
hs705	hs705	16	13/3/2005	Melayu	Male	Citizen	Tahfiz Al-Quran As-Sajidin Jalan Lama Ulu Yam,Batang Kali	3.4332	101.658		Selangor						TAHFIZ					12.03.2020	15.03.2020	NEGATIF	19.3.2020	21.03.2020	NEGATIF	NEGATIF
hs706	hs706	17	23/7/2004	Melayu	Male	Citizen	Madrasah Tahfiz As-Sajidin, JKR 1033, Jln Besar Ulu Yam Masjid Lama Batang Kali	3.47146	101.64		Selangor						TAHFIZ							NEGATIF				NEGATIF
hs707	hs707	15	2006-03-06	Melayu	Male	Citizen	Tahfiz Al-Quran As-Sajidin Jalan Lama Ulu Yam,Batang Kali	3.4332	101.658		Selangor						TAHFIZ					12.03.2020	15.03.2020	NEGATIF				NEGATIF
hs708	hs708	19	19/7/2002	Melayu	Male	Citizen	Madrasah Tahfiz As-Sajidin, JKR 1033, Jln Besar Ulu Yam Masjid Lama Batang Kali	3.47146	101.64		Selangor						TAHFIZ							NEGATIF				NEGATIF
hs709	hs709	14	30/3/2007	Melayu	Male	Citizen	Madrasah Tahfiz As-Sajidin, JKR 1033, Jln Besar Ulu Yam Masjid Lama Batang Kali	3.47146	101.64		Selangor						TAHFIZ							NEGATIF				NEGATIF
hs71	hs71	70	20/6/1951	India	Male	Citizen	No.75 Kg Air Panas Kerling	3.59695	101.615		Selangor									DAERAH	12.03.2021	17/3/2020	19/3/2020	NEGATIF				NEGATIF
hs710	hs710	17	2004-01-03	Melayu	Male	Citizen	Lot 128, Lorong Sentosa 4, Kg Melayu Batu 16 Rawang	3.30644	101.591		Selangor			Madrasah Tahfiz As-Sajidin, JKR 1033, Jln Besar Ulu Yam Masjid Lama Batang Kali			TAHFIZ					1.4.2020	5.4.2020	NEGATIF				NEGATIF
hs711	hs711	15	23/8/2006	Melayu	Male	Citizen	Madrasah Tahfiz As-Sajidin, JKR 1033, Jln Besar Ulu Yam Masjid Lama Batang Kali	3.47146	101.64		Selangor						TAHFIZ							NEGATIF				NEGATIF
hs712	hs712	14	2007-10-07	Melayu	Male	Citizen	No. 15, Jalan Cengal 5, Desa Aman, Kg Sg Masin, Batang Kali	3.46838	101.661		Selangor						TAHFIZ					19.3.2020	25.3.2020	NEGATIF				NEGATIF
hs713	hs713	20	2001-03-03	Melayu	Male	Citizen	J-1-34, Apt Kenanga Taman Bunga Raya				Selangor			Tahfiz Al-Quran As-Sajidin Jalan Lama Ulu Yam,Batang Kali			TAHFIZ					1.4.2020	7.4.2020	NEGATIF	12.03.2020	15.03.2020	NEGATIF	NEGATIF
hs714	hs714	20	17/2/2001	Melayu	Male	Citizen	Madrasah Tahfiz As-Sajidin, JKR 1033, Jln Besar Ulu Yam Masjid Lama Batang Kali	3.47146	101.64		Selangor						TAHFIZ							NEGATIF				NEGATIF
hs715	hs715	59	1962-02-07	Melayu	Male	Citizen	Tahfiz As Sajidin	3.47146	101.64		Selangor						TAHFIZ					7.4.2020	9.4.2020	NEGATIF	13.4.2020	15.4.2020	NEGATIF	NEGATIF
hs716	hs716	17	27/2/2004	Melayu	Female	Citizen	Lot 1391 Taman Genting Permai	3.3871	101.774		Selangor				NO		KELUARGA			TABLIGH	6.4.2020	7.4.2020	9.4.2020	NEGATIF				NEGATIF
hs717	hs717	11	2010-07-01	Melayu	Male	Citizen	Lot 1391, Taman Genting Permai, Batang Kali	3.46487	101.659		Selangor				NO		KELUARGA			TABLIGH	8.4.2020	7.4.2020	9.4.2020	NEGATIF				NEGATIF
hs718	hs718	22	20/3/1999	Melayu	Female	Citizen	Lot 1391, Taman Genting Permai, Batang Kali	3.46487	101.659		Selangor				NO		KELUARGA			TABLIGH	8.4.2020	7.4.2020	9.4.2020	NEGATIF				NEGATIF
hs719	hs719	21	2000-01-05	Melayu	Male	Citizen	Lot 1391, Taman Genting Permai, Batang Kali	3.46487	101.659		Selangor				NO		KELUARGA			TABLIGH	8.4.2020	7.4.2020	9.4.2020	NEGATIF				NEGATIF
hs72	hs72	59	23/5/1962	Melayu	Male	Citizen	No.80 Jalan Meranti 6c,Seksyen 3 Bandar Utama Batang Kali	3.45749	101.658		Selangor									TABLIGH	12.03.2020	17/3/2020	19/3/2020	NEGATIF				NEGATIF
hs720	hs720	44	1977-12-10	Melayu	Female	Citizen	Lot 1391, Taman Genting Permai, Batang Kali	3.46487	101.659		Selangor				NO		KELUARGA			TABLIGH	8.4.2020	7.4.2020	9.4.2020	NEGATIF				NEGATIF
hs721	hs721	59	1962-01-01	Melayu	Male	Citizen	No.6624, Jalan Besar Felda Gedangsa, Hulu Selangor	3.68118	101.521		Selangor				NO		SERUMAH			DAERAH	8.4.2020	7.4.2020	9.4.2020	NEGATIF				NEGATIF
hs722	hs722	31	27/1/1990	Melayu	Female	Citizen	Z50 KG TENGAH FELDA GEDANGSA	3.74185	101.384		Selangor				NO		SAUDARA							NEGATIF				NEGATIF
hs723	hs723	38	1983-02-01	Melayu	Male	Citizen	Z50 KG TENGAH FELDA GEDANGSA	3.74185	101.384		Selangor				NO		SAUDARA							NEGATIF				NEGATIF
hs724	hs724	7	15/10/2014	Melayu	Female	Citizen	Z50 KG TENGAH FELDA GEDANGSA	3.74185	101.384		Selangor				NO		SAUDARA							NEGATIF				NEGATIF
hs725	hs725	34	13/6/1987	Melayu	Male	Citizen	A-8-12 APT INTAN JLN INTAN 4 41750 PUCHONG SELANGOR	3.0178	101.605		Selangor				NO		SAUDARA							NEGATIF				NEGATIF
hs726	hs726	20	28/9/2001	Melayu	Male	Citizen	Madrasah Quran Wa Sunnah Jalan Lama Genting	3.43466	101.695		Selangor									TABLIGH	13.3.2020	24.3.2020	31.3.2020	NEGATIF				NEGATIF
hs727	hs727	16	16/5/2005	Melayu	Male	Citizen	Madrasah Quran Wa Sunnah Jalan Lama Genting	3.43466	101.695		Selangor									TABLIGH	16.3.2020		TIADA SAMPEL DIAMBIL	NEGATIF	13.4.2020	15.4.2020	NEGATIF	NEGATIF
hs728	hs728	13	26/4/2008	Melayu	Male	Citizen	Madrasah Quran Wa Sunnah Jalan Lama Genting	3.43466	101.695		Selangor									TABLIGH	25.3.2020	24.3.2020	31.3.2020	NEGATIF	13.4.2020	15.4.2020	NEGATIF	NEGATIF
hs729	hs729			Foreigner	Male	Non-citizen	Madrasah Quran Wa Sunnah Jalan Lama Genting	3.43466	101.695		Selangor									TABLIGH	25.3.2020	24.3.2020	3.3.2020	NEGATIF				NEGATIF
hs73	hs73	46	1975-02-01	Melayu	Male	Citizen	G-01 Kuaters Guru,Sk Bukit Sentosa	3.41514	101.585		Selangor									TABLIGH	12.03.2020	17/3/2020	19/3/2020	NEGATIF				NEGATIF
hs730	hs730			Foreigner	Male	Non-citizen	Madrasah Quran Wa Sunnah Jalan Lama Genting	3.43466	101.695		Selangor									TABLIGH	25.3.2020	24.3.2020	31.3.2020	NEGATIF	13.4.2020	15.4.2020	NEGATIF	NEGATIF
hs731	hs731	16	14/8/2005	Melayu	Male	Citizen	Madrasah Quran Wa Sunnah Jalan Lama Genting	3.43466	101.695		Selangor									TABLIGH	3.4.2020	31.3.2020	4.4.2020	NEGATIF	13.4.2020	15.4.2020	NEGATIF	NEGATIF
hs732	hs732	14	17/1/2007	Melayu	Male	Citizen	Madrasah Quran Wa Sunnah Jalan Lama Genting	3.43466	101.695		Selangor									TABLIGH	3.4.2020	31.3.2020	4.4.2020	NEGATIF	13.4.2020	15.4.2020	NEGATIF	NEGATIF
hs733	hs733			Foreigner	Male	Non-citizen	Madrasah Quran Wa Sunnah Jalan Lama Genting	3.43466	101.695		Selangor									TABLIGH	14.4.2020	13.4.2020	15.4.2020	NEGATIF	15.4.2020	16.4.2020	NEGATIF	NEGATIF
hs734	hs734	3	2018-06-07	Melayu	Male	Citizen	Madrasah Quran Wa Sunnah Jalan Lama Genting	3.43466	101.695		Selangor									DAERAH	19.4.2020	12.4.2020	15.4.2020	NEGATIF				NEGATIF
hs735	hs735	25	31/1/1996	Melayu	Female	Citizen	Madrasah Quran Wa Sunnah Jalan Lama Genting	3.43466	101.695		Selangor									DAERAH	19.4.2020	15.4.2020	16.4.2020	NEGATIF				NEGATIF
hs736	hs736	15	30/5/2006	Melayu	Female	Citizen	Madrasah Quran Wa Sunnah Jalan Lama Genting	3.43466	101.695		Selangor									TABLIGH	14.4.2020	13.4.2020	15.4.2020	NEGATIF				NEGATIF
hs737	hs737	20	30/6/2001	Melayu	Female	Citizen	Madrasah Quran Wa Sunnah Jalan Lama Genting	3.43466	101.695		Selangor									TABLIGH	14.4.2020	13.4.2020	15.4.2020	NEGATIF				NEGATIF
hs738	hs738	13	29/6/2008	Melayu	Male	Citizen	Madrasah Quran Wa Sunnah Jalan Lama Genting	3.43466	101.695		Selangor									DAERAH	25.3.2020	25.3.2020	31.3.2020	NEGATIF	13.4.2020	15.4.2020	NEGATIF	NEGATIF
hs739	hs739			Foreigner	Male	Non-citizen	Madrasah Quran Wa Sunnah Jalan Lama Genting	3.43466	101.695		Selangor									DAERAH	27.3.2020	25.3.2020	31.3.2020	NEGATIF	13.4.2020	15.4.2020	NEGATIF	NEGATIF
hs740	hs740	29	1992-02-07	Melayu	Male	Citizen	Madrasah Quran Wa Sunnah Jalan Lama Genting	3.43466	101.695		Selangor									TABLIGH	25.3.2020	24.3.2020	31.3.2020	NEGATIF				NEGATIF
hs741	hs741			Foreigner	Male	Non-citizen	Madrasah Quran Wa Sunnah Jalan Lama Genting	3.43466	101.695		Selangor									TABLIGH	14.4.2020	13.4.2020	15.4.2020	NEGATIF				NEGATIF
hs742	hs742	57	25/8/1964	Melayu	Female	Citizen	Lot 884, Jalan Kg Kuantan, Batang Kali	3.468	101.677		Selangor									TABLIGH	14.4.2020	13.4.2020	15.4.2020	NEGATIF				NEGATIF
hs743	hs743			Foreigner	Male	Non-citizen	Madrasah Quran Wa Sunnah Jalan Lama Genting	3.43466	101.695		Selangor									TABLIGH	14.4.2020	13.4.2020	15.4.2020	NEGATIF				NEGATIF
hs744	hs744			Foreigner	Male	Non-citizen	Madrasah Quran Wa Sunnah Jalan Lama Genting	3.43466	101.695		Selangor									TABLIGH	14.4.2020	13.4.2020	15.4.2020	NEGATIF				NEGATIF
hs745	hs745	13	2008-07-04	Melayu	Male	Citizen	L-2-25, Apartment Anggerik TBR, Bukit Beruntung	3.44619	101.548		Selangor									DAERAH	16.4.2020	15.4.2020	17.4.2020	NEGATIF				NEGATIF
hs746	hs746	12	25/12/2008	Melayu	Male	Citizen	F-1-32, Apartment Teratai TBR, Bukit Beruntung	3.44452	101.554		Selangor									DAERAH	16.4.2020	15.4.2020	17.4.2020	NEGATIF				NEGATIF
hs747	hs747	13	2008-02-01	Melayu	Female	Citizen	H-2-3, Apartment Anggerik TBR, Bukit Beruntung	3.44636	101.547		Selangor									DAERAH	16.4.2020	15.4.2020	17.4.2020	NEGATIF				NEGATIF
hs748	hs748	13	2008-07-02	Melayu	Female	Citizen	H-3-4, Apartment Kenanga TBR, Bukit Beruntung	3.43349	101.564		Selangor									DAERAH	16.4.2020	15.4.2020	17.4.2020	NEGATIF				NEGATIF
hs749	hs749	13	24/6/2008	Melayu	Female	Citizen	J-3-33A, Apartment Teratai TBR, Bukit Beruntug	3.44452	101.554		Selangor									DAERAH	16.4.2020	15.4.2020	17.4.2020	NEGATIF				NEGATIF
hs75	hs75	16	13/9/2005	Melayu	Male	Citizen	NO 9, KG SG MASIN, BTG KALI, SELANGOR	3.46452	101.658		Selangor						SOSIAL					19.03.2020		NEGATIF				NEGATIF
hs750	hs750	13	24/10/2008	Melayu	Male	Citizen	A-1-15, Apartment Dahlia TBR, Bukit Beruntung	3.43071	101.562		Selangor									DAERAH	16.4.2020	15.4.2020	17.4.2020	NEGATIF				NEGATIF
hs751	hs751	13	2008-07-10	Melayu	Male	Citizen	L-G-26, Apartment Dahlia TBR, Bukit Beruntung	3.43071	101.562		Selangor									DAERAH	16.4.2020	15.4.2020	17.4.2020	NEGATIF				NEGATIF
hs752	hs752	13	2008-12-04	Melayu	Male	Citizen	No.20, Jalan Widuri 1C, Bukit Beruntung	3.43141	101.591		Selangor									DAERAH	16.4.2020	15.4.2020	17.4.2020	NEGATIF				NEGATIF
hs753	hs753	13	23/6/2008	Melayu	Female	Citizen	No.42, Jalan Kasturi 4C, Bukit Beruntung	3.40574	101.573		Selangor									DAERAH	16.4.2020	15.4.2020	17.4.2020	NEGATIF				NEGATIF
hs754	hs754	13	28/3/2008	Melayu	Female	Citizen	J-G-15, Apartment Anggerik TBR, Bukit Beruntung	3.44636	101.547		Selangor									DAERAH	16.4.2020	15.4.2020	17.4.2020	NEGATIF				NEGATIF
hs755	hs755	13	21/3/2008	Melayu	Female	Citizen	M-2-27, Apartment Dahlia TBR, Bukit Beruntung	3.43071	101.562		Selangor									DAERAH	16.4.2020	15.4.2020	17.4.2020	NEGATIF				NEGATIF
hs756	hs756	13	2008-03-11	Melayu	Female	Citizen	J-1-12, Apartment Dahlia TBR, Bukit Beruntung	3.43071	101.562		Selangor									DAERAH	16.4.2020	15.4.2020	17.4.2020	NEGATIF				NEGATIF
hs757	hs757	13	29/4/2008	Melayu	Female	Citizen	D-G-7, Apartment Mawar TBR, Bukit Beruntung	3.44466	101.546		Selangor									DAERAH	16.4.2020	15.4.2020	17.4.2020	NEGATIF				NEGATIF
hs758	hs758	13	14/11/2008	Melayu	Male	Citizen	J-2-13, Apartment Dahlia TBR, Bukit Beruntung	3.43071	101.562		Selangor									DAERAH	16.4.2020	15.4.2020	17.4.2020	NEGATIF				NEGATIF
hs759	hs759	13	18/5/2008	Melayu	Male	Citizen	N-G-26, Apartment Dahlia TBR, Bukit Beruntung	3.43071	101.562		Selangor									DAERAH	16.4.2020	15.4.2020	17.4.2020	NEGATIF				NEGATIF
hs76	hs76	14	30/3/2007	Melayu	Male	Citizen	NO 62A, KG SG MASIN, BTG KALI	3.46452	101.658		Selangor						SOSIAL					19.03.2020		NEGATIF				NEGATIF
hs760	hs760	13	27/3/2008	Melayu	Female	Citizen	A-3-01, Apartment Kemuning TBR, Bukit Beruntung	3.44477	101.553		Selangor									DAERAH	16.4.2020	15.4.2020	17.4.2020	NEGATIF				NEGATIF
hs761	hs761	13	27/9/2008	Melayu	Female	Citizen	A-3-01, Apartment Kemuning TBR, Bukit Beruntung	3.44477	101.553		Selangor									DAERAH	16.4.2020	15.4.2020	17.4.2020	NEGATIF				NEGATIF
hs762	hs762	13	18/7/2008	Melayu	Male	Citizen	E-3-03, Apartment Kemuning TBR, Bukit Beruntung	3.44477	101.553		Selangor									DAERAH	16.4.2020	15.4.2020	17.4.2020	NEGATIF				NEGATIF
hs763	hs763	13	2008-02-04	Melayu	Male	Citizen	B-2-18, Apartment Dahlia TBR, Bukit Beruntung	3.43071	101.562		Selangor									DAERAH	16.4.2020	15.4.2020	17.4.2020	NEGATIF				NEGATIF
hs764	hs764	13	2008-05-02	Melayu	Male	Citizen	No.87, Jalan Bunga Kertas 2, Bukit Sentosa	3.39912	101.558		Selangor									DAERAH	16.4.2020	15.4.2020	17.4.2020	NEGATIF				NEGATIF
hs765	hs765	13	20/3/2008	Melayu	Male	Citizen	J-2-03, Apartment Dahlia TBR, Bukit Beruntung	3.43071	101.562		Selangor									DAERAH	16.4.2020	15.4.2020	17.4.2020	NEGATIF				NEGATIF
hs766	hs766	13	2008-11-05	Melayu	Male	Citizen	P-1-26, Apartment Dahlia TBR, Bukit Beruntung	3.43071	101.562		Selangor									DAERAH	16.4.2020	15.4.2020	17.4.2020	NEGATIF				NEGATIF
hs767	hs767	13	2008-01-05	Melayu	Male	Citizen	P-LG-07, Apartment Dahlia TBR, Bukit Beruntung	3.43757	101.548		Selangor									DAERAH	16.4.2020	15.4.2020	17.4.2020	NEGATIF				NEGATIF
hs768	hs768	13	26/4/2008	Melayu	Male	Citizen	H-G-1, Apartment Teratai TBR, Bukit Beruntung	3.44452	101.554		Selangor									DAERAH	16.4.2020	15.4.2020	17.4.2020	NEGATIF				NEGATIF
hs769	hs769	13	29/11/2008	Melayu	Male	Citizen	E-2-30, Apartment Dahlia TBR, Bukit Beruntung				Selangor									DAERAH	16.4.2020	15.4.2020	17.4.2020	NEGATIF				NEGATIF
hs77	hs77	16	16/5/2005	Melayu	Male	Citizen	NO 1398 TMN GENTING PERMAI, BTG KALI	3.46647	101.661		Selangor						SOSIAL					19.03.2020		NEGATIF				NEGATIF
hs770	hs770	39	19/10/1982	Melayu	Female	Citizen	J-3-5, APT CEMPAKA, TAMAN BUNGA RAYA, 48300 BUKIT BERUNTUNG, SELANGOR.	3.43939	101.55		Selangor				NO		KELUARGA							NEGATIF				NEGATIF
hs771	hs771	14	2007-10-04	Melayu	Female	Citizen	J-3-5, APT CEMPAKA, TAMAN BUNGA RAYA, 48300 BUKIT BERUNTUNG, SELANGOR.	3.43939	101.55		Selangor				NO		KELUARGA							NEGATIF				NEGATIF
hs772	hs772	33	1988-04-12	Melayu	Male	Citizen	G21-1-3, JALAN AUR, DESA MAJU, KOMPLEKS PENJARA SUNGAI BULOH, 47000 SUNGAI BULOH, SELANGOR	3.22987	101.494		Selangor				NO		KELUARGA							NEGATIF				NEGATIF
hs773	hs773	33	25/5/1988	Melayu	Female	Citizen	G21-1-3, JALAN AUR, DESA MAJU, KOMPLEKS PENJARA SUNGAI BULOH, 47000 SUNGAI BULOH, SELANGOR	3.22987	101.494		Selangor				NO		KELUARGA							NEGATIF				NEGATIF
hs774	hs774	67	24/4/1954	Melayu	Male	Citizen	LOT 1994, JALAN LUBOK PUSING, PEKAN BAGAN TERAP, 45300 SG. BESAR, SELANGOR	3.75994	101.073		Selangor				NO		KELUARGA							NEGATIF				NEGATIF
hs775	hs775	32	15/8/1989	Melayu	Male	Citizen	LOT 1994, JALAN LUBOK PUSING, PEKAN BAGAN TERAP, 45300 SG. BESAR, SELANGOR	3.75994	101.073		Selangor				NO		KELUARGA							NEGATIF				NEGATIF
hs776	hs776	32	25/1/1989	Melayu	Female	Citizen	LOT 1994, JALAN LUBOK PUSING, PEKAN BAGAN TERAP, 45300 SG. BESAR, SELANGOR	3.75994	101.073		Selangor				NO		KELUARGA							NEGATIF				NEGATIF
hs777	hs777	8	26/8/2013	Melayu	Male	Citizen	LOT 1994, JALAN LUBOK PUSING, PEKAN BAGAN TERAP, 45300 SG. BESAR, SELANGOR	3.75994	101.073		Selangor				NO		KELUARGA							NEGATIF				NEGATIF
hs778	hs778	5	30/5/2016	Melayu	Female	Citizen	LOT 1994, JALAN LUBOK PUSING, PEKAN BAGAN TERAP, 45300 SG. BESAR, SELANGOR	3.75994	101.073		Selangor				NO		KELUARGA							NEGATIF				NEGATIF
hs779	hs779	2	2019-09-10	Melayu	Male	Citizen	LOT 1994, JALAN LUBOK PUSING, PEKAN BAGAN TERAP, 45300 SG. BESAR, SELANGOR	3.75994	101.073		Selangor				NO		KELUARGA							NEGATIF				NEGATIF
hs78	hs78	17	2004-05-10	Melayu	Male	Citizen	NO 2, JALAN CENGAL 3/1, DESA ALAM RIA, BTG KALI	3.46742	101.661		Selangor						SOSIAL					19.03.2020		NEGATIF				NEGATIF
hs780	hs780	43	14/3/1978	Melayu	Male	Citizen	LOT 1994, JALAN LUBOK PUSING, PEKAN BAGAN TERAP, 45300 SG. BESAR, SELANGOR	3.75994	101.073		Selangor				NO		KELUARGA							NEGATIF				NEGATIF
hs781	hs781	43	15/5/1978	Melayu	Female	Citizen	LOT 1994, JALAN LUBOK PUSING, PEKAN BAGAN TERAP, 45300 SG. BESAR, SELANGOR	3.75994	101.073		Selangor				NO		KELUARGA							NEGATIF				NEGATIF
hs782	hs782	15	31/10/2006	Melayu	Male	Citizen	LOT 1994, JALAN LUBOK PUSING, PEKAN BAGAN TERAP, 45300 SG. BESAR, SELANGOR	3.75994	101.073		Selangor				NO		KELUARGA							NEGATIF				NEGATIF
hs783	hs783	13	29/9/2008	Melayu	Female	Citizen	LOT 1994, JALAN LUBOK PUSING, PEKAN BAGAN TERAP, 45300 SG. BESAR, SELANGOR	3.75994	101.073		Selangor				NO		KELUARGA							NEGATIF				NEGATIF
hs784	hs784	10	30/11/2011	Melayu	Male	Citizen	LOT 1994, JALAN LUBOK PUSING, PEKAN BAGAN TERAP, 45300 SG. BESAR, SELANGOR	3.75994	101.073		Selangor				NO		KELUARGA							NEGATIF				NEGATIF
hs785	hs785	13	2008-09-08	Melayu	Female	Citizen	No 7 Jalan Inai 4 Bukit Beruntung 48300 Rawang	3.43028	101.558		Selangor						SEKOLAH					1.4.2020	7.4.2020	NEGATIF				NEGATIF
hs786	hs786	13	2008-06-02	Melayu	Male	Citizen	F-2-21, Apartment Anggerik TBR, Bukit Beruntung	3.44619	101.548		Selangor						SEKOLAH					10.4.2020	12.4.2020	NEGATIF				NEGATIF
hs787	hs787	13	2008-06-03	Melayu	Female	Citizen	E 4-1 Apt Cempaka, Tmn Bunga Raya 48300 Rawang	3.43939	101.55		Selangor						SEKOLAH					1.4.2020	7.4.2020	NEGATIF				NEGATIF
hs788	hs788	13	2008-05-11	Melayu	Female	Citizen	N-G-12 APARTMENT DAHLIA,TAMAN BUNGA RAYA BUKIT BERUNTUNG, 48300 RAWANG SELANGOR	3.43757	101.548		Selangor						SEKOLAH							NEGATIF				NEGATIF
hs789	hs789	13	25/3/2008	Melayu	Female	Citizen	No 57 Jalan Kemboja 4B/2 Bukit Sentosa 3	3.41383	101.598		Selangor						SEKOLAH					14.4.2020	16.4.2020	NEGATIF				NEGATIF
hs79	hs79	18	20/3/2003	Melayu	Male	Citizen	NO 21, JALAN CENGAL 6, DESA ALAM RIA, BTG KALI	3.4689	101.66		Selangor						SOSIAL					19.03.2020		NEGATIF				NEGATIF
hs790	hs790	13	15/10/2008	Melayu	Female	Citizen	F-2-2 Apartment Kenanga Taman Bunga Raya Bukit Beruntung	3.43873	101.546		Selangor						SEKOLAH					14.4.2020	16.4.2020	NEGATIF				NEGATIF
hs791	hs791	13	2008-10-07	Melayu	Female	Citizen	Blok D-2-13a, Apartment Kemunting 48300 Rawang	3.44477	101.553		Selangor						SEKOLAH					1.4.2020	4.4.2020	NEGATIF				NEGATIF
hs792	hs792	13	28/10/2008	Melayu	Male	Citizen	C-3-8 Apartment Cempaka Taman Bunga Raya Bukit Beruntung	3.43794	101.548		Selangor						SEKOLAH					14.4.2020	16.4.2020	NEGATIF				NEGATIF
hs793	hs793	13	2008-05-11	Melayu	Male	Citizen	E-LG-13A Apartment Dahlia Taman Bunga Raya Bukit Beruntung	3.43757	101.548		Selangor						SEKOLAH					14.4.2020	16.4.2020	NEGATIF				NEGATIF
hs794	hs794	13	2008-11-07	Melayu	Male	Citizen	Q-1-17 Apt Dahlia Mk 48300 Rawang	3.43071	101.562		Selangor						SEKOLAH					1.4.2020	7.4.2020	NEGATIF				NEGATIF
hs795	hs795	13	18/10/2008	Melayu	Male	Citizen	D-5-3, Apt Cempaka, Taman Bunga Raya, Bukit Beruntung	3.43794	101.548		Selangor						SEKOLAH					6.4.2020	8.4.2020	NEGATIF				NEGATIF
hs796	hs796	11	31/5/2010	Melayu	Male	Citizen	N-2-23A Apartment Dahlia, Taman Bunga Raya Bukit Beruntung 48300 Rawang	3.43757	101.548		Selangor						KELUARGA			DAERAH	10.4.2020	9.4.2020	11.4.2020	NEGATIF				NEGATIF
hs797	hs797	45	17/6/1976	Melayu	Female	Citizen	J-G-06, Apartment Dahlia TBR, Bukit Beruntung	3.43071	101.562		Selangor									DAERAH	11.4.2020	10.4.2020	12.4.2020	NEGATIF				NEGATIF
hs798	hs798	44	1977-10-08	Melayu	Female	Citizen	No.16, Jalan Adenium 6B, Bukit Beruntung	3.42305	101.555		Selangor									DAERAH	11.4.2020	10.4.2020	12.4.2020	NEGATIF				NEGATIF
hs799	hs799	46	27/6/1975	Melayu	Female	Citizen	J-G-12, Apartment TBR, Bukit Beruntung	3.42439	101.557		Selangor									DAERAH	11.4.2020	10.4.2020	12.4.2020	NEGATIF				NEGATIF
hs8	hs8	20	17/2/2001	Melayu	Female	Citizen	NO 12, JALAN MEGA 15, TAMAN MEGA JAYA, 56100 KUALA LUMPUR	3.10803	101.763		Selangor			UIA GAMBANG, KUANTAN, PAHANG (MATRIKULASI)	NO									NEGATIF				NEGATIF
hs80	hs80	15	24/9/2006	Melayu	Male	Citizen	1453 TAMAN GENTING PERMAI, BTG KALI	3.46647	101.661		Selangor						SOSIAL					19.03.2020		NEGATIF				NEGATIF
hs800	hs800	13	2008-06-02	Melayu	Male	Citizen	F-2-21, Apartment Anggerik TBR, Bukit Beruntung	3.44619	101.548		Selangor						SEKOLAH			DAERAH	11.4.2020	10.4.2020	12.4.2020	NEGATIF				NEGATIF
hs801	hs801	13	25/6/2008	Melayu	Male	Citizen	J-2-04, Apartment Kenanga TBR, Bukit Beruntung	3.43349	101.564		Selangor									DAERAH	11.4.2020	10.4.2020	12.4.2020	NEGATIF				NEGATIF
hs802	hs802	46	26/3/1975	Melayu	Female	Citizen	H-1-40, Apartment Kenanga TBR, Bukit Beruntung	3.43349	101.564		Selangor									DAERAH	11.4.2020	10.4.2020	12.4.2020	NEGATIF				NEGATIF
hs803	hs803	9	2012-11-03	Melayu	Male	Citizen	AG-2-5, Apartment Kemuning TBR, Bukit Beruntung	3.42439	101.557		Selangor									DAERAH	14.4.2020	13.4.2020	15.4.2020	NEGATIF				NEGATIF
hs804	hs804	48	1973-09-01	Melayu	Male	Citizen	N-2-23A Apartment Dahlia, Taman Bunga Raya Bukit Beruntung 48300 Rawang	3.43757	101.548		Selangor						KELUARGA			DAERAH	18.4.2020	9.4.2020	9.4.2020	NEGATIF				NEGATIF
hs805	hs805	39	1982-02-06	Melayu	Female	Citizen	N-2-23A Apartment Dahlia, Taman Bunga Raya Bukit Beruntung 48300 Rawang	3.43757	101.548		Selangor						KELUARGA			DAERAH	10.4.2020	9.4.2020	11.4.2020	NEGATIF				NEGATIF
hs806	hs806	9	2012-10-02	Melayu	Female	Citizen	N-2-23A Apartment Dahlia, Taman Bunga Raya Bukit Beruntung 48300 Rawang	3.43757	101.548		Selangor						KELUARGA			DAERAH	10.4.2020	9.4.2020	11.4.2020	NEGATIF				NEGATIF
hs807	hs807	8	24/5/2013	Melayu	Female	Citizen	N-2-23A Apartment Dahlia, Taman Bunga Raya Bukit Beruntung 48300 Rawang	3.43757	101.548		Selangor						KELUARGA			DAERAH	10.4.2020	9.4.2020	11.4.2020	NEGATIF				NEGATIF
hs808	hs808	13	2008-07-08	Melayu	Male	Citizen	C-1-13, Apartment Anggerik TBR, Bukit Beruntung	3.44619	101.548		Selangor						SEKOLAH			DAERAH	14.4.2020	13.4.2020	15.4.2020	NEGATIF				NEGATIF
hs809	hs809	39	1981-01-21	Melayu	Female	Citizen	NO.13, JALAN MAWAR 3C/2, TAMAN MAWAR, PRIMA BERUNTUNG, 48300, RAWANG	3.39906	101.543		Selangor						SEKOLAH							NEGATIF				NEGATIF
hs81	hs81	15	2006-02-07	Melayu	Male	Citizen	1449 TAMAN GENTING PERMAI, BTG KALI	3.46647	101.661		Selangor						SOSIAL					19.03.2020		NEGATIF				NEGATIF
hs810	hs810	12	27/12/2008	Melayu	Male	Citizen	G-3-25, APARTMENT TERATAI, TAMAN BUNNGA RAYA, BUKIT BERUNTUNG, 48300, RAWANG	3.44489	101.552		Selangor						SEKOLAH							NEGATIF				NEGATIF
hs811	hs811	13	16/10/2008	Melayu	Male	Citizen	G-3-7 Apartment Cempaka Taman Bunga Raya Bukit Beruntung 48300 Rawang	3.43794	101.548		Selangor						SEKOLAH					1.4.2020	4.4.2020	NEGATIF				NEGATIF
hs812	hs812	13	15/11/2008	Melayu	Male	Citizen	F-2-19, Apartment Teratai TBR, Bukit Beruntung	3.42439	101.557		Selangor						SEKOLAH			DAERAH	14.4.2020	13.4.2020	15.4.2020	NEGATIF				NEGATIF
hs813	hs813	13	19/3/2008	Melayu	Male	Citizen	L-G-05 Apt Dahlia Taman Bunga Raya Bukit Beruntung 48300 Rawang	3.43799	101.551		Selangor						SEKOLAH					1.4.2020	4.4.2020	NEGATIF				NEGATIF
hs814	hs814	13	15/9/2008	Melayu	Male	Citizen	M-4-30, Apartment Kenanga TBR, Bukit Beruntung	3.43873	101.546		Selangor						SEKOLAH			DAERAH	14.4.2020	13.4.2020	15.4.2020	NEGATIF				NEGATIF
hs815	hs815	13	13/7/2008	Melayu	Male	Citizen	J-4-13 APARTMEN TERATAI TAMAN BUNGA RAYA BUKIT BERUNTUNG 48300 RAWANG SELANGOR	3.43799	101.551		Selangor													NEGATIF				NEGATIF
hs816	hs816	13	2008-03-10	Melayu	Male	Citizen	Blok G-G-38, Apartment Teratai TBR, Bukit Beruntung	3.44452	101.554		Selangor						SEKOLAH			DAERAH	14.4.2020	13.4.2020	15.4.2020	NEGATIF				NEGATIF
hs817	hs817	13	2008-06-11	Melayu	Male	Citizen	N-2-10, Apartment Dahlia TBR, Bukit Beruntung	3.43071	101.562		Selangor						SEKOLAH			DAERAH	14.4.2020	13.4.2020	15.4.2020	NEGATIF				NEGATIF
hs818	hs818	13	2008-03-02	Melayu	Male	Citizen	No.8, Jalan Inai 7, Perumahan Inai, Bukit Beruntung	3.42943	101.56		Selangor						SEKOLAH			DAERAH	14.4.2020	13.4.2020	15.4.2020	NEGATIF				NEGATIF
hs819	hs819	13	2008-08-08	Melayu	Male	Citizen	C-1-13, Apartment Mawat TBR, Bukit Beruntung	3.42034	101.586		Selangor						SEKOLAH			DAERAH	14.4.2020	13.4.2020	15.4.2020	NEGATIF				NEGATIF
hs82	hs82	15	2006-01-08	Melayu	Male	Citizen	TAMAN GENTING PERMAI	3.46487	101.659		Selangor						SOSIAL					19.03.2020		NEGATIF				NEGATIF
hs820	hs820	34	11/90/80	Melayu	Female	Citizen	C-G-01 APT CEMPAKA TMN BUNGA RAYA BKT BERUNTUNG 48300 RAWANG SEL	3.43939	101.55		Selangor						SEKOLAH							NEGATIF				NEGATIF
hs821	hs821	13	23/2/2008	Melayu	Male	Citizen	No.2, Jalan Inai 4 Sek BP3, Bukit Beruntung	3.43042	101.558		Selangor						SEKOLAH			DAERAH	14.4.2020	13.4.2020	15.4.2020	NEGATIF				NEGATIF
hs822	hs822	13	2008-06-11	Melayu	Female	Citizen	No.10, Jalan Adenium 5B/1, Sek BB5, Bukit Beruntung	3.42304	101.551		Selangor						SEKOLAH			DAERAH	14.4.2020	13.4.2020	15.4.2020	NEGATIF				NEGATIF
hs823	hs823	13	2008-01-12	Melayu	Female	Citizen	No.17, Jalan Anggeik 1D, Bukit Beruntung	3.42919	101.568		Selangor						SEKOLAH			DAERAH	14.4.2020	13.4.2020	15.4.2020	NEGATIF				NEGATIF
hs824	hs824	39	1981-01-22	Melayu	Female	Citizen	D-1-31 APT TERATAI ,TMN BUNGA RAYA BUKIT BERUNTUNG RAWANG SELANGOR	3.43799	101.551		Selangor						SEKOLAH							NEGATIF				NEGATIF
hs825	hs825	13	2008-10-04	Melayu	Male	Citizen	No.3, Jalan Mawar 2, Bukit Beruntung	3.42992	101.555		Selangor						SEKOLAH			DAERAH	14.4.2020	13.4.2020	15.4.2020	NEGATIF				NEGATIF
hs826	hs826	13	2008-12-09	Melayu	Male	Citizen	No.2, Jalan Adenium 2A/2, Bukit Beruntung	3.41857	101.554		Selangor						SEKOLAH			DAERAH	14.4.2020	13.4.2020	15.4.2020	NEGATIF				NEGATIF
hs827	hs827	12	23/12/2008	Melayu	Female	Citizen	B-2-2, Apartment Mawar TBR, Bukit Beruntung	3.40052	101.543		Selangor						SEKOLAH			DAERAH	14.4.2020	13.4.2020	15.4.2020	NEGATIF				NEGATIF
hs828	hs828	39	10/32/80	Melayu	Male	Citizen	M-G-05 APT DAHLIA TAMAN BUNGA RAYA BUKIT BERUNTUNG RAWANG SELANGOR	3.43799	101.551		Selangor						SEKOLAH					1.4.2020	7.4.2020	NEGATIF				NEGATIF
hs829	hs829	13	20/7/2008	Melayu	Female	Citizen	G-2-11 , Apartment Dahlia Taman Bunga Raya Bukit Beruntung 48300 Rawang	3.43757	101.548		Selangor						SEKOLAH							NEGATIF				NEGATIF
hs83	hs83	13	2008-05-06	Melayu	Male	Citizen	NO 1, KG GENTING MALIK, 44300 BTG KALI, SELANGOR	3.4666	101.664		Selangor						SOSIAL					19.03.2020		NEGATIF				NEGATIF
hs830	hs830	13	15/3/2008	Melayu	Male	Citizen	E-2-39, Apartment Kemuning TBR, Bukit Beruntung	3.42439	101.557		Selangor						SEKOLAH			DAERAH	14.4.2020	13.4.2020	15.4.2020	NEGATIF				NEGATIF
hs831	hs831	13	2008-11-01	Melayu	Male	Citizen	C-Lg-03 Apartment Dahlia Taman Bunga Raya Bukit Beruntung 48300 Rawang	3.43757	101.548		Selangor						SEKOLAH					1.4.2020	6.4.2020	NEGATIF				NEGATIF
hs832	hs832	38	30/1/1983	Melayu	Female	Citizen	LOT 355 JLN PALOH TEDNONG PASIR MAS KELANTAN	6.08113	102.214		Selangor													NEGATIF				NEGATIF
hs833	hs833	35	30/6/1986	Melayu	Female	Citizen	NO.362, FELDA SEBERTAK, BERA PAHANG	3.25345	102.601		Selangor													NEGATIF				NEGATIF
hs834	hs834	13	2008-10-05	Melayu	Male	Citizen	No.4, Jalan Inai 7, Bukit Beruntung	3.42946	101.56		Selangor						SEKOLAH			DAERAH	14.4.2020	13.4.2020	15.4.2020	NEGATIF				NEGATIF
hs835	hs835	13	16/4/2008	Melayu	Male	Citizen	J-1-13, Apartment Teratai TBR, Bukit Beruntung	3.44489	101.552		Selangor									DAERAH	14.4.2020	13.4.2020	15.4.2020	NEGATIF	10.4.2020	12.4.2020	NEGATIF	NEGATIF
hs836	hs836	13	20/4/2008	Melayu	Female	Citizen	No.63, Jalan Inai 3, Bukit Beruntung	3.43089	101.56		Selangor						SEKOLAH			DAERAH	14.4.2020	13.4.2020	15.4.2020	NEGATIF				NEGATIF
hs837	hs837	13	30/1/2008	Melayu	Male	Citizen	P-1-30, Apartment Dahlia TBR, Bukit Beruntung				Selangor						SEKOLAH			DAERAH	14.4.2020	13.4.2020	15.4.2020	NEGATIF				NEGATIF
hs838	hs838	13	25/5/2008	Melayu	Male	Citizen	D-1-29, Aparment Kemuning TBR, Bukit Beruntung	3.44077	101.552		Selangor						SEKOLAH			DAERAH	14.4.2020	13.4.2020	15.4.2020	NEGATIF				NEGATIF
hs839	hs839	13	16/11/2008	Melayu	Female	Citizen	M-1-28, Apartment Anggerik TBR, Bukit Beruntung	3.44619	101.548		Selangor						SEKOLAH			DAERAH	14.4.2020	13.4.2020	15.4.2020	NEGATIF				NEGATIF
hs84	hs84			Melayu	Male	Citizen	SURAU YAKINIAH	3.46374	101.656		Selangor						SOSIAL					19.03.2020		NEGATIF				NEGATIF
hs840	hs840	13	25/9/2008	Melayu	Male	Citizen	No.21, Jalan Bakawali 2C/4, Bukit Sentosa	3.40778	101.605		Selangor						SEKOLAH			DAERAH	14.4.2020	13.4.2020	15.4.2020	NEGATIF				NEGATIF
hs841	hs841	13	17/8/2008	Melayu	Male	Citizen	K-1-17, Apartment Anggerik TBR, Bukit Beruntung	3.44636	101.547		Selangor						SEKOLAH			DAERAH	14.4.2020	13.4.2020	15.4.2020	NEGATIF				NEGATIF
hs842	hs842	13	31/1/2008	Melayu	Female	Citizen	L-4-53, Apartment Teratai TBR, Bukit Beruntung	3.44452	101.554		Selangor						SEKOLAH			DAERAH	14.4.2020	13.4.2020	15.4.2020	NEGATIF				NEGATIF
hs843	hs843	13	29/4/2008	Melayu	Male	Citizen	L-3-36, Apartment Teratai TBR, Bukit Beruntung	3.44452	101.554		Selangor						SEKOLAH			DAERAH	14.4.2020	13.4.2020	15.4.2020	NEGATIF				NEGATIF
hs844	hs844	13	2008-09-10	Melayu	Male	Citizen	E-1-22, Apartment Teratai TBR, Bukit Beruntung	3.42439	101.557		Selangor						SEKOLAH			DAERAH	14.4.2020	13.4.2020	15.4.2020	NEGATIF				NEGATIF
hs845	hs845	13	2008-04-12	Melayu	Female	Citizen	No.5, Jalan Seoja 1A/1, Sek BB7, Bukit Beruntung	3.41725	101.569		Selangor						SEKOLAH			DAERAH	14.4.2020	13.4.2020	15.4.2020	NEGATIF				NEGATIF
hs846	hs846	55	1966-09-07	Melayu	Male	Citizen	No.21, Jalan Melor 3C, Bukit Beruntung	3.43237	101.566		Selangor						TUSYEN			DAERAH	14.4.2020	13.4.2020	15.4.2020	NEGATIF				NEGATIF
hs847	hs847	55	25/1/1966	Melayu	Female	Citizen	No.21, Jalan Melor 3C, Bukit Beruntung	3.43237	101.566		Selangor						SEKOLAH			DAERAH	14.4.2020	13.4.2020	15.4.2020	NEGATIF				NEGATIF
hs848	hs848	13	29/1/2008	Melayu	Male	Citizen	D-2-46, Apartment Kenanga TBR, Bukit Beruntung	3.44077	101.552		Selangor						TUSYEN					3.4.2020	13.4.2020	NEGATIF				NEGATIF
hs849	hs849	13	15/6/2008	Melayu	Male	Citizen	J-G-20, Apartment Dahlia, Taman Bunga Raya, Bukit Beruntung	3.43757	101.548		Selangor						TUSYEN					6.4.2020	8.4.2020	NEGATIF				NEGATIF
hs85	hs85	48	18/4/1973	Melayu	Male	Citizen	LOT 883, JALAN KG KUANTAN, BTG KALI	3.468	101.677		Selangor						SOSIAL					19.03.2020		NEGATIF				NEGATIF
hs850	hs850	11	19/5/2010	Melayu	Male	Citizen	N-G-05, Apartment Dahlia, Taman Bunga Raya, Bukit Beruntung 48300 Rawang	3.43757	101.548		Selangor				NO		PENGASUH			DAERAH	6.4.2020	1.4.2020	6.4.2020	NEGATIF				NEGATIF
hs851	hs851	5	19/12/2015	Melayu	Male	Citizen	G-12-3A, Apartment Dahlia TBR, Bukit Beruntung	3.43071	101.562		Selangor				NO		PENGASUH			DAERAH	11.4.2020	10.4.2020	12.4.2020	NEGATIF				NEGATIF
hs852	hs852	8	31/1/2013	Melayu	Female	Citizen	G-12-3A, Apartment Dahlia TBR, Bukit Beruntung	3.43071	101.562		Selangor				NO		PENGASUH			DAERAH	11.4.2020	10.4.2020	12.4.2020	NEGATIF				NEGATIF
hs853	hs853	16	18/1/2005	Melayu	Female	Citizen	N-G-05, Apartment Dahlia, Taman Bunga Raya, Bukit Beruntung 48300 Rawang	3.43757	101.548		Selangor				NO		PENGASUH			DAERAH	11.4.2020	10.4.2020	12.4.2020	NEGATIF				NEGATIF
hs854	hs854	14	2007-07-04	Melayu	Female	Citizen	N-G-05, Apartment Dahlia, Taman Bunga Raya, Bukit Beruntung 48300 Rawang	3.43757	101.548		Selangor				NO		PENGASUH			DAERAH	11.4.2020	10.4.2020	12.4.2020	NEGATIF				NEGATIF
hs855	hs855	24	25/6/1997	Melayu	Male	Citizen	N-G-05, Apartment Dahlia, Taman Bunga Raya, Bukit Beruntung 48300 Rawang	3.43757	101.548		Selangor				NO		PENGASUH			DAERAH	11.4.2020	10.4.2020	12.4.2020	NEGATIF				NEGATIF
hs856	hs856	50	1971-09-08	Melayu	Female	Citizen	N-G-05, Apartment Dahlia, Taman Bunga Raya, Bukit Beruntung 48300 Rawang	3.43757	101.548		Selangor				NO		PENGASUH			DAERAH	11.4.2020	10.4.2020	12.4.2020	NEGATIF				NEGATIF
hs857	hs857	9	29/9/2012	Melayu	Male	Citizen	No.5, Jalan Melor 8J, Taman Desa Melor, Serendah	3.35936	101.631		Selangor				YES		PENGASUH			DAERAH	11.4.2020	10.4.2020	12.4.2020	NEGATIF				NEGATIF
hs858	hs858	3	2018-10-01	Melayu	Male	Citizen	No.5, Jalan Melor 8J, Taman Desa Melor, Serendah	3.35936	101.631		Selangor				NO		PENGASUH			DAERAH	11.4.2020	10.4.2020	12.4.2020	NEGATIF				NEGATIF
hs859	hs859	7	2014-12-05	Melayu	Female	Citizen	F-A-17, Apartment Dahlia TBR, Bukit Beruntung	3.43071	101.562		Selangor				NO		KELUARGA			DAERAH	11.4.2020	10.4.2020	12.4.2020	NEGATIF				NEGATIF
hs86	hs86	49	17/10/1972	Melayu	Male	Citizen	SURAU YAKINIAH KG GENTING MALEK BTG KALI	3.46661	101.662		Selangor						SOSIAL					19.03.2020		NEGATIF				NEGATIF
hs860	hs860	12	2009-12-04	Melayu	Male	Citizen	No.5, Jalan Melor 8J, Taman Desa Melor, Serendah	3.35936	101.631		Selangor				YES		PENGASUH			DAERAH	11.4.2020	10.4.2020	12.4.2020	NEGATIF				NEGATIF
hs861	hs861	35	29/5/1986	Melayu	Female	Citizen	No.5, Jalan Melor 8J, Taman Desa Melor, Serendah	3.35936	101.631		Selangor				YES		PENGASUH			DAERAH	11.4.2020	10.4.2020	12.4.2020	NEGATIF				NEGATIF
hs862	hs862	9	28/6/2012	Melayu	Male	Citizen	F-A-17, Apartment Dahlia TBR, Bukit Beruntung	3.43071	101.562		Selangor				NO		KELUARGA			DAERAH	11.4.2020	10.4.2020	12.4.2020	NEGATIF				NEGATIF
hs863	hs863	38	20/8/1983	Melayu	Male	Citizen	F-A-17, Apartment Dahlia TBR, Bukit Beruntung	3.43071	101.562		Selangor				NO		KELUARGA			DAERAH	11.4.2020	10.4.2020	12.4.2020	NEGATIF				NEGATIF
hs864	hs864	13	24/10/2008	Melayu	Female	Citizen	F-A-17, Apartment Dahlia TBR, Bukit Beruntung	3.43071	101.562		Selangor				NO		KELUARGA			DAERAH	11.4.2020	10.4.2020	12.4.2020	NEGATIF				NEGATIF
hs865	hs865	35	14/4/1986	Melayu	Female	Citizen	B-1-6, Apartment Cempaka TBR, Bukit Beruntung	3.43794	101.548		Selangor				NO		SEKOLAH			DAERAH	11.4.2020	10.4.2020	12.4.2020	NEGATIF				NEGATIF
hs866	hs866	9	31/5/2012	Melayu	Male	Citizen	B-1-09, Apartment Dahlia TBR, Bukit Beruntung				Selangor						SEKOLAH			DAERAH	11.4.2020	10.4.2020	12.4.2020	NEGATIF				NEGATIF
hs867	hs867	9	17/7/2012	Melayu	Male	Citizen	No.4, Jalan Melor 4B, Bukit Beruntung	3.43203	101.565		Selangor						SEKOLAH			DAERAH	11.4.2020	10.4.2020	12.4.2020	NEGATIF				NEGATIF
hs868	hs868	10	24/2/2011	Melayu	Male	Citizen	No.13, Jalan Tulip 1, Bukit Sentosa	3.39742	101.563		Selangor						SEKOLAH			DAERAH	11.4.2020	10.4.2020	12.4.2020	NEGATIF				NEGATIF
hs869	hs869	9	18/2/2012	Melayu	Male	Citizen	M-2-42, Apartment Kenanga TBR, Bukit Beruntung	3.42439	101.557		Selangor						SEKOLAH			DAERAH	11.4.2020	10.4.2020	12.4.2020	NEGATIF				NEGATIF
hs87	hs87	45	17/7/1976	Melayu	Male	Citizen	NO 33B, KG GENTING MALIK, BTG KALI	3.46668	101.669		Selangor						SOSIAL					19.03.2020		NEGATIF				NEGATIF
hs870	hs870	13	2008-03-06	Melayu	Male	Citizen	No.33, Jalan Melor 5, Bukit Beruntung	3.43319	101.566		Selangor						SEKOLAH			DAERAH	11.4.2020	10.4.2020	12.4.2020	NEGATIF				NEGATIF
hs871	hs871	10	19/6/2011	Melayu	Female	Citizen	No.33, Jalan Melor 5, Bukit Beruntung	3.43319	101.566		Selangor						SEKOLAH			DAERAH	11.4.2020	10.4.2020	12.4.2020	NEGATIF				NEGATIF
hs872	hs872	9	17/5/2012	Melayu	Female	Citizen	E-1-23, Apartment Dahlia TBR, Bukit Beruntung	3.43071	101.562		Selangor						SEKOLAH			DAERAH	11.4.2020	10.4.2020	12.4.2020	NEGATIF				NEGATIF
hs873	hs873	9	24/1/2012	Melayu	Female	Citizen	No.32, Jalan Adenium 6A, Bukit Beruntung	3.42323	101.554		Selangor						SEKOLAH			DAERAH	11.4.2020	10.4.2020	12.4.2020	NEGATIF				NEGATIF
hs874	hs874	63	27/5/1958	Melayu	Male	Citizen	No.1, Jalan Cempakasari, Bdr Sg Buaya	3.37459	101.529		Selangor						SEKOLAH			DAERAH	14.4.2020	13.4.2020	15.4.2020	NEGATIF				NEGATIF
hs875	hs875	38	24/3/1983	Melayu	Female	Citizen	F-1-17 APT DAHLIA, TAMAN BUNGA RAYA, BUKIT BERUNTUNG	3.43757	101.548		Selangor				NO		KELUARGA			DAERAH	18.6.2020	4.6.2020	4.6.2020	NEGATIF				NEGATIF
hs876	hs876	18	18/4/2003	Melayu	Male	Citizen	N-G-05, Apartment Dahlia, Taman Bunga Raya	3.43757	101.548		Selangor				NO		PENGASUH							NEGATIF				NEGATIF
hs877	hs877	10	23/7/2011	Melayu	Male	Citizen	No 8 Jalan Semarak 2b Bb7 Bukit Beruntung 48300 Rawang	3.41662	101.566		Selangor						SEKOLAH					1.4.2020	6.4.2020	NEGATIF				NEGATIF
hs878	hs878	10	23/1/2011	Melayu	Male	Citizen	J-2-3 Apartment Cempaka Taman Bunga Raya Bukit Beruntung 48300 Rawang	3.43794	101.548		Selangor						SEKOLAH					1.4.2020	7.4.2020	NEGATIF				NEGATIF
hs879	hs879	10	29/9/2011	Melayu	Male	Citizen	C-Lg-12 Blok C Apt Dahlia Taman Bunga Raya Bukit Beruntung 48300 Rawang	3.43799	101.551		Selangor						SEKOLAH					1.4.2020	4.4.2020	NEGATIF				NEGATIF
hs88	hs88	33	1988-03-06	Melayu	Female	Citizen	KK UYB (HCW KLIA)	2.74175	101.702		Selangor						SOSIAL					19.03.2020		NEGATIF				NEGATIF
hs880	hs880	10	2011-03-03	Melayu	Male	Citizen	No 1, Jalan Inai 6a Bandar Bukit Beruntung Bukit Beruntung 48300 Rawang	3.42986	101.559		Selangor						SEKOLAH					1.4.2020	9.4.2020	NEGATIF				NEGATIF
hs881	hs881	10	20/4/2011	Melayu	Female	Citizen	No 21 Jalan 1a/6 Telipot Azura Bukit Sentosa, 48300 Rawang	3.40826	101.595		Selangor						SEKOLAH					1.4.2020	4.4.2020	NEGATIF				NEGATIF
hs882	hs882	10	2011-10-01	Melayu	Female	Citizen	N-G-07 Apartment Dahlia Jalan Bunga Raya 1 Taman Bunga Raya 48300 Rawang	3.43757	101.548		Selangor						SEKOLAH					1.4.2020	7.4.2020	NEGATIF				NEGATIF
hs883	hs883	10	20/8/2011	Melayu	Female	Citizen	L-Lg-09 Apt Dahlia Tmn Bunga Raya Bukit Beruntung 48300 Rawang	3.43757	101.548		Selangor						SEKOLAH					1.4.2020	2.4.2020	NEGATIF				NEGATIF
hs884	hs884	10	21/3/2011	Melayu	Female	Citizen	No 16 Jalan Cempaka 1c/1 Seksyen Bs 2 Bukit Sentosa 48300 Rawang	3.40349	101.562		Selangor						SEKOLAH					1.4.2020	7.4.2020	NEGATIF				NEGATIF
hs885	hs885	24	16/3/1997	Melayu	Female	Citizen	N-2-37, Apartment Kenanga TBR, Bukit Beruntung	3.44077	101.552		Selangor						KELUARGA			DAERAH	10.4.2020	9.4.2020	11.4.2020	NEGATIF				NEGATIF
hs886	hs886	21	2000-08-05	Melayu	Female	Citizen	N-2-37, Apartment Kenanga TBR, Bukit Beruntung	3.44077	101.552		Selangor						KELUARGA			DAERAH	10.4.2020	9.4.2020	11.4.2020	NEGATIF				NEGATIF
hs887	hs887	26	14/11/1995	Melayu	Female	Citizen	N-2-37, Apartment Kenanga TBR, Bukit Beruntung	3.44077	101.552		Selangor						KELUARGA			DAERAH	10.4.2020	9.4.2020	11.4.2020	NEGATIF				NEGATIF
hs888	hs888	57	15/7/1964	Melayu	Male	Citizen	N-2-37, Apartment Kenanga TBR, Bukit Beruntung	3.44077	101.552		Selangor				NO		KELUARGA			DAERAH	10.4.2020	9.4.2020	11.4.2020	NEGATIF				NEGATIF
hs889	hs889	18	21/4/2003	Melayu	Female	Citizen	N-2-37, Apartment Kenanga TBR, Bukit Beruntung	3.44077	101.552		Selangor						KELUARGA			DAERAH	10.4.2020	9.4.2020	11.4.2020	NEGATIF				NEGATIF
hs89	hs89	70	1951-11-09	Cina	Female	Citizen	116, Kg Air Panas Kerling, 44100 Kerling	3.59692	101.614		Selangor									DAERAH	23.3.2020	24.3.2020	1.4.2020	NEGATIF				NEGATIF
hs890	hs890	11	26/4/2010	Melayu	Male	Citizen	N-3-15, Apartment Kenanga TBR, Bukit Beruntung	3.43349	101.564		Selangor						RAKAN			DAERAH	17.4.2020	16.4.2020	17.4.2020	NEGATIF				NEGATIF
hs891	hs891	6	17/7/2015	Melayu	Female	Citizen	N-3-15, Apartment Kenanga TBR, Bukit Beruntung	3.43349	101.564		Selangor						RAKAN			DAERAH	17.4.2020	16.4.2020	17.4.2020	NEGATIF				NEGATIF
hs892	hs892	51	18/6/1970	Melayu	Female	Citizen	Blok N-2-37 Apartment Kenanga Jalan Persiaran Bunga Raya Bukit Beruntung Rawang	3.43589	101.544		Selangor				NO		KELUARGA			DAERAH	8.4.2020	8.4.2020	11.4.2020	NEGATIF				NEGATIF
hs893	hs893	12	2009-08-06	Melayu	Female	Citizen	A-2-3, Apartment Kemuning TBR, Bukit Beruntung	3.42439	101.557		Selangor						SEKOLAH			DAERAH	14.4.2020	14.4.2020	15.4.2020	NEGATIF				NEGATIF
hs894	hs894	12	29/7/2009	Melayu	Female	Citizen	L-2-06, Apartment Dahlia TBR, Bukit Beruntung	3.43071	101.562		Selangor						SEKOLAH			DAERAH	15.4.2020	14.4.2020	16.4.2020	NEGATIF				NEGATIF
hs895	hs895	12	2009-12-02	Melayu	Female	Citizen	A-1-01, Apartment Kemuning TBR, Bukit Beruntung	3.44477	101.553		Selangor						SEKOLAH			DAERAH	15.4.2020	14.4.2020	16.4.2020	NEGATIF				NEGATIF
hs896	hs896	12	2009-09-06	Melayu	Female	Citizen	Q-1-20, Apartment Dahlia TBR, Bukit Beruntung	3.43071	101.562		Selangor						SEKOLAH			DAERAH	15.4.2020	14.4.2020	16.4.2020	NEGATIF				NEGATIF
hs897	hs897	12	2009-08-04	Melayu	Female	Citizen	F-3A-10, Apartment Kemuning TBR, Bukit Beruntung	3.44477	101.553		Selangor						SEKOLAH			DAERAH	15.4.2020	14.4.2020	16.4.2020	NEGATIF				NEGATIF
hs898	hs898	12	2009-05-04	Melayu	Female	Citizen	H-G-66, Apartment Teratai TBR, Bukit Beruntung	3.44452	101.554		Selangor						SEKOLAH			DAERAH	15.4.2020	14.4.2020	16.4.2020	NEGATIF				NEGATIF
hs899	hs899	12	15/5/2009	Melayu	Male	Citizen	E-4-3, Apartment Mawar TBR, Bukit Beruntung	3.44466	101.546		Selangor						SEKOLAH			DAERAH	15.4.2020	14.4.2020	16.4.2020	NEGATIF				NEGATIF
hs9	hs9	35	1986-11-02	Melayu	Male	Citizen	A1-1, Kuarters Kerajaan, Klinik Kesihatan Serendah, Selangor	3.36233	101.603		Selangor			PEMBANTU PERUBATAN SERENDAH	YES		PEMBANTU PERUBATAN SERENDAH			DAERAH	05.03.2021	2020-06-03	2020-08-03	NEGATIF				NEGATIF
hs90	hs90	47	1974-04-08	Melayu	Female	Citizen	No. 3 Jalan Cempaka 3 Bukit Beruntung Golf 48300 Rawang	3.4341	101.556		Selangor									DAERAH	23.3.2020	24.3.2020	25.3.2020	NEGATIF				NEGATIF
hs900	hs900	12	24/4/2009	Melayu	Male	Citizen	No.6, Jalan Adenium 3A/2, Bukit Beruntung	3.41865	101.553		Selangor						SEKOLAH			DAERAH	15.4.2020	14.4.2020	16.4.2020	NEGATIF				NEGATIF
hs901	hs901	12	2009-10-05	Melayu	Male	Citizen	F-3-13, Apartment Kemuning TBR, Bukit Beruntung	3.42439	101.557		Selangor						SEKOLAH			DAERAH	15.4.2020	14.4.2020	16.4.2020	NEGATIF				NEGATIF
hs902	hs902	11	2009-08-12	Melayu	Male	Citizen	J-2-6, Apartment Anggerik TBR, Bukit Beruntung	3.44619	101.548		Selangor						SEKOLAH			DAERAH	15.4.2020	14.4.2020	16.4.2020	NEGATIF				NEGATIF
hs903	hs903	12	2009-08-06	Melayu	Female	Citizen	E-3-9, Apartment Kemuning TBR, Bukit Beruntung	3.44477	101.553		Selangor						SEKOLAH			DAERAH	15.4.2020	14.4.2020	16.4.2020	NEGATIF				NEGATIF
hs904	hs904	12	18/5/2009	Melayu	Female	Citizen	J-LG-01, Apartment Dahlia TBR, Bukit Beruntung	3.43071	101.562		Selangor						SEKOLAH			DAERAH	15.4.2020	14.4.2020	16.4.2020	NEGATIF				NEGATIF
hs905	hs905	12	2009-11-03	Melayu	Female	Citizen	A-G-21, Apartment Anggerik TBR, Bukit Beruntung	3.44636	101.547		Selangor						SEKOLAH			DAERAH	15.4.2020	14.4.2020	16.4.2020	NEGATIF				NEGATIF
hs906	hs906	12	24/10/2009	Melayu	Female	Citizen	L-G-23, Apartment Dahlia TBR, Bukit Beruntung	3.43071	101.562		Selangor						SEKOLAH			DAERAH	15.4.2020	14.4.2020	16.4.2020	NEGATIF				NEGATIF
hs907	hs907	12	25/4/2009	Melayu	Female	Citizen	B-2-18, Apartment Kenanga TBR, Bukit Beruntung	3.44077	101.552		Selangor						SEKOLAH			DAERAH	15.4.2020	14.4.2020	16.4.2020	NEGATIF				NEGATIF
hs908	hs908	12	2009-02-02	Melayu	Female	Citizen	J-3-15, Apartment Anggerik TBR, Bukit Beruntung	3.44619	101.548		Selangor						SEKOLAH			DAERAH	15.4.2020	14.4.2020	16.4.2020	NEGATIF				NEGATIF
hs909	hs909	12	27/3/2009	Melayu	Female	Citizen	C-2-03, Apartment Ceempaka, TBR, Bukit Beruntung	3.43891	101.547		Selangor						SEKOLAH			DAERAH	15.4.2020	14.4.2020	16.4.2020	NEGATIF				NEGATIF
hs91	hs91	28	15/7/1993	Melayu	Female	Citizen	No L-1-68 Apt Teratai Tmn Bunga Raya 3 Bukit Beruntung	3.44489	101.552		Selangor									DAERAH	23.3.2020	24.3.2020	25.3.2020	NEGATIF				NEGATIF
hs910	hs910	12	2009-01-10	Melayu	Female	Citizen	A-1-21, Apartment Teratai TBR, Bukit Beruntung	3.44452	101.554		Selangor						SEKOLAH			DAERAH	15.4.2020	14.4.2020	16.4.2020	NEGATIF				NEGATIF
hs911	hs911	12	29/9/2009	Melayu	Female	Citizen	R-1-10, Apartment Dahlia TBR, Bukit Beruntung				Selangor						SEKOLAH			DAERAH	15.4.2020	14.4.2020	16.4.2020	NEGATIF				NEGATIF
hs912	hs912	12	2009-07-01	Melayu	Female	Citizen	K-2-27, Apartment Anggerik TBR, Bukit Beruntung	3.44619	101.548		Selangor						SEKOLAH			DAERAH	15.4.2020	14.4.2020	16.4.2020	NEGATIF				NEGATIF
hs913	hs913	12	2009-02-12	Melayu	Female	Citizen	N-1-44, Apartment Kenanga TBR, Bukit Beruntung	3.43873	101.546		Selangor						SEKOLAH			DAERAH	15.4.2020	14.4.2020	16.4.2020	NEGATIF				NEGATIF
hs914	hs914	12	13/11/2009	Melayu	Male	Citizen	No.42, Jalan Inai 4, Bukit Beruntung	3.43057	101.559		Selangor						SEKOLAH			DAERAH	15.4.2020	14.4.2020	16.4.2020	NEGATIF				NEGATIF
hs915	hs915	10	2011-05-02	Melayu	Male	Citizen					Selangor						RAKAN							NEGATIF				NEGATIF
hs916	hs916	42	1979-10-10	Melayu	Female	Citizen	P-2-6, Apartment Dahlia TBR, Bukit Beruntung				Selangor									DAERAH	10.4.2020	9.4.2020	11.4.2020	NEGATIF				NEGATIF
hs917	hs917	17	27/12/2003	Melayu	Male	Citizen	Q-2-11, Apartment Dahlia TBR, Bukit Beruntung	3.43071	101.562		Selangor				YES		KELUARGA			DAERAH	10.4.2020	9.4.2020	11.4.2020	NEGATIF				NEGATIF
hs918	hs918	45	14/10/1976	Melayu	Male	Citizen	Q-2-11, Apartment Dahlia TBR, Bukit Beruntung	3.43071	101.562		Selangor				NO		KELUARGA			DAERAH	10.4.2020	9.4.2020	11.4.2020	NEGATIF				NEGATIF
hs919	hs919	18	21/12/2002	Melayu	Female	Citizen	Q-2-11, Apartment Dahlia TBR, Bukit Beruntung	3.43071	101.562		Selangor				NO		KELUARGA			DAERAH	10.4.2020	9.4.2020	11.4.2020	NEGATIF				NEGATIF
hs92	hs92	41	14/6/1980	India	Male	Citizen	No. 4 Jalan 3, Taman Garing Jaya, 48000 Rawang	3.30451	101.577		Selangor									DAERAH	23.3.2020	24.3.2020	25.3.2020	NEGATIF				NEGATIF
hs920	hs920	46	1974-12-12	Melayu	Female	Citizen	Q-2-11, Apartment Dahlia TBR, Bukit Beruntung	3.43071	101.562		Selangor				NO		KELUARGA			DAERAH	18.4.2020	9.4.2020	12.4.2020	NEGATIF				NEGATIF
hs921	hs921	16	22/12/2004	Melayu	Male	Citizen	Q-2-9, Apartment Dahlia TBR, Bukit Beruntung	3.43071	101.562		Selangor						PENGASUH			DAERAH	10.4.2020	9.4.2020	11.4.2020	NEGATIF				NEGATIF
hs922	hs922	41	30/4/1980	Melayu	Male	Citizen	Q-2-9, Apartment Dahlia TBR, Bukit Beruntung	3.43071	101.562		Selangor				NO		PENGASUH			DAERAH	10.4.2020	9.4.2020	11.4.2020	NEGATIF				NEGATIF
hs923	hs923	14	20/1/2007	Melayu	Male	Citizen	Q-2-9, Apartment Dahlia TBR, Bukit Beruntung	3.43071	101.562		Selangor						PENGASUH			DAERAH	10.4.2020	9.4.2020	11.4.2020	NEGATIF				NEGATIF
hs924	hs924	43	19/3/1978	Melayu	Female	Citizen	Q-2-9, Apartment Dahlia TBR, Bukit Beruntung	3.43071	101.562		Selangor				NO		PENGASUH			DAERAH	10.4.2020	9.4.2020	11.4.2020	NEGATIF				NEGATIF
hs925	hs925	9	2012-01-11	Melayu	Female	Citizen	P-2-6, Apartment Dahlia TBR, Bukit Beruntung				Selangor						PENGASUH			DAERAH	10.4.2020	9.4.2020	11.4.2020	NEGATIF				NEGATIF
hs926	hs926	5	27/2/2016	Melayu	Male	Citizen	P-2-6, Apartment Dahlia TBR, Bukit Beruntung				Selangor						PENGASUH			DAERAH	10.4.2020	9.4.2020	11.4.2020	NEGATIF				NEGATIF
hs927	hs927	3	22/4/2018	Melayu	Female	Citizen	P-2-6, Apartment Dahlia TBR, Bukit Beruntung				Selangor						PENGASUH			DAERAH	10.4.2020	9.4.2020	11.4.2020	NEGATIF				NEGATIF
hs928	hs928	10	15/7/2011	Melayu	Male	Citizen	K-1-50, Apartment Teratai TBR, Bukit Beruntung	3.44452	101.554		Selangor						SEKOLAH			DAERAH	17.4.2020	16.4.2020	17.4.2020	NEGATIF				NEGATIF
hs929	hs929	10	16/2/2011	Melayu	Male	Citizen	E-3-35, Apartment Kemuning TBR, Bukit Beruntung	3.44477	101.553		Selangor									DAERAH	17.4.2020	16.4.2020	17.4.2020	NEGATIF				NEGATIF
hs93	hs93	24	17/5/1997	Melayu	Female	Citizen	No 87, Jalan Bakawali 2b/5, Bs 10 Bukit Sentosa 3, 48300 Rawang	3.42451	101.565		Selangor									DAERAH	23.3.2020	24.3.2020	25.3.2020	NEGATIF				NEGATIF
hs930	hs930	10	30/7/2011	Melayu	Female	Citizen	J-4-3A, Apartment Cempaka TBR, Bukit Beruntung	3.43794	101.548		Selangor									DAERAH	17.4.2020	16.4.2020	17.4.2020	NEGATIF				NEGATIF
hs931	hs931	10	22/8/2011	Melayu	Female	Citizen	A-1-01, Apartment Kemuning TBR, Bukit Beruntung	3.44477	101.553		Selangor									DAERAH	17.4.2020	16.4.2020	17.4.2020	NEGATIF				NEGATIF
hs932	hs932	10	16/1/2011	Melayu	Male	Citizen	A-G-01, Apartment Kemuning TBR, Bukit Beruntung	3.44477	101.553		Selangor									DAERAH	17.4.2020	16.4.2020	17.4.2020	NEGATIF				NEGATIF
hs933	hs933	10	19/2/2011	Melayu	Male	Citizen	F-G-21, Apartment Teratai TBR, Bukit Beruntung	3.44452	101.554		Selangor									DAERAH	17.4.2020	16.4.2020	17.4.2020	NEGATIF				NEGATIF
hs934	hs934	10	2011-03-09	Melayu	Male	Citizen	D-G-12, Apartment Mawar TBR, Bukit Beruntung	3.44466	101.546		Selangor									DAERAH	17.4.2020	16.4.2020	17.4.2020	NEGATIF				NEGATIF
hs935	hs935	10	20/7/2011	Melayu	Female	Citizen	M-G-38, Apartment Dahlia TBR, Bukit Beruntung	3.43071	101.562		Selangor									DAERAH	17.4.2020	16.4.2020	17.4.2020	NEGATIF				NEGATIF
hs936	hs936	10	2011-07-03	Melayu	Female	Citizen	K-2-21, Apartment Anggerik TBR, Bukit Beruntung	3.44077	101.552		Selangor									DAERAH	17.4.2020	16.4.2020	17.4.2020	NEGATIF				NEGATIF
hs937	hs937	8	2013-03-10	Melayu	Male	Citizen	C-3-24, Apartment Kenanga TBR, Bukit Berutnung	3.43873	101.546		Selangor									DAERAH	17.4.2020	16.4.2020	17.4.2020	NEGATIF				NEGATIF
hs938	hs938	8	15/10/2013	Melayu	Male	Citizen	B-2-13, Apartment Cempaka TBR, Bukit Beruntung	3.43794	101.548		Selangor									DAERAH	17.4.2020	16.4.2020	17.4.2020	NEGATIF				NEGATIF
hs939	hs939	10	30/11/2011	Melayu	Male	Citizen	P-2-11 APT DAHLIA TAMAN BUNGA RAYA BUKIT BERUNTUNG 48300, SELANGOR	3.43799	101.551		Selangor													NEGATIF				NEGATIF
hs94	hs94	22	23/12/1998	Melayu	Female	Citizen	SCE-3-07 Seri Cempaka Jln Cempaka 1c Bukit Sentosa 48300 Rawang	3.40225	101.561		Selangor									DAERAH	23.3.2020	24.3.2020	25.3.2020	NEGATIF				NEGATIF
hs940	hs940	10	2011-09-06	Melayu	Female	Citizen	A-3-12 Apartment Cempaka Taman Bunga Raya Bukit Beruntung 48300 Rawang	3.43794	101.548		Selangor											1.4.2020	6.4.2020	NEGATIF				NEGATIF
hs941	hs941	10	29/8/2011	Melayu	Male	Citizen	NO.55, JLN INAI 4, BKT BERUNTUNG, 48300 RAWANG, SELANGOR	3.43029	101.56		Selangor													NEGATIF				NEGATIF
hs942	hs942	10	20/1/2011	Melayu	Male	Citizen	C-1-7 APT ANGGERIK, TAMAN BUNGA RAYA BUKIT BERUNTUNG, 48300 RAWANG, SELANGOR	3.44636	101.547		Selangor													NEGATIF				NEGATIF
hs943	hs943	10	2011-01-03	Melayu	Male	Citizen	J-1-13A APT ANGGERIK, TAMAN BUNGA RAYA BUKIT BERUNTUNG, 48300 RAWANG, SELANGOR	3.44637	101.548		Selangor													NEGATIF				NEGATIF
hs944	hs944	10	23/3/2011	Melayu	Male	Citizen	B-G-05 APT DAHLIA, TAMAN BUNGA RAYA BUKIT BERUNTUNG, 48300 RAWANG, SELANGOR	3.43799	101.551		Selangor													NEGATIF				NEGATIF
hs945	hs945	10	22/8/2011	Melayu	Male	Citizen	No. 7, Jalan Anggerik 1a, Seksyen Bb4 Bukit Beruntung 48300 Rawang	3.42429	101.565		Selangor											1.4.2020	7.4.2020	NEGATIF				NEGATIF
hs946	hs946	10	18/2/2011	Melayu	Male	Citizen	L-1-1 APARTMENT KENANGA, TAMAN BUNGA RAYA BUKIT BERUNTUNG, 48300 RAWANG, SELANGOR	3.43799	101.551		Selangor													NEGATIF				NEGATIF
hs947	hs947	10	2011-03-06	Melayu	Male	Citizen	K-2-16,Apartment Dahlia Taman Bunga Raya Bukit Beruntung 48300 Rawang	3.43757	101.548		Selangor											1.4.2020	7.4.2020	NEGATIF				NEGATIF
hs948	hs948	10	2011-06-10	Melayu	Male	Citizen	Q-Lg-07, Apt Dahlia Taman Bunga Raya 48300 Rawang	3.43757	101.548		Selangor											1.4.2020	2.4.2020	NEGATIF				NEGATIF
hs949	hs949	10	13/1/2011	Melayu	Female	Citizen	F-3-23 APT ANGGERIK JLN BUNGA RAYA 2 TAMAN BUNGA RAYA BUKIT BERUNTUNG 48300, SELANGOR	3.40132	101.561		Selangor													NEGATIF				NEGATIF
hs95	hs95	31	1990-09-06	Melayu	Female	Citizen	No 25 Jln Anggerik 3d/4 Bukit Sentosa Rawang	3.41896	101.587		Selangor									DAERAH	23.3.2020	24.3.2020	25.3.2020	NEGATIF				NEGATIF
hs950	hs950	10	16/4/2011	Melayu	Female	Citizen	B-4-20 APT KENANGA, TAMAN BUNGA RAYA BUKIT BERUNTUNG, 48300 RAWANG, SELANGOR	3.43799	101.551		Selangor													NEGATIF				NEGATIF
hs951	hs951	10	14/10/2011	Melayu	Female	Citizen	P-2-26 Apartment Dahlia, Jalan Taman Bunga Raya 1, Taman Bunga Raya, 48300 Bukit Beruntung	3.43757	101.548		Selangor											1.4.2020	2.4.2020	NEGATIF				NEGATIF
hs952	hs952	10	23/5/2011	Melayu	Female	Citizen	H-G-08 APT CEMPAKA, TAMAN BUNGA RAYA BUKIT BERUNTUNG, 48300 RAWANG, SELANGOR	3.43939	101.55		Selangor													NEGATIF				NEGATIF
hs953	hs953	10	2011-12-10	Melayu	Female	Citizen	M-G 23A APARTMENT DAHLIA TAMAN BUNGA RAYA BUKIT BERUNTUNG 48300, SELANGOR	3.43757	101.548		Selangor													NEGATIF				NEGATIF
hs954	hs954			Melayu	Female	Citizen	M-G-29 APT DAHLIA TAMAN BUNGA RAYA BUKIT BERUNTUNG 48300, SELANGOR	3.43799	101.551		Selangor													NEGATIF				NEGATIF
hs955	hs955	58	20/10/1963	Melayu	Male	Citizen	No.55, Jalan Kemboja 4A/1, Bukit Sentosa	3.41712	101.594		Selangor									TABLIGH	10.4.2020	9.4.2020	11.4.2020	NEGATIF				NEGATIF
hs956	hs956	59	23/9/1962	Melayu	Female	Citizen	No.5, Jalan Kemboja 4A/4, Bukit Sentosa	3.41705	101.593		Selangor			HOUSEWIFE	NO		KELUARGA			TABLIGH	10.4.2020	9.4.2020	11.4.2020	NEGATIF				NEGATIF
hs957	hs957	20	20/9/2001	Melayu	Male	Citizen	No.5, Jalan Kemboja 4A/4, Bukit Sentosa	3.41705	101.593		Selangor			IPG GAYA KOTA KINABALU	YES		KELUARGA			TABLIGH	10.4.2020	9.4.2020	11.4.2020	NEGATIF				NEGATIF
hs958	hs958	30	27/10/1991	Melayu	Male	Citizen	No.13, Jalan Kemboja 4A/1, Bukti Sentosa	3.41712	101.594		Selangor			SK BUKIT BERUNTUNG 1	NO		KELUARGA			TABLIGH	10.4.2020	9.4.2020	11.4.2020	NEGATIF				NEGATIF
hs959	hs959	25	15/8/1996	Melayu	Female	Citizen	No.13, Jalan Kemboja 4A/1, Bukti Sentosa	3.41712	101.594		Selangor			SK BUKIT SENTOSA	NO		KELUARGA			TABLIGH	10.4.2020	9.4.2020	11.4.2020	NEGATIF				NEGATIF
hs96	hs96	34	1987-01-11	Melayu	Female	Citizen	No 88 Jalan Tulip 2, Bukit Sentosa 48300 Bukit Sentosa	3.39705	101.563		Selangor									DAERAH	23.3.2020	24.3.2020	25.3.2020	NEGATIF				NEGATIF
hs960	hs960	25	15/8/1996	Melayu	Female	Citizen	No.13, Jalan Kemboja 4A/1, Bukti Sentosa	3.41712	101.594		Selangor			BABY	NO		KELUARGA			TABLIGH	10.4.2020	9.4.2020	11.4.2020	NEGATIF				NEGATIF
hs962	hs962	26	14/7/1995	Melayu	Female	Citizen	5 Jalan Kemboja 4A/4 Sek Bs 8 Bukit Sentosa 3 Rawang	3.41452	101.594		Selangor								16.4.2020	DAERAH		9.4.2020	11.4.2020	NEGATIF				NEGATIF
hs963	hs963	36	1985-07-09	Melayu	Male	Citizen	NO 74, TAMAN SRI GERSIK 84700 TANGKAK JOHOR	1.81763	103.474		Selangor			SK SENGKANG GRESIK, TANGKAK	NO		KELUARGA							NEGATIF				NEGATIF
hs964	hs964	32	1989-01-01	Melayu	Female	Citizen	NO 74, TAMAN SRI GERSIK 84700 TANGKAK JOHOR	1.81763	103.474		Selangor				NO		KELUARGA							NEGATIF				NEGATIF
hs965	hs965	8	2013-05-09	Melayu	Female	Citizen	NO 74, TAMAN SRI GERSIK 84700 TANGKAK JOHOR	1.81763	103.474		Selangor				NO		KELUARGA							NEGATIF				NEGATIF
hs966	hs966	6	2015-05-12	Melayu	Male	Citizen	NO 74, TAMAN SRI GERSIK 84700 TANGKAK JOHOR	1.81763	103.474		Selangor				NO		KELUARGA							NEGATIF				NEGATIF
hs967	hs967	2	14/11/2019	Melayu	Female	Citizen	NO 74, TAMAN SRI GERSIK 84700 TANGKAK JOHOR	1.81763	103.474		Selangor				NO		KELUARGA							NEGATIF				NEGATIF
hs968	hs968	33	31/5/1988	Melayu	Male	Citizen	NO 3, JALAN UDA UTAMA 5/18, BANDAR UDA UTAMA 81200 JOHOR BAHRU, JOHOR	1.49398	103.661		Selangor				NO		KELUARGA							NEGATIF				NEGATIF
hs969	hs969	4	2017-07-06	Melayu	Male	Citizen	NO 3, JALAN UDA UTAMA 5/18, BANDAR UDA UTAMA 81200 JOHOR BAHRU, JOHOR	1.49398	103.661		Selangor				NO		KELUARGA							NEGATIF				NEGATIF
hs97	hs97	47	17/3/1974	Melayu	Male	Citizen	No. 6 Jln Biu 1, Tmn Bukit Indah 47000 Sg Buloh	3.23179	101.57		Selangor									DAERAH	23.3.2020	24.3.2020	25.3.2020	NEGATIF				NEGATIF
hs970	hs970	33	1988-11-11	Melayu	Female	Citizen	NO 3, JALAN UDA UTAMA 5/18, BANDAR UDA UTAMA 81200 JOHOR BAHRU, JOHOR	1.49398	103.661		Selangor				NO		KELUARGA							NEGATIF				NEGATIF
hs971	hs971	26	14/7/1995	Melayu	Female	Citizen	A-20-7, PV20 Platinum Lake Condo, No 5, Jalan Usahawan, off, Jalan Genting Kelang, Setapak, 53300 KL	3.19903	101.721		Selangor				NO		KELUARGA							NEGATIF				NEGATIF
hs972	hs972	32	1989-08-01	Melayu	Female	Citizen	A-17-07, Block A, Ascotte Boulevard, Jalan Bandar Rinching 5/6, Bandar Rinching, 43500 Semenyih Selangor.	2.9243	101.861		Selangor				NO		SAUDARA	14.03.2021						NEGATIF				NEGATIF
hs973	hs973	31	29/6/1990	Melayu	Male	Citizen	A-17-07, Block A, Ascotte Boulevard, Jalan Bandar Rinching 5/6, Bandar Rinching, 43500 Semenyih Selangor.	2.9243	101.861		Selangor				NO		SAUDARA	14.03.2021						NEGATIF				NEGATIF
hs974	hs974	57	1964-06-12	Melayu	Male	Citizen	No 3 Jalan Mengkuang 2, Taman Seri Mengkuang 45000 Kuala Selangor.	3.368	101.258		Selangor						SAUDARA	14.03.2021						NEGATIF				NEGATIF
hs975	hs975	56	16/7/1965	Melayu	Female	Citizen	No 3 Jalan Mengkuang 2, Taman Seri Mengkuang 45000 Kuala Selangor.	3.368	101.258		Selangor						SAUDARA	14.03.2021						NEGATIF				NEGATIF
hs976	hs976	40	29/8/1981	Melayu	Female	Citizen	No 17, Jalan Seri Putra 2/3 K, Bandar Seri Putra, 43000 Kajang	2.8858	101.786		Selangor						SAUDARA	14.03.2021						NEGATIF				NEGATIF
hs977	hs977	40	1981-02-05	Melayu	Male	Citizen	No 17, Jalan Seri Putra 2/3 K, Bandar Seri Putra, 43000 Kajang	2.8858	101.786		Selangor						SAUDARA	14.03.2021						NEGATIF				NEGATIF
hs978	hs978	12	2009-08-05	Melayu	Female	Citizen	No 17, Jalan Seri Putra 2/3 K, Bandar Seri Putra, 43000 Kajang	2.8858	101.786		Selangor						SAUDARA	14.03.2021						NEGATIF				NEGATIF
hs979	hs979	9	23/3/2012	Melayu	Female	Citizen	No 17, Jalan Seri Putra 2/3 K, Bandar Seri Putra, 43000 Kajang	2.8858	101.786		Selangor						SAUDARA	14.03.2021						NEGATIF				NEGATIF
hs98	hs98	44	22/3/1977	Melayu	Male	Citizen	No 22 Jalan Kasturi 4c Bandar Bukit Beruntung 48300	3.40573	101.573		Selangor									DAERAH	23.3.2020	24.3.2020	25.3.2020	NEGATIF				NEGATIF
hs980	hs980	7	16/4/2014	Melayu	Male	Citizen	No 17, Jalan Seri Putra 2/3 K, Bandar Seri Putra, 43000 Kajang	2.8858	101.786		Selangor						SAUDARA	14.03.2021						NEGATIF				NEGATIF
hs981	hs981	37	21/9/1984	Melayu	Female	Citizen	Unit 401, Blok L15A, Flat Pandan Jaya, Persiaran Pandan 3, 55000, Kuala Lumpur	3.13365	101.743		Selangor						SAUDARA	14.03.2021						NEGATIF				NEGATIF
hs982	hs982	72	24/7/1949	Melayu	Male	Citizen	No 115931 Hala Pegoh 1, RPT Pengkalan Pegoh Seberang, 31500 Lahat, Perak	4.53609	101.078		Selangor						SAUDARA	14.03.2021						NEGATIF				NEGATIF
hs983	hs983	69	17/3/1952	Melayu	Female	Citizen	No 115931 Hala Pegoh 1, RPT Pengkalan Pegoh Seberang, 31500 Lahat, Perak	4.53609	101.078		Selangor						SAUDARA	14.03.2021						NEGATIF				NEGATIF
hs984	hs984	43	1978-04-02	Melayu	Female	Citizen	7353 Jalan Rubi Taman Setia 53100 Gombak Kuala Lumpur.	3.22552	101.718		Selangor						SAUDARA	14.03.2021						NEGATIF				NEGATIF
hs985	hs985	17	2004-11-03	Melayu	Male	Citizen	7353 Jalan Rubi Taman Setia 53100 Gombak Kuala Lumpur.	3.22552	101.718		Selangor						SAUDARA	14.03.2021						NEGATIF				NEGATIF
hs986	hs986	13	2008-05-05	Melayu	Female	Citizen	7353 Jalan Rubi Taman Setia 53100 Gombak Kuala Lumpur.	3.22552	101.718		Selangor						SAUDARA	14.03.2021						NEGATIF				NEGATIF
hs987	hs987	8	2013-04-10	Melayu	Female	Citizen	7353 Jalan Rubi Taman Setia 53100 Gombak Kuala Lumpur.	3.22552	101.718		Selangor						SAUDARA	14.03.2021						NEGATIF				NEGATIF
hs988	hs988	63	17/11/1958	Melayu	Male	Citizen	No. 6, Jln N3, Tmn Melawati, 53100 KL	3.20984	101.752		Selangor						ROMBONGAN	10.03.2021						NEGATIF				NEGATIF
hs989	hs989	62	1959-01-03	Melayu	Female	Citizen	No. 6, Jln N3, Tmn Melawati, 53100 KL	3.20984	101.752		Selangor						ROMBONGAN	10.03.2021						NEGATIF				NEGATIF
hs99	hs99	33	1988-07-04	Melayu	Male	Citizen	No. 37, Jalan Anggerik 4d/5, Seksyen Bb4, B.B / Sk Tbr1	3.41573	101.591		Selangor						SEKERJA			DAERAH	23.3.2020	22.3.2020	26.3.2020	NEGATIF				NEGATIF
hs990	hs990	67	20/10/1954	Melayu	Male	Citizen	No 11 Jalan JU7 Taman Jasa Utama 68100 Batu Caves	3.26978	101.682		Selangor						ROMBONGAN	10.03.2021						NEGATIF				NEGATIF
hs991	hs991	56	24/9/1965	Melayu	Male	Citizen	66 jalan kesuma 5/12, Bandar Tasik Kesuma 43700 Semenyih, Selangor	2.90889	101.871		Selangor						ROMBONGAN	10.03.2021						NEGATIF				NEGATIF
hs992	hs992	53	26/8/1968	Melayu	Female	Citizen	66 jalan kesuma 5/12, Bandar Tasik Kesuma 43700 Semenyih, Selangor	2.90889	101.871		Selangor						ROMBONGAN	10.03.2021						NEGATIF				NEGATIF
hs993	hs993	57	1964-08-07	Melayu	Female	Citizen	320-2, Kg Raja, Felda Gedangsa, Hulu Bernam	3.73558	101.382		Selangor				NO		SAUDARA			DAERAH	10.4.2020	9.4.2020	11.4.2020	NEGATIF				NEGATIF
hs994	hs994	28	23/10/1993	Melayu	Female	Citizen	320-2, Kg Raja, Felda Gedangsa, Hulu Bernam	3.73558	101.382		Selangor				NO		SAUDARA			DAERAH	10.4.2020	9.4.2020	11.4.2020	NEGATIF				NEGATIF
hs995	hs995	60	29/1/1961	Melayu	Male	Citizen	320-2, Kg Raja, Felda Gedangsa, Hulu Bernam	3.73558	101.382		Selangor				NO		SAUDARA			DAERAH	10.4.2020	9.4.2020	11.4.2020	NEGATIF				NEGATIF
hs996	hs996	16	16/10/2005	Melayu	Female	Citizen	320-2, Kg Raja, Felda Gedangsa, Hulu Bernam	3.73558	101.382		Selangor				NO		SAUDARA			DAERAH	10.4.2020	9.4.2020	11.4.2020	NEGATIF				NEGATIF
hs997	hs997	26	24/3/1995	Melayu	Female	Citizen	320-2, Kg Raja, Felda Gedangsa, Hulu Bernam	3.73558	101.382		Selangor				NO		SAUDARA			DAERAH	10.4.2020	9.4.2020	11.4.2020	NEGATIF				NEGATIF
hs998	hs998	25	14/8/1996	Melayu	Female	Citizen	L-4-30, Apartment Kenanga TBR, Bukit Beruntung	3.43873	101.546		Selangor				NO		KELUARGA			DAERAH	10.4.2020	9.4.2020	11.4.2020	NEGATIF				NEGATIF
hs999	hs999	42	1979-08-03	Melayu	Male	Citizen	No.320-2, Kampung Raja, Felda Gedangsa	3.73558	101.382		Selangor				NO		SAUDARA			DAERAH	11.4.2020	10.4.2020	12.4.2020	NEGATIF				NEGATIF
hs1614	hs1614	10	29/5/2011	Melayu	Male	Citizen	No 1 Jalang Songket 2B, Taman Desa Bukit Bujang	3.53559	101.656		Selangor				NO		JIRAN			TAHFIZ (KONTEK)	9.5.2020	8.5.2020	11.5.2020	NEGATIF				NEGATIF
