# Supplementary material for: Understanding the progress of COVID-19 transmission in a rural district: a social network approach
Source: PeerJ. 2024 Nov 28;12:e18571. doi: 10.7717/peerj.18571 (PMC11608564; doi:10.7717/peerj.18571)
Supplement: Supplemental Information 8 — Dataset comprised of the attributes of COVID-19 confirmed cases. The coordinate of the location was not included in this dataset since it is confidential. [file peerj-12-18571-s008.xlsx]

## Sheet: Sheet1
Id	Label	Age	Date of birth	Race	Gender	Citizen	Region	State	Occupation	Workplace address	Symptom status	Onset	Relation to case	Last contact	Infection status	Cluster	Notification date	Sampling date 1	Result date 1	Result 1	Sampling date 2	Result date 2	Result 2	Final result	age_category
HS001	HS001	50	700123-01-5606	Malay	Female	CITIZEN	Serendah	Selangor			PUI					UDA Holding		43892	43892	Positive				Positive	50-59
HS002	HS002	73	461213-01-5655	Malay	Male	CITIZEN	Batang Kali	Selangor								Seri Petaling Yakiniah		43902	43904	Positive				Positive	70-79
HS003	HS003	20	36501	Malay	Male	CITIZEN	Batang Kali	Selangor								Seri Petaling Yakiniah		43905		Positive				Positive	18-29
HS004	HS004	37		Foreigner	Male	NON-CITIZEN	Batu	Selangor					TABLIGH			Seri Petaling Yakiniah	15.3.2020	43905		Positive				Positive	30-39
HS005	HS005	55	23976	Malay	Female	CITIZEN	Serendah	Selangor								SK TBR 1	22.3.2020	22.3.2020	43912	Positive				Positive	50-59
HS006	HS006	59	21935	Malay	Male	CITIZEN	Serendah	Selangor								Seri Petaling_x000D_ Surau Jln Seroja	21.3.2020	21.3.2020	25.3.2020	Positive				Positive	50-59
HS007	HS007	25	35399	Malay	Female	CITIZEN	Serendah	Selangor								Kontak Zaitun	22.3.2020	22.3.2020	22.3.2020	Positive				Positive	18-29
HS008	HS008	19	37092	Malay	Female	CITIZEN	Serendah	Selangor								Kontak Zaitun	22.3.2020	22.3.2020	22.3.2020	Positive				Positive	18-29
HS009	HS009	53	24730	Malay	Male	CITIZEN	Ampang Pecah	Selangor								Seri Petaling_x000D_ Homestay Hulu Bernam	19.3.2020	19.3.2020	23.3.2020	Positive				Positive	50-59
HS010	HS010	60	22122	Malay	Male	CITIZEN	Serendah	Selangor								Kontak Zaitun	22.3.2020	22.3.2020	22.3.2020	Positive				Positive	60-69
HS011	HS011	58	22908	Malay	Male	CITIZEN	Serendah	Selangor								Seri Petaling	25.3.2020	25.3.2020	27.3.2020	Positive				Positive	50-59
HS012	HS012	22	35819	Malay	Male	CITIZEN	Serendah	Selangor								Sekolah Tahfiz Seri Petaling	25.3.2020	25.3.2020	27.3.2020	Positive				Positive	18-29
HS013	HS013	24	35250	Malay	Male	CITIZEN	Batang Kali	Selangor								Seri Petaling Yakiniah	19.3.2020	19.3.2020	21.3.2020	Positive				Positive	18-29
HS014	HS014	36	30679	Malay	Male	CITIZEN	Batang Kali	Selangor								Seri Petaling Yakiniah	19.3.2020	19.3.2020	21.3.2020	Positive				Positive	30-39
HS015	HS015	49	25955	Malay	Female	CITIZEN	Serendah	Selangor								Kontak Zaitun	23.3.2020	23.3.2020	27.3.2020	Positive				Positive	40-49
HS016	HS016	39	29768	Malay	Female	CITIZEN	Serendah	Selangor								Kontek Zaitun	25.3.2020	25.3.2020	28.3.2020	Positive				Positive	30-39
HS017	HS017	24	35090	Malay	Male	CITIZEN	Batang Kali	Selangor								Seri Petaling Yakiniah	27.3.2020	27.3.2020	31.3.2020	Positive				Positive	18-29
HS018	HS018	35		Foreigner	Male	NON-CITIZEN	Batang Kali	Selangor								Seri Petaling Yakiniah	27.3.2020	27.3.2020	31.3.2020	Positive				Positive	30-39
HS019	HS019	25	34767	Malay	Male	CITIZEN	Batang Kali	Selangor								Seri Petaling Yakiniah	27.3.2020	27.3.2020	31.3.2020	Positive				Positive	18-29
HS020	HS020	64	20583	Malay	Male	CITIZEN	Batang Kali	Selangor								Seri Petaling Yakiniah	27.3.2020	27.3.2020	31.3.2020	Positive				Positive	60-69
HS021	HS021	31	32655	Malay	Female	CITIZEN	Serendah	Selangor								Sg Buaya			30.3.2020	Positive				Positive	30-39
HS022	HS022	16	38028	Malay	Female	CITIZEN	Serendah	Selangor								MD. Rafiee	24.3.2020	24.3.2020	1.4.2020	Positive				Positive	13-17
HS023	HS023	67	19647	Malay	Male	CITIZEN	Kalumpang	Selangor									30.3.2020	30.3.2020	2.4.2020	Positive				Positive	60-69
HS024	HS024	53	24513	Malay	Female	CITIZEN	Serendah	Selangor								MD. Rafiee	24.3.2020	24.3.2020	1.4.2020	Positive				Positive	50-59
HS025	HS025	9	40851	Malay	Male	CITIZEN	Serendah	Selangor								Kontek Zaiton Abd Rahman	25.3.2020	25.3.2020	43923	Positive				Positive	5-12
HS026	HS026	55	23928	Malay	Female	CITIZEN	Serendah	Selangor								Kontak Ismail Hassan (Tabligh)	26.3.2020	26.3.2020	3.4.2020	Positive				Positive	50-59
HS027	HS027	24	35286	Malay	Female	CITIZEN	Serendah	Selangor								Kontak Ismail Hassan (Tabligh)	26.3.2021	26.3.2021	3.4.2020	Positive				Positive	18-29
HS028	HS028	13	39356	Malay	Female	CITIZEN	Serendah	Selangor								Kontak Ismail Hassan (Tabligh)	26.3.2021	26.3.2021	3.4.2020	Positive				Positive	13-17
HS029	HS029	46	27365	Malay	Male	CITIZEN	Hulu Bernam	Selangor								Seri Petaling_x000D_ Kontak Mustafa Kamal	26.3.2020	26.3.2020	4.4.2020	Positive				Positive	40-49
HS030	HS030	38	30182	Malay	Female	CITIZEN	Ampang Pecah	Selangor								IKBN	31.3.2020	31.3.2020	4.4.2020	Positive				Positive	30-39
HS031	HS031	56	23368	Malay	Male	CITIZEN	Batang Kali (Yakiniah)	Selangor								Seri Petaling Yakiniah	26.3.2020	26.3.2020	3.4.2020	Positive				Positive	50-59
HS032	HS032	32	32372	Malay	Male	CITIZEN	Batang Kali (Yakiniah)	Selangor								Seri Petaling Yakiniah	26.3.2020	26.3.2020	4.4.2020	Positive				Positive	30-39
HS033	HS033	20	36801	Malay	Male	CITIZEN	Serendah	Selangor								Kontak Ismail Hassan (Tabligh)	26.3.2021	26.3.2021	4.4.2020	Positive				Positive	18-29
HS034	HS034	37	30325	Malay	Male	CITIZEN	Batang Kali	Selangor								AS-SAJIDDIN	30.3.2020	30.3.2020	4.4.2020	Positive				Positive	30-39
HS035	HS035	46	27051	Malay	Male	CITIZEN	Batang Kali	Selangor								Elektirikal Bkt Jalil	31.3.2020	31.3.2020	4.4.2020	Positive				Positive	40-49
HS036	HS036	56	23408	Malay	Female	CITIZEN	Hulu Bernam	Selangor								London	31.3.2020	31.3.2020	6.4.2020	Positive				Positive	50-59
HS037	HS037	34	90/51/C4	Foreigner	Male	NON-CITIZEN	Batang Kali	Selangor								MADRASAH QURAN WA SUNNAH	24.3.2020	24.3.2020	31.3.2020	Positive				Positive	30-39
HS038	HS038	12	39682	Malay	Female	CITIZEN	Serendah	Selangor								SK TBR 1	1.4.2020	1.4.2020	7.4.2020	Positive				Positive	5-12
HS039	HS039	12	39659	Malay	Male	CITIZEN	Serendah	Selangor								SK TBR 1	1.4.2020	1.4.2020	7.4.2020	Positive				Positive	5-12
HS040	HS040	9	40582	Malay	Female	CITIZEN	Serendah	Selangor								SK TBR 1	1.4.2020	1.4.2020	7.4.2020	Positive				Positive	5-12
HS041	HS041	27	31/42/90	Malay	Male	CITIZEN	Serendah	Selangor								SK TBR 1	1.4.2020	1.4.2020	7.4.2020	Positive				Positive	18-29
HS042	HS042	9	40723	Malay	Male	CITIZEN	Serendah	Selangor								SK TBR 1	1.4.2020	1.4.2020	7.4.2020	Positive				Positive	5-12
HS043	HS043	61	21831	Malay	Male	CITIZEN	Serendah	Selangor								Surau Kemboja	31.3.2020	31.3.2020	7.4.2020	Positive				Positive	60-69
HS044	HS044	9	40855	Malay	Female	CITIZEN	Serendah	Selangor								SK TBR 1	1.4.2020	1.4.2020	7.4.2020	Positive				Positive	5-12
HS045	HS045	41	29101	Malay	Female	CITIZEN	Serendah	Selangor								SK TBR 1	1.4.2020	1.4.2020	9.4.2020	Positive				Positive	40-49
HS046	HS046	27	34218	Malay	Male	CITIZEN	Batang Kali	Selangor			YES	28.3.2020	TABLIGH	19.3.2020		MAAHAD AL MUSTHOFA	7.4.2020	8.4.2020	10.4.2020	Positive				Positive	18-29
HS047	HS047	7	41606	Malay	Female	CITIZEN	Serendah	Selangor								Kontek Kes Norhazah	14.4.2020	14.4.2020	16.4.2020	Positive				Positive	5-12
HS048	HS048	27	34220	Malay	Male	CITIZEN	Serendah	Selangor			YES	4.4.2020				HCW	10.4.2020	31.3.2020	11.4.2020	Positive				Positive	18-29
HS049	HS049	62	21242	Malay	Male	CITIZEN	Batang Kali	Selangor								Seri Petaling Yakiniah	3.4.2020	3.4.2020	9.4.2020	Positive				Positive	60-69
HS050	HS050	30	32887	Malay	Male	CITIZEN	Batang Kali	Selangor								Seri Petaling Yakiniah	3.3.2020	3.3.2020	9.4.2020	Positive				Positive	30-39
HS051	HS051	31	32662	Indian	Female	CITIZEN	Serendah	Selangor								kontek kes kaliappan	27.4.2020	27.4.2020	29.4.2020	Positive				Positive	30-39
HS052	HS052	14	38897	Malay	Female	CITIZEN	Ampang Pecah	Selangor								TAHFIZ DARUL QURAN	4.5.2020	4.5.2020	5.5.2020	Positive				Positive	13-17
HS053	HS053	58	22916	Malay	Male	CITIZEN	Ulu Yam	Selangor								TAHFIZ AL KHOLIDI	4.5.2020	4.5.2020	5.5.2020	Positive				Positive	50-59
HS054	HS054	14	38860	Malay	Male	CITIZEN	Serendah	Selangor								TAHFIZ DARUL MUQAMAH LITAHFIZIL QURAN ULU KALONG	6.5.2020	6.5.2020	9.5.2020	Positive				Positive	13-17
HS055	HS055	9	40835	Malay	Male	CITIZEN	Serendah	Selangor								TAHFIZ AL QURAN AL WALID	6.5.2020	6.5.2020	9.5.2020	Positive				Positive	5-12
HS056	HS056	21	36439	Malay	Male	CITIZEN	Rasa	Selangor								TAHFIZ DARUL ATIQ	6.5.2020	6.5.2020	9.5.2020	Positive				Positive	18-29
HS057	HS057	20	36523	Malay	Male	CITIZEN	Rasa	Selangor								TAHFIZ DARUL ATIQ	6.5.2020	6.5.2020	9.5.2020	Positive				Positive	18-29
HS058	HS058	17	37697	Malay	Male	CITIZEN	Serendah	Selangor								TAHFIZ IMAM AS SHAFIE	6.5.2020	6.5.2020	9.5.2020	Positive				Positive	13-17
HS059	HS059	14	38946	Malay	Male	CITIZEN	Rasa	Selangor								TAHFIZ DARUL ATIQ	6.5.2020	6.5.2020	9.5.2020	Positive				Positive	13-17
HS060	HS060	36	30969	Malay	Male	CITIZEN	Serendah	Selangor									18.5.2020	18.5.2020	19.5.2020	Positive				Positive	30-39
HS061	HS061	63	21047	Malay	Male	CITIZEN	Serendah	Selangor								mati	9.5.2020	9.5.2020	10.5.2020	Positive				Positive	60-69
HS062	HS062	49	25917	Malay	Male	CITIZEN	Ampang Pecah	Selangor								RUMAH EHSAN	18.5.2020	18.5.2020	19.5.2020	Positive				Positive	40-49
HS063	HS063	55	24079	Indian	Female	CITIZEN	Ampang Pecah	Selangor								RUMAH EHSAN	18.5.2020	18.5.2020	19.5.2020	Positive				Positive	50-59
HS064	HS064	20	36607	Orang Asli	Male	CITIZEN	Ampang Pecah	Selangor								RUMAH EHSAN	18.5.2020	18.5.2020	19.5.2020	Positive				Positive	18-29
HS065	HS065	39	29715	Orang Asli	Male	CITIZEN	Kerling	Selangor								RUMAH EHSAN	18.5.2020	18.5.2020	19.5.2020	Positive				Positive	30-39
HS066	HS066	21	36349	Malay	Male	CITIZEN	Serendah	Selangor								UPSI	20.5.2020	20.5.2020	21.5.2020	Positive				Positive	18-29
HS067	HS067	40	29433	Chinese	Female	CITIZEN	Ulu Yam	Selangor								PUSAT BANTUAN KELUARGA NEGERI SELANGOR	20.5.2020	20.5.2020	21.5.2020	Positive				Positive	40-49
HS068	HS068	33	31871	Malay	Female	CITIZEN	Ampang Pecah	Selangor								RUMAH EHSAN KONTAK KHOLID	21.5.2020	21.5.2020	22.5.2020	Positive				Positive	30-39
HS069	HS069	41	29017	Orang Asli	Male	CITIZEN	Ampang Pecah	Selangor								SARINGAN ORANG ASLI TUN RAZAK	21.5.2020	21.5.2020	22.5.2020	Positive				Positive	40-49
HS070	HS070	2	43420	Orang Asli	Female	CITIZEN	Ampang Pecah	Selangor								SARINGAN ORANG ASLI TUN RAZAK	21.5.2020	21.5.2020	22.5.2020	Positive				Positive	0-4
HS071	HS071	41	28959	Orang Asli	Female	CITIZEN	Ampang Pecah	Selangor								SARINGAN ORANG ASLI TUN RAZAK	21.5.2020	21.5.2020	23.5.2020	Positive				Positive	40-49
HS072	HS072	64	20627	Orang Asli	Female	CITIZEN	Ampang Pecah	Selangor								SARINGAN ORANG ASLI TUN RAZAK	21.5.2020	21.5.2020	23.5.2020	Positive				Positive	60-69
HS073	HS073	16	41683	Orang Asli	Female	CITIZEN	Ampang Pecah	Selangor								SARINGAN ORANG ASLI TUN RAZAK	21.5.2020	21.5.2020	23.5.2020	Positive				Positive	13-17
HS074	HS074	8	41195	Orang Asli	Male	CITIZEN	Ampang Pecah	Selangor								SARINGAN ORANG ASLI TUN RAZAK	21.5.2020	21.5.2020	23.5.2020	Positive				Positive	5-12
HS075	HS075	16	38248	Malay	Male	CITIZEN	Serendah	Selangor								AKADEMI SYAHADAH	22.5.2020	22.5.2020	24.5.2020	Positive				Positive	13-17
HS076	HS076	18	37491	Malay	Male	CITIZEN	Kalumpang	Selangor								AKADEMI INTERGRASI TAHFIZ AL FALAH,	11.6.2020	11.6.2020	19.6.2020	Positive				Positive	18-29
