# Supplementary material for: Understanding the progress of COVID-19 transmission in a rural district: a social network approach
Source: PeerJ. 2024 Nov 28;12:e18571. doi: 10.7717/peerj.18571 (PMC11608564; doi:10.7717/peerj.18571)
Supplement: Supplemental Information 9 [file peerj-12-18571-s009.xlsx]

## Sheet: Sheet1
Source	Target	Relationship	Lab result	Relation2	AgeEgo	AgeTarget	AgeEgo2	AgeTarget2
HS002	HS003	TABLIGH	POSITIF	SPIRITUAL GATHERING	70-79	18-29	73	20
HS002	HS004	TABLIGH	POSITIF	SPIRITUAL GATHERING	70-79	30-39	73	37
HS002	HS013	TABLIGH	POSITIF	SPIRITUAL GATHERING	70-79	18-29	73	24
HS002	HS014	TABLIGH	POSITIF	SPIRITUAL GATHERING	70-79	30-39	73	36
HS002	HS017	TABLIGH	POSITIF	SPIRITUAL GATHERING	70-79	18-29	73	24
HS002	HS018	TABLIGH	POSITIF	SPIRITUAL GATHERING	70-79	30-39	73	35
HS002	HS019	TABLIGH	POSITIF	SPIRITUAL GATHERING	70-79	18-29	73	25
HS002	HS020	SURAU	POSITIF	SPIRITUAL GATHERING	70-79	60-69	73	64
HS002	HS031	TABLIGH	POSITIF	SPIRITUAL GATHERING	70-79	50-59	73	56
HS002	HS032	TABLIGH	POSITIF	SPIRITUAL GATHERING	70-79	30-39	73	32
HS002	HS049	TABLIGH	POSITIF	SPIRITUAL GATHERING	70-79	60-69	73	62
HS002	HS050	TABLIGH	POSITIF	SPIRITUAL GATHERING	70-79	30-39	73	30
HS003	HS002	TABLIGH	POSITIF	SPIRITUAL GATHERING	18-29	70-79	20	73
HS003	HS004	TABLIGH	POSITIF	SPIRITUAL GATHERING	18-29	30-39	20	37
HS003	HS013	TABLIGH	POSITIF	SPIRITUAL GATHERING	18-29	18-29	20	24
HS003	HS014	TABLIGH	POSITIF	SPIRITUAL GATHERING	18-29	30-39	20	36
HS003	HS017	TABLIGH	POSITIF	SPIRITUAL GATHERING	18-29	18-29	20	24
HS003	HS018	TABLIGH	POSITIF	SPIRITUAL GATHERING	18-29	30-39	20	35
HS003	HS019	TABLIGH	POSITIF	SPIRITUAL GATHERING	18-29	18-29	20	25
HS003	HS020	TABLIGH	POSITIF	SPIRITUAL GATHERING	18-29	60-69	20	64
HS003	HS031	TABLIGH	POSITIF	SPIRITUAL GATHERING	18-29	50-59	20	56
HS003	HS032	TABLIGH	POSITIF	SPIRITUAL GATHERING	18-29	30-39	20	32
HS003	HS049	TABLIGH	POSITIF	SPIRITUAL GATHERING	18-29	60-69	20	62
HS003	HS050	TABLIGH	POSITIF	SPIRITUAL GATHERING	18-29	30-39	20	30
HS004	HS002	TABLIGH	POSITIF	SPIRITUAL GATHERING	30-39	70-79	37	73
HS004	HS003	TABLIGH	POSITIF	SPIRITUAL GATHERING	30-39	18-29	37	20
HS004	HS014	TABLIGH	POSITIF	SPIRITUAL GATHERING	30-39	30-39	37	36
HS004	HS017	TABLIGH	POSITIF	SPIRITUAL GATHERING	30-39	18-29	37	24
HS004	HS018	TABLIGH	POSITIF	SPIRITUAL GATHERING	30-39	30-39	37	35
HS004	HS019	TABLIGH	POSITIF	SPIRITUAL GATHERING	30-39	18-29	37	25
HS004	HS020	TABLIGH	POSITIF	SPIRITUAL GATHERING	30-39	60-69	37	64
HS004	HS031	TABLIGH	POSITIF	SPIRITUAL GATHERING	30-39	50-59	37	56
HS004	HS032	TABLIGH	POSITIF	SPIRITUAL GATHERING	30-39	30-39	37	32
HS004	HS049	TABLIGH	POSITIF	SPIRITUAL GATHERING	30-39	60-69	37	62
HS004	HS050	TABLIGH	POSITIF	SPIRITUAL GATHERING	30-39	30-39	37	30
HS005	HS007	KELUARGA	POSITIF	FAMILY	50-59	18-29	55	25
HS005	HS008	KELUARGA	POSITIF	FAMILY	50-59	18-29	55	19
HS005	HS010	KELUARGA	POSITIF	FAMILY	50-59	60-69	55	60
HS005	HS015	SEKOLAH	POSITIF	WORK/SCHOOL	50-59	40-49	55	49
HS005	HS016	SEKOLAH	POSITIF	WORK/SCHOOL	50-59	30-39	55	39
HS005	HS025	SEKOLAH	POSITIF	WORK/SCHOOL	50-59	5-12	55	9
HS006	HS022	KELUARGA	POSITIF	FAMILY	50-59	13-17	59	16
HS006	HS024	KELUARGA	POSITIF	FAMILY	50-59	50-59	59	53
HS007	HS005	KELUARGA	POSITIF	FAMILY	18-29	50-59	25	55
HS007	HS008	KELUARGA	POSITIF	FAMILY	18-29	18-29	25	19
HS007	HS010	KELUARGA	POSITIF	FAMILY	18-29	60-69	25	60
HS008	HS005	KELUARGA	POSITIF	FAMILY	18-29	50-59	19	55
HS008	HS007	KELUARGA	POSITIF	FAMILY	18-29	18-29	19	25
HS008	HS010	KELUARGA	POSITIF	FAMILY	18-29	60-69	19	60
HS009	HS029	TABLIGH	POSITIF	SPIRITUAL GATHERING	50-59	40-49	53	46
HS010	HS005	KELUARGA	POSITIF	FAMILY	60-69	50-59	60	55
HS010	HS007	KELUARGA	POSITIF	FAMILY	60-69	18-29	60	25
HS010	HS008	KELUARGA	POSITIF	FAMILY	60-69	18-29	60	19
HS011	HS026	KELUARGA	POSITIF	FAMILY	50-59	50-59	58	55
HS011	HS027	KELUARGA	POSITIF	FAMILY	50-59	18-29	58	24
HS011	HS028	KELUARGA	POSITIF	FAMILY	50-59	13-17	58	13
HS011	HS033	KELUARGA	POSITIF	FAMILY	50-59	18-29	58	20
HS012	HS043	SURAU	POSITIF	SPIRITUAL GATHERING	18-29	60-69	22	61
HS013	HS002	TABLIGH	POSITIF	SPIRITUAL GATHERING	18-29	70-79	24	73
HS013	HS003	TABLIGH	POSITIF	SPIRITUAL GATHERING	18-29	18-29	24	20
HS013	HS004	TABLIGH	POSITIF	SPIRITUAL GATHERING	18-29	30-39	24	37
HS013	HS014	TABLIGH	POSITIF	SPIRITUAL GATHERING	18-29	30-39	24	36
HS013	HS017	TABLIGH	POSITIF	SPIRITUAL GATHERING	18-29	18-29	24	24
HS013	HS018	TABLIGH	POSITIF	SPIRITUAL GATHERING	18-29	30-39	24	35
HS013	HS019	TABLIGH	POSITIF	SPIRITUAL GATHERING	18-29	18-29	24	25
HS013	HS020	SURAU	POSITIF	SPIRITUAL GATHERING	18-29	60-69	24	64
HS013	HS031	TABLIGH	POSITIF	SPIRITUAL GATHERING	18-29	50-59	24	56
HS013	HS032	TABLIGH	POSITIF	SPIRITUAL GATHERING	18-29	30-39	24	32
HS013	HS049	TABLIGH	POSITIF	SPIRITUAL GATHERING	18-29	60-69	24	62
HS013	HS050	TABLIGH	POSITIF	SPIRITUAL GATHERING	18-29	30-39	24	30
HS014	HS002	TABLIGH	POSITIF	SPIRITUAL GATHERING	30-39	70-79	36	73
HS014	HS003	TABLIGH	POSITIF	SPIRITUAL GATHERING	30-39	18-29	36	20
HS014	HS004	TABLIGH	POSITIF	SPIRITUAL GATHERING	30-39	30-39	36	37
HS014	HS013	TABLIGH	POSITIF	SPIRITUAL GATHERING	30-39	18-29	36	24
HS014	HS017	TABLIGH	POSITIF	SPIRITUAL GATHERING	30-39	18-29	36	24
HS014	HS018	TABLIGH	POSITIF	SPIRITUAL GATHERING	30-39	30-39	36	35
HS014	HS019	TABLIGH	POSITIF	SPIRITUAL GATHERING	30-39	18-29	36	25
HS014	HS020	SURAU	POSITIF	SPIRITUAL GATHERING	30-39	60-69	36	64
HS014	HS031	TABLIGH	POSITIF	SPIRITUAL GATHERING	30-39	50-59	36	56
HS014	HS032	TABLIGH	POSITIF	SPIRITUAL GATHERING	30-39	30-39	36	32
HS014	HS049	TABLIGH	POSITIF	SPIRITUAL GATHERING	30-39	60-69	36	62
HS014	HS050	TABLIGH	POSITIF	SPIRITUAL GATHERING	30-39	30-39	36	30
HS015	HS005	SEKERJA	POSITIF	WORK/SCHOOL	40-49	50-59	49	55
HS015	HS016	SEKERJA	POSITIF	WORK/SCHOOL	40-49	30-39	49	39
HS016	HS005	SEKERJA	POSITIF	WORK/SCHOOL	30-39	50-59	39	55
HS016	HS015	SEKERJA	POSITIF	WORK/SCHOOL	30-39	40-49	39	49
HS016	HS025	KELUARGA	POSITIF	FAMILY	30-39	5-12	39	9
HS017	HS002	TABLIGH	POSITIF	SPIRITUAL GATHERING	18-29	70-79	24	73
HS017	HS003	TABLIGH	POSITIF	SPIRITUAL GATHERING	18-29	18-29	24	20
HS017	HS004	TABLIGH	POSITIF	SPIRITUAL GATHERING	18-29	30-39	24	37
HS017	HS013	TABLIGH	POSITIF	SPIRITUAL GATHERING	18-29	18-29	24	24
HS017	HS014	TABLIGH	POSITIF	SPIRITUAL GATHERING	18-29	30-39	24	36
HS017	HS018	TABLIGH	POSITIF	SPIRITUAL GATHERING	18-29	30-39	24	35
HS017	HS019	TABLIGH	POSITIF	SPIRITUAL GATHERING	18-29	18-29	24	25
HS017	HS020	SURAU	POSITIF	SPIRITUAL GATHERING	18-29	60-69	24	64
HS017	HS031	TABLIGH	POSITIF	SPIRITUAL GATHERING	18-29	50-59	24	56
HS017	HS032	TABLIGH	POSITIF	SPIRITUAL GATHERING	18-29	30-39	24	32
HS017	HS049	TABLIGH	POSITIF	SPIRITUAL GATHERING	18-29	60-69	24	62
HS017	HS050	TABLIGH	POSITIF	SPIRITUAL GATHERING	18-29	30-39	24	30
HS018	HS002	TABLIGH	POSITIF	SPIRITUAL GATHERING	30-39	70-79	35	73
HS018	HS003	TABLIGH	POSITIF	SPIRITUAL GATHERING	30-39	18-29	35	20
HS018	HS004	TABLIGH	POSITIF	SPIRITUAL GATHERING	30-39	30-39	35	37
HS018	HS013	TABLIGH	POSITIF	SPIRITUAL GATHERING	30-39	18-29	35	24
HS018	HS014	TABLIGH	POSITIF	SPIRITUAL GATHERING	30-39	30-39	35	36
HS018	HS017	TABLIGH	POSITIF	SPIRITUAL GATHERING	30-39	18-29	35	24
HS018	HS019	TABLIGH	POSITIF	SPIRITUAL GATHERING	30-39	18-29	35	25
HS018	HS020	TABLIGH	POSITIF	SPIRITUAL GATHERING	30-39	60-69	35	64
HS018	HS031	TABLIGH	POSITIF	SPIRITUAL GATHERING	30-39	50-59	35	56
HS018	HS032	TABLIGH	POSITIF	SPIRITUAL GATHERING	30-39	30-39	35	32
HS018	HS049	TABLIGH	POSITIF	SPIRITUAL GATHERING	30-39	60-69	35	62
HS018	HS050	TABLIGH	POSITIF	SPIRITUAL GATHERING	30-39	30-39	35	30
HS019	HS002	TABLIGH	POSITIF	SPIRITUAL GATHERING	18-29	70-79	25	73
HS019	HS003	TABLIGH	POSITIF	SPIRITUAL GATHERING	18-29	18-29	25	20
HS019	HS004	TABLIGH	POSITIF	SPIRITUAL GATHERING	18-29	30-39	25	37
HS019	HS013	TABLIGH	POSITIF	SPIRITUAL GATHERING	18-29	18-29	25	24
HS019	HS014	TABLIGH	POSITIF	SPIRITUAL GATHERING	18-29	30-39	25	36
HS019	HS017	TABLIGH	POSITIF	SPIRITUAL GATHERING	18-29	18-29	25	24
HS019	HS018	TABLIGH	POSITIF	SPIRITUAL GATHERING	18-29	30-39	25	35
HS019	HS020	SURAU	POSITIF	SPIRITUAL GATHERING	18-29	60-69	25	64
HS019	HS031	TABLIGH	POSITIF	SPIRITUAL GATHERING	18-29	50-59	25	56
HS019	HS032	TABLIGH	POSITIF	SPIRITUAL GATHERING	18-29	30-39	25	32
HS019	HS049	TABLIGH	POSITIF	SPIRITUAL GATHERING	18-29	60-69	25	62
HS019	HS050	TABLIGH	POSITIF	SPIRITUAL GATHERING	18-29	30-39	25	30
HS020	HS002	SURAU	POSITIF	SPIRITUAL GATHERING	60-69	70-79	64	73
HS020	HS003	SURAU	POSITIF	SPIRITUAL GATHERING	60-69	18-29	64	20
HS020	HS004	SURAU	POSITIF	SPIRITUAL GATHERING	60-69	30-39	64	37
HS020	HS013	SURAU	POSITIF	SPIRITUAL GATHERING	60-69	18-29	64	24
HS020	HS014	SURAU	POSITIF	SPIRITUAL GATHERING	60-69	30-39	64	36
HS020	HS017	SURAU	POSITIF	SPIRITUAL GATHERING	60-69	18-29	64	24
HS020	HS018	SURAU	POSITIF	SPIRITUAL GATHERING	60-69	30-39	64	35
HS020	HS019	SURAU	POSITIF	SPIRITUAL GATHERING	60-69	18-29	64	25
HS020	HS031	SURAU	POSITIF	SPIRITUAL GATHERING	60-69	50-59	64	56
HS020	HS032	SURAU	POSITIF	SPIRITUAL GATHERING	60-69	30-39	64	32
HS020	HS049	SURAU	POSITIF	SPIRITUAL GATHERING	60-69	60-69	64	62
HS020	HS050	SURAU	POSITIF	SPIRITUAL GATHERING	60-69	30-39	64	30
HS022	HS006	KELUARGA	POSITIF	FAMILY	13-17	50-59	16	59
HS022	HS024	KELUARGA	POSITIF	FAMILY	13-17	50-59	16	53
HS024	HS006	KELUARGA	POSITIF	FAMILY	50-59	50-59	53	59
HS024	HS022	KELUARGA	POSITIF	FAMILY	50-59	13-17	53	16
HS025	HS005	SEKOLAH	POSITIF	WORK/SCHOOL	5-12	50-59	9	55
HS025	HS016	KELUARGA	POSITIF	FAMILY	5-12	30-39	9	39
HS025	HS040	SEKOLAH	POSITIF	WORK/SCHOOL	5-12	5-12	9	9
HS025	HS042	SEKOLAH	POSITIF	WORK/SCHOOL	5-12	5-12	9	9
HS025	HS044	SEKOLAH	POSITIF	WORK/SCHOOL	5-12	5-12	9	9
HS027	HS011	KELUARGA	POSITIF	FAMILY	18-29	50-59	24	58
HS027	HS026	KELUARGA	POSITIF	FAMILY	18-29	50-59	24	55
HS027	HS028	KELUARGA	POSITIF	FAMILY	18-29	13-17	24	13
HS027	HS033	KELUARGA	POSITIF	FAMILY	18-29	18-29	24	20
HS028	HS011	KELUARGA	POSITIF	FAMILY	13-17	50-59	13	58
HS028	HS026	KELUARGA	POSITIF	FAMILY	13-17	50-59	13	55
HS028	HS027	KELUARGA	POSITIF	FAMILY	13-17	18-29	13	24
HS028	HS033	KELUARGA	POSITIF	FAMILY	13-17	18-29	13	20
HS029	HS009	TABLIGH	POSITIF	SPIRITUAL GATHERING	40-49	50-59	46	53
HS029	HS049	TABLIGH	POSITIF	SPIRITUAL GATHERING	40-49	60-69	46	62
HS031	HS002	TABLIGH	POSITIF	SPIRITUAL GATHERING	50-59	70-79	56	73
HS031	HS003	TABLIGH	POSITIF	SPIRITUAL GATHERING	50-59	18-29	56	20
HS031	HS004	TABLIGH	POSITIF	SPIRITUAL GATHERING	50-59	30-39	56	37
HS031	HS013	TABLIGH	POSITIF	SPIRITUAL GATHERING	50-59	18-29	56	24
HS031	HS014	TABLIGH	POSITIF	SPIRITUAL GATHERING	50-59	30-39	56	36
HS031	HS017	TABLIGH	POSITIF	SPIRITUAL GATHERING	50-59	18-29	56	24
HS031	HS018	TABLIGH	POSITIF	SPIRITUAL GATHERING	50-59	30-39	56	35
HS031	HS019	TABLIGH	POSITIF	SPIRITUAL GATHERING	50-59	18-29	56	25
HS031	HS020	SURAU	POSITIF	SPIRITUAL GATHERING	50-59	60-69	56	64
HS031	HS032	TABLIGH	POSITIF	SPIRITUAL GATHERING	50-59	30-39	56	32
HS031	HS049	TABLIGH	POSITIF	SPIRITUAL GATHERING	50-59	60-69	56	62
HS031	HS050	TABLIGH	POSITIF	SPIRITUAL GATHERING	50-59	30-39	56	30
HS032	HS002	TABLIGH	POSITIF	SPIRITUAL GATHERING	30-39	70-79	32	73
HS032	HS003	TABLIGH	POSITIF	SPIRITUAL GATHERING	30-39	18-29	32	20
HS032	HS004	TABLIGH	POSITIF	SPIRITUAL GATHERING	30-39	30-39	32	37
HS032	HS013	TABLIGH	POSITIF	SPIRITUAL GATHERING	30-39	18-29	32	24
HS032	HS014	TABLIGH	POSITIF	SPIRITUAL GATHERING	30-39	30-39	32	36
HS032	HS017	TABLIGH	POSITIF	SPIRITUAL GATHERING	30-39	18-29	32	24
HS032	HS018	TABLIGH	POSITIF	SPIRITUAL GATHERING	30-39	30-39	32	35
HS032	HS019	TABLIGH	POSITIF	SPIRITUAL GATHERING	30-39	18-29	32	25
HS032	HS020	TABLIGH	POSITIF	SPIRITUAL GATHERING	30-39	60-69	32	64
HS032	HS031	TABLIGH	POSITIF	SPIRITUAL GATHERING	30-39	50-59	32	56
HS032	HS049	TABLIGH	POSITIF	SPIRITUAL GATHERING	30-39	60-69	32	62
HS032	HS050	TABLIGH	POSITIF	SPIRITUAL GATHERING	30-39	30-39	32	30
HS033	HS011	KELUARGA	POSITIF	FAMILY	18-29	50-59	20	58
HS033	HS026	KELUARGA	POSITIF	FAMILY	18-29	50-59	20	55
HS033	HS027	KELUARGA	POSITIF	FAMILY	18-29	18-29	20	24
HS033	HS028	KELUARGA	POSITIF	FAMILY	18-29	13-17	20	13
HS038	HS005	SEKOLAH	POSITIF	WORK/SCHOOL	5-12	50-59	12	55
HS038	HS015	SEKOLAH	POSITIF	WORK/SCHOOL	5-12	40-49	12	49
HS038	HS016	SEKOLAH	POSITIF	WORK/SCHOOL	5-12	30-39	12	39
HS043	HS012	SURAU	POSITIF	SPIRITUAL GATHERING	60-69	18-29	61	22
HS045	HS047	SEKOLAH	POSITIF	WORK/SCHOOL	40-49	5-12	41	7
HS047	HS045	SEKOLAH	POSITIF	WORK/SCHOOL	5-12	40-49	7	41
HS049	HS002	TABLIGH	POSITIF	SPIRITUAL GATHERING	60-69	70-79	62	73
HS049	HS003	TABLIGH	POSITIF	SPIRITUAL GATHERING	60-69	18-29	62	20
HS049	HS004	TABLIGH	POSITIF	SPIRITUAL GATHERING	60-69	30-39	62	37
HS049	HS013	TABLIGH	POSITIF	SPIRITUAL GATHERING	60-69	18-29	62	24
HS049	HS014	TABLIGH	POSITIF	SPIRITUAL GATHERING	60-69	30-39	62	36
HS049	HS017	TABLIGH	POSITIF	SPIRITUAL GATHERING	60-69	18-29	62	24
HS049	HS018	TABLIGH	POSITIF	SPIRITUAL GATHERING	60-69	30-39	62	35
HS049	HS019	TABLIGH	POSITIF	SPIRITUAL GATHERING	60-69	18-29	62	25
HS049	HS020	TABLIGH	POSITIF	SPIRITUAL GATHERING	60-69	60-69	62	64
HS049	HS031	TABLIGH	POSITIF	SPIRITUAL GATHERING	60-69	50-59	62	56
HS049	HS032	TABLIGH	POSITIF	SPIRITUAL GATHERING	60-69	30-39	62	32
HS049	HS050	TABLIGH	POSITIF	SPIRITUAL GATHERING	60-69	30-39	62	30
HS050	HS002	TABLIGH	POSITIF	SPIRITUAL GATHERING	30-39	70-79	30	73
HS050	HS003	TABLIGH	POSITIF	SPIRITUAL GATHERING	30-39	18-29	30	20
HS050	HS004	TABLIGH	POSITIF	SPIRITUAL GATHERING	30-39	30-39	30	37
HS050	HS013	TABLIGH	POSITIF	SPIRITUAL GATHERING	30-39	18-29	30	24
HS050	HS014	TABLIGH	POSITIF	SPIRITUAL GATHERING	30-39	30-39	30	36
HS050	HS017	TABLIGH	POSITIF	SPIRITUAL GATHERING	30-39	18-29	30	24
HS050	HS018	TABLIGH	POSITIF	SPIRITUAL GATHERING	30-39	30-39	30	35
HS050	HS019	TABLIGH	POSITIF	SPIRITUAL GATHERING	30-39	18-29	30	25
HS050	HS020	TABLIGH	POSITIF	SPIRITUAL GATHERING	30-39	60-69	30	64
HS050	HS031	TABLIGH	POSITIF	SPIRITUAL GATHERING	30-39	50-59	30	56
HS050	HS032	TABLIGH	POSITIF	SPIRITUAL GATHERING	30-39	30-39	30	32
HS050	HS049	TABLIGH	POSITIF	SPIRITUAL GATHERING	30-39	60-69	30	62
HS056	HS057	TAHFIZ	POSITIF	WORK/SCHOOL	18-29	18-29	21	20
HS056	HS059	TAHFIZ	POSITIF	WORK/SCHOOL	18-29	13-17	21	14
HS057	HS056	TAHFIZ	POSITIF	WORK/SCHOOL	18-29	18-29	20	21
HS057	HS059	TAHFIZ	POSITIF	WORK/SCHOOL	18-29	13-17	20	14
HS059	HS056	TAHFIZ	POSITIF	WORK/SCHOOL	13-17	18-29	14	21
HS059	HS057	TAHFIZ	POSITIF	WORK/SCHOOL	13-17	18-29	14	20
HS062	HS068	INSTITUTION	POSITIF	WORK/SCHOOL	40-49	30-39	49	33
